# Supplementary material for: Mechanochemical protocol facilitates the generation of arylmanganese nucleophiles from unactivated manganese metal
Source: Royal Society of Chemistry journal article supplement (doi:10.1039/d2sc05468j), 2022-11-28
Supplement: d2sc05468j1.pdf [file d2sc05468j1.pdf]

# **Mechanochemical Protocol Facilitates the Generation of Arylmanganese Nucleophiles from Unactivated Manganese Metal**

Rina Takahashi, Pan Gao, Koji Kubota,\* and Hajime Ito\*

## **Table of Contents**

- 1. General and Materials**
- 2. List of Substrates Used in This Study**
- 3. General Procedure for Synthesis of Organomanganese Reagents Using Ball Mill**
- 4. Air Stability of Organomanganese reagents Prepared by Ball Milling**
- 5. Deuteration Experiments**
- 6. Details of Solution-based Reactions**
- 7. Sample Preparation for XPS Analysis**
- 8. Characterization of Products**
- 9. References**
- 10. NMR Spectra**

## 1. General and Materials

Materials were obtained from commercial suppliers and purified using standard procedures, unless otherwise noted. Solvents were purchased from commercial suppliers and further dried over molecular sieve (MS 4Å). Manganese powder (> 98%, product no. 130-06732) was purchased from Wako Pure Chemical Industries, Co., Ltd. All reactions were performed using grinding vessels in the Retsch MM 400 (Figure S1). Both jars and balls were made of stainless steel (SUS400B and SUS420J2, respectively, Figure S2), tungsten carbide, or zirconia. NMR spectra were recorded on JEOL JNM-ECZ400S and JNM-ECS400 spectrometers ( $^1\text{H}$ : 392, 399, or 401 MHz,  $^{13}\text{C}$ : 99 or 100 MHz,  $^{19}\text{F}$ : 375 or 377 MHz). Tetramethylsilane ( $^1\text{H}$ ),  $\text{CDCl}_3$  ( $^{13}\text{C}$ ), and (Trifluoromethyl)benzene ( $^{19}\text{F}$ ) were employed as internal standards, respectively. Multiplicity was recorded as follows: s = singlet, brs = broad singlet, d = doublet, t = triplet, q = quartet, and m = multiplet. Fluorobenzene, 1,2-difluorobenzene, and hexafluorobenzene were used as an internal standard to determine the NMR yields. Thermographic images were obtained using the InfRec Thermo GEAR (NEC Avio Infrared Technologies Co., Ltd.). Recycling preparative gel permeation chromatography (GPC) was conducted with the JAI LC-9101 using  $\text{CHCl}_3$  as the eluent with the JAIGEL-1H. X-Ray photoelectron spectroscopy (XPS) was performed using JEOL JPS-9200. High-resolution mass spectra were recorded at the Global Facility Center, Hokkaido University.

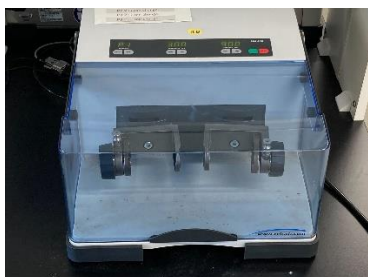

**Figure S1.** Retsch MM400 used in this study.

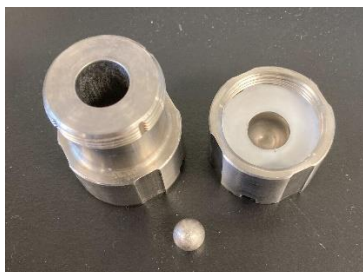

**Figure S2.** Stainless jars and balls used in this study.

## 2. List of Substrates Used in This Study

Aryl halides except **1k–1n** were obtained from commercial suppliers and were used as received. **1k**,<sup>[1]</sup> **1l**,<sup>[2]</sup> **1m**,<sup>[3]</sup> and **1n**<sup>[4]</sup> were synthesized according to the reported procedures.

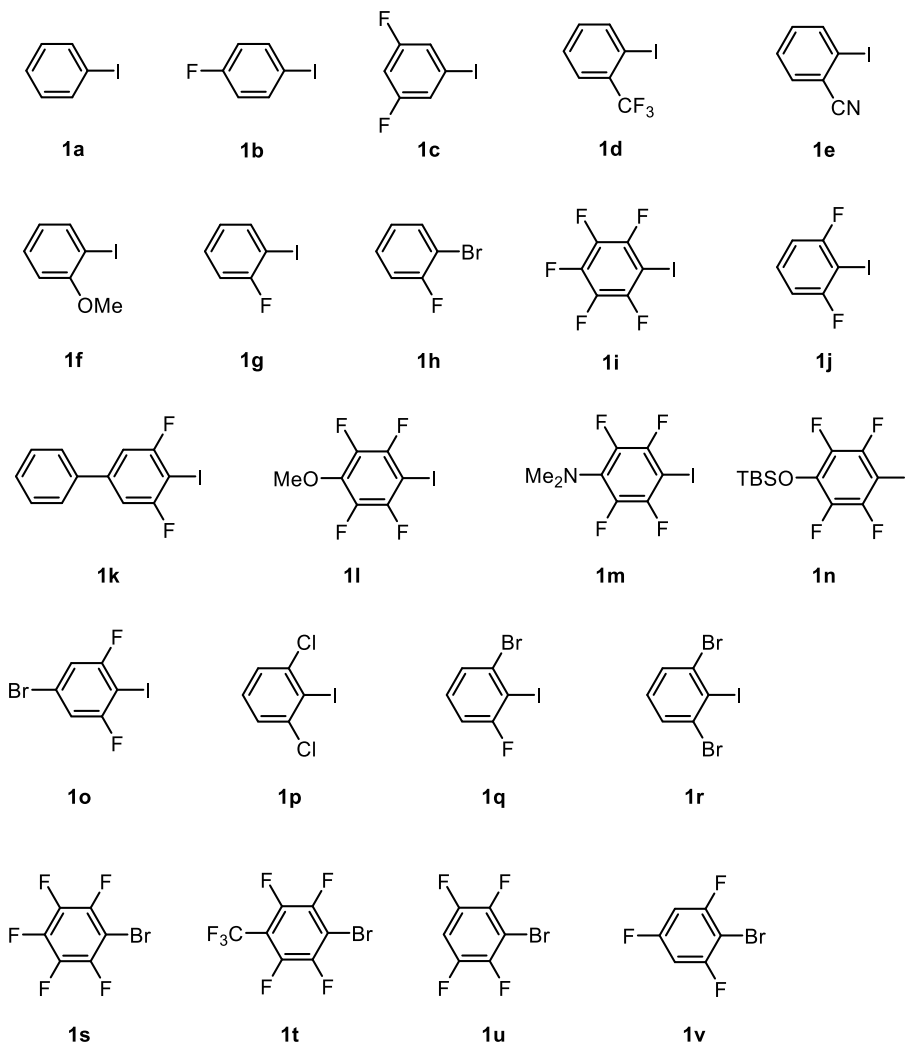

**Figure S3.** List of aryl halides used in this study.

All electrophiles were obtained from commercial suppliers. **2a** and **2b** were distilled before use. **2c**, **2d** and **5a**, **5b** were used as received.

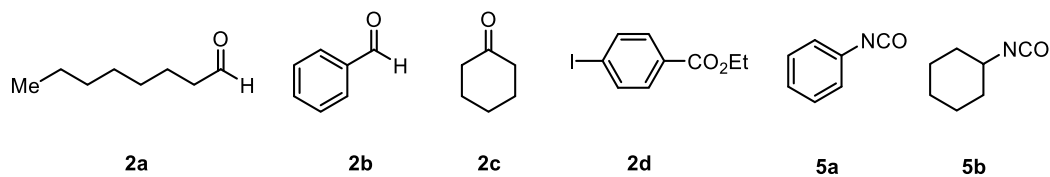

**Figure S4.** List of electrophiles used in this study.

### 3. General Procedure for Synthesis of Organomanganese Reagents Using a Ball Mill

#### Procedure for the nucleophilic addition to various electrophiles (A)

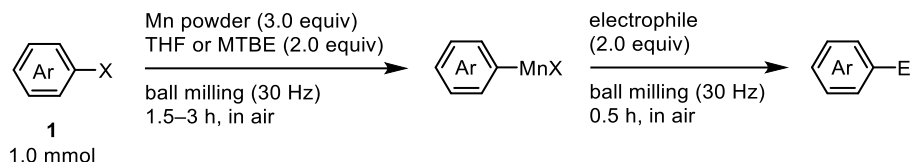

All synthetic operations were carried out under atmospheric conditions. Manganese powder (3.0 mmol, 3.0 equiv) were placed in a milling jar (5 mL) with a ball (10 mm, diameter). An aryl halide (**1**, 1.0 mmol, 1.0 equiv) and liquid additive [2.0 mmol, 2.0 equiv, THF (162  $\mu$ L) or MTBE (236  $\mu$ L)] were added to the jar using a syringe. After the jar was closed without purging with inert gas, the jar was placed in the ball mill (Retsch MM 400, 1.5–3 h, 30 Hz). After ball milling, the jar was opened in air and charged with an electrophile (2.0 mmol, 2.0 equiv). In order to prevent undesired protonation of mechanochemically generated arylmanganese nucleophiles by atmospheric moisture, an electrophile should be added as rapidly as possible (< 1 min). The jar was then closed without purging with inert gas, and was placed in the ball mill (Retsch MM 400, 0.5 h, 30 Hz). After ball milling, the reaction mixture was quenched with 1 M HCl and extracted with ethyl acetate (30 mL $\times$ 3). The solution was washed with brine and dried over MgSO<sub>4</sub>. After the removal of the solvents under reduced pressure, the crude material was purified by flash column chromatography (SiO<sub>2</sub>, hexane/ethyl acetate, 100:0 to 80:20) to give the corresponding product. In some cases, the product was further purified by recycling GPC.

#### Procedure for the palladium-catalyzed cross-coupling reactions (B)

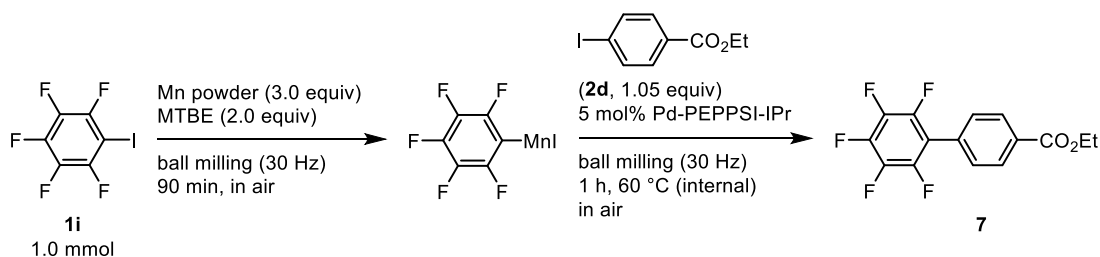

The reaction was conducted based on a solution-state reaction reported by P. Knochel *et al.*<sup>[5]</sup> All synthetic operations were carried out under atmospheric conditions. Manganese powder (3.0 mmol, 3.0 equiv) were placed in a milling jar (5 mL) with a ball (10 mm, diameter). 1,2,3,4,5-Pentafluoro-6-iodobenzene (**1i**, 1.0 mmol, 1.0 equiv) and MTBE (2.0 mmol, 2.0 equiv, 236  $\mu$ L) were added to the jar using a syringe. After the jar was closed without purging with inert gas, the jar was placed in the ball mill (Retsch MM 400, 90 min, 30 Hz). After ball milling, the jar was opened in air and charged with Pd-PEPPSI-IPr (0.05 mmol, 5 mol%) and ethyl 4-iodobenzoate (**2d**, 1.05 mmol, 1.05 equiv). The

jar was then closed without purging with inert gas, and was placed in the ball mill (Retsch MM 400, 1 h, 30 Hz) and a heat gun (Takagi HG-1450B). After ball milling while applying heated air to the outside of the milling jar (the preset temperature at 120 °C), the reaction mixture was quenched with 1 M HCl and extracted with ethyl acetate (30 mL×3). The solution was washed with brine and dried over MgSO<sub>4</sub>. After the removal of the solvents under reduced pressure, the crude material was purified by flash column chromatography (SiO<sub>2</sub>, hexane) and recycling GPC using CHCl<sub>3</sub> as the eluent.

#### Set-up procedure for high-temperature ball-milling

The heat gun was fixed with clamps and placed directly above the ball milling jar (distance between the heat gun and ball milling jar: ca. 1 cm) (Figure S5). The mechanochemical cross-coupling reactions were conducted while applying heated air to the outside of the milling jar (the preset temperature at 120 °C). The temperature inside the milling jar after the solid-state coupling reactions was confirmed by observation with a thermography camera immediately after opening the milling jar.

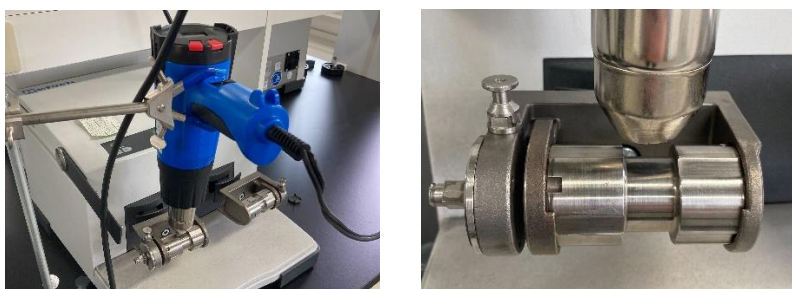

**Figure S5.** The set-up procedure for a heat gun on MM400.

#### 4. Air Stability of Organomanganese Reagents Prepared by Ball Milling

We conducted a number of nucleophilic addition reactions with **5b** after exposing the mechanochemically generated arylmanganese nucleophile **1i** to air for different lengths of time (5–60 min; Figure S6). The results showed that the yield of **6b** decreased when the generated arylmanganese species were exposed to air for 5 min or more.

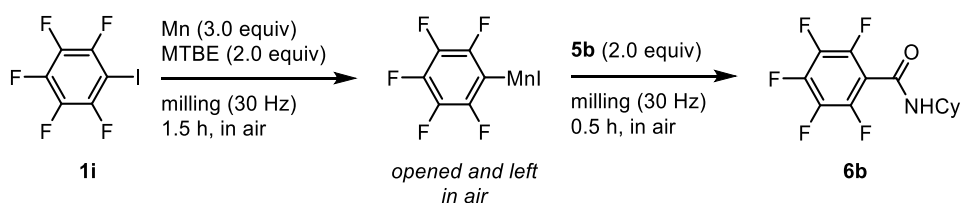

| Time (min) | <1 | 5  | 10 | 30 | 60 |
|------------|----|----|----|----|----|
| Yield (%)  | 91 | 61 | 51 | 38 | 18 |

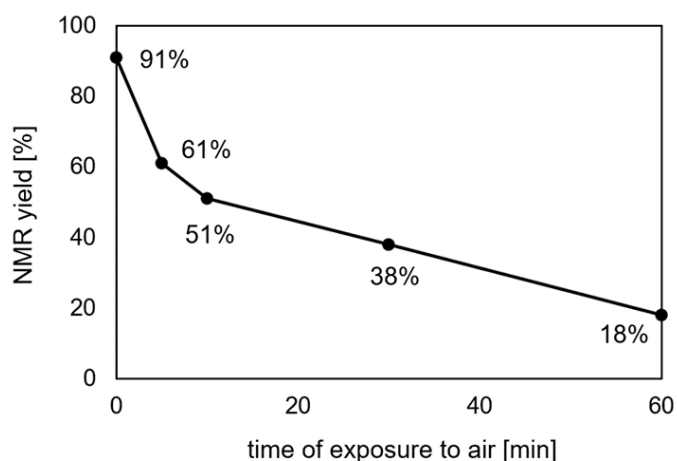

**Figure S6.** Stability of the mechanochemically generated organomanganese reagent in air.

We also checked the air stability of the mechanochemically generated organomanganese reagent from **1o** (Figure S7). We found that the yield of **6i** decreased when the generated arylmanganese species were exposed to air for 5 min or more, which was a result similar to that of **1i**.

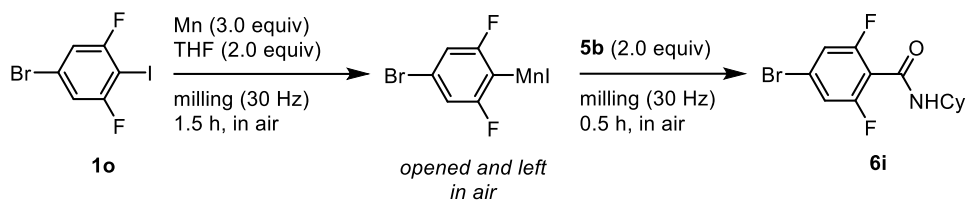

| Time (min)    | <1 | 5  | 10 | 30 |
|---------------|----|----|----|----|
| NMR Yield (%) | 79 | 66 | 41 | 11 |

**Figure S7.** Stability of the mechanochemically generated organomanganese reagent from **1o** in air.

## 5. Deuteration Experiments

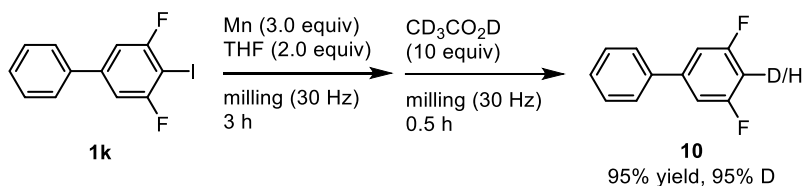

All synthetic operations were carried out under atmospheric conditions. Manganese powder (3.0 mmol, 3.0 equiv) and 3,5-difluoro-4-iodo-1,1'-biphenyl (**1k**) were placed in a milling jar (5 mL) with a ball (10 mm, diameter). THF (2.0 mmol, 2.0 equiv, 162  $\mu$ L) were added to the jar using a syringe. After the jar was closed without purging with inert gas, the jar was placed in the ball mill (Retsch MM 400, 3 h, 30 Hz). After ball milling, the reaction was quenched by adding acetic acid-d<sub>4</sub> (10 mmol, 10 equiv) immediately after opening the jar in order to prevent undesired protonation by atmospheric moisture. The jar was then closed without purging with inert gas, and was placed in the ball mill (Retsch MM 400, 0.5 h, 30 Hz). After grinding, the reaction mixture was quenched with 1 M HCl, extracted with ethyl acetate (30 mL $\times$ 3), washed with saturated aqueous Na<sub>2</sub>CO<sub>3</sub>, and dried over MgSO<sub>4</sub>. After the removal of the solvents under reduced pressure, the resulting crude mixture was analyzed by <sup>1</sup>H NMR with dibromomethane as an internal standard to determine the NMR yield of 3,5-difluoro-1,1'-biphenyl (**10**, 95% yield, 95% D).



## 6. Details of Solution-based Reactions

### Solution-based reaction without activation of manganese

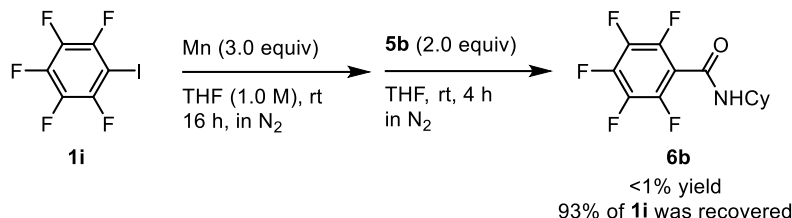

An oven-dried reaction vial was charged with manganese powder (3.0 equiv) in air. After the vial was sealed with a screw cap containing a Teflon®-coated rubber septum, the vial was connected to a vacuum/nitrogen manifold through a needle. It was evacuated and then backfilled with nitrogen. This cycle was repeated three times. THF (1.0 mL) was added to the vial via syringe. **1i** was then added dropwise and the reaction mixture was stirred for 16 h. After 16 h, cyclohexyl isocyanate (**5b**, 249.8 mg, 2.0 mmol) was added to the reaction mixture. The reaction mixture was stirred at room temperature for 16 h followed by quenching with 1M HCl. The aqueous layer was extracted with ethyl acetate (30 mL×3). The combined organic phases were dried over MgSO<sub>4</sub>, the solvent was removed in vacuo. The resulting crude mixture was analyzed by <sup>19</sup>F NMR with fluorobenzene as internal standards to determine the NMR yield of **6b** and the conversion of **1i**.

### Solution-based reaction under the conditions reported by P. Knochel *et al.*

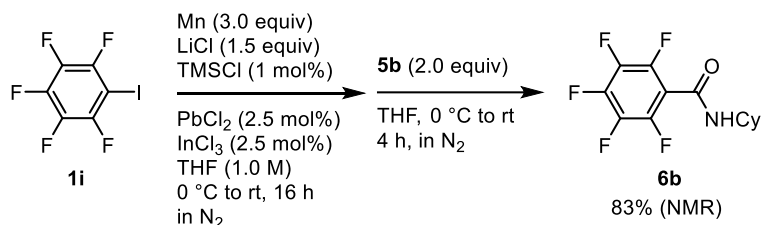

The reaction was conducted according to the reported procedure.<sup>[5]</sup> Mn powder ( $\geq 99.9\%$ , product No. 463728, purchased from Aldrich), LiCl (99.9%, product No. 125-03322, purchased from Wako), PbCl<sub>2</sub> (−10 mesh, 99.999%, product No. 203440, purchased from Aldrich) and InCl<sub>3</sub> (99.999%, product No. 203440, purchased from Aldrich) were used for this reaction. An oven-dried reaction vial was charged with manganese powder (3.0 equiv), LiCl (1.5 equiv), InCl<sub>3</sub> (2.5 mol %) and PbCl<sub>2</sub> (2.5 mol %) in a glovebox under argon atmosphere. After the reaction vial was removed from the glove box, the mixture was dried for 5 min with a heat gun under high vacuum. The vial was then evacuated and backfilled with nitrogen three times and THF (4.0 mL) and TMSCl (1 mol%) were added to the mixture via syringe. **1i** (579.5 mg, 2.0 mmol) was then added dropwise at 0 °C and the reaction mixture was stirred for 16 h to give the solution of arylmanganese(II) iodide. This solution was added to a THF solution of cyclohexyl isocyanate (**5b**, 249.4 mg, 2.0 mmol, 1.3 M) at 0 °C. The reaction mixture was

allowed to warm to room temperature and continuously stirred for 4 h, followed by quenching with brine. The aqueous layer was extracted with  $\text{CH}_2\text{Cl}_2$  (30 mL $\times$ 3). The combined organic phases were dried over  $\text{MgSO}_4$ , the solvent was removed in vacuo. The resulting crude mixture was analyzed by  $^{19}\text{F}$  NMR with fluorobenzene as an internal standard to determine the NMR yield of **6b**.

## **7. Sample Preparation for XPS Analysis**

X-Ray photoelectron spectroscopy (XPS) was used to analyze the surface of manganese metals. The ball-milled sample was prepared via the following conditions: Manganese powder (160 mg) was placed in a milling jar (5 mL) with a ball (10 mm, diameter) under atmospheric conditions. After the jar was closed without purging with inert gas, the jar was placed in the ball mill (Retsch MM 400, 1.5 h, 30 Hz). After ball milling, the jar was opened in a glove box, and the ball-milled sample was transferred to the vessel for XPS analysis.

## 8. Characterization of Products

### 1-(Perfluorophenyl)octan-1-ol (**3i**).

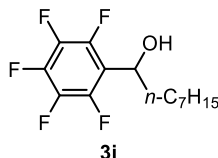

The first metalation step was conducted with **1i** (293.7 mg, 1.0 mmol) and MTBE (236  $\mu$ L, 2.0 mmol) for 1.5 h and the second addition step was conducted with **2a** (246.5 mg, 1.9 mmol) for 0.5 h. The product **3i** was purified by flash column chromatography (SiO<sub>2</sub>, hexane/ethyl acetate, 100:0 to 90:10) and GPC. The product **3i** was obtained in 54% yield (160.7 mg, 0.54 mmol) as a white solid.

<sup>1</sup>H NMR (399 MHz, CDCl<sub>3</sub>,  $\delta$ ): 0.88 (t,  $J$  = 6.6 Hz, 3H), 1.17–1.37 (m, 9H), 1.39–1.50 (m, 1H), 1.77–1.88 (m, 1H), 1.96–2.06 (m, 1H), 2.10 (d,  $J$  = 7.6 Hz, 1H), 5.04 (q,  $J$  = 7.6 Hz, 1H). <sup>13</sup>C NMR (100 MHz, CDCl<sub>3</sub>,  $\delta$ ): 14.1 (CH<sub>3</sub>), 22.7 (CH<sub>2</sub>), 26.0 (CH<sub>2</sub>), 29.26 (CH<sub>2</sub>), 29.31 (CH<sub>2</sub>), 31.9 (CH<sub>2</sub>), 36.9 (CH<sub>2</sub>), 66.5 (CH), 117.3 (t,  $J_{C-F}$  = 15.3 Hz, C), 137.6 (dm,  $J_{C-F}$  = 252.0 Hz, C), 140.6 (dm,  $J_{C-F}$  = 254.0 Hz, C), 144.8 (dm,  $J_{C-F}$  = 247.3 Hz, C). <sup>19</sup>F NMR (375 MHz, CDCl<sub>3</sub>,  $\delta$ ): –162.8 (t,  $J$  = 23.1 Hz, 2F), –156.4 (d,  $J$  = 23.3 Hz, 1F), –145.0 (t,  $J$  = 22.9 Hz, 2F). HRMS-EI ( $m/z$ ): [M]<sup>+</sup> calcd for C<sub>14</sub>H<sub>17</sub>F<sub>5</sub>O, 296.1200; found, 296.1198.

### 1-(2,6-Difluorophenyl)octan-1-ol (**3j**).

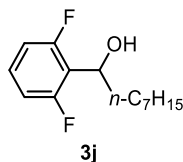

The first metalation step was conducted with **1j** (240.5 mg, 1.0 mmol) and THF (165  $\mu$ L, 2.0 mmol) for 3 h and the second addition step was conducted with **2a** (255.9 mg, 2.0 mmol) for 0.5 h. The product **3j** was purified by flash column chromatography (SiO<sub>2</sub>, hexane/ethyl acetate, 100:0 to 90:10) and GPC. The product **3j** was obtained in 67% yield (96.6 mg, 0.68 mmol) as colorless oil.

<sup>1</sup>H NMR (399 MHz, CDCl<sub>3</sub>,  $\delta$ ): 0.87 (t,  $J$  = 6.8 Hz, 3H), 1.18–1.36 (m, 9H), 1.39–1.51 (m, 1H), 1.77–1.88 (m, 1H), 1.94–2.05 (m, 1H), 2.17 (dt,  $J$  = 2.4, 9.0 Hz, 1H), 5.03 (q,  $J$  = 7.8 Hz, 1H), 6.83–6.92 (m, 2H), 7.16–7.25 (m, 1H). <sup>13</sup>C NMR (100 MHz, CDCl<sub>3</sub>,  $\delta$ ): 14.2 (CH<sub>3</sub>), 22.7 (CH<sub>2</sub>), 26.0 (CH<sub>2</sub>), 29.3 (CH<sub>2</sub>), 29.4 (CH<sub>2</sub>), 31.9 (CH<sub>2</sub>), 37.4 (CH<sub>2</sub>), 66.6 (CH), 111.4–112.0 (m, CH), 119.9 (t,  $J_{C-F}$  = 16.7 Hz, C), 128.9 (t,  $J_{C-F}$  = 11.0 Hz, CH), 161.1 (dd,  $J_{C-F}$  = 8.7, 248.0 Hz, C). <sup>19</sup>F NMR (377 MHz, CDCl<sub>3</sub>,  $\delta$ ): –116.5 (s, 2F). HRMS-EI ( $m/z$ ): [M]<sup>+</sup> calcd for C<sub>14</sub>H<sub>20</sub>F<sub>2</sub>O, 242.1482; found, 242.1481.

### 1-(2-Fluorophenyl)octan-1-ol (**3g**).

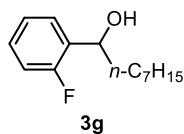

The first metalation step was conducted with **1g** (222.2 mg, 1.0 mmol) and THF (162  $\mu$ L, 2.0 mmol) for 3 h and the second addition step was conducted with **2a** (257.0 mg, 2.0 mmol) for 0.5 h. The product **3g** was purified by flash column chromatography (SiO<sub>2</sub>, hexane/ethyl acetate, 100:0 to 90:10) and GPC. The product **3g** was obtained in 25% yield (55.1 mg, 0.25 mmol) as colorless oil.

<sup>1</sup>H NMR (399 MHz, CDCl<sub>3</sub>,  $\delta$ ): 0.87 (t,  $J$  = 6.8 Hz, 3H), 1.18–1.37 (m, 9H), 1.39–1.50 (m, 1H), 1.69–1.82 (m, 2H), 1.85 (d,  $J$  = 4.8 Hz, 1H), 5.01 (q,  $J$  = 5.9 Hz, 1H), 7.02 (ddd,  $J$  = 1.4, 8.2, 10.4 Hz, 1H), 7.15 (td,  $J$  = 1.1, 7.5 Hz, 1H), 7.21–7.26 (m, 1H), 7.46 (td,  $J$  = 1.9, 7.6 Hz, 1H). <sup>13</sup>C NMR (100 MHz, CDCl<sub>3</sub>,  $\delta$ ): 14.2 (CH<sub>3</sub>), 22.8 (CH<sub>2</sub>), 25.8 (CH<sub>2</sub>), 29.3 (CH<sub>2</sub>), 29.5 (CH<sub>2</sub>), 31.9 (CH<sub>2</sub>), 38.2 (CH<sub>2</sub>), 68.5 (CH), 115.3 (d,  $J_{C-F}$  = 21.9 Hz, CH), 124.3 (d,  $J_{C-F}$  = 2.9 Hz, CH), 127.4 (d,  $J_{C-F}$  = 4.8 Hz, CH), 128.8 (d,  $J_{C-F}$  = 8.7 Hz, CH), 132.0 (d,  $J_{C-F}$  = 13.3 Hz, C), 159.9 (d,  $J_{C-F}$  = 245.2 Hz, C). <sup>19</sup>F NMR (377 MHz, CDCl<sub>3</sub>,  $\delta$ ): –120.8 (s, 1F). HRMS-EI ( $m/z$ ): [M]<sup>+</sup> calcd for C<sub>14</sub>H<sub>21</sub>FO, 224.1576; found, 224.1568.

### (Perfluorophenyl)(phenyl)methanol (**3k**).

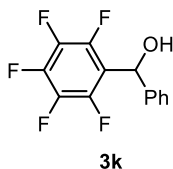

The first metalation step was conducted with **1i** (293.8 mg, 1.0 mmol) and MTBE (236  $\mu$ L, 2.0 mmol) for 1.5 h and the second addition step was conducted with **2b** (215.4 mg, 2.0 mmol) for 0.5 h. The product **3k** was purified by flash column chromatography (SiO<sub>2</sub>, hexane/ethyl acetate, 100:0 to 90:10) and obtained in 60% yield (165.0 mg, 0.60 mmol) as a white solid. <sup>1</sup>H, <sup>13</sup>C, and <sup>19</sup>F NMR of the product **3k** were in agreement with the literature.<sup>[6]</sup>

<sup>1</sup>H NMR (401 MHz, CDCl<sub>3</sub>,  $\delta$ ): 2.64 (d,  $J$  = 8.0 Hz, 1H), 6.25 (d,  $J$  = 8.0 Hz, 1H), 7.30–7.42 (m, 5H). <sup>13</sup>C NMR (100 MHz, CDCl<sub>3</sub>,  $\delta$ ): 67.6 (CH), 117.0 (t,  $J_{C-F}$  = 13.8 Hz, C), 125.4 (CH), 128.3 (CH), 128.8 (CH), 137.7 (dm,  $J_{C-F}$  = 252.7 Hz, C), 140.6 (C), 140.9 (dm,  $J_{C-F}$  = 254.6 Hz, C), 144.7 (dm,  $J_{C-F}$  = 249.8 Hz, C). <sup>19</sup>F NMR (377 MHz, CDCl<sub>3</sub>,  $\delta$ ): –162.4 (t,  $J$  = 23.0 Hz, 2F), –155.5 (d,  $J$  = 34.7 Hz, 1F), –144.0 (t,  $J$  = 23.0 Hz, 2F). HRMS-EI ( $m/z$ ): [M]<sup>+</sup> calcd for C<sub>13</sub>H<sub>7</sub>F<sub>5</sub>O, 274.0417; found, 274.0414.

#### 1-(Perfluorophenyl)cyclohexan-1-ol (**4**).

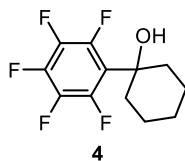

The first metalation step was conducted with **1i** (295.6 mg, 1.0 mmol) and MTBE (236  $\mu$ L, 2.0 mmol) for 1.5 h and the second addition step was conducted with **2c** (117.0 mg, 1.2 mmol) for 0.5 h. The product **4** was purified by flash column chromatography ( $\text{SiO}_2$ , hexane/ethyl acetate, 100:0 to 90:10) and GPC. The product **4** was obtained in 45% yield (120.1 mg, 0.45 mmol) as a white solid.  $^1\text{H}$ ,  $^{13}\text{C}$ , and  $^{19}\text{F}$  NMR of the product **4** were in agreement with the literature.<sup>[6]</sup>

$^1\text{H}$  NMR (392 MHz,  $\text{CDCl}_3$ ,  $\delta$ ): 1.29 (qt,  $J = 3.8, 12.8$  Hz, 1H), 1.56–1.64 (m, 2H), 1.67–1.89 (m, 3H), 1.97–2.09 (m, 4H), 2.42 (t,  $J = 3.4$  Hz, 1H).  $^{13}\text{C}$  NMR (99 MHz,  $\text{CDCl}_3$ ,  $\delta$ ): 21.4 ( $\text{CH}_2$ ), 25.1 ( $\text{CH}_2$ ), 37.2 (t,  $J_{\text{C-F}} = 4.3$  Hz,  $\text{CH}_2$ ), 75.3 (C), 121.3–121.7 (m, C), 137.5 (dm,  $J_{\text{C-F}} = 248.2$  Hz, C), 140.0 (dm,  $J_{\text{C-F}} = 252.0$  Hz, C), 145.1 (dm,  $J_{\text{C-F}} = 248.8$  Hz, C).  $^{19}\text{F}$  NMR (377 MHz,  $\text{CDCl}_3$ ,  $\delta$ ): –162.7 (t,  $J = 23.1$  Hz, 2F), –157.1 (d,  $J = 23.1$  Hz, 1F), –140.7 (t,  $J = 23.1$  Hz, 2F). HRMS-EI ( $m/z$ ):  $[\text{M}]^+$  calcd for  $\text{C}_{12}\text{H}_{11}\text{F}_5\text{O}$ , 266.0730; found, 266.0728.

#### 2,3,4,5,6-Pentafluoro-*N*-phenylbenzamide (**6a**).

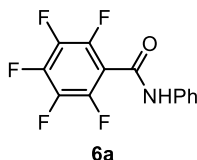

The first metalation step was conducted with **1i** (293.8 mg, 1.0 mmol) and MTBE (236  $\mu$ L, 2.0 mmol) for 1.5 h and the second amidation step was conducted with **5a** (237.4 mg, 2.0 mmol) for 0.5 h. The product **6a** was purified by flash column chromatography ( $\text{SiO}_2$ , hexane/ethyl acetate, 100:0 to 85:15) and obtained in 69% yield (197.0 mg, 0.69 mmol) as a white solid.  $^1\text{H}$  and  $^{19}\text{F}$  NMR of the product **6a** were in agreement with the literature.<sup>[7]</sup>

$^1\text{H}$  NMR (401 MHz,  $\text{DMSO-d}_6$ ,  $\delta$ ): 7.23 (t,  $J = 7.2$  Hz, 1H), 7.41 (t,  $J = 8.0$  Hz, 2H), 7.52 (brs, 1H), 7.61 (d,  $J = 8.8$  Hz, 2H).  $^{13}\text{C}$  NMR (100 MHz,  $\text{CDCl}_3$ ,  $\delta$ ): 112.5 (t,  $J_{\text{C-F}} = 20.5$  Hz, C), 119.6 (CH), 124.8 (CH), 129.1 (CH), 137.1 (dm,  $J_{\text{C-F}} = 253.7$  Hz, C), 138.0 (C), 141.5 (dm,  $J_{\text{C-F}} = 250.9$  Hz, C), 143.2 (dm,  $J_{\text{C-F}} = 251.3$  Hz, C), 154.9 (C).  $^{19}\text{F}$  NMR (375 MHz,  $\text{CDCl}_3$ ,  $\delta$ ): –160.4 (t,  $J = 23.1$  Hz, 2F), –150.6 (t,  $J = 23.3$  Hz, 1F), –140.9 (s, 2F). HRMS-EI ( $m/z$ ):  $[\text{M}]^+$  calcd for  $\text{C}_{13}\text{H}_6\text{F}_5\text{NO}$ , 287.0370; found, 287.0372.

**Ethyl 2',3',4',5',6'-pentafluoro-[1,1'-biphenyl]-4-carboxylate (7).**

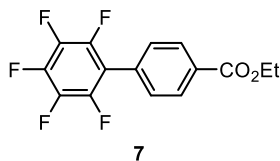

The reaction was conducted with **1i** (293.5 mg, 1.0 mmol) according to the general procedure B. The product **7** was purified by GPC. The product **7** was obtained in 71% yield (224.6 mg, 0.71 mmol) as a white solid.  $^1\text{H}$ ,  $^{13}\text{C}$ , and  $^{19}\text{F}$  NMR of the product **7** were in agreement with the literature.<sup>[8]</sup>

$^1\text{H}$  NMR (401 MHz,  $\text{CDCl}_3$ ,  $\delta$ ): 1.42 (t,  $J = 7.1$  Hz, 3H), 4.42 (q,  $J = 7.0$  Hz, 2H), 7.51 (d,  $J = 8.2$  Hz, 2H), 8.17 (d,  $J = 8.7$  Hz, 2H).  $^{13}\text{C}$  NMR (100 MHz,  $\text{CDCl}_3$ ,  $\delta$ ): 14.2 ( $\text{CH}_3$ ), 61.3 ( $\text{CH}_2$ ), 114.7–115.2 (m, C), 129.7 (CH), 130.2 (CH), 130.7 (C), 131.2 (C), 137.8 (dm,  $J_{\text{C-F}} = 252.2$  Hz, C), 140.7 (dm,  $J_{\text{C-F}} = 254.1$  Hz, C), 144.0 (dm,  $J_{\text{C-F}} = 249.3$  Hz, C), 165.8 (C).  $^{19}\text{F}$  NMR (377 MHz,  $\text{CDCl}_3$ ,  $\delta$ ): –162.2 (t,  $J = 23.1$  Hz, 2F), –154.8 (d,  $J = 34.7$  Hz, 1F), –143.4 (s, 2F). HRMS-EI ( $m/z$ ):  $[\text{M}]^+$  calcd for  $\text{C}_{15}\text{H}_9\text{F}_5\text{O}_2$ , 316.0523; found, 316.0520.

**N-Cyclohexyl-2,3,4,5,6-pentafluorobenzamide (6b).**

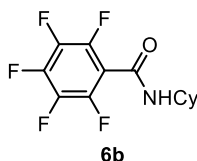

For reaction with **1i**: the first metalation step was conducted with **1i** (293.3 mg, 1.0 mmol) and MTBE (236  $\mu\text{L}$ , 2.0 mmol) for 1.5 h and the second amidation step was conducted with **5b** (246.4 mg, 2.0 mmol) for 0.5 h. The product **6b** was purified by flash column chromatography ( $\text{SiO}_2$ , hexane/ethyl acetate, 100:0 to 80:20) and obtained in 72% yield (210.7 mg, 0.72 mmol) as a white solid.

For the reaction with **1s**: the first metalation step was conducted with **1s** (246.8 mg, 1.0 mmol) and MTBE (236  $\mu\text{L}$ , 2.0 mmol) for 1.5 h and the second arylation step was conducted with **5b** (248.2 mg, 2.0 mmol) for 0.5 h. The product **6b** was purified by flash column chromatography ( $\text{SiO}_2$ , hexane/ethyl acetate, 100:0 to 85:15) and obtained in 57% yield (168.2 mg, 0.57 mmol) as a white solid.

$^1\text{H}$  NMR (392 MHz,  $\text{CDCl}_3$ ,  $\delta$ ): 1.15–1.32 (m, 3H), 1.36–1.49 (m, 2H), 1.61–1.69 (m, 1H), 1.71–1.80 (m, 2H), 1.99–2.09 (m, 2H), 3.94–4.06 (m, 1H), 5.76 (brs, 1H).  $^{13}\text{C}$  NMR (100 MHz,  $\text{CDCl}_3$ ,  $\delta$ ): 24.8 ( $\text{CH}_2$ ), 25.4 ( $\text{CH}_2$ ), 32.7 ( $\text{CH}_2$ ), 49.6 (CH), 112.2 (t,  $J_{\text{C-F}} = 18.6$  Hz, C), 137.6 (dm,  $J_{\text{C-F}} = 255.1$  Hz, C), 142.1 (dm,  $J_{\text{C-F}} = 256.1$  Hz, C), 144.0 (dm,  $J_{\text{C-F}} = 251.7$  Hz, C), 156.5 (C).  $^{19}\text{F}$  NMR (377 MHz,  $\text{CDCl}_3$ ,  $\delta$ ): –161.1 (s, 2F), –152.1 (d,  $J = 23.0$  Hz, 1F), –141.7 (d,  $J = 23.4$  Hz, 2F). HRMS-EI ( $m/z$ ):  $[\text{M}]^+$  calcd for  $\text{C}_{13}\text{H}_{12}\text{F}_5\text{NO}$ , 293.0839; found, 293.0833.

***N*-Cyclohexyl-2,6-difluorobenzamide (6c).**

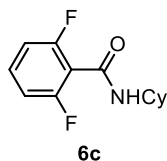

The first metalation step was conducted with **1b** (242.1 mg, 1.0 mmol) and THF (162  $\mu$ L, 2.0 mmol) for 1.5 h and the second amidation step was conducted with **5b** (248.9 mg, 2.0 mmol) for 0.5 h. The product **6c** was purified by flash column chromatography (SiO<sub>2</sub>, hexane/ethyl acetate, 100:0 to 80:20) and obtained in 79% yield (191.1 mg, 0.80 mmol) as a white solid. <sup>1</sup>H, <sup>13</sup>C, and <sup>19</sup>F NMR of the product **6c** were in agreement with the literature.<sup>[9]</sup>

<sup>1</sup>H NMR (392 MHz, CDCl<sub>3</sub>,  $\delta$ ): 1.18–1.32 (m, 3H), 1.36–1.50 (m, 2H), 1.59–1.69 (m, 1H), 1.70–1.80 (m, 2H), 2.01–2.10 (m, 2H), 3.97–4.07 (m, 1H), 5.77 (brs, 1H), 6.90–6.98 (m, 2H), 7.30–7.39 (m, 1H). <sup>13</sup>C NMR (100 MHz, CDCl<sub>3</sub>,  $\delta$ ): 24.8 (CH<sub>2</sub>), 25.6 (CH<sub>2</sub>), 33.0 (CH<sub>2</sub>), 49.0 (CH), 111.9–112.1 (m, CH), 114.9 (t,  $J_{C-F}$  = 20.5 Hz, C), 131.5 (t,  $J_{C-F}$  = 10.1 Hz, CH), 159.5 (C), 160.0 (dd,  $J_{C-F}$  = 6.7, 251.7 Hz, C). <sup>19</sup>F NMR (377 MHz, CDCl<sub>3</sub>,  $\delta$ ): –113.6 (s, 2F). HRMS-EI ( $m/z$ ): [M]<sup>+</sup> calcd for C<sub>13</sub>H<sub>15</sub>F<sub>2</sub>NO, 239.1122; found, 239.1120.

***N*-Cyclohexyl-3,5-difluoro-[1,1'-biphenyl]-4-carboxamide (6d).**

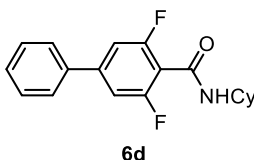

The first metalation step was conducted with **1k** (316.3 mg, 1.0 mmol) and THF (162  $\mu$ L, 2.0 mmol) for 3 h and the second amidation step was conducted with **5b** (247.6 mg, 2.0 mmol) for 0.5 h. The product **6d** was purified by flash column chromatography (SiO<sub>2</sub>, CH<sub>2</sub>Cl<sub>2</sub>) and the obtained solid was washed with hexane. The product **6d** was obtained in 71% yield (224.0 mg, 0.71 mmol) as a white solid.

<sup>1</sup>H NMR (401 MHz, CDCl<sub>3</sub>,  $\delta$ ): 1.16–1.34 (m, 3H), 1.38–1.50 (m, 2H), 1.60–1.69 (m, 1H), 1.71–1.81 (m, 2H), 2.02–2.13 (m, 2H), 3.98–4.10 (m, 1H), 5.84 (brs, 1H), 7.14–7.20 (m, 2H), 7.40–7.50 (m, 3H), 7.52–7.57 (m, 2H). <sup>13</sup>C NMR (100 MHz, DMSO-*d*<sub>6</sub>,  $\delta$ ): 24.5 (CH<sub>2</sub>), 25.2 (CH<sub>2</sub>), 32.2 (CH<sub>2</sub>), 48.3 (CH), 109.8 (d,  $J_{C-F}$  = 24.8 Hz, CH), 114.4 (t,  $J_{C-F}$  = 6.2 Hz, C), 126.9 (CH), 128.9 (CH), 129.1 (CH), 137.2 (CH), 143.3 (t,  $J_{C-F}$  = 9.6 Hz, C), 158.5 (C), 159.2 (dd,  $J_{C-F}$  = 9.0, 247.5 Hz, C). <sup>19</sup>F NMR (377 MHz, CDCl<sub>3</sub>,  $\delta$ ): –113.1 (s, 2F). HRMS-EI ( $m/z$ ): [M]<sup>+</sup> calcd for C<sub>19</sub>H<sub>19</sub>F<sub>2</sub>NO, 315.1435; found, 315.1430.



***N*-Cyclohexyl-2-fluorobenzamide (6e).**

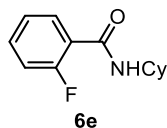

The first metalation step was conducted with **1g** (221.3 mg, 1.0 mmol) and 1,2-dimethoxyethane (207  $\mu$ L, 2.0 mmol) for 3 h and the second amidation step was conducted with **5b** (253  $\mu$ L, 2.0 mmol) for 0.5 h. The product **6e** was purified by flash column chromatography (SiO<sub>2</sub>, hexane/ethyl acetate, 100:0 to 80:20) and obtained in 38% yield (84.1 mg, 0.38 mmol) as a white solid. <sup>1</sup>H, <sup>13</sup>C, and <sup>19</sup>F NMR of the product **6e** were in agreement with the literature.<sup>[10]</sup>

<sup>1</sup>H NMR (401 MHz, CDCl<sub>3</sub>,  $\delta$ ): 1.18–1.34 (m, 3H), 1.38–1.51 (m, 2H), 1.60–1.69 (m, 1H), 1.71–1.80 (m, 2H), 1.98–2.09 (m, 2H), 3.96–4.09 (m, 1H), 6.62 (brs, 1H), 7.10 (dd,  $J$  = 8.6, 11.4 Hz, 1H), 7.22–7.29 (m, 1H), 7.40–7.50 (m, 1H), 8.09 (dt,  $J$  = 3.9, 11.3 Hz, 1H). <sup>13</sup>C NMR (100 MHz, CDCl<sub>3</sub>,  $\delta$ ): 24.8 (CH<sub>2</sub>), 25.6 (CH<sub>2</sub>), 33.0 (CH<sub>2</sub>), 48.6 (CH), 115.9 (d,  $J_{C-F}$  = 24.8 Hz, CH), 121.6 (d,  $J_{C-F}$  = 12.3 Hz, C), 124.7 (d,  $J_{C-F}$  = 2.8 Hz, CH), 132.0 (CH), 133.0 (d,  $J_{C-F}$  = 8.7 Hz, CH), 160.5 (d,  $J_{C-F}$  = 247.0 Hz, C), 162.3 (d,  $J_{C-F}$  = 2.9 Hz, C). <sup>19</sup>F NMR (377 MHz, CDCl<sub>3</sub>,  $\delta$ ): –114.9 (s, 1F). HRMS-EI ( $m/z$ ): [M]<sup>+</sup> calcd for C<sub>13</sub>H<sub>16</sub>FNO, 221.1216; found, 221.1216.

***N*-Cyclohexyl-2,3,5,6-tetrafluoro-4-methoxybenzamide (6f).**

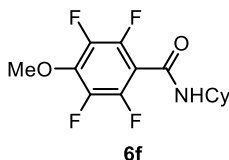

The first metalation step was conducted with **1i** (308.7 mg, 1.0 mmol) and THF (162  $\mu$ L, 2.0 mmol) for 1.5 h and the second amidation step was conducted with **5b** (249.4 mg, 2.0 mmol) for 0.5 h. The product **6f** was purified by flash column chromatography (SiO<sub>2</sub>, hexane/ethyl acetate, 100:0 to 80:20) and obtained in 70% yield (215.2 mg, 0.70 mmol) as a white solid.

<sup>1</sup>H NMR (401 MHz, CDCl<sub>3</sub>,  $\delta$ ): 1.18–1.30 (m, 3H), 1.36–1.49 (m, 2H), 1.60–1.68 (m, 1H), 1.70–1.79 (m, 2H), 1.98–2.09 (m, 2H), 3.94–4.04 (m, 1H), 4.10–4.12 (m, 3H), 5.77 (brs, 1H). <sup>13</sup>C NMR (100 MHz, CDCl<sub>3</sub>,  $\delta$ ): 24.7 (CH<sub>2</sub>), 25.4 (CH<sub>2</sub>), 32.5 (CH<sub>2</sub>), 49.3 (CH), 62.0 (t,  $J_{C-F}$  = 3.8 Hz, CH<sub>3</sub>), 110.0 (t,  $J_{C-F}$  = 19.6 Hz, C), 138.9–139.5 (m, C), 140.4 (dm,  $J_{C-F}$  = 239.9 Hz, C), 143.9 (dm,  $J_{C-F}$  = 249.8 Hz, C), 157.3 (C). <sup>19</sup>F NMR (377 MHz, CDCl<sub>3</sub>,  $\delta$ ): –157.9 (s, 2F), –143.6 (d,  $J$  = 23.4 Hz, 2F). HRMS-EI ( $m/z$ ): [M]<sup>+</sup> calcd for C<sub>14</sub>H<sub>15</sub>F<sub>4</sub>NO<sub>2</sub>, 305.1039; found, 305.1039.

***N*-Cyclohexyl-4-(dimethylamino)-2,3,5,6-tetrafluorobenzamide (6g).**

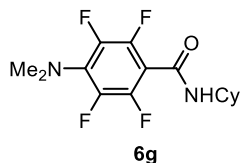

The first metalation step was conducted with **1m** (318.1 mg, 1.0 mmol) and THF (162  $\mu$ L, 2.0 mmol) for 1.5 h and the second amidation step was conducted with **5b** (249.2 mg, 2.0 mmol) for 0.5 h. The product **6g** was purified by flash column chromatography (SiO<sub>2</sub>, hexane/ethyl acetate, 100:0 to 80:20) and obtained in 69% yield (220.5 mg, 0.69 mmol) as a white solid.

<sup>1</sup>H NMR (401 MHz, CDCl<sub>3</sub>,  $\delta$ ): 1.16–1.30 (m, 3H), 1.35–1.48 (m, 2H), 1.59–1.68 (m, 1H), 1.69–1.79 (m, 2H), 1.98–2.08 (m, 2H), 2.99 (t,  $J$  = 2.2 Hz, 6H), 3.93–4.05 (m, 1H), 5.78 (brs, 1H). <sup>13</sup>C NMR (100 MHz, CDCl<sub>3</sub>,  $\delta$ ): 24.8 (CH<sub>2</sub>), 25.5 (CH<sub>2</sub>), 32.8 (CH<sub>2</sub>), 43.1 (t,  $J_{C-F}$  = 4.3 Hz, CH<sub>3</sub>), 49.1 (CH), 107.1 (t,  $J_{C-F}$  = 18.1 Hz, C), 132.9 (t,  $J_{C-F}$  = 8.6 Hz, C), 141.2 (dm,  $J_{C-F}$  = 244.1 Hz, C), 144.8 (dm,  $J_{C-F}$  = 245.1 Hz, C), 158.0 (C). <sup>19</sup>F NMR (377 MHz, CDCl<sub>3</sub>,  $\delta$ ): –152.5 (d,  $J$  = 23.0 Hz, 2F), –144.6 (s, 2F). HRMS-EI ( $m/z$ ): [M]<sup>+</sup> calcd for C<sub>15</sub>H<sub>18</sub>F<sub>4</sub>N<sub>2</sub>O<sub>1</sub>, 318.1355; found, 318.1346.

**4-[(*tert*-Butyldimethylsilyl)oxy]-*N*-cyclohexyl-2,3,5,6-tetrafluorobenzamide (6h).**

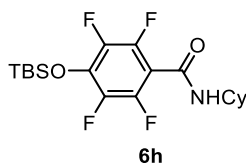

The first metalation step was conducted with **1n** (406.6 mg, 1.0 mmol) and THF (162  $\mu$ L, 2.0 mmol) for 90 min and the second amidation step was conducted with **5b** (248.7 mg, 2.0 mmol) for 30 min. The product **6h** was purified by flash column chromatography (SiO<sub>2</sub>, hexane/ethyl acetate, 100:0 to 80:20) and obtained in 28% yield (113.4 mg, 0.28 mmol) as a white solid.

<sup>1</sup>H NMR (401 MHz, CDCl<sub>3</sub>,  $\delta$ ): 0.23 (s, 6H), 1.01 (s, 9H), 1.15–1.31 (m, 3H), 1.36–1.49 (m, 2H), 1.60–1.68 (m, 1H), 1.70–1.79 (m, 2H), 2.00–2.08 (m, 2H), 3.94–4.06 (m, 1H), 5.78 (brs, 1H). <sup>13</sup>C NMR (100 MHz, CDCl<sub>3</sub>,  $\delta$ ): –4.9 (CH<sub>3</sub>), 18.5 (C), 24.8 (CH<sub>2</sub>), 25.3 (CH<sub>3</sub>), 25.5 (CH<sub>2</sub>), 32.8 (CH<sub>2</sub>), 49.3 (CH), 108.6 (t,  $J_{C-F}$  = 18.6 Hz, C), 136.1–136.5 (m, C), 140.7 (dm,  $J_{C-F}$  = 248.4 Hz, C), 144.3 (dm,  $J_{C-F}$  = 251.7 Hz, C), 157.7 (C). <sup>19</sup>F NMR (377 MHz, CDCl<sub>3</sub>,  $\delta$ ): –157.6 (d,  $J$  = 23.0 Hz, 2F), –144.4 (s, 2F). HRMS-EI ( $m/z$ ): [M]<sup>+</sup> calcd for C<sub>19</sub>H<sub>27</sub>F<sub>4</sub>NO<sub>2</sub>Si, 405.1747; found, 405.1740.

#### 4-Bromo-*N*-cyclohexyl-2,6-difluorobenzamide (**6i**).

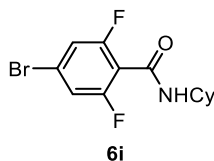

The first step was conducted with **1o** (319.1 mg, 1.0 mmol) and THF (162  $\mu$ L, 2.0 mmol) for 1.5 h and the second amidation step was conducted with **5b** (247.6 mg, 2.0 mmol) for 0.5 h. The product **6i** was purified by flash column chromatography (SiO<sub>2</sub>, hexane/ethyl acetate, 100:0 to 80:20) and obtained in 75% yield (237.9 mg, 0.75 mmol) as a white solid.

<sup>1</sup>H NMR (401 MHz, CDCl<sub>3</sub>,  $\delta$ ): 1.14–1.30 (m, 3H), 1.35–1.49 (m, 2H), 1.60–1.69 (m, 1H), 1.70–1.79 (m, 2H), 1.98–2.10 (m, 2H), 3.93–4.06 (m, 1H), 5.73 (brs, 1H), 7.11–7.17 (m, 2H). <sup>13</sup>C NMR (100 MHz, CDCl<sub>3</sub>,  $\delta$ ): 24.8 (CH<sub>2</sub>), 25.5 (CH<sub>2</sub>), 32.9 (CH<sub>2</sub>), 49.1 (CH), 114.2 (t,  $J_{C-F}$  = 21.0 Hz, C), 116.0 (d,  $J_{C-F}$  = 28.6 Hz, CH), 123.8 (t,  $J_{C-F}$  = 11.9 Hz, C), 158.6 (C), 159.8 (dd,  $J_{C-F}$  = 8.6, 255.6 Hz, C). <sup>19</sup>F NMR (377 MHz, CDCl<sub>3</sub>,  $\delta$ ): –111.7 (s, 2F). HRMS-ESI ( $m/z$ ): [M+Na]<sup>+</sup> calcd for C<sub>13</sub>H<sub>14</sub>BrF<sub>2</sub>NONa, 340.0119; found, 340.0122.

#### 2,6-Dichloro-*N*-cyclohexylbenzamide (**6j**).

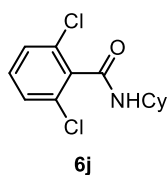

The first metalation step was conducted with **1p** (273.3 mg, 1.0 mmol) and THF (162  $\mu$ L, 2.0 mmol) for 1.5 h and the second amidation step was conducted with **5b** (248.5 mg, 2.0 mmol) for 0.5 h. The product **6j** was purified by flash column chromatography (SiO<sub>2</sub>, hexane/ethyl acetate, 100:0 to 80:20) and obtained in 55% yield (149.4 mg, 0.55 mmol) as a white solid.

<sup>1</sup>H NMR (401 MHz, CDCl<sub>3</sub>,  $\delta$ ): 1.13–1.33 (m, 3H), 1.37–1.51 (m, 2H), 1.61–1.69 (m, 1H), 1.71–1.82 (m, 2H), 2.01–2.16 (m, 2H), 3.98–4.12 (m, 1H), 5.60 (brs, 1H), 7.21–7.26 (m, 1H), 7.29–7.33 (m, 2H). <sup>13</sup>C NMR (100 MHz, CDCl<sub>3</sub>,  $\delta$ ): 24.8 (CH<sub>2</sub>), 25.4 (CH<sub>2</sub>), 32.6 (CH<sub>2</sub>), 48.7 (CH), 127.8 (CH), 130.3 (CH), 132.1 (C), 136.2 (C), 163.4 (C). HRMS-EI ( $m/z$ ): [M]<sup>+</sup> calcd for C<sub>13</sub>H<sub>15</sub>Cl<sub>2</sub>NO, 271.0531; found, 271.0531.

### 2-Bromo-*N*-cyclohexyl-6-fluorobenzamide (**6k**).

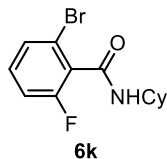

The first metalation step was conducted with **1q** (299.0 mg, 1.0 mmol) and THF (162  $\mu$ L, 2.0 mmol) for 1.5 h and the second amidation step was conducted with **5b** (249.7 mg, 2.0 mmol) for 0.5 h. The product **6k** was purified by flash column chromatography (SiO<sub>2</sub>, hexane/ethyl acetate, 100:0 to 80:20) and obtained in 69% yield (208.4 mg, 0.69 mmol) as a white solid.

<sup>1</sup>H NMR (401 MHz, CDCl<sub>3</sub>,  $\delta$ ): 1.13–1.32 (m, 3H), 1.37–1.50 (m, 2H), 1.60–1.69 (m, 1H), 1.71–1.81 (m, 2H), 2.04–2.15 (m, 2H), 3.97–4.10 (m, 1H), 5.64 (brs, 1H), 7.07 (td,  $J$  = 0.8, 8.6 Hz, 1H), 7.23 (td,  $J$  = 5.9, 8.2 Hz, 1H), 7.37 (d,  $J$  = 8.0 Hz, 1H). <sup>13</sup>C NMR (100 MHz, CDCl<sub>3</sub>,  $\delta$ ): 24.9 (CH<sub>2</sub>), 25.5 (CH<sub>2</sub>), 32.7 (CH<sub>2</sub>), 48.9 (CH), 114.9 (d,  $J_{C-F}$  = 22.0 Hz, CH), 120.6 (d,  $J_{C-F}$  = 4.8 Hz, C), 127.8 (d,  $J_{C-F}$  = 21.9 Hz, C), 128.5 (d,  $J_{C-F}$  = 3.8 Hz, CH), 131.1 (d,  $J_{C-F}$  = 8.6 Hz, CH), 159.2 (d,  $J_{C-F}$  = 251.7 Hz, C), 162.4 (C). <sup>19</sup>F NMR (377 MHz, CDCl<sub>3</sub>,  $\delta$ ): –113.4 (s, 1F). HRMS-EI ( $m/z$ ): [M]<sup>+</sup> calcd for C<sub>13</sub>H<sub>15</sub>BrFNO, 299.0321; found, 299.0313.

### 2,6-Dibromo-*N*-cyclohexylbenzamide (**6m**).

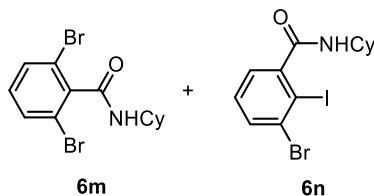

The first metalation step was conducted with **1r** (361.7 mg, 1.0 mmol) and THF (162  $\mu$ L, 2.0 mmol) for 1.5 h and the second amidation step was conducted with **5b** (249.7 mg, 2.0 mmol) for 0.5 h. The product **6m** and the byproduct **6n** were obtained in 54% NMR yield (**6m**:**6n** = 78:22).

<sup>1</sup>H NMR for **6m** (401 MHz, CDCl<sub>3</sub>,  $\delta$ ): 1.14–1.34 (m, 3H), 1.37–1.51 (m, 2H), 1.60–1.69 (m, 1H), 1.72–1.82 (m, 2H), 2.03–2.17 (m, 2H), 3.98–4.11 (m, 1H), 5.56 (brs, 1H), 7.09 (t,  $J$  = 8.0 Hz, 1H), 7.52 (d,  $J$  = 7.6 Hz, 2H). <sup>13</sup>C NMR for **6m** (100 MHz, CDCl<sub>3</sub>,  $\delta$ ): 24.9 (CH<sub>2</sub>), 25.6 (CH<sub>2</sub>), 32.8 (CH<sub>2</sub>), 48.8 (CH), 120.5 (C), 131.2 (CH), 131.8 (CH), 140.0 (C), 165.3 (C). HRMS-EI ( $m/z$ ): [M]<sup>+</sup> calcd for C<sub>13</sub>H<sub>15</sub>Br<sub>2</sub>NO, 358.9520; found, 358.9517.

***N*-Cyclohexyl-2,3,5,6-tetrafluoro-4-(trifluoromethyl)benzamide (6o).**

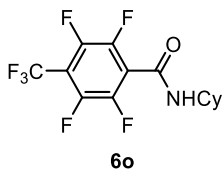

The first step was conducted with **1t** (296.2 mg, 1.0 mmol) and MTBE (236  $\mu$ L, 2.0 mmol) for 1.5 h and the second amidation step was conducted with **5b** (249.2 mg, 2.0 mmol) for 0.5 h. The product **6o** was purified by flash column chromatography (SiO<sub>2</sub>, hexane/ethyl acetate, 100:0 to 80:20) and obtained in 69% yield (235.1 mg, 0.68 mmol) as a white solid.

<sup>1</sup>H NMR (401 MHz, CDCl<sub>3</sub>,  $\delta$ ): 1.18–1.32 (m, 3H), 1.37–1.50 (m, 2H), 1.62–1.70 (m, 1H), 1.72–1.80 (m, 2H), 1.99–2.10 (m, 2H), 3.95–4.07 (m, 1H), 5.80 (brs, 1H). <sup>13</sup>C NMR (100 MHz, DMSO-*d*<sub>6</sub>,  $\delta$ ): 24.2 (CH<sub>2</sub>), 25.1 (CH<sub>2</sub>), 32.0 (CH<sub>2</sub>), 48.7 (CH), 108.0–109.3 (m, C), 120.4 (d, *J*<sub>C-F</sub> = 229.8 Hz, C), 121.9 (d, *J*<sub>C-F</sub> = 21.9 Hz, C), 143.3 (dm, *J*<sub>C-F</sub> = 262.3 Hz, C), 155.1 (C). <sup>19</sup>F NMR (377 MHz, CDCl<sub>3</sub>,  $\delta$ ): –139.1 (s, 2F), –138.5 (q, *J* = 23.1 Hz, 2F), –56.6 (t, *J* = 23.2 Hz, 3F). HRMS-EI (*m/z*): [M]<sup>+</sup> calcd for C<sub>14</sub>H<sub>12</sub>F<sub>7</sub>NO, 343.0807; found, 343.0799.

***N*-Cyclohexyl-2,3,5,6-tetrafluorobenzamide (6p).**

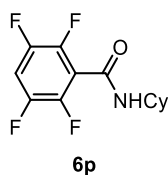

The first metalation step was conducted with **1u** (229.1 mg, 1.0 mmol) and THF (162  $\mu$ L, 2.0 mmol) for 90 min and the second amidation step was conducted with **5b** (249.7 mg, 2.0 mmol) for 30 min. The product **6p** was purified by flash column chromatography (SiO<sub>2</sub>, hexane/ethyl acetate, 100:0 to 80:20) and obtained in 45% yield (124.6 mg, 0.45 mmol) as a white solid.

<sup>1</sup>H NMR (392 MHz, CDCl<sub>3</sub>,  $\delta$ ): 1.14–1.32 (m, 3H), 1.36–1.49 (m, 2H), 1.61–1.70 (m, 1H), 1.71–1.81 (m, 2H), 2.01–2.11 (m, 2H), 3.96–4.07 (m, 1H), 5.77 (brs, 1H), 7.07–7.17 (m, 1H). <sup>13</sup>C NMR (100 MHz, CDCl<sub>3</sub>,  $\delta$ ): 24.8 (CH<sub>2</sub>), 25.5 (CH<sub>2</sub>), 32.8 (CH<sub>2</sub>), 49.4 (CH), 107.2 (t, *J*<sub>C-F</sub> = 22.4 Hz, CH), 117.7 (t, *J*<sub>C-F</sub> = 19.1 Hz, C), 144.6 (dm, *J*<sub>C-F</sub> = 495.4 Hz, C), 144.5–145.0 (m, C), 157.3 (C). <sup>19</sup>F NMR (377 MHz, CDCl<sub>3</sub>,  $\delta$ ): –142.5 (s, 2F), –138.3 (s, 2F). HRMS-EI (*m/z*): [M]<sup>+</sup> calcd for C<sub>13</sub>H<sub>13</sub>F<sub>4</sub>NO, 275.0933; found, 275.0932.

***N*-Cyclohexyl-2,4,6-trifluorobenzamide (6q).**

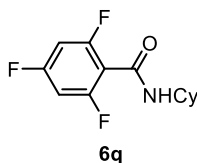

The first metalation step was conducted with **1v** (211.4 mg, 1.0 mmol) and THF (162  $\mu$ L, 2.0 mmol) for 3 h and the second amidation step was conducted with **5b** (250.4 mg, 2.0 mmol) for 0.5 h. The product **6q** was purified by flash column chromatography (SiO<sub>2</sub>, hexane/ethyl acetate, 100:0 to 85:15) and obtained in 39% yield (101.4 mg, 0.39 mmol) as a white solid.

<sup>1</sup>H NMR (401 MHz, CDCl<sub>3</sub>,  $\delta$ ): 1.14–1.32 (m, 3H), 1.35–1.49 (m, 2H), 1.60–1.69 (m, 1H), 1.70–1.80 (m, 2H), 1.99–2.09 (m, 2H), 3.94–4.05 (m, 1H), 5.74 (brs, 1H), 6.66–6.75 (m, 2H). <sup>13</sup>C NMR (100 MHz, CDCl<sub>3</sub>,  $\delta$ ): 24.8 (CH<sub>2</sub>), 25.5 (CH<sub>2</sub>), 32.8 (CH<sub>2</sub>), 49.1 (CH), 100.7 (td,  $J_{C-F}$  = 3.5, 26.2 Hz, CH), 111.7 (td,  $J_{C-F}$  = 4.1, 21.2 Hz, C), 158.7 (C), 160.4 (ddd,  $J_{C-F}$  = 9.8, 15.1, 253.0 Hz, C), 163.2 (dt,  $J_{C-F}$  = 15.3, 252.7 Hz, C). <sup>19</sup>F NMR (377 MHz, CDCl<sub>3</sub>,  $\delta$ ): –110.1 (s, 2F), –105.4 (s, 1F). HRMS-EI (m/z): [M]<sup>+</sup> calcd for C<sub>13</sub>H<sub>14</sub>F<sub>3</sub>NO, 257.1028; found, 257.1025.

## 9. References

1. Y.-H. Han, T. Zhou, Y. Sui, R. Hua, *Org. Process Res. Dev.* **2014**, *18*, 1229–1233.
2. S. Yamada, M. Morita, T. Agou, T. Kubota, T. Ichikawa, T. Konno, *Org. Biomol. Chem.* **2018**, *16*, 5609–5617.
3. H. Umezawa, S. Okada, H. Oikawa, H. Matsuda, H. Nakanishi, *Bull. Chem. Soc. Jpn.* **2007**, *80*, 1413–1417.
4. (a) D. W. Bruce, P. Metrangolo, F. Meyer, T. Pilati, C. Präsang, G. Resnati, G. Terraneo, S. G. Wainwright, A. C. Whitwood, *Chem. Eur. J.* **2010**, *16*, 9511–9524. (b) X.-K. Zhang, F. Liu, W. D. Fiers, W.-M. Sun, J. Guo, Z. Liu, C. C. Aldrich, *J. Org. Chem.* **2017**, *82*, 3432–3440.
5. Z. Peng, P. Knochel, *Org. Lett.* **2011**, *13*, 3198–3201.
6. Z. Liu, G. K. Kole, Y. P. Budiman, Y.-M. Tian, A. Friedrich, X. Luo, S. A. Westcott, U. Radius, T. B. Marder, *Angew. Chem., Int. Ed.* **2021**, *60*, 16529–16538.
7. M. Giese, M. Albrecht, T. Krappitz, M. Peters, V. Gossen, G. Raabe, A. Valkonenb, K. Rissanen, *Chem. Commun.* **2012**, *48*, 9983–9985.
8. M. Ohashi, R. Doi, S. Ogoshi, *Chem. Eur. J.* **2014**, *20*, 2040–2048.
9. Y. Liang, X. Zhang, D. W. C. MacMillan, *Nature* **2018**, *559*, 83–88.
10. J. Nandi, M. Z. Vaughan, A. L. Sandoval, J. M. Paolillo, N. E. Leadbeater, *J. Org. Chem.* **2020**, *85*, 9219–9229.

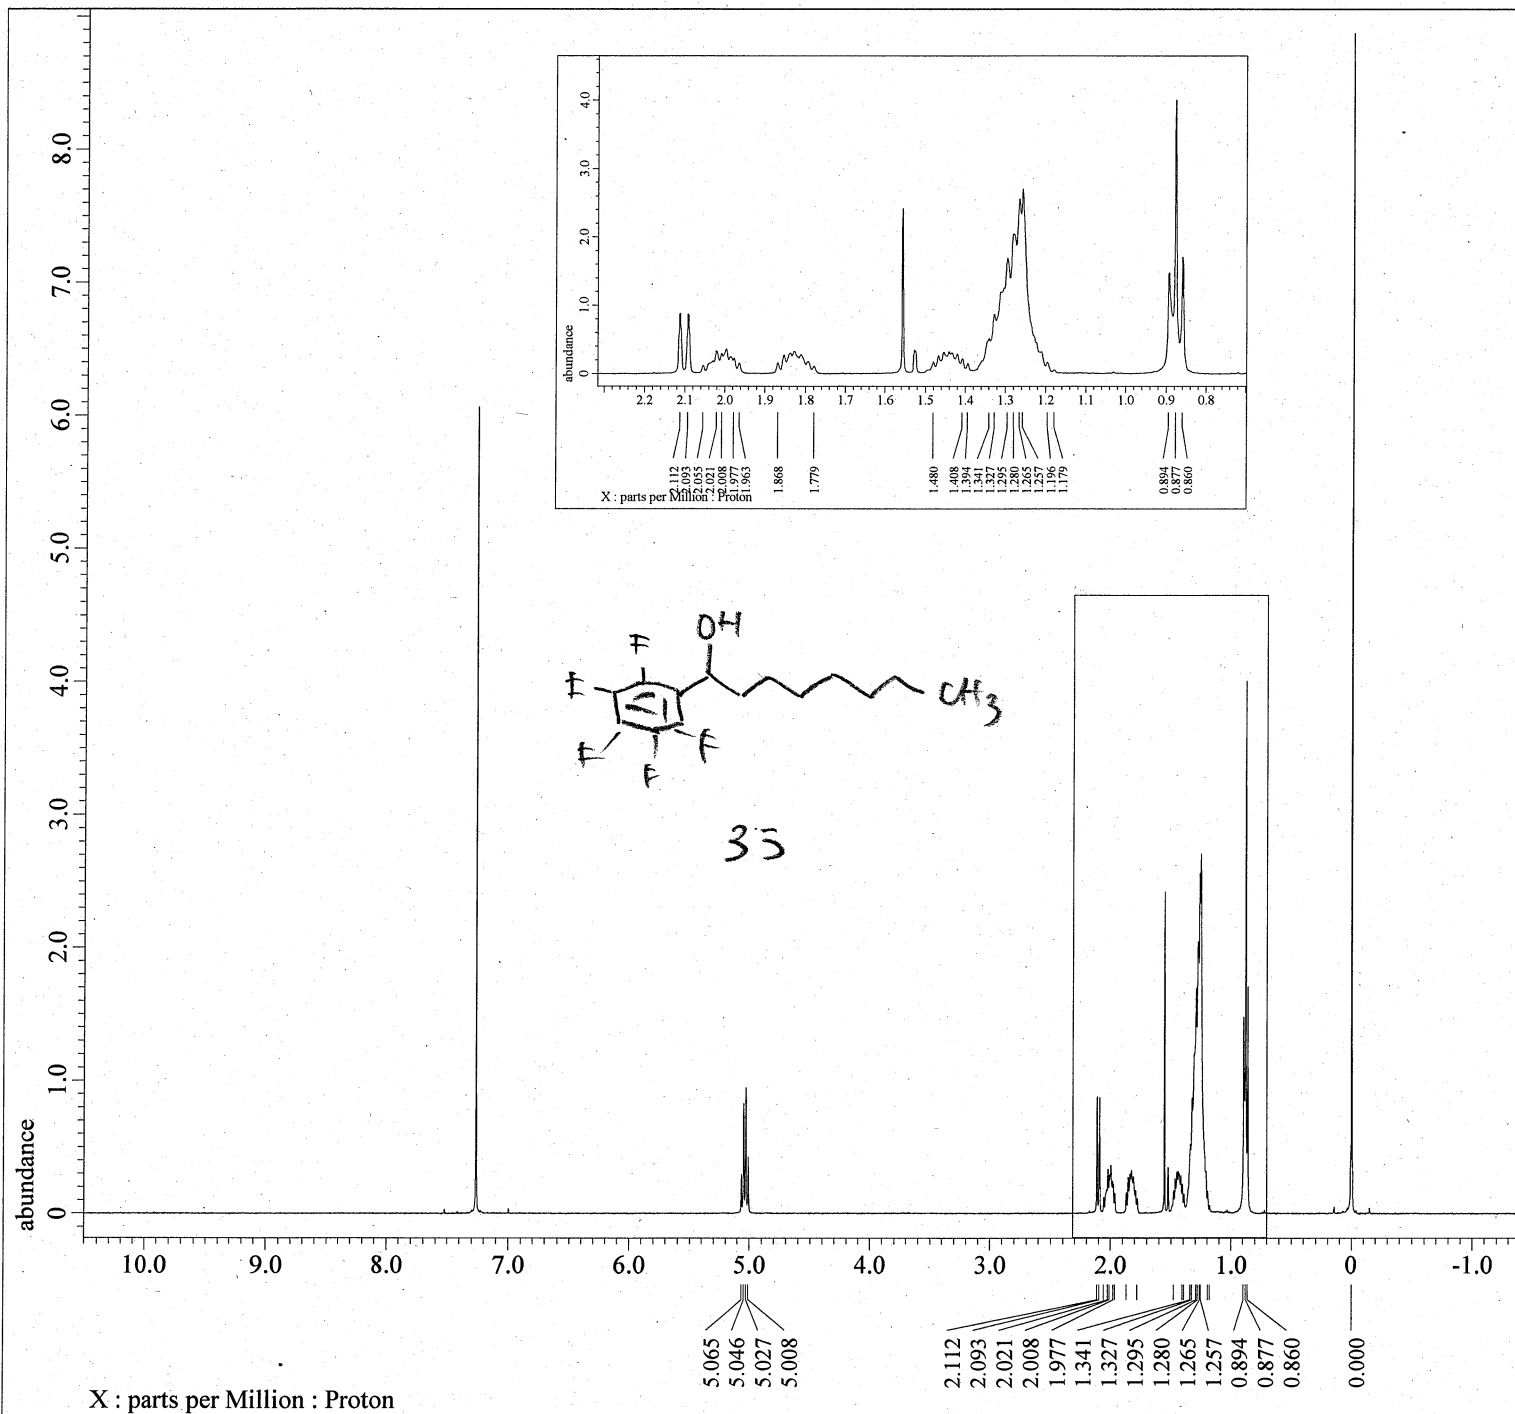

----- PROCESSING PARAMETERS -----

```

dc balance( 0, FALSE )
sexp( 0.2[Hz], 0.0[s] )
trapezoid( 0[%], 0[%], 80[%], 100[%] )
zerofill( 1 )
fft( 1, TRUE, TRUE )
machinephase
ppm

```

Derived from: TKH-1577GPC-2\_proton-1-1.jdf

Filename = TKH-1577GPC-2\_proton-1-2.  
 Author = element  
 Experiment = proton.jxp  
 Sample\_Id = TKH-1577GPC-2  
 Solvent = CHLOROFORM-D  
 Actual\_Start\_Time = 8-MAR-2022 20:02:12  
 Revision\_Time = 7-SEP-2022 13:11:29

Comment = single\_pulse  
 Data Format = 1D COMPLEX  
 Dim\_Size = 13107  
 X\_Domain = Proton  
 Dim\_Title = Proton  
 Dim\_Units = [ppm]  
 Dimensions = X  
 Site = JNM-ECS400  
 Spectrometer = DELTA2\_NMR

Field Strength = 9.37221[T] (400[MHz])  
 X\_Acq\_Duration = 2.1889024[s]  
 X\_Domain = 1H  
 X\_Freq = 399.03472754[MHz]  
 X\_Offset = 5.0[ppm]  
 X\_Points = 16384  
 X\_Prescans = 1  
 X\_Resolution = 0.45684997[Hz]  
 X\_Sweep = 7.48502994[kHz]  
 X\_Sweep\_Clippped = 5.98802395[kHz]  
 Irr\_Domain = Proton  
 Irr\_Freq = 399.03472754[MHz]  
 Irr\_Offset = 5.0[ppm]  
 Tri\_Domain = Proton  
 Tri\_Freq = 399.03472754[MHz]  
 Tri\_Offset = 5.0[ppm]  
 Clipped = FALSE  
 Scans = 8  
 Total\_Scans = 8

Relaxation\_Delay = 5[s]  
 Recvr\_Gain = 50  
 Temp\_Get = 18.4[dC]  
 X\_90\_Width = 6.6[us]  
 X\_Acq\_Time = 2.1889024[s]  
 X\_Angle = 45[deg]  
 X\_Atn = 1[dB]  
 X\_Pulse = 3.3[us]  
 Irr\_Mode = Off  
 Tri\_Mode = Off  
 Dante\_Presat = FALSE  
 Initial\_Wait = 1[s]  
 Repetition\_Time = 7.1889024[s]



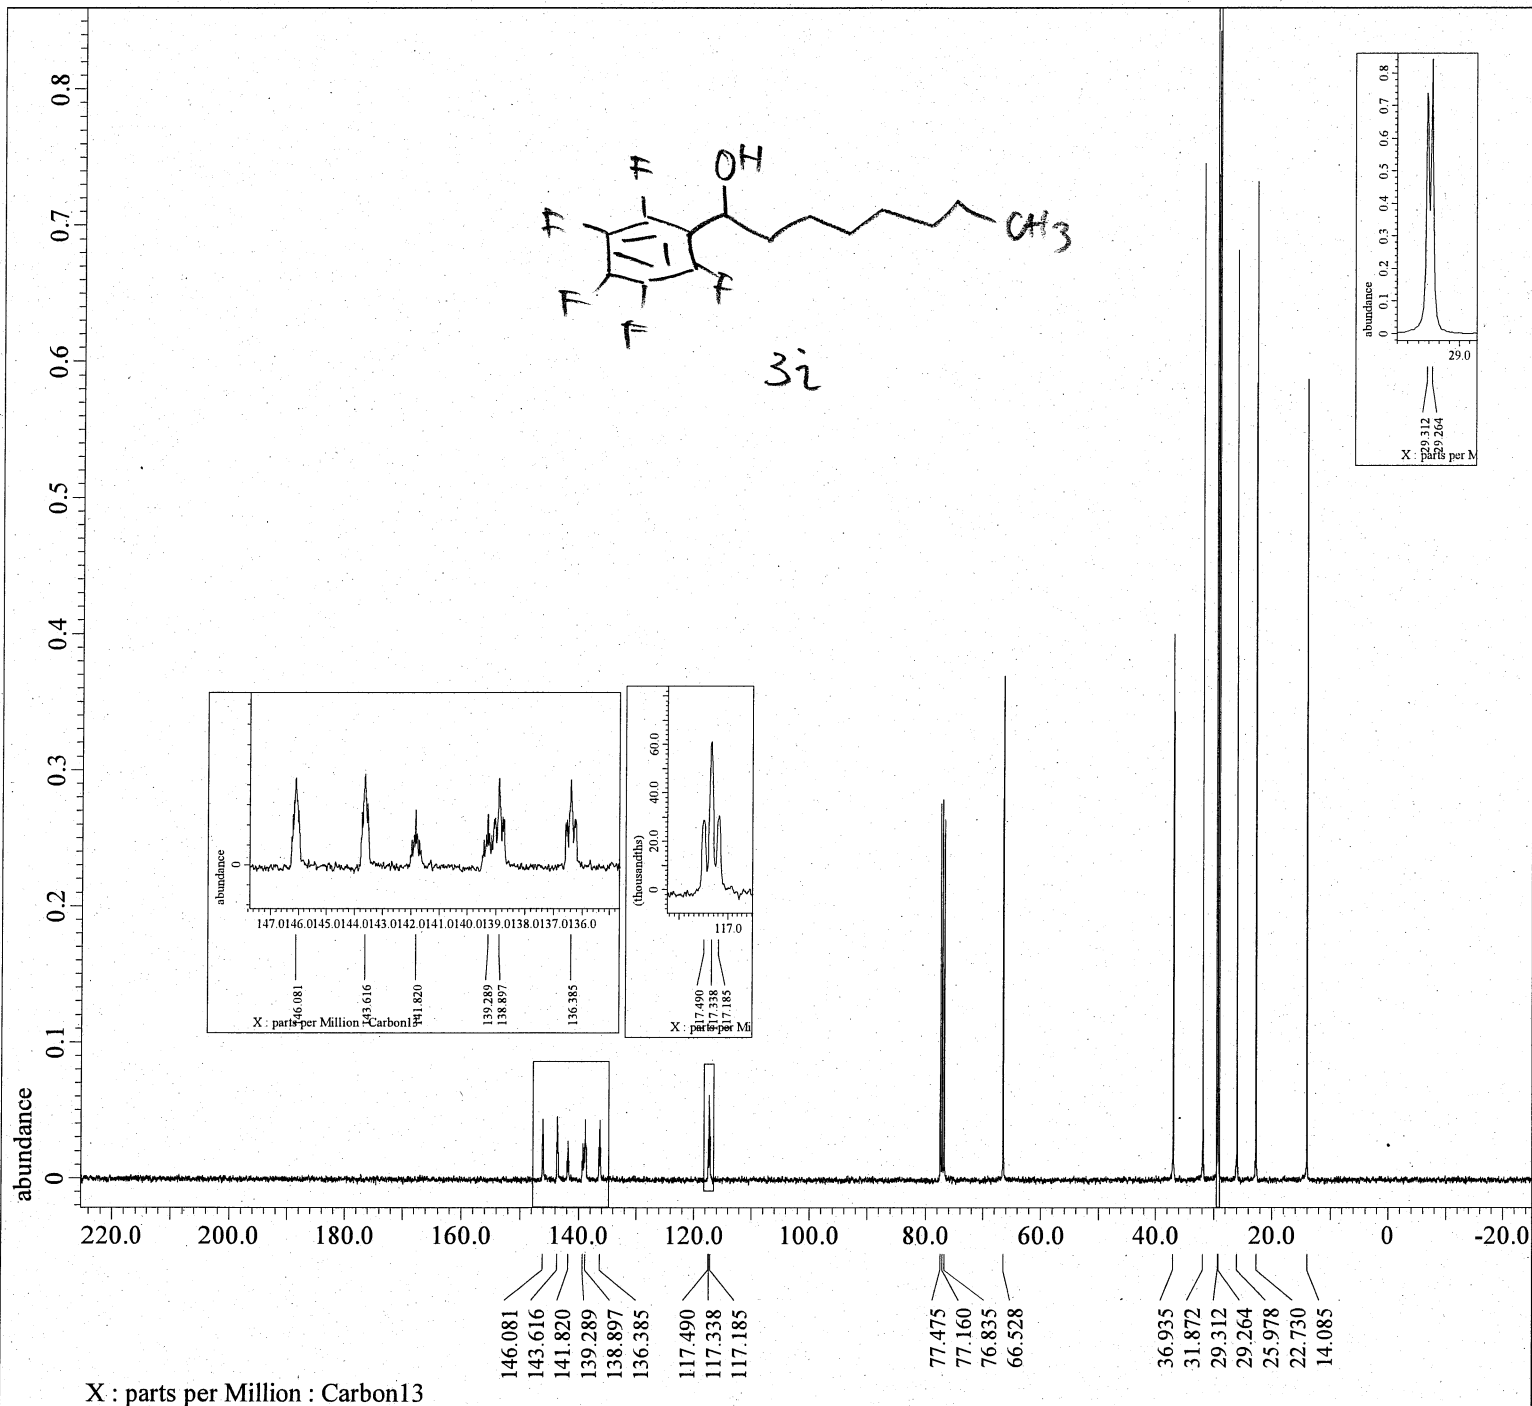

```

---- PROCESSING PARAMETERS ----
dc_balance( 0, FALSE )
sexp( 2.0[Hz], 0.0[s] )
trapezoid( 0[%], 0[%], 80[%], 100[%] )
zerofill( 1 )
fft( 1, TRUE, TRUE )
machinephase
ppm

```

以下に由来: TKH-1577\_carbon-1-1.jdf

```

Filename      = TKH-1577_carbon-1-2.jdf
Author        = element
Experiment    = carbon.jxp
Sample_Id     = TKH-1577
Solvent       = CHLOROFORM-D
Actual_Start_Time = 8-MAR-2022 20:56:59
Revision_Time = 11-MAR-2022 10:20:17

```

```

Comment      = single pulse decoupled ga
Data Format   = 1D COMPLEX
Dim Size     = 26214
X Domain     = Carbon
Dim Title    = Carbon13
Dim Units    = [ppm]
Dimensions   = X
Site         = JNM-ECS400
Spectrometer = DELTA2_NMR

```

```

Field_Strength = 9.37221[T] (400[MHz])
X Acq_Duration = 1.04333312[s]
X Domain      = 13C
X_Freq       = 100.33735165[MHz]
X_Offset     = 100.0[ppm]
X_Points     = 32768
X_Prescans   = 4
X_Resolution = 0.95846665[Hz]
X_Sweep      = 31.40703518[kHz]
X_Sweep_Clip = 25.12562814[kHz]
Irr_Domain   = Proton
Irr_Freq     = 399.03472754[MHz]
Irr_Offset   = 5.0[ppm]
Clipped      = FALSE
Scans        = 400
Total_Scans  = 400

```

```

Relaxation_Delay = 2[s]
Recvr_Gain       = 50
Temp_Get        = 18.2[dc]
X_90_Width      = 10.9[us]
X_Acq_Time      = 1.04333312[s]
X_Angle         = 30[deg]
X_Atn           = 5.4[dB]
X_Pulse         = 3.63333333[us]
Irr_Atn_Dec     = 25.823[dB]
Irr_Atn_No     = 25.823[dB]
Irr_Noise       = WALTZ
Irr_Pwidth      = 0.115[ms]
Decoupling      = TRUE
Initial_Wait    = 1[s]
Noe             = TRUE
Noe_Time        = 2[s]
Repetition_Time = 3.04333312[s]

```

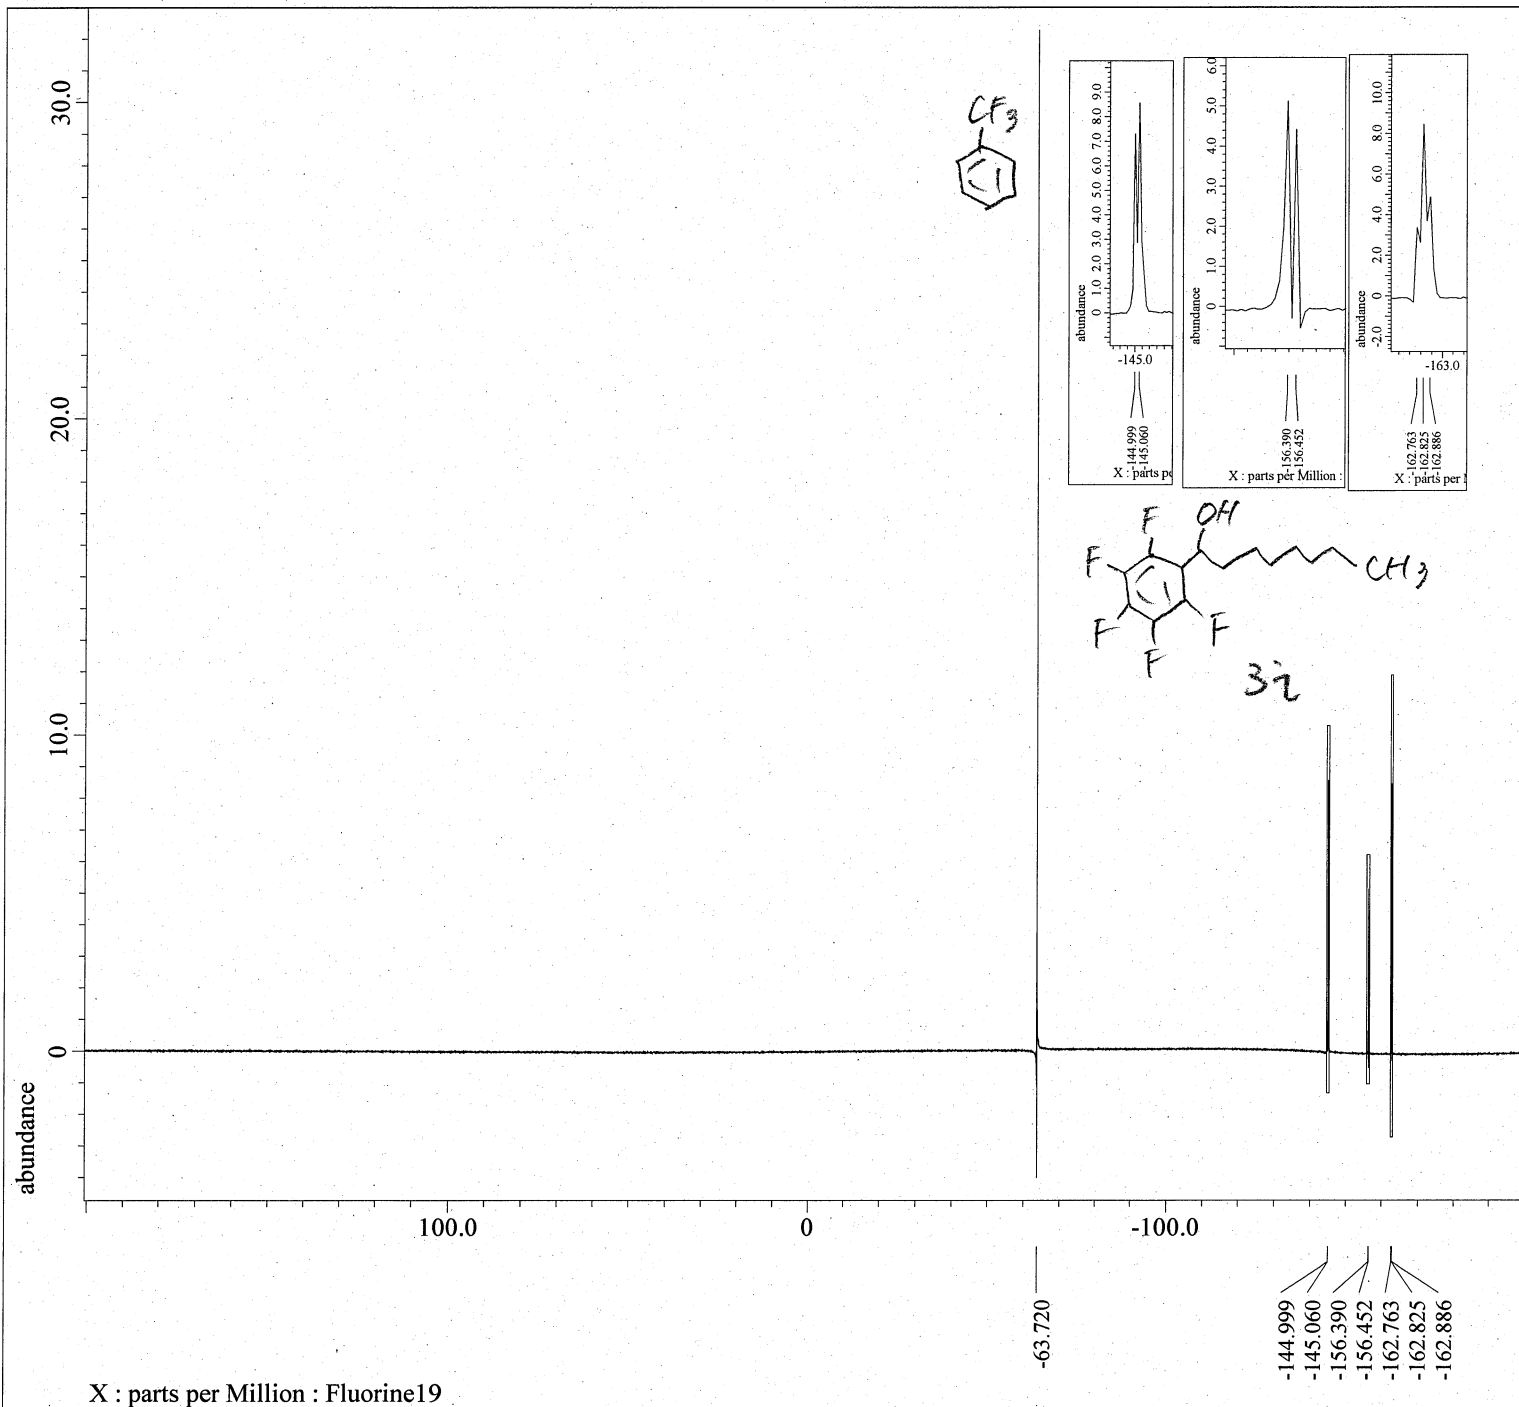

```

---- PROCESSING PARAMETERS ----
dc_balance( 0, FALSE )
sexp( 0.2[Hz], 0.0[s] )
trapezoid( 0[%], 0[%], 80[%], 100[%] )
zerofill( 1 )
fft( 1, TRUE, TRUE )
machinphase
ppm
phase( 68, 0, 50[%] )

以下に由来: TKH-1577_F_standard_proton-1-1.jdf

```

```

Filename      = TKH-1577_F_standard_proton-1-1.jdf
Author       = element
Experiment    = proton.jxp
Sample_Id     = TKH-1577_F_standard
Solvent       = CHLOROFORM-D
Actual_Start_Time = 8-MAR-2022 20:48:06
Revision_Time = 11-MAR-2022 13:57:21

Comment       = single pulse
Data Format    = 1D COMPLEX
Dim Size      = 13107
X Domain      = Fluorine19
Dim Title     = Fluorine19
Dim Units     = [ppm]
Dimensions    = X
Site          = JNM-ECS400
Spectrometer  = DELTA2_NMR

Field_Strength = 9.37221[T] (400[MHz])
X Acq_Duration = 86.50752[ms]
X Domain       = 19F
X Freq         = 375.46772873[MHz]
X Offset       = 0[ppm]
X Points       = 16384
X Prescans     = 1
X Resolution    = 11.55968868[Hz]
X Sweep        = 189.39393939[kHz]
X Sweep_Clippped = 151.51515152[kHz]
Irr_Domain     = Fluorine19
Irr_Freq       = 375.46772873[MHz]
Irr_Offset     = 5[ppm]
Tri_Domain     = Fluorine19
Tri_Freq       = 375.46772873[MHz]
Tri_Offset     = 5[ppm]
Clipped        = FALSE
Scans          = 8
Total_Scans    = 8

Relaxation_Delay = 5[s]
Recvr_Gain       = 50
Temp_Get         = 18.2[dc]
X 90_Width       = 7.6[us]
X Acq_Time       = 86.50752[ms]
X Angle          = 45[deg]
X Atn            = 2.5[dB]
X Pulse          = 3.8[us]
Irr_Mode         = Off
Tri_Mode         = Off
Dante_Presat     = FALSE
Initial_Wait     = 1[s]
Repetition_Time  = 5.08650752[s]

```

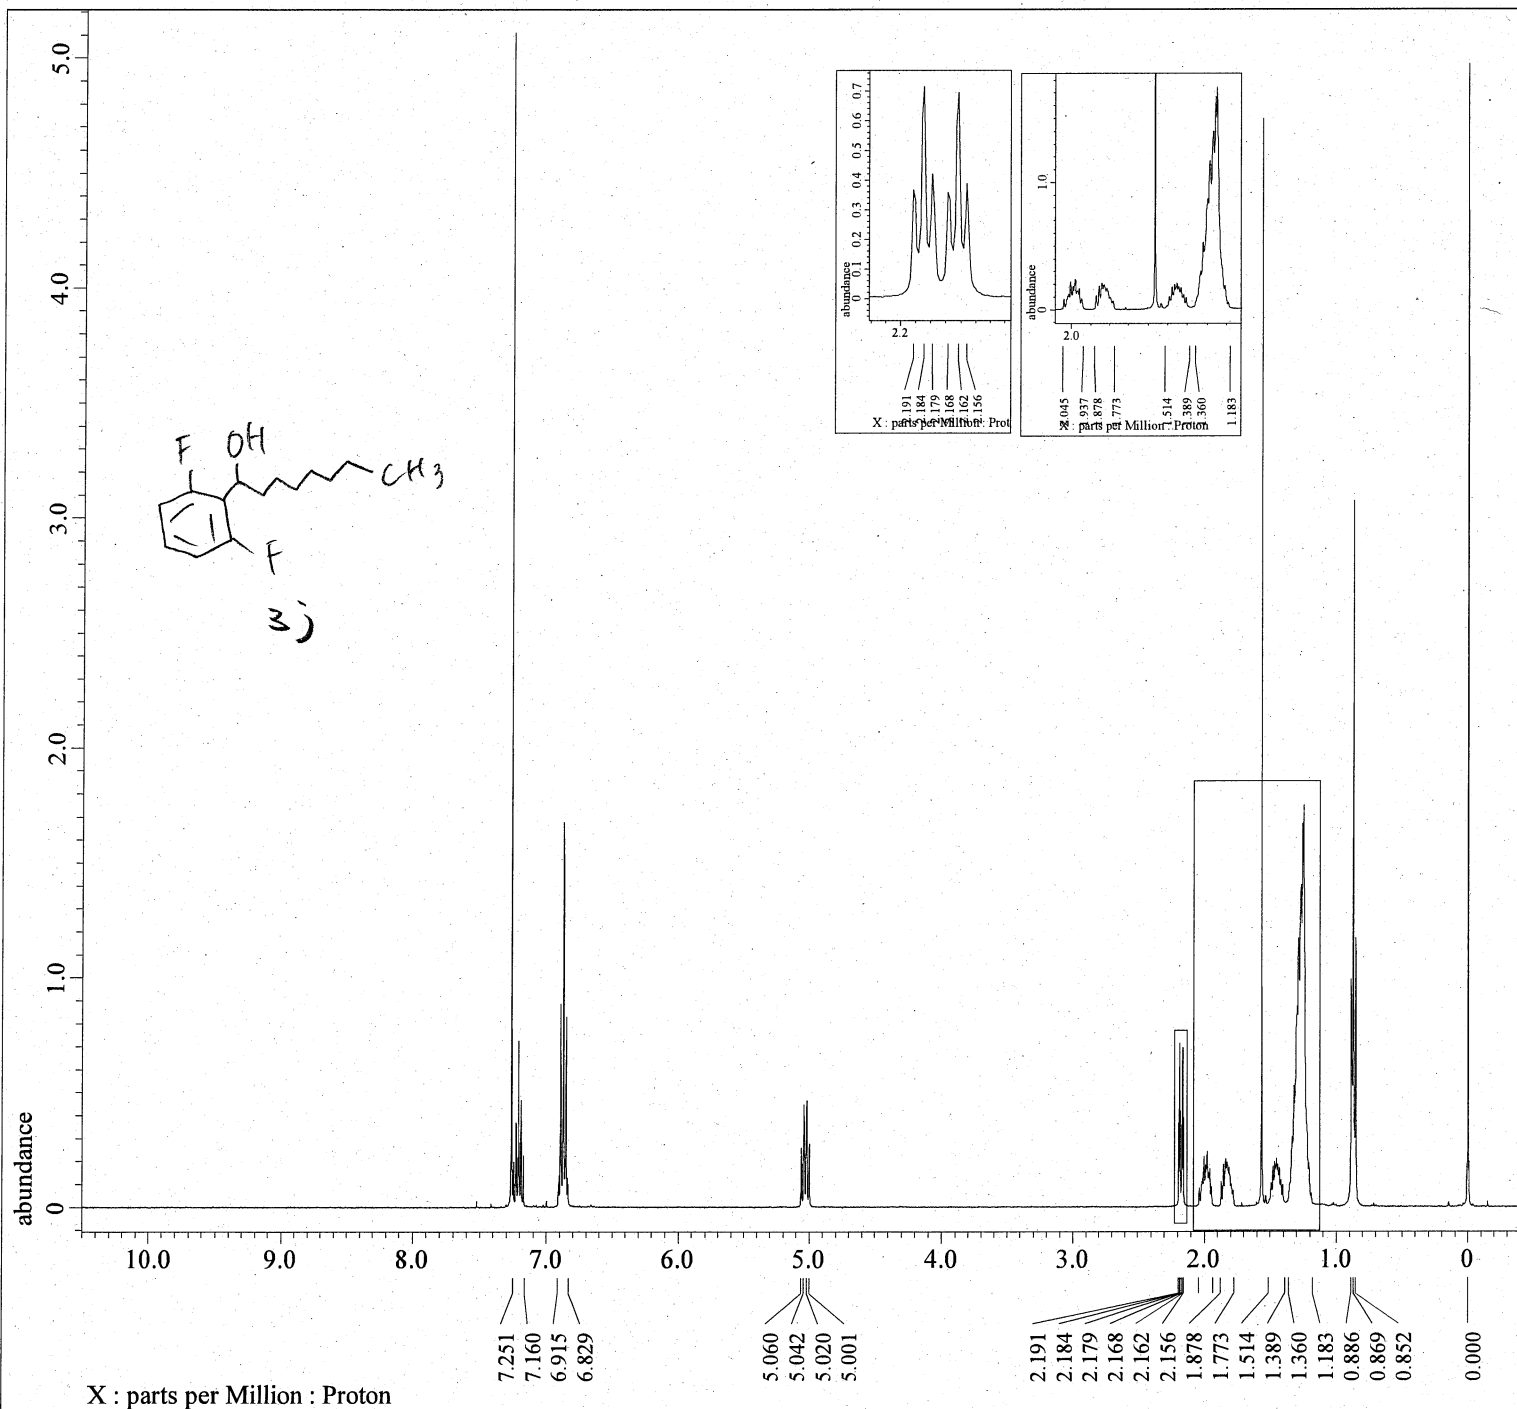

----- PROCESSING PARAMETERS -----

```

dc_balance( 0, FALSE )
sexp( 0.2[Hz], 0.0[s] )
trapezoid( 0[%], 0[%], 80[%], 100[%] )
zerofill( 1 )
fft( 1, TRUE, TRUE )
machinephase
ppm

```

以下に由来: TKH-1396\_H\_Proton-1-1.jdf

|                   |                             |
|-------------------|-----------------------------|
| Filename          | = TKH-1396_H_Proton-1-2.jdf |
| Author            | = element                   |
| Experiment        | = proton.jxp                |
| Sample_Id         | = TKH-1396_H                |
| Solvent           | = CHLOROFORM-D              |
| Actual_Start_Time | = 5-MAR-2022 20:36:17       |
| Revision_Time     | = 11-MAR-2022 10:27:59      |
| Comment           | = single pulse              |
| Data Format       | = 1D COMPLEX                |
| Dim_Size          | = 13107                     |
| X_Domain          | = Proton                    |
| Dim_Title         | = Proton                    |
| Dim_Units         | = [ppm]                     |
| Dimensions        | = X                         |
| Site              | = JNM-ECS400                |
| Spectrometer      | = DELTA2_NMR                |
| Field_Strength    | = 9.37221[T] (400[MHz])     |
| X_Acq_Duration    | = 2.1889024[s]              |
| X_Domain          | = 1H                        |
| X_Freq            | = 399.03472754[MHz]         |
| X_Offset          | = 5.0[ppm]                  |
| X_Points          | = 16384                     |
| X_Prescans        | = 1                         |
| X_Resolution      | = 0.45684997[Hz]            |
| X_Sweep           | = 7.48502994[kHz]           |
| X_Sweep_Clipped   | = 5.98802395[kHz]           |
| Irr_Domain        | = Proton                    |
| Irr_Freq          | = 399.03472754[MHz]         |
| Irr_Offset        | = 5.0[ppm]                  |
| Tri_Domain        | = Proton                    |
| Tri_Freq          | = 399.03472754[MHz]         |
| Tri_Offset        | = 5.0[ppm]                  |
| Clipped           | = FALSE                     |
| Scans             | = 8                         |
| Total_Scans       | = 8                         |
| Relaxation_Delay  | = 5[s]                      |
| Recvr_Gain        | = 46                        |
| Temp_Get          | = 17.7[deg]                 |
| X_90_Width        | = 6.6[us]                   |
| X_Acq_Time        | = 2.1889024[s]              |
| X_Angle           | = 45[deg]                   |
| X_Atn             | = 1[dB]                     |
| X_Pulse           | = 3.3[us]                   |
| Irr_Mode          | = Off                       |
| Tri_Mode          | = Off                       |
| Dante_Presat      | = FALSE                     |
| Initial_Wait      | = 1[s]                      |
| Repetition_Time   | = 7.1889024[s]              |

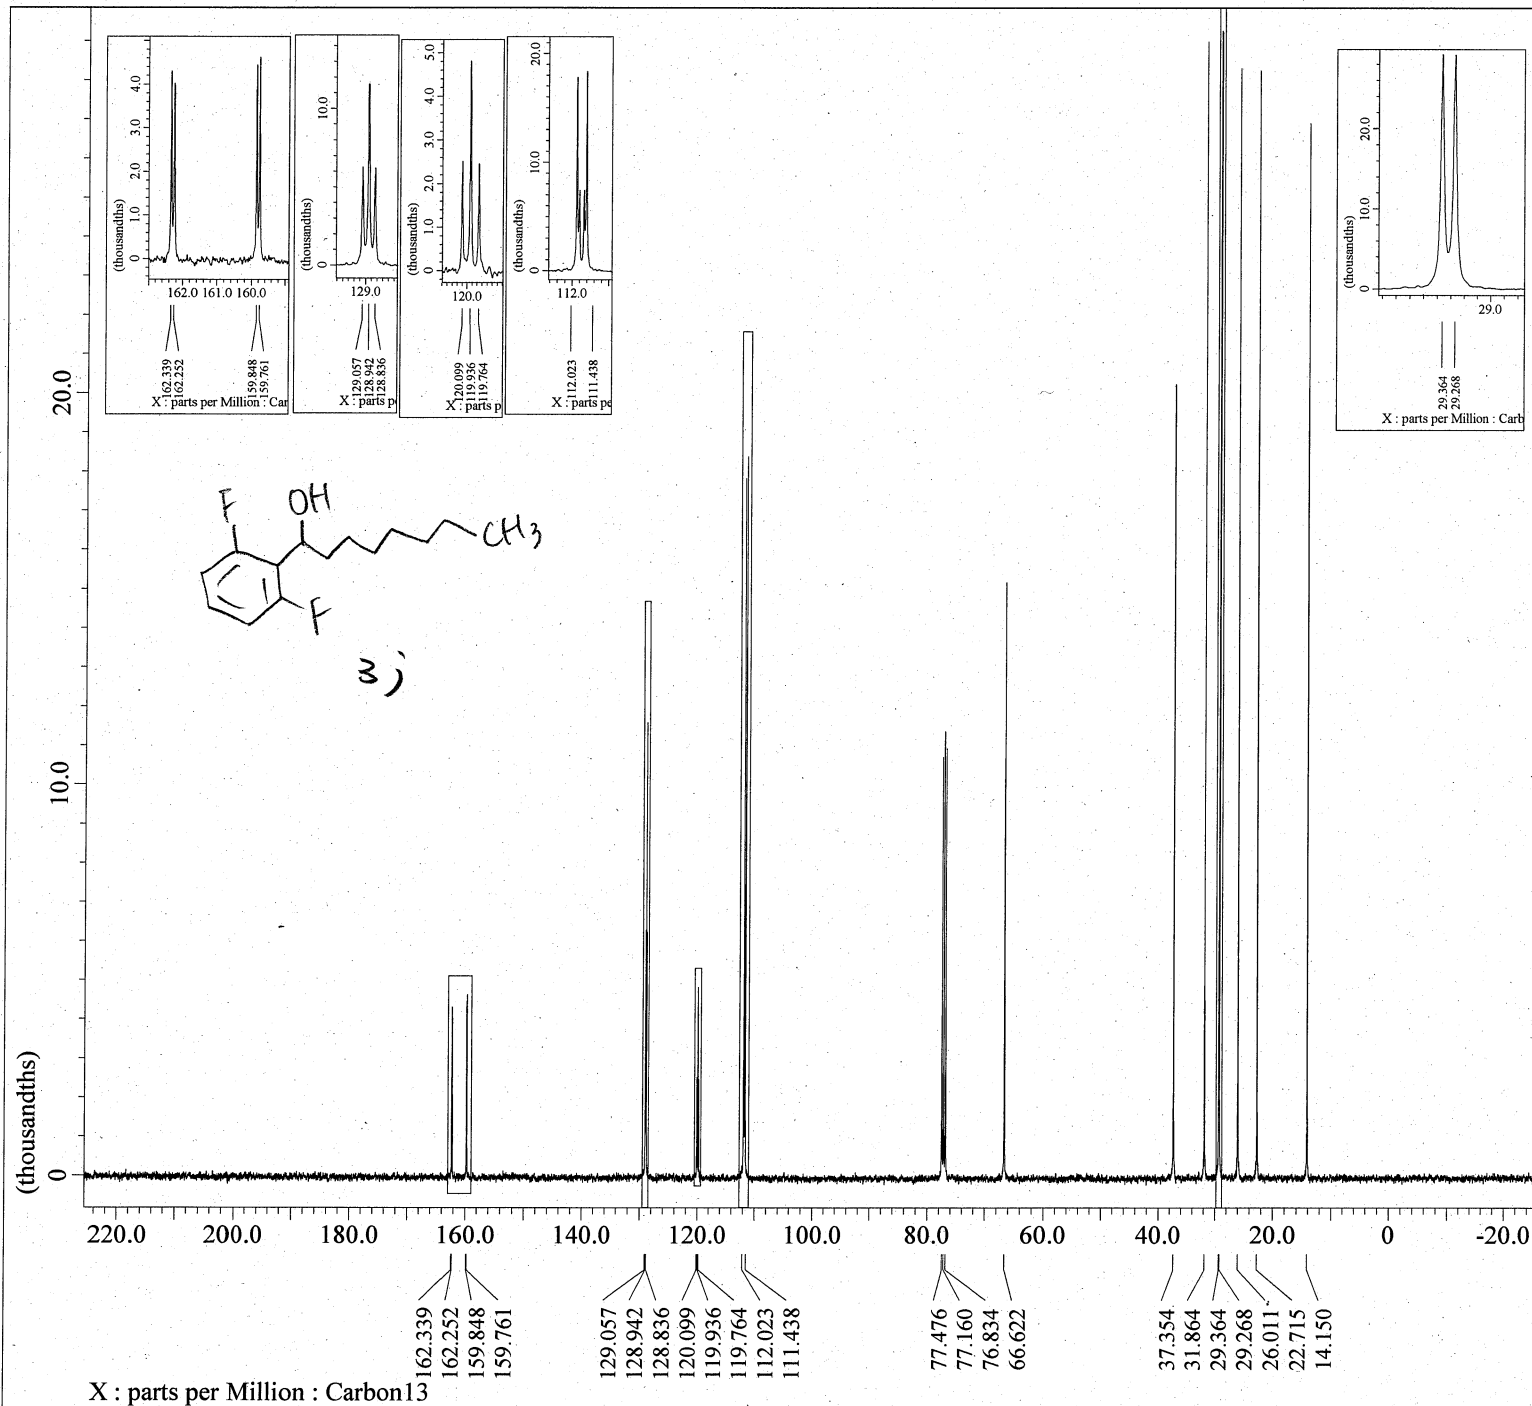

|                                        |                      |
|----------------------------------------|----------------------|
| ----- PROCESSING PARAMETERS -----      |                      |
| sexp( 2.0[Hz], 0.0[s] )                |                      |
| trapezoid( 0[%], 0[%], 80[%], 100[%] ) |                      |
| zerofill( 1 )                          |                      |
| fft( 1, TRUE, TRUE )                   |                      |
| machinephase                           |                      |
| ppm                                    |                      |
| 以下に由来: TKH-1396_carbon-1-1.jdf         |                      |
| Filename                               | = TKH-1396_carbon-1- |
| Author                                 | = element            |
| Experiment                             | = carbon.jxp         |
| Sample_Id                              | = TKH-1396           |
| Solvent                                | = CHLOROFORM-D       |
| Actual_Start_Time                      | = 8-MAR-2022 10:37:  |
| Revision_Time                          | = 11-MAR-2022 10:30: |
| Comment                                | = single pulse decou |
| Data Format                            | = 1D COMPLEX         |
| Dim_Size                               | = 26214              |
| X_Domain                               | = Carbon13           |
| Dim_Title                              | = Carbon13           |
| Dim_Units                              | = [ppm]              |
| Dimensions                             | = X                  |
| Spectrometer                           | = DELTA2_NMR         |
| Field_Strength                         | = 9.2982153[T] (400[ |
| X_Acq_Duration                         | = 1.048576[s]        |
| X_Domain                               | = Carbon13           |
| X_Freq                                 | = 99.54517646[MHz]   |
| X_Offset                               | = 100[ppm]           |
| X_Points                               | = 32768              |
| X_Prescans                             | = 4                  |
| X_Resolution                           | = 0.95367432[Hz]     |
| X_Sweep                                | = 31.25[kHz]         |
| X_Sweep_Clippped                       | = 25[kHz]            |
| Irr_Domain                             | = Proton             |
| Irr_Freq                               | = 395.88430144[MHz]  |
| Irr_Offset                             | = 5[ppm]             |
| Blanking                               | = 5[us]              |
| Clipped                                | = TRUE               |
| Scans                                  | = 400                |
| Total_Scans                            | = 400                |
| Relaxation_Delay                       | = 2[s]               |
| Recvr_Gain                             | = 50                 |
| Temp_Get                               | = 17.6[dC]           |
| X_90_Width                             | = 9.65[us]           |
| X_Acq_Time                             | = 1.048576[s]        |
| X_Angle                                | = 30[deg]            |
| X_Atn                                  | = 8[dB]              |
| X_Pulse                                | = 3.21666667[us]     |
| Irr_Atn_Dec                            | = 25.059[dB]         |
| Irr_Atn_Dec_Calc                       | = 25.059[dB]         |
| Irr_Atn_Dec_Default_Calc               | = 25.059[dB]         |
| Irr_Atn_No                             | = 25.059[dB]         |
| Irr_Dec_Bandwidth_Hz                   | = 4.7826087[kHz]     |
| Irr_Dec_Bandwidth_Ppm                  | = 12.08082432[ppm]   |
| Irr_Dec_Freq                           | = 395.88430144[MHz]  |
| Irr_Dec_Merit_Factor                   | = 2.2                |
| Irr_Decoupling                         | = TRUE               |
| Irr_No                                 | = TRUE               |
| Irr_Noise                              | = WALTZ              |
| Irr_Offset_Default                     | = 5[ppm]             |

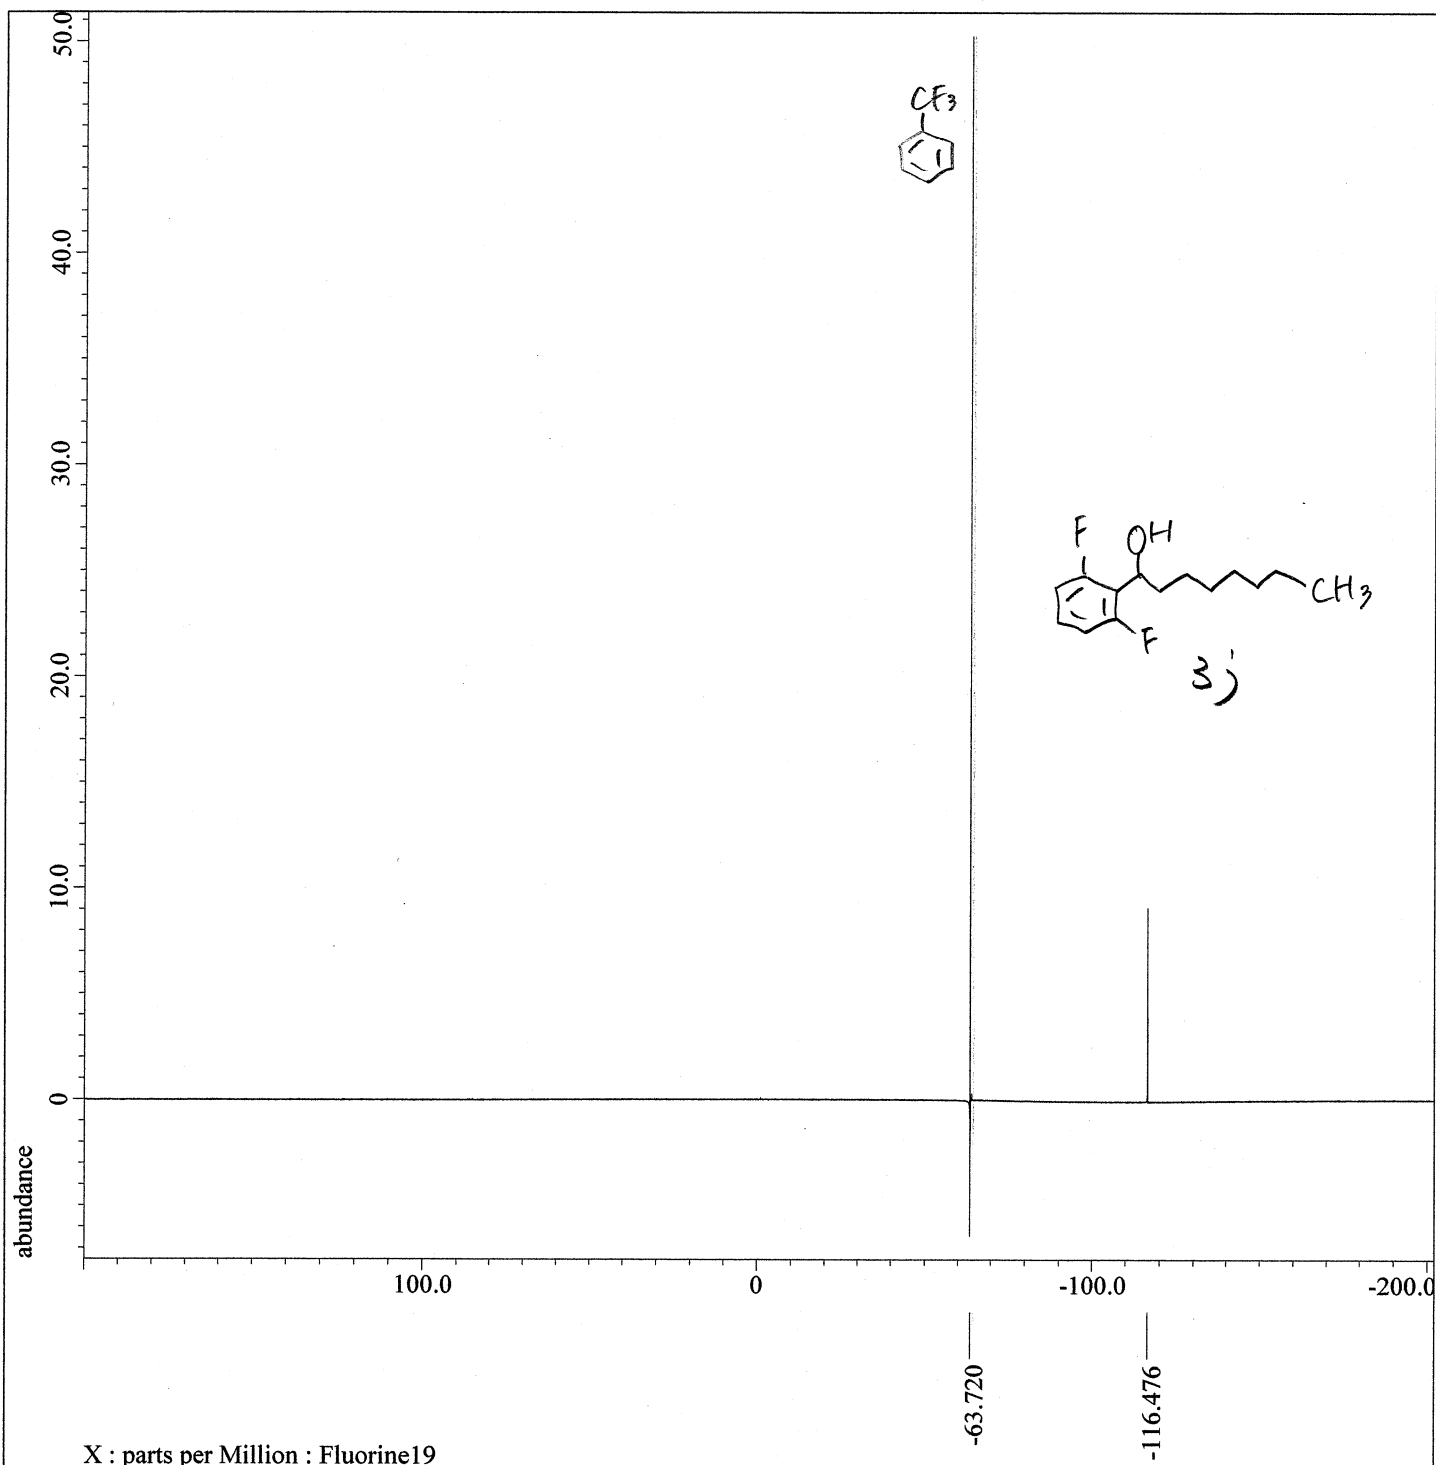

----- PROCESSING PARAMETERS -----  
 dc\_balance( 0, FALSE )  
 sexp( 0.2[Hz], 0.0[s] )  
 trapezoid( 0[%], 0[%], 80[%], 100[%] )  
 zerofill( 1 )  
 fft( 1, TRUE, TRUE )  
 machinephase  
 ppm  
 phase( 65, 0, 50[%] )

以下に由来: TKH-1396\_F\_standard\_single\_pulse

Filename = TKH-1396\_F\_standard\_sing  
 Author = element  
 Experiment = single\_pulse.jsp  
 Sample\_Id = TKH-1396\_F\_standard  
 Solvent = CHLOROFORM-D  
 Creation\_Time = 5-MAR-2022 21:04:09  
 Revision\_Time = 5-MAR-2022 20:47:51  
 Current\_Time = 5-MAR-2022 20:47:56

Comment = single\_pulse  
 Data\_Format = 1D COMPLEX  
 Dim\_Size = 13107  
 Dim\_Title = Fluorine19  
 Dim\_Units = [ppm]  
 Dimensions = X  
 Spectrometer = DELTA2\_NMR

Field\_Strength = 9.4073814[T] (400[MHz])  
 X\_Acq\_Duration = 86.50752[ms]  
 X\_Domain = 19F  
 X\_Freq = 376.87675879[MHz]  
 X\_Offset = 0[ppm]  
 X\_Points = 16384  
 X\_Prescans = 1  
 X\_Resolution = 11.55968868[Hz]  
 X\_Sweep = 189.39393939[kHz]  
 X\_Sweep\_Clipped = 151.51515152[kHz]  
 Irr\_Domain = Fluorine19  
 Irr\_Freq = 376.87675879[MHz]  
 Irr\_Offset = 5[ppm]  
 Tri\_Domain = Fluorine19  
 Tri\_Freq = 376.87675879[MHz]  
 Tri\_Offset = 5[ppm]  
 Clipped = FALSE  
 Scans = 8  
 Total\_Scans = 8

Relaxation\_Delay = 5[s]  
 Recvr\_Gain = 44  
 Temp\_Get = 18.7[dC]  
 X\_90\_Width = 6.8[us]  
 X\_Acq\_Time = 86.50752[ms]  
 X\_Angle = 45[deg]  
 X\_Atn = 3[dB]  
 X\_Pulse = 3.4[us]  
 Irr\_Mode = Off  
 Tri\_Mode = Off  
 Dante\_Presat = FALSE  
 Initial\_Wait = 1[s]  
 Repetition\_Time = 5.08650752[s]

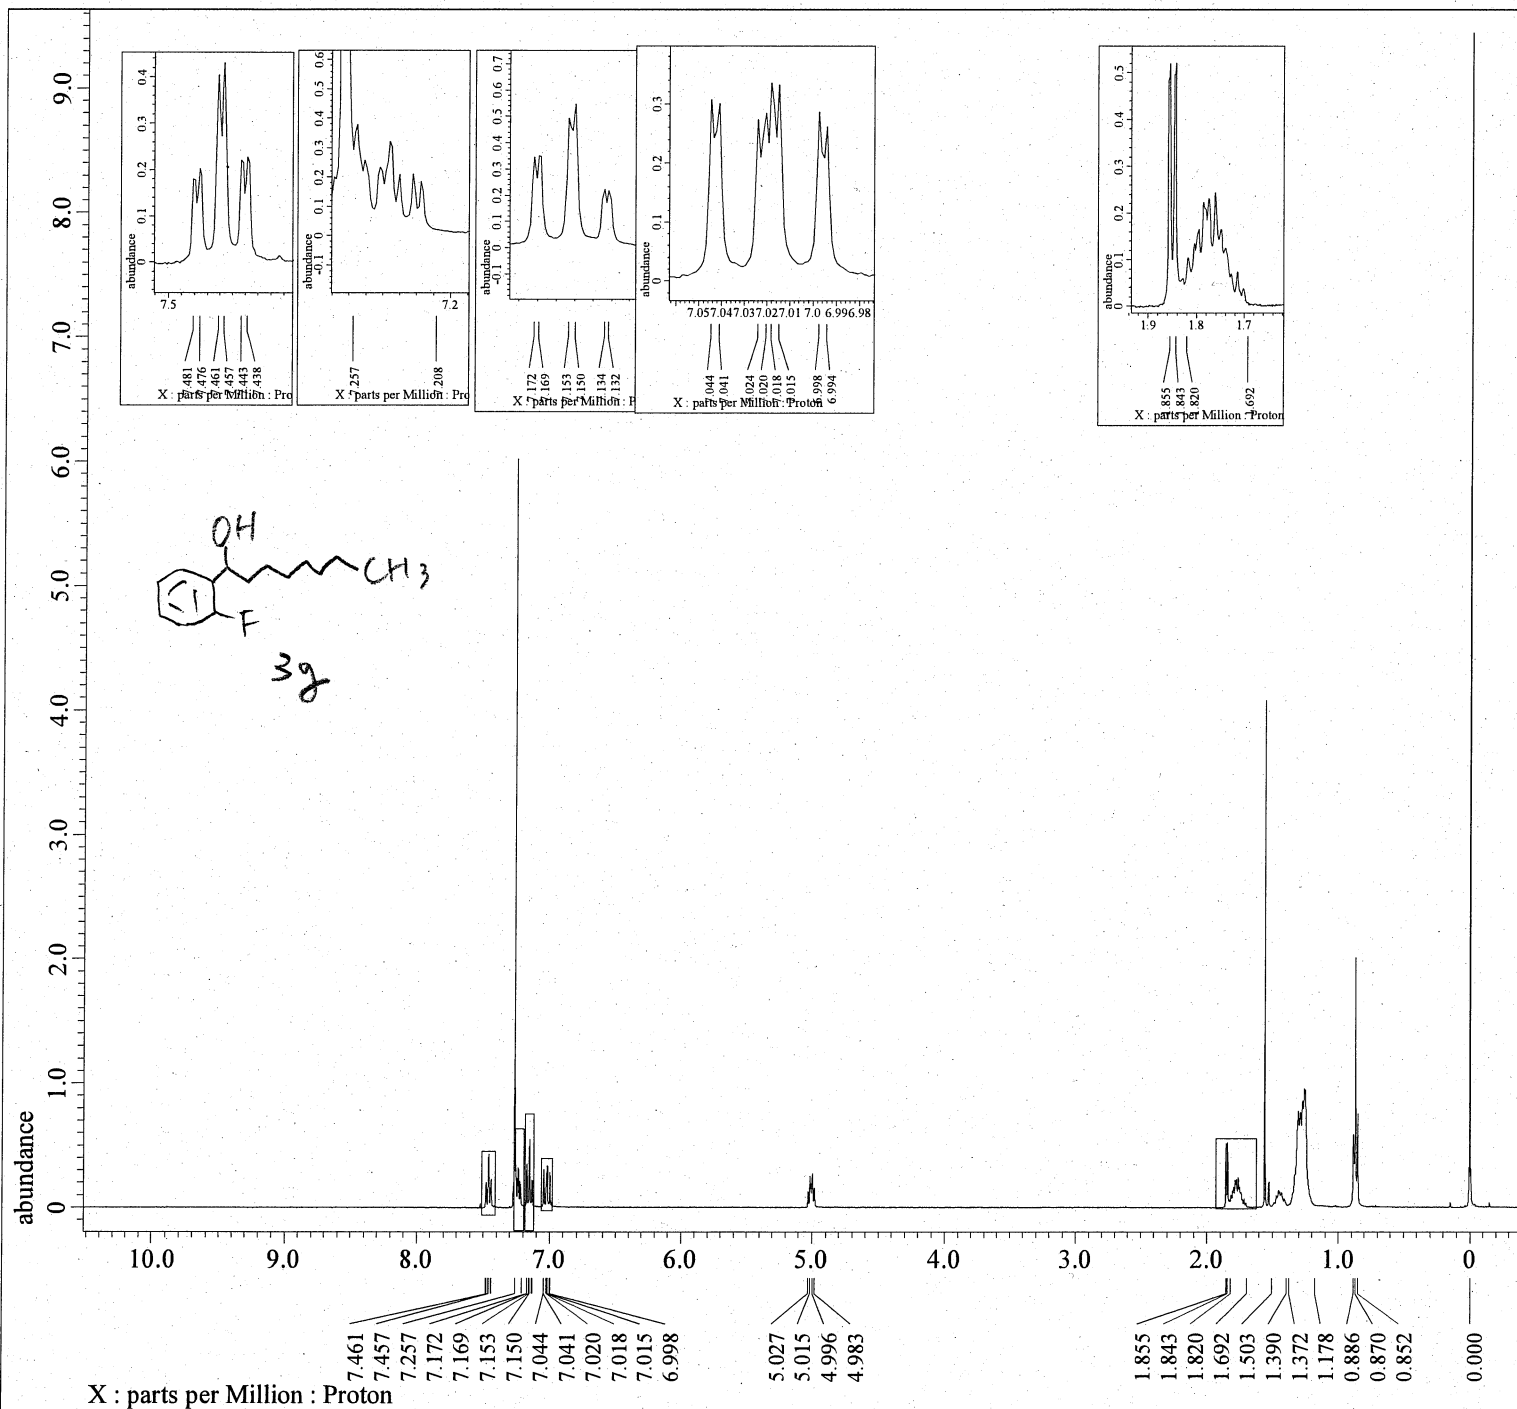

----- PROCESSING PARAMETERS -----

```

dc_balance( 0, FALSE )
sexp( 0.2[Hz], 0.0[s] )
trapezoid( 0[%], 0[%], 80[%], 100[%] )
zerofill( 1 )
fft( 1, TRUE, TRUE )
machinephase
ppm
phase( 2, 0, 50[%] )

```

以下に由来: TKH-1575GPC\_Proton-1-1.jdf

Filename = TKH-1575GPC\_Proton-1-2.jd  
 Author = element  
 Experiment = proton.jxp  
 Sample\_Id = TKH-1575GPC  
 Solvent = CHLOROFORM-D  
 Actual\_Start\_Time = 4-MAR-2022 22:00:25  
 Revision\_Time = 11-MAR-2022 10:42:16

Comment = single pulse  
 Data\_Format = 1D COMPLEX  
 Dim\_Size = 13107  
 X\_Domain = Proton  
 Dim\_Title = Proton  
 Dim\_Units = [ppm]  
 Dimensions = X  
 Site = JNM-ECS400  
 Spectrometer = DELTA2\_NMR

Field\_Strength = 9.37221[T] (400[MHz])  
 X\_Acq\_Duration = 2.1889024[s]  
 X\_Domain = 1H  
 X\_Freq = 399.03472754[MHz]  
 X\_Offset = 5.0[ppm]  
 X\_Points = 16384  
 X\_Prescans = 1  
 X\_Resolution = 0.45684997[Hz]  
 X\_Sweep = 7.48502994[kHz]  
 X\_Sweep\_Clippped = 5.98802395[kHz]  
 Irr\_Domain = Proton  
 Irr\_Freq = 399.03472754[MHz]  
 Irr\_Offset = 5.0[ppm]  
 Tri\_Domain = Proton  
 Tri\_Freq = 399.03472754[MHz]  
 Tri\_Offset = 5.0[ppm]  
 Clipped = FALSE  
 Scans = 8  
 Total\_Scans = 8

Relaxation\_Delay = 5[s]  
 Recvr\_Gain = 46  
 Temp\_Get = 17.6[dc]  
 X\_90\_Width = 6.6[us]  
 X\_Acq\_Time = 2.1889024[s]  
 X\_Angle = 45[deg]  
 X\_Atn = 1[dB]  
 X\_Pulse = 3.3[us]  
 Irr\_Mode = Off  
 Tri\_Mode = Off  
 Dante\_Presat = FALSE  
 Initial\_Wait = 1[s]  
 Repetition\_Time = 7.1889024[s]

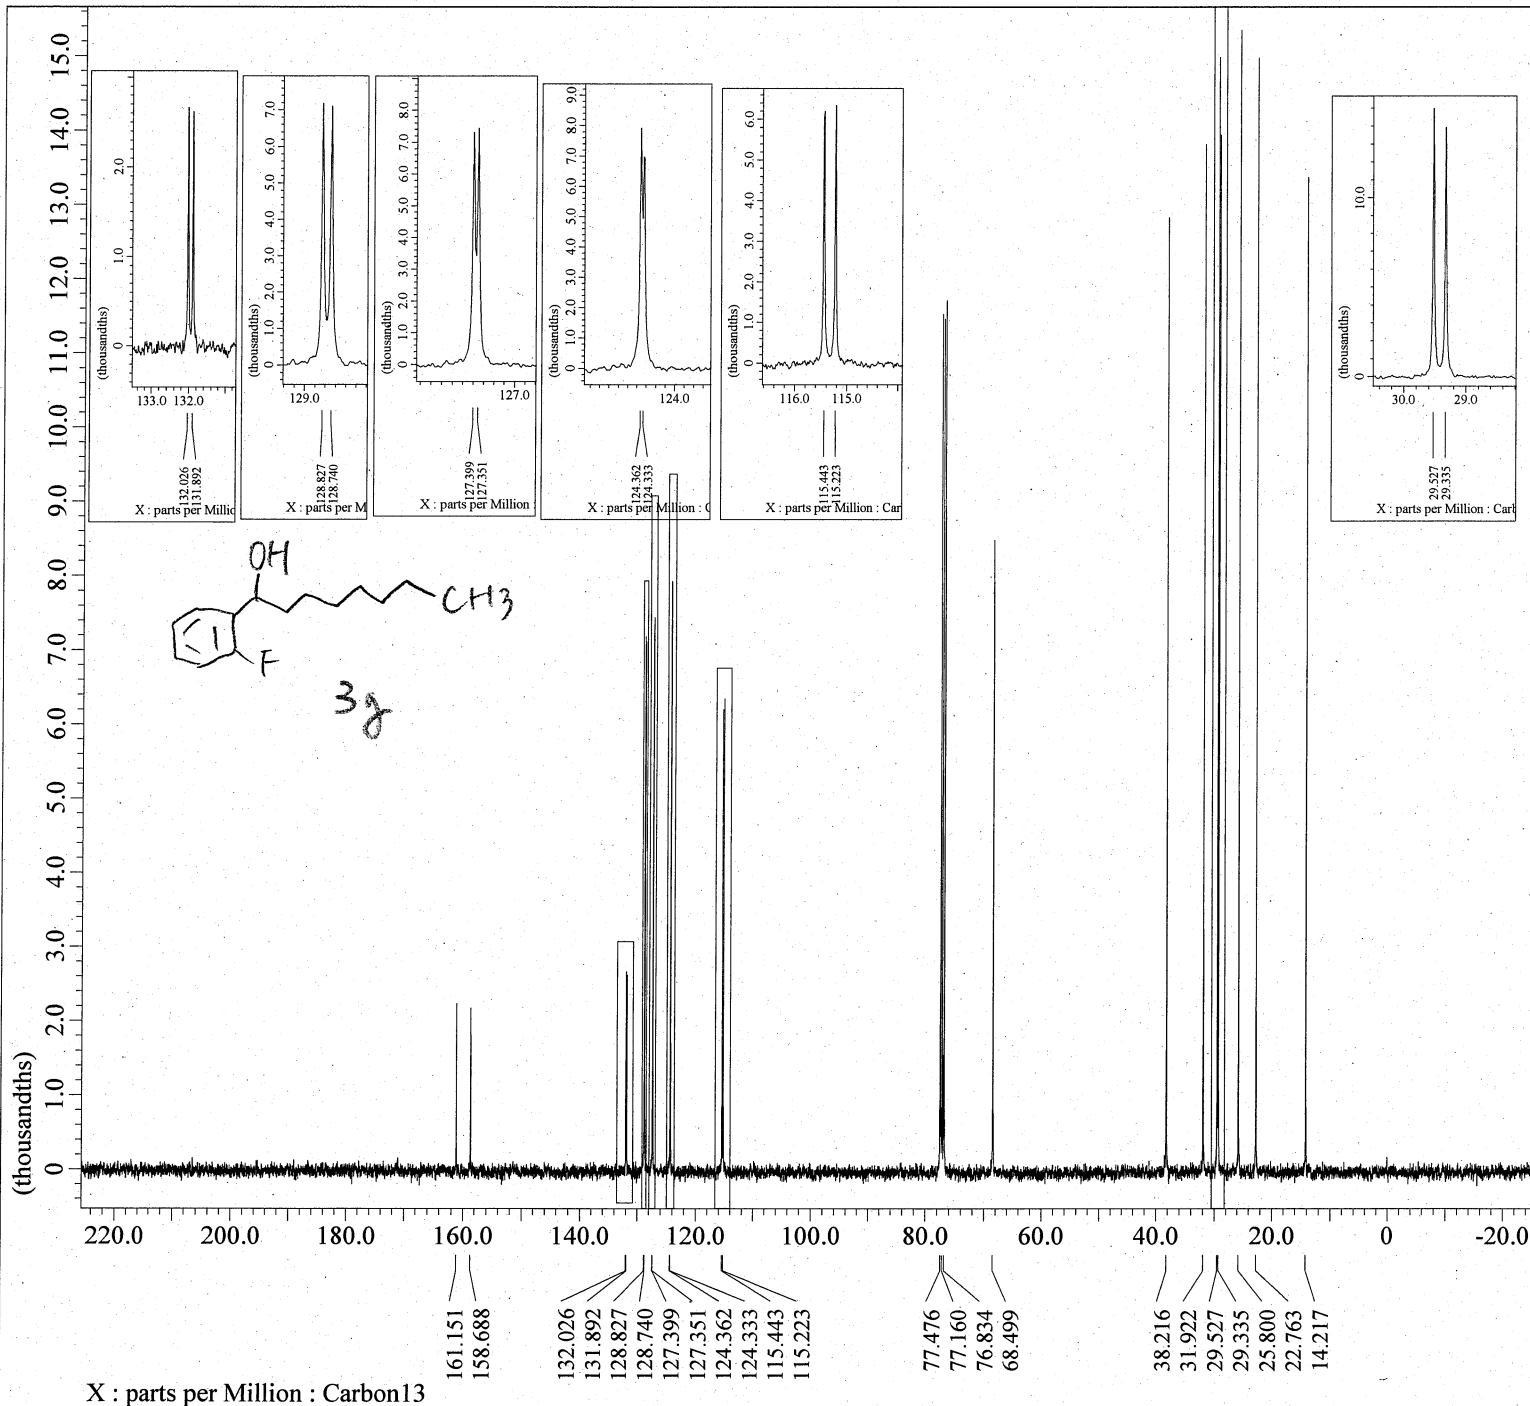

----- PROCESSING PARAMETERS -----

```

sexp( 2.0[Hz], 0.0[s] )
trapezoid( 0[%], 0[%], 80[%], 100[%] )
zerofill( 1 )
fft( 1, TRUE, TRUE )
machinephase
ppm

```

以下に由来: TKH-1575\_carbon-1-1.jdf

|                          |                      |
|--------------------------|----------------------|
| Filename                 | = TKH-1575_carbon-1- |
| Author                   | = element            |
| Experiment               | = carbon.jxp         |
| Sample_Id                | = TKH-1575           |
| Solvent                  | = CHLOROFORM-D       |
| Actual_Start_Time        | = 8-MAR-2022 12:55:  |
| Revision_Time            | = 10-MAR-2022 19:03: |
| Comment                  | = single pulse decou |
| Data Format              | = 1D COMPLEX         |
| Dim_Size                 | = 26214              |
| X_Domain                 | = Carbon13           |
| Dim_Title                | = Carbon13           |
| Dim_Units                | = [ppm]              |
| Dimensions               | = X                  |
| Spectrometer             | = DELTA2_NMR         |
| Field_Strength           | = 9.2982153[T] (400[ |
| X_Acq_Duration           | = 1.048576[s]        |
| X_Domain                 | = Carbon13           |
| X_Freq                   | = 99.54517646[MHz]   |
| X_Offset                 | = 100[ppm]           |
| X_Points                 | = 32768              |
| X_Prescans               | = 4                  |
| X_Resolution             | = 0.95367432[Hz]     |
| X_Sweep                  | = 31.25[kHz]         |
| X_Sweep_Clippped         | = 25[kHz]            |
| Irr_Domain               | = Proton             |
| Irr_Freq                 | = 395.88430144[MHz]  |
| Irr_Offset               | = 5[ppm]             |
| Blanking                 | = 5[us]              |
| Clipped                  | = TRUE               |
| Scans                    | = 400                |
| Total_Scans              | = 400                |
| Relaxation_Delay         | = 2[s]               |
| Recvr_Gain               | = 50                 |
| Temp_Get                 | = 17.9[dC]           |
| X_90_Width               | = 9.65[us]           |
| X_Acq_Time               | = 1.048576[s]        |
| X_Angle                  | = 30[deg]            |
| X_Atn                    | = 8[dB]              |
| X_Pulse                  | = 3.21666667[us]     |
| Irr_Atn_Dec              | = 25.059[dB]         |
| Irr_Atn_Dec_Calc         | = 25.059[dB]         |
| Irr_Atn_Dec_Default_Calc | = 25.059[dB]         |
| Irr_Atn_No               | = 25.059[dB]         |
| Irr_Dec_Bandwidth_Hz     | = 4.7826087[kHz]     |
| Irr_Dec_Bandwidth_Ppm    | = 12.08082432[ppm]   |
| Irr_Dec_Freq             | = 395.88430144[MHz]  |
| Irr_Dec_Merit_Factor     | = 2.2                |
| Irr_Decoupling           | = TRUE               |
| Irr_No                   | = TRUE               |
| Irr_Noise                | = WALTZ              |
| Irr_Offset_Default       | = 5[ppm]             |

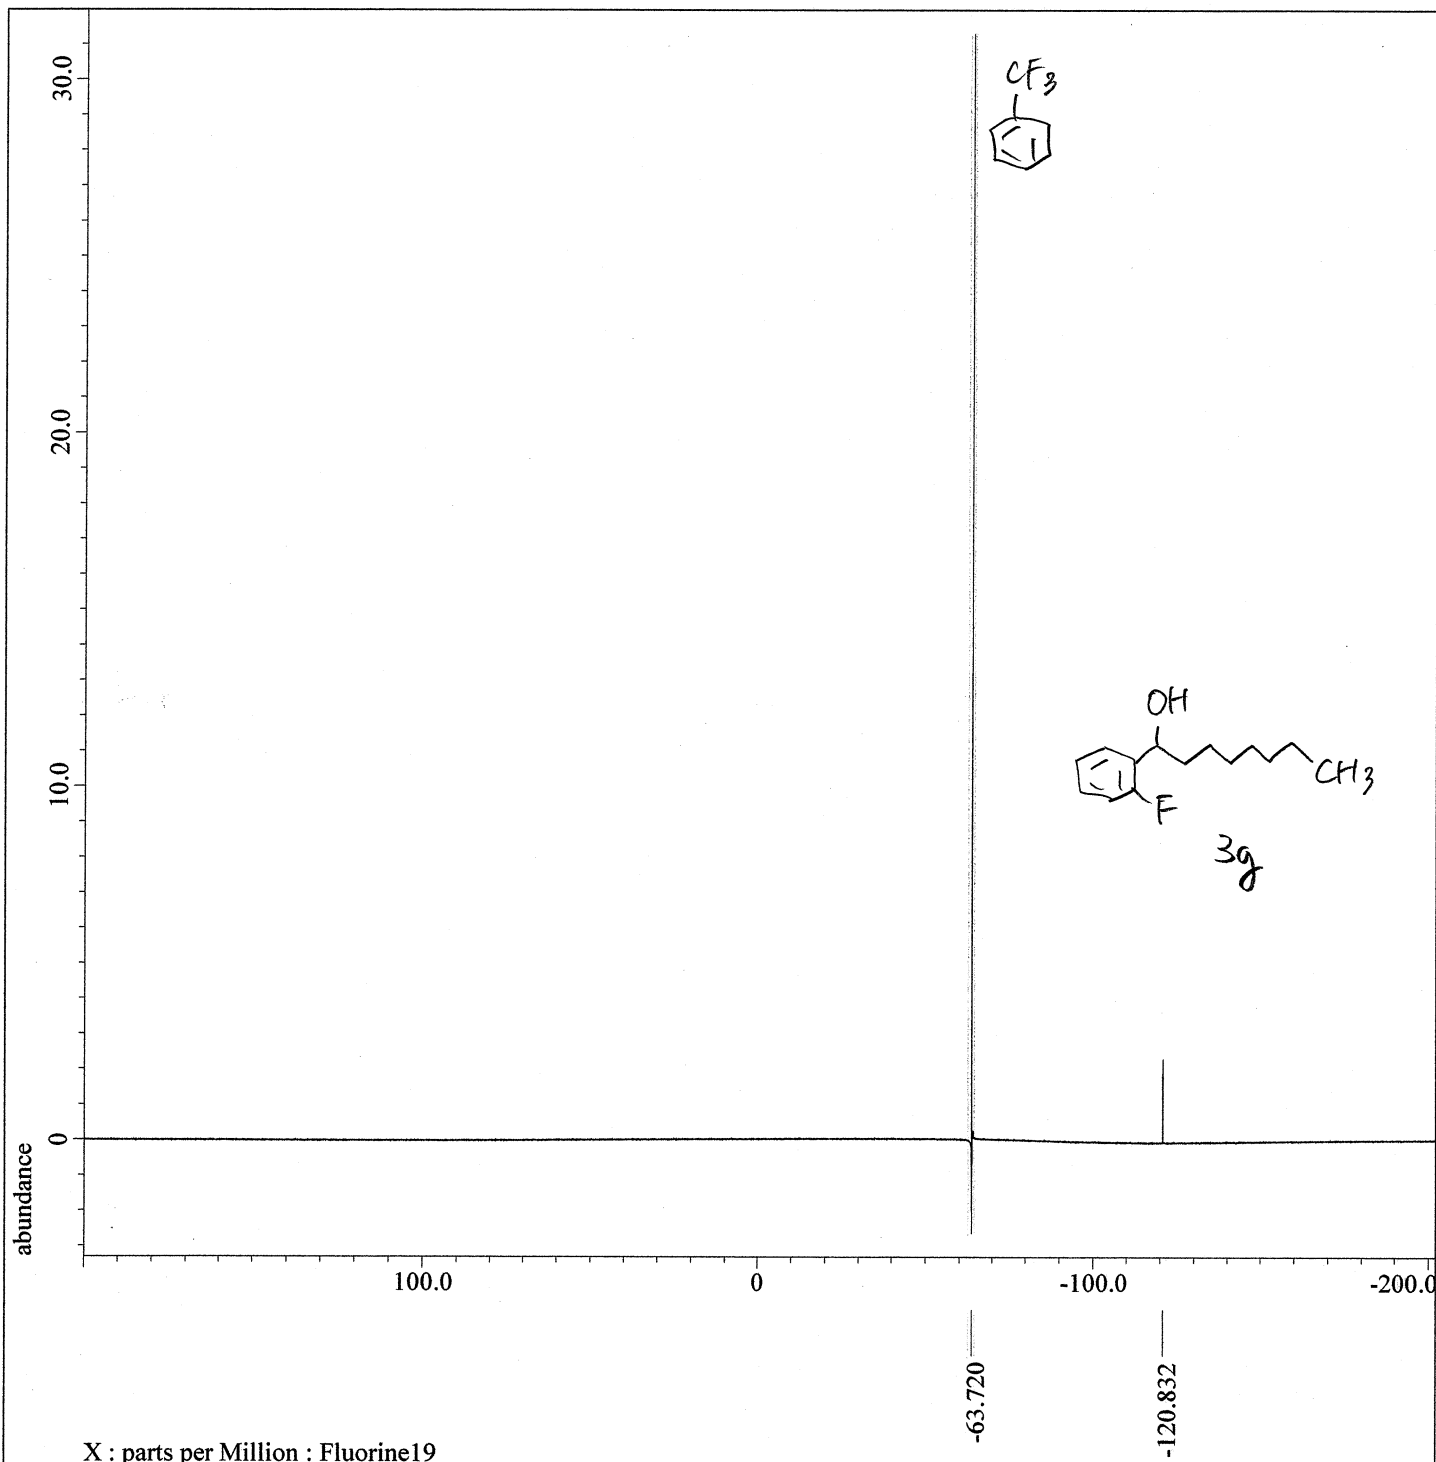

----- PROCESSING PARAMETERS -----  
 dc\_balance( 0, FALSE )  
 sexp( 0.2[Hz], 0.0[s] )  
 trapezoid( 0[%], 0[%], 80[%], 100[%] )  
 zerofill( 1 )  
 fft( 1, TRUE, TRUE )  
 machinephase  
 ppm  
 phase( -35, 0, 50[%] )

以下に由来: TKH-1575\_F\_standard\_single\_pulse

Filename = TKH-1575\_F\_standard\_sing  
 Author = element  
 Experiment = single\_pulse.jxp  
 Sample\_Id = TKH-1575\_F\_standard  
 Solvent = CHLOROFORM-D  
 Creation\_Time = 5-MAR-2022 15:59:13  
 Revision\_Time = 5-MAR-2022 18:54:50  
 Current\_Time = 5-MAR-2022 18:54:54

Comment = single\_pulse  
 Data\_Format = 1D\_COMPLEX  
 Dim\_Size = 13107  
 Dim\_Title = Fluorine19  
 Dim\_Units = [ppm]  
 Dimensions = X  
 Spectrometer = DELTA2\_NMR

Field\_Strength = 9.4073814[T] (400[MHz])  
 X\_Acq\_Duration = 86.50752[ms]  
 X\_Domain = 19F  
 X\_Freq = 376.87675879[MHz]  
 X\_Offset = 0[ppm]  
 X\_Points = 16384  
 X\_Prescans = 1  
 X\_Resolution = 11.55968868[Hz]  
 X\_Sweep = 189.39393939[kHz]  
 X\_Sweep\_Clipped = 151.51515152[kHz]  
 Irr\_Domain = Fluorine19  
 Irr\_Freq = 376.87675879[MHz]  
 Irr\_Offset = 5[ppm]  
 Tri\_Domain = Fluorine19  
 Tri\_Freq = 376.87675879[MHz]  
 Tri\_Offset = 5[ppm]  
 Clipped = FALSE  
 Scans = 8  
 Total\_Scans = 8

Relaxation\_Delay = 5[s]  
 Recvr\_Gain = 44  
 Temp\_Get = 18.8[dC]  
 X\_90\_Width = 6.8[us]  
 X\_Acq\_Time = 86.50752[ms]  
 X\_Angle = 45[deg]  
 X\_Atn = 3[dB]  
 X\_Pulse = 3.4[us]  
 Irr\_Mode = Off  
 Tri\_Mode = Off  
 Dante\_Presat = FALSE  
 Initial\_Wait = 1[s]  
 Repetition\_Time = 5.08650752[s]



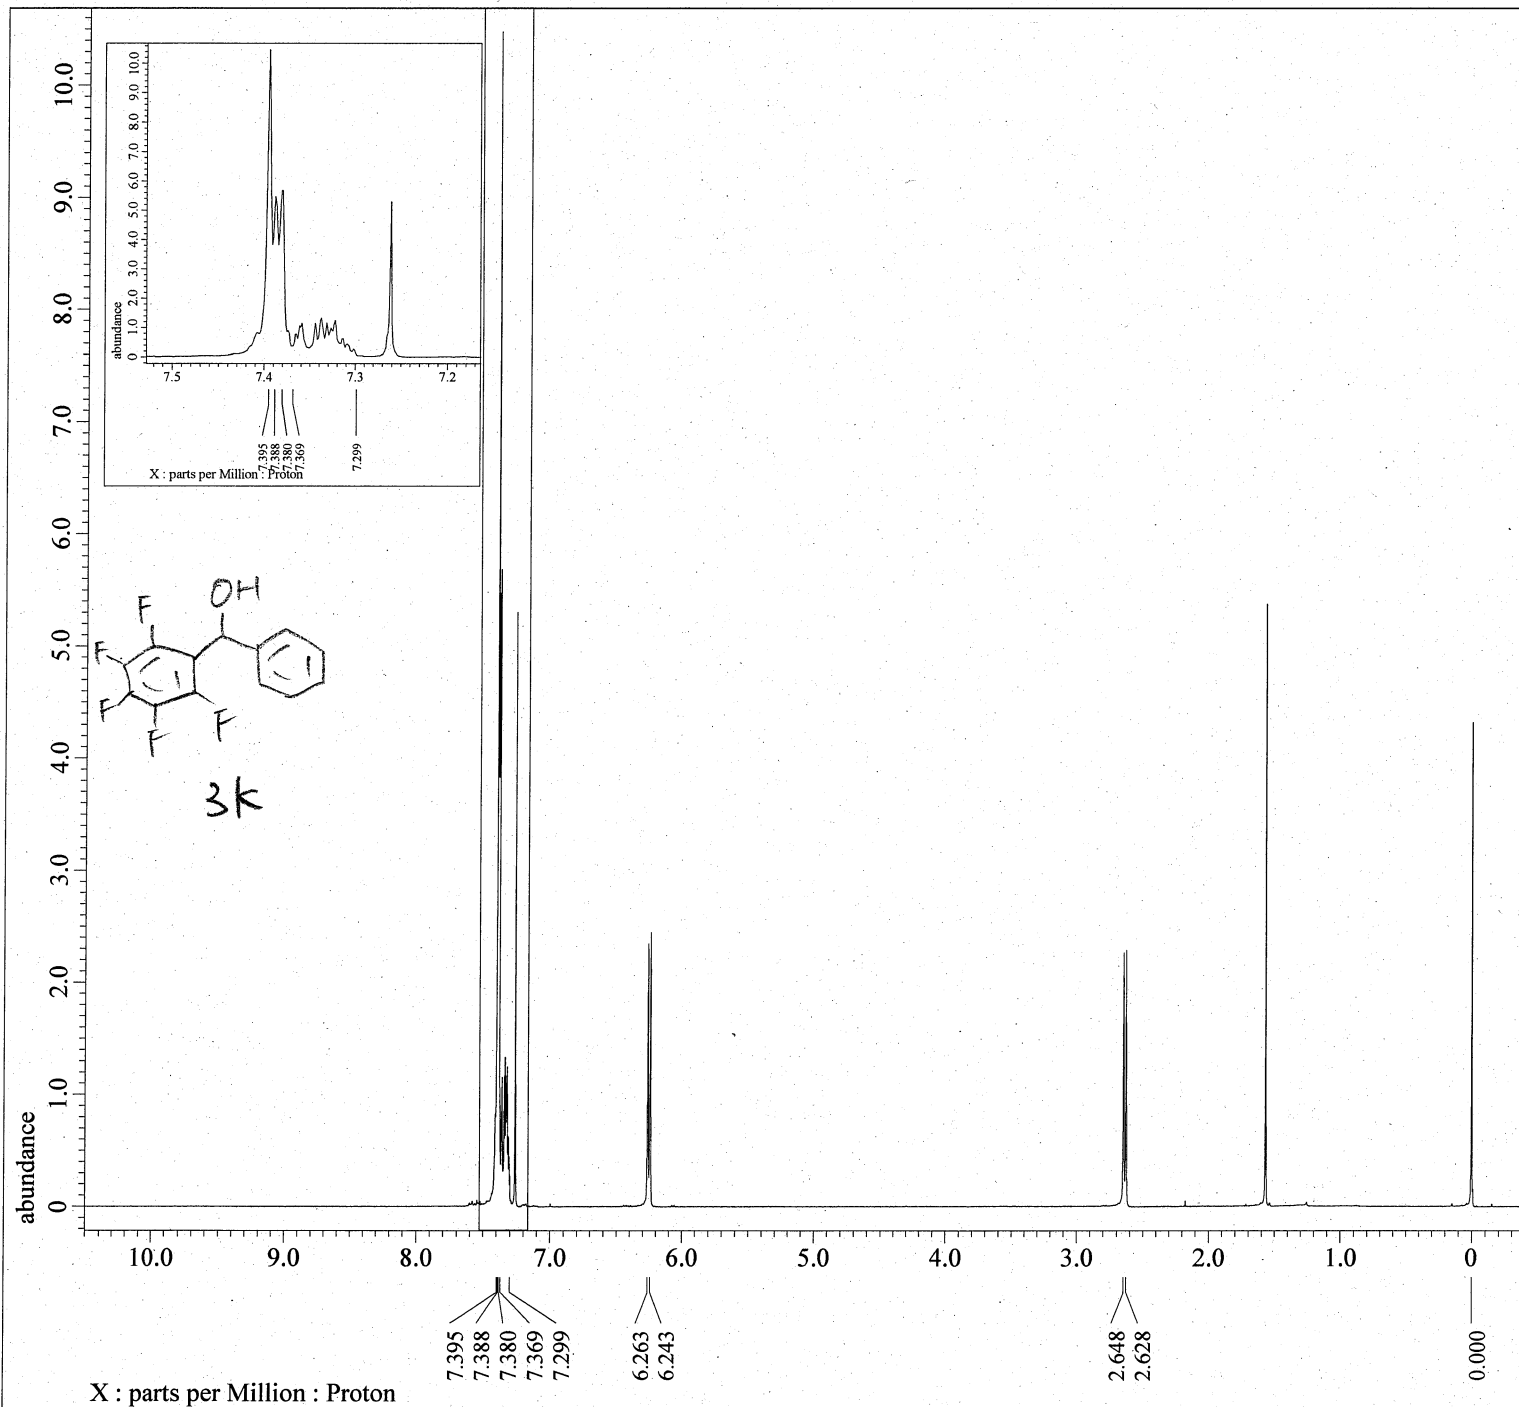

```

---- PROCESSING PARAMETERS ----
dc_balance( 0, FALSE )
sexp( 0.2[Hz], 0.0[s] )
trapezoid( 0[%], 0[%], 80[%], 100[%] )
zerofill( 1 )
fft( 1, TRUE, TRUE )
machinephase
ppm

以下に由来:: TKH-1571_H_Proton-1-1.jdf

Filename      = TKH-1571_H_Proton-1-2.jdf
Author        = element
Experiment     = proton.jxp
Sample_Id     = TKH-1571_H
Solvent        = CHLOROFORM-D
Actual_Start_Time = 5-MAR-2022 20:54:45
Revision_Time  = 11-MAR-2022 10:47:05

Comment       = single_pulse
Data_Format   = 1D COMPLEX
Dim_Size      = 13107
X_Domain      = Proton
Dim_Title     = Proton
Dim_Units     = [ppm]
Dimensions    = X
Spectrometer  = DELTA2_NMR

Field_Strength = 9.4073814[T] (400[MHz])
X_Acq_Duration = 2.18103808[s]
X_Domain       = 1H
X_Freq         = 400.53219825[MHz]
X_Offset       = 5[ppm]
X_Points       = 16384
X_Prescans     = 1
X_Resolution   = 0.45849727[Hz]
X_Sweep        = 7.51201923[kHz]
X_Sweep_Clippped = 6.00961538[kHz]
Irr_Domain     = Proton
Irr_Freq       = 400.53219825[MHz]
Irr_Offset     = 5[ppm]
Tri_Domain     = Proton
Tri_Freq       = 400.53219825[MHz]
Tri_Offset     = 5[ppm]
Clipped        = FALSE
Scans          = 8
Total_Scans    = 8

Relaxation_Delay = 5[s]
Recvr_Gain       = 48
Temp_Get        = 18[dC]
X_90_Width      = 6[us]
X_Acq_Time      = 2.18103808[s]
X_Angle         = 45[deg]
X_Atn           = 0.8[dB]
X_Pulse         = 3[us]
Irr_Mode        = Off
Tri_Mode        = Off
Dante_Presat    = FALSE
Initial_Wait    = 1[s]
Repetition_Time = 7.18103808[s]

```

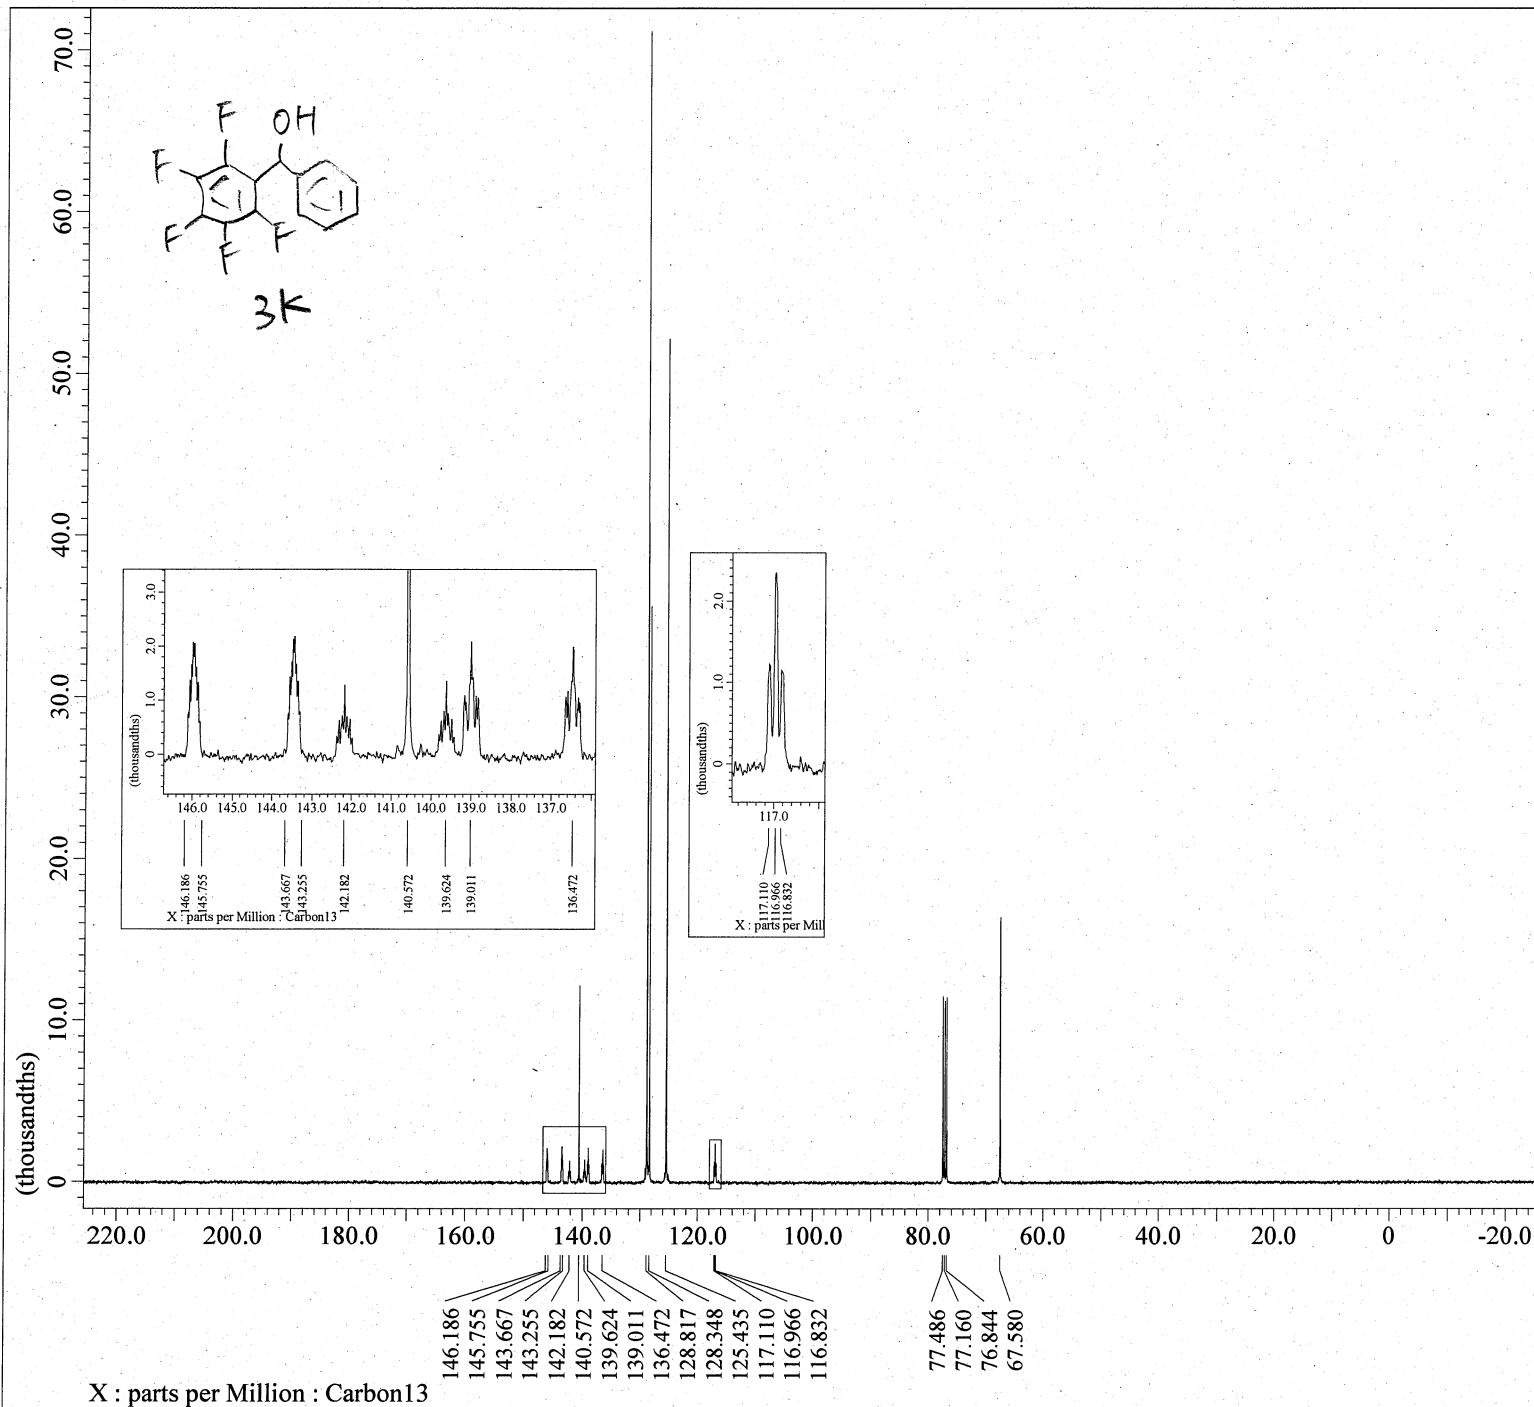

```

----- PROCESSING PARAMETERS -----
sexp( 2.0[Hz], 0.0[s] )
trapezoid( 0[%], 0[%], 80[%], 100[%] )
zerofill( 1 )
fft( 1, TRUE, TRUE )
machinephase
ppm

```

以下に由来: TKH-1571\_carbon-1-1.jdf

```

Filename      = TKH-1571_carbon-1-
Author        = element
Experiment    = carbon.jxp
Sample_Id     = TKH-1571
Solvent       = CHLOROFORM-D
Actual_Start_Time = 8-MAR-2022 13:31:
Revision_Time = 11-MAR-2022 10:49:

```

```

Comment      = single pulse decou
Data Format    = 1D COMPLEX
Dim_Size      = 26214
X_Domain      = Carbon13
Dim_Title     = Carbon13
Dim_Units     = [ppm]
Dimensions    = X
Spectrometer  = DELTA2_NMR

```

```

Field_Strength = 9.2982153[T] (400[
X_Acq_Duration = 1.048576[s]
X_Domain       = Carbon13
X_Freq         = 99.54517646[MHz]
X_Offset       = 100[ppm]
X_Points       = 32768
X_Prescans     = 4
X_Resolution   = 0.95367432[Hz]
X_Sweep        = 31.25[kHz]
X_Sweep_Clipped = 25[kHz]
Irr_Domain     = Proton
Irr_Freq       = 395.88430144[MHz]
Irr_Offset     = 5[ppm]
Blanking       = 5[us]
Clipped        = TRUE
Scans          = 400
Total_Scans    = 400

```

```

Relaxation_Delay = 2[s]
Recvr_Gain       = 50
Temp_Get         = 17.9[dC]
X_90_Width       = 9.65[us]
X_Acq_Time       = 1.048576[s]
X_Angle          = 30[deg]
X_Atn            = 8[dB]
X_Pulse          = 3.21666667[us]
Irr_Atn_Dec      = 25.059[dB]
Irr_Atn_Dec_Calc = 25.059[dB]
Irr_Atn_Dec_Default_Calc = 25.059[dB]
Irr_Atn_Noise    = 25.059[dB]
Irr_Dec_Bandwidth_Hz = 4.7826087[kHz]
Irr_Dec_Bandwidth_Ppm = 12.08082432[ppm]
Irr_Dec_Freq     = 395.88430144[MHz]
Irr_Dec_Merit_Factor = 2.2
Irr_Decoupling   = TRUE
Irr_Noise        = WALTZ
Irr_Offset_Default = 5[ppm]

```

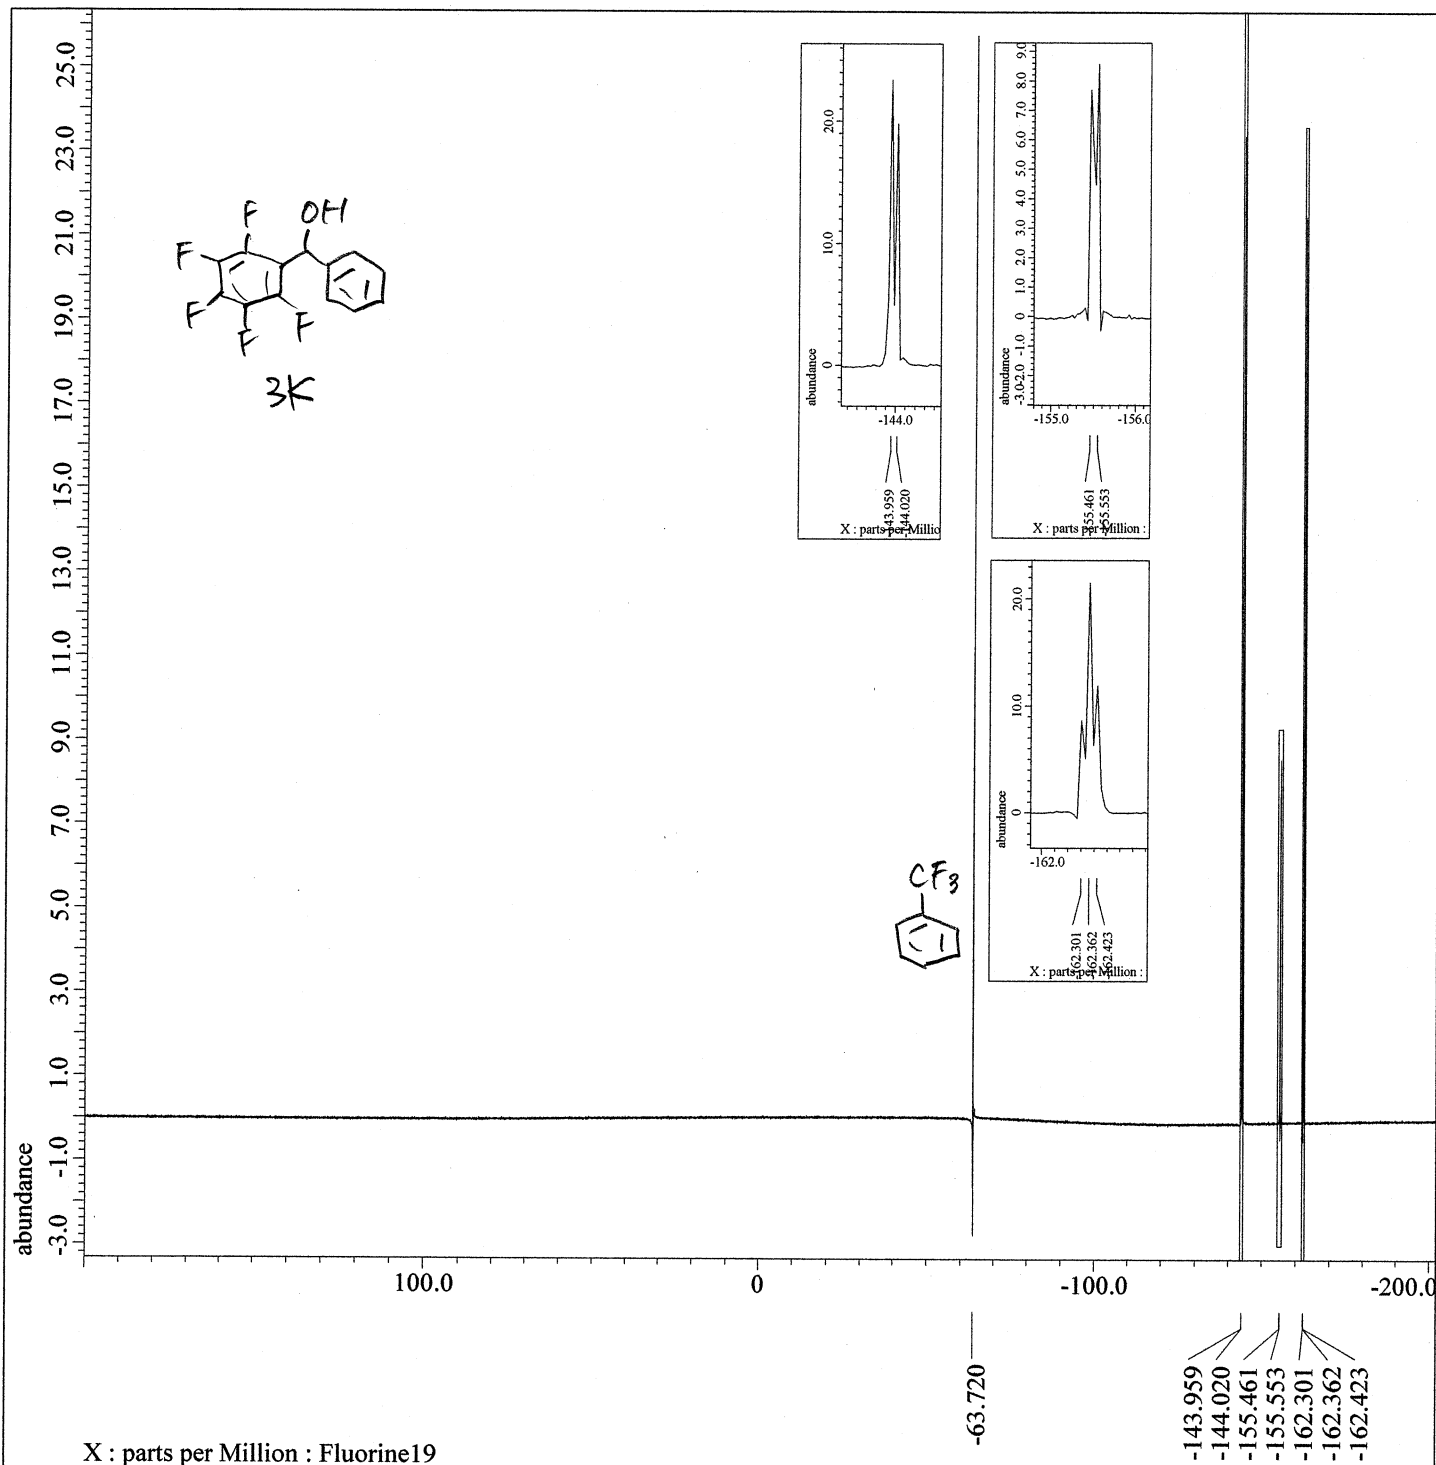

----- PROCESSING PARAMETERS -----  
 dc\_balance( 0, FALSE )  
 sexp( 0.2[Hz], 0.0[s] )  
 trapezoid( 0[%], 0[%], 80[%], 100[%] )  
 zerofill( 1 )  
 fft( 1, TRUE, TRUE )  
 machinephase  
 ppm  
 phase( 25, 0, 50[%] )

以下に由来: TKH-1571\_F\_standard\_single\_pulse

Filename = TKH-1571\_F\_standard\_sing  
 Author = element  
 Experiment = single\_pulse.jxp  
 Sample\_Id = TKH-1571\_F\_standard  
 Solvent = CHLOROFORM-D  
 Creation\_Time = 5-MAR-2022 21:28:28  
 Revision\_Time = 5-MAR-2022 21:01:48  
 Current\_Time = 5-MAR-2022 21:02:39

Comment = single\_pulse  
 Data\_Format = 1D\_COMPLEX  
 Dim\_Size = 13107  
 Dim\_Title = Fluorine19  
 Dim\_Units = [ppm]  
 Dimensions = X  
 Spectrometer = DELTA2\_NMR

Field\_Strength = 9.4073814[T] (400[MHz])  
 X\_Acq\_Duration = 86.50752[ms]  
 X\_Domain = 19F  
 X\_Freq = 376.87675879[MHz]  
 X\_Offset = 0[ppm]  
 X\_Points = 16384  
 X\_Prescans = 1  
 X\_Resolution = 11.55968868[Hz]  
 X\_Sweep = 189.39393939[kHz]  
 X\_Sweep\_Clippped = 151.51515152[kHz]  
 Irr\_Domain = Fluorine19  
 Irr\_Freq = 376.87675879[MHz]  
 Irr\_Offset = 5[ppm]  
 Tri\_Domain = Fluorine19  
 Tri\_Freq = 376.87675879[MHz]  
 Tri\_Offset = 5[ppm]  
 Clipped = FALSE  
 Scans = 8  
 Total\_Scans = 8

Relaxation\_Delay = 5[s]  
 Recvr\_Gain = 46  
 Temp\_Get = 18.8[dC]  
 X\_90\_Width = 6.8[us]  
 X\_Acq\_Time = 86.50752[ms]  
 X\_Angle = 45[deg]  
 X\_Atn = 3[dB]  
 X\_Pulse = 3.4[us]  
 Irr\_Mode = Off  
 Tri\_Mode = Off  
 Dante\_Presat = FALSE  
 Initial\_Wait = 1[s]  
 Repetition\_Time = 5.08650752[s]

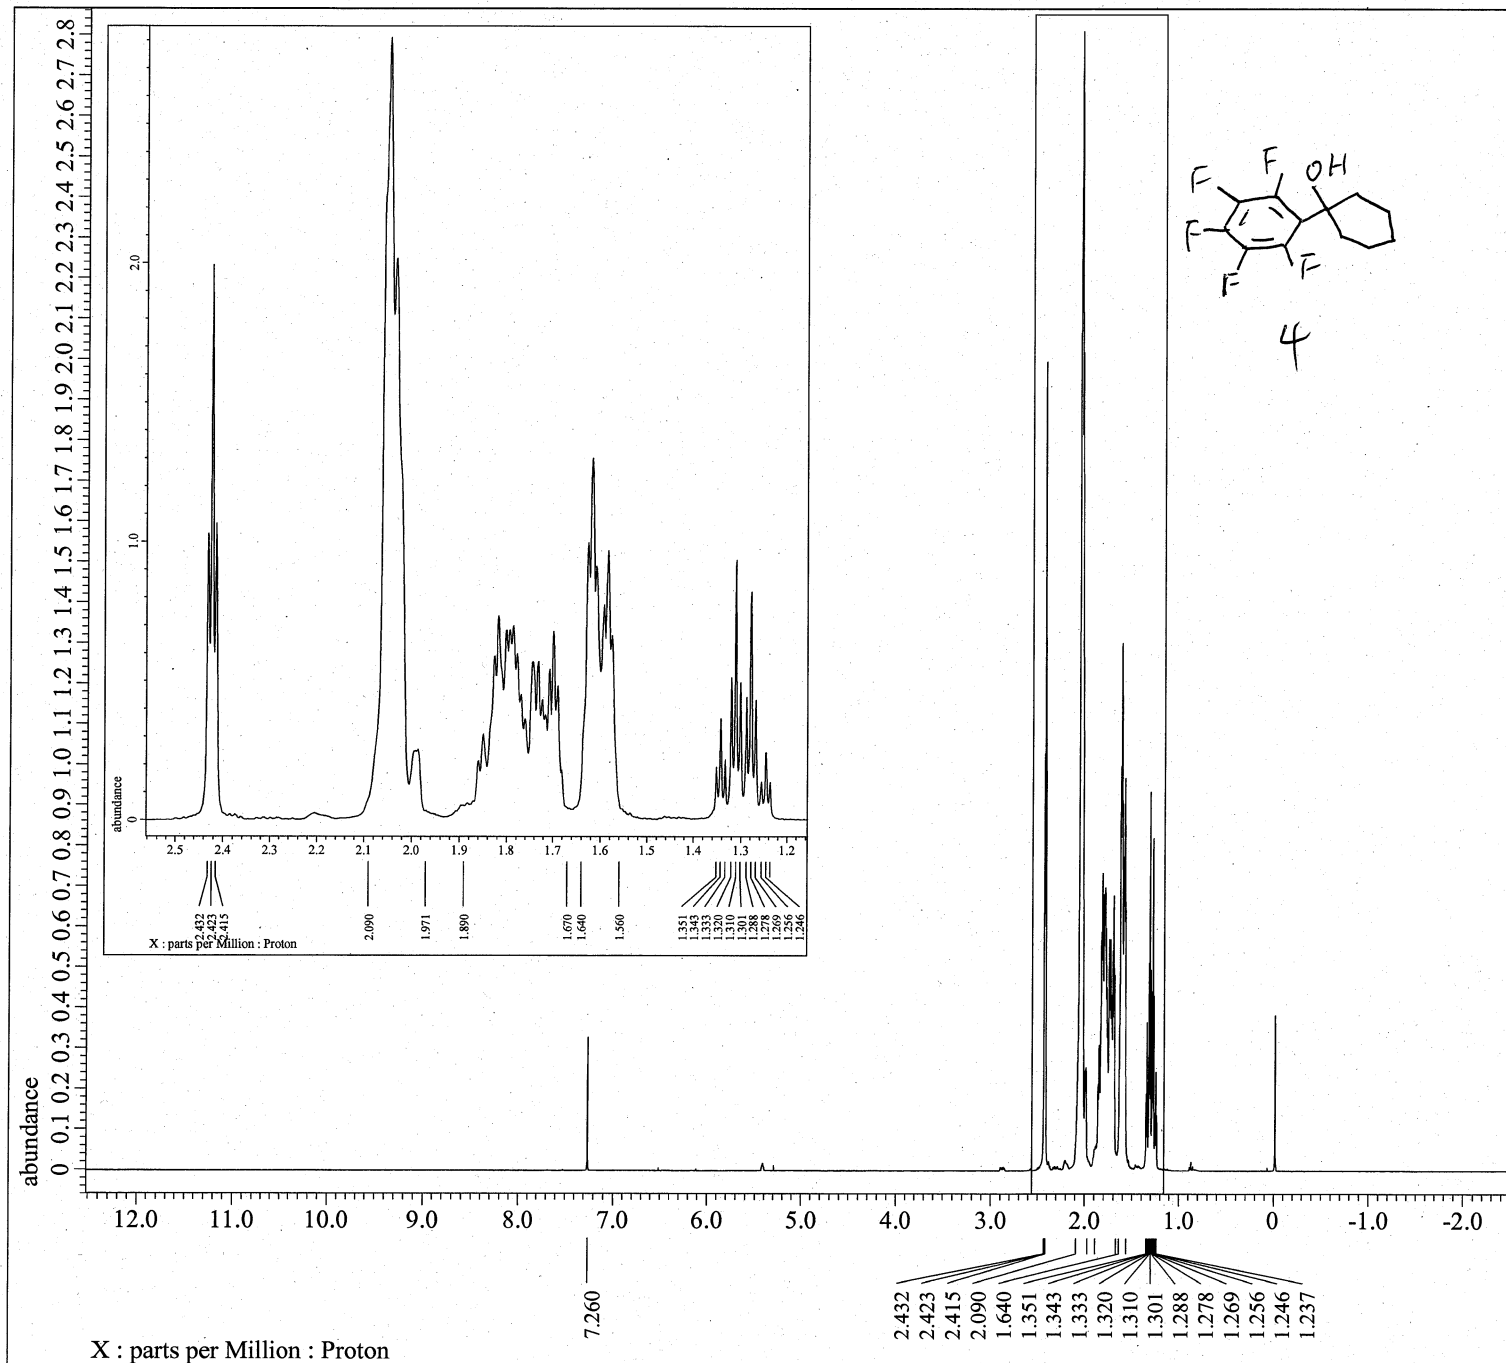

----- PROCESSING PARAMETERS -----

```

dc_balance( 0, FALSE )
sexp( 0.2[Hz], 0.0[s] )
trapezoid( 0[%], 0[%], 80[%], 100[%] )
zerofill( 1, TRUE )
fft( 1, TRUE, TRUE )
machinephase
ppm

```

---

Filename = 20220521gp644\_Proton  
 Author = element  
 Experiment = proton.jxp  
 Sample Id = 20220521gp644  
 Solvent = CHLOROFORM-D  
 Actual\_Start\_Time = 21-MAY-2022 17:13:04  
 Revision\_Time = 26-MAY-2022 09:37:24

---

Comment = single\_pulse  
 Data\_Format = 1D COMPLEX  
 Dim\_Size = 13107  
 X\_Domain = Proton  
 Dim\_Title = Proton  
 Dim\_Units = [ppm]  
 Dimensions = X  
 Site = JNM-ECS400  
 Spectrometer = DELTA2\_NMR

---

Field\_Strength = 9.37221[T] (400[MHz])  
 X\_Acq\_Duration = 2.1889024[s]  
 X\_Domain = 1H  
 X\_Freq = 399.03472754[MHz]  
 X\_Offset = 5.0[ppm]  
 X\_Points = 16384  
 X\_Prescans = 1  
 X\_Resolution = 0.45684997[Hz]  
 X\_Sweep = 7.48502994[kHz]  
 X\_Sweep\_Clipped = 5.98802395[kHz]  
 Irr\_Domain = Proton  
 Irr\_Freq = 399.03472754[MHz]  
 Irr\_Offset = 5.0[ppm]  
 Tri\_Domain = Proton  
 Tri\_Freq = 399.03472754[MHz]  
 Tri\_Offset = 5.0[ppm]  
 Clipped = FALSE  
 Scans = 8  
 Total\_Scans = 8

---

Relaxation\_Delay = 5[s]  
 Recvr\_Gain = 22  
 Temp\_Get = 17.7[dC]  
 X\_90\_Width = 6.6[us]  
 X\_Acq\_Time = 2.1889024[s]  
 X\_Angle = 45[deg]  
 X\_Atn = 1[dB]  
 X\_Pulse = 3.3[us]  
 Irr\_Mode = Off  
 Tri\_Mode = Off  
 Dante\_Preset = FALSE  
 Initial\_Wait = 1[s]  
 Repetition\_Time = 7.1889024[s]

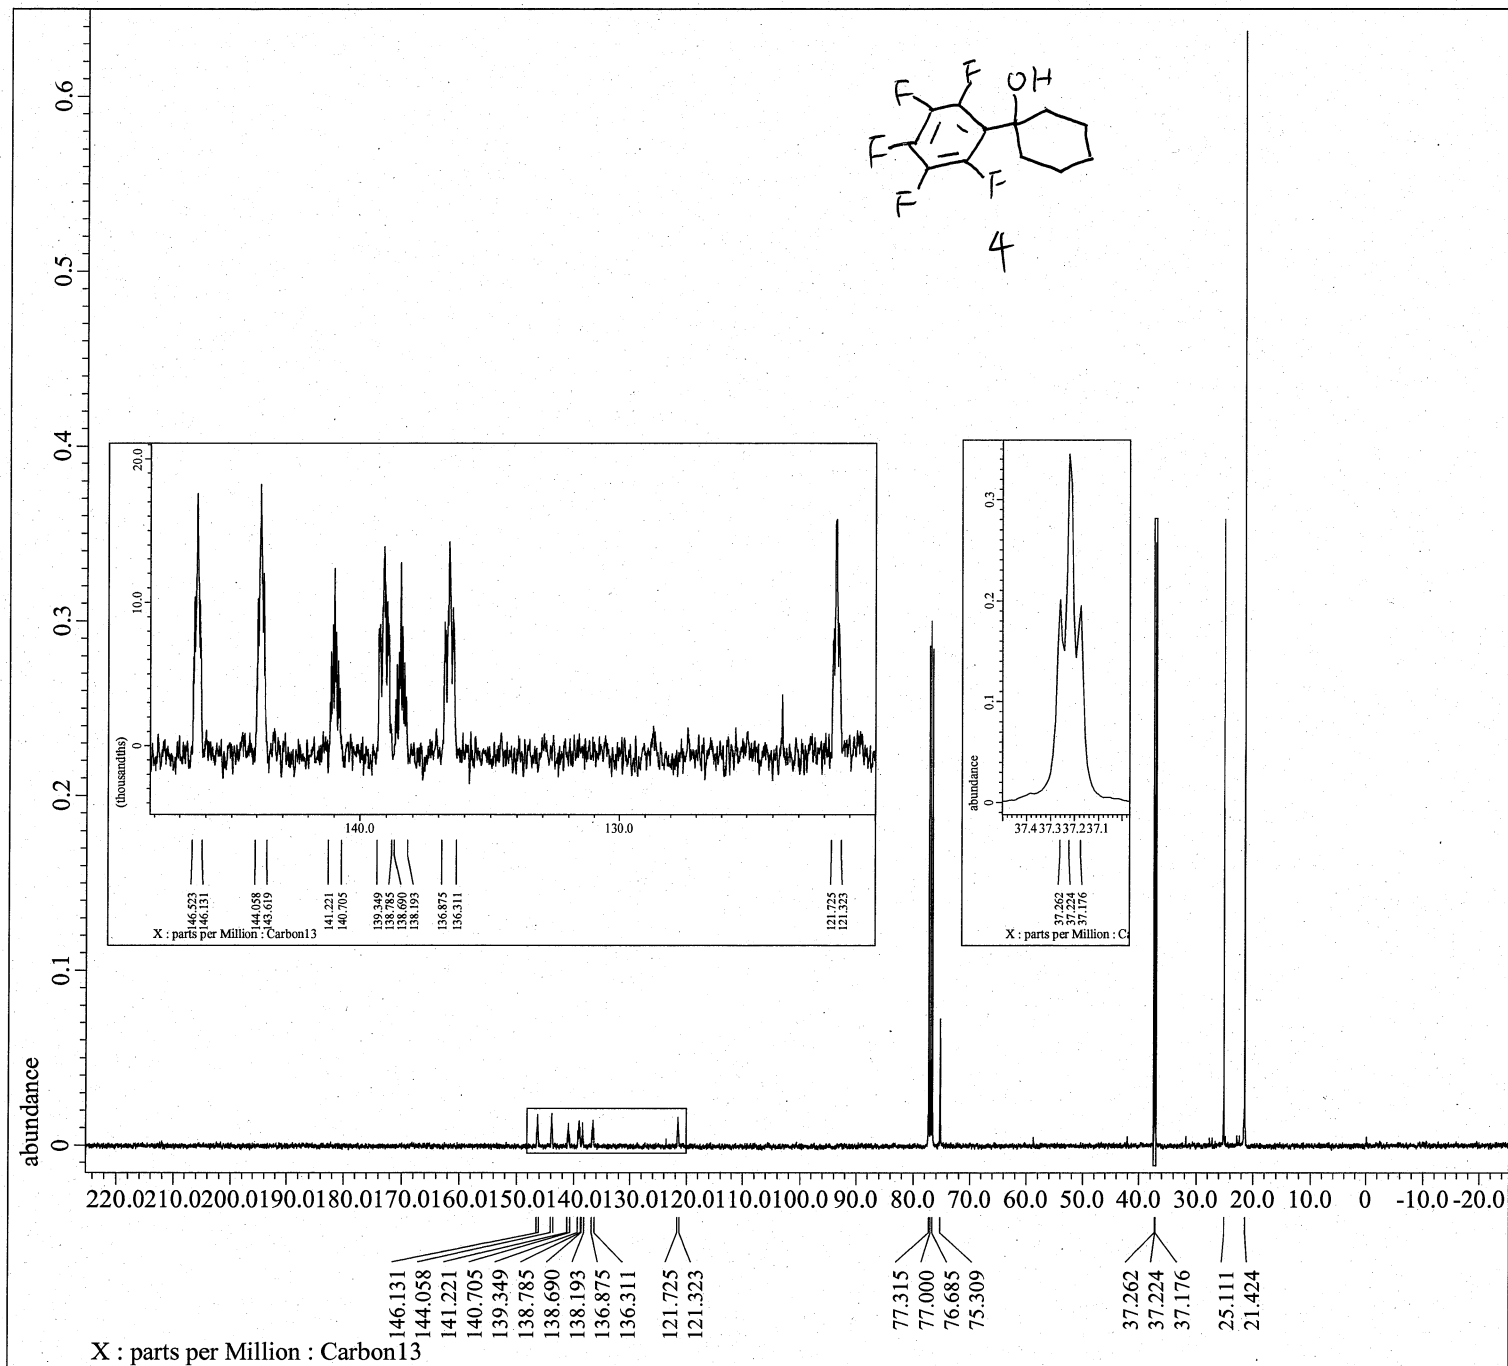

```

---- PROCESSING PARAMETERS ----
dc_balance( 0, FALSE )
sexp( 2.0[Hz], 0.0[s] )
trapezoid( 0[%], 0[%], 80[%], 100[%] )
zerofill( 1, TRUE )
fft( 1, TRUE, TRUE )
machinephase
ppm
  
```

数据来源: 20220521gp644\_Carbon-1-1.jdf

```

Filename      = 20220521gp644_Carbon
Author        = element
Experiment    = carbon.jxp
Sample Id     = 20220521gp644
Solvent       = CHLOROFORM-D
Actual_Start_Time = 21-MAY-2022 17:14:24
Revision_Time  = 25-MAY-2022 19:57:28
  
```

```

Comment       = single pulse decoupl
Data_Format   = 1D COMPLEX
Dim_Size      = 26214
X_Domain      = Carbon
Dim_Title     = Carbon13
Dim_Units     = [ppm]
Dimensions    = X
Site          = JNM-ECS400
Spectrometer   = DELTA2_NMR
  
```

```

Field_Strength = 9.37221[T] (400[MHz])
X_Acq_Duration = 1.04333312[s]
X_Domain       = 13C
X_Freq         = 100.33735165[MHz]
X_Offset       = 100.0[ppm]
X_Points       = 32768
X_Prescans     = 4
X_Resolution   = 0.95846665[Hz]
X_Sweep        = 31.40703518[kHz]
X_Sweep_Clippped = 25.12562814[kHz]
Irr_Domain     = Proton
Irr_Freq       = 399.03472754[MHz]
Irr_Offset     = 5.0[ppm]
Clipped        = FALSE
Scans          = 1024
Total_Scans    = 1024
  
```

```

Relaxation_Delay = 2[s]
Recvr_Gain       = 50
Temp_Get         = 17.7[dC]
X_90_Width       = 10.9[us]
X_Acq_Time       = 1.04333312[s]
X_Angle          = 30[deg]
X_Atn            = 5.4[dB]
X_Pulse          = 3.63333333[us]
Irr_Atn_Dec      = 25.823[dB]
Irr_Atn_No     = 25.823[dB]
Irr_Noise       = WALTZ
Irr_Pwidth      = 0.115[ms]
Decoupling       = TRUE
Initial_Wait     = 1[s]
Noe              = TRUE
Noe_Time         = 2[s]
Repetition_Time  = 3.04333312[s]
  
```

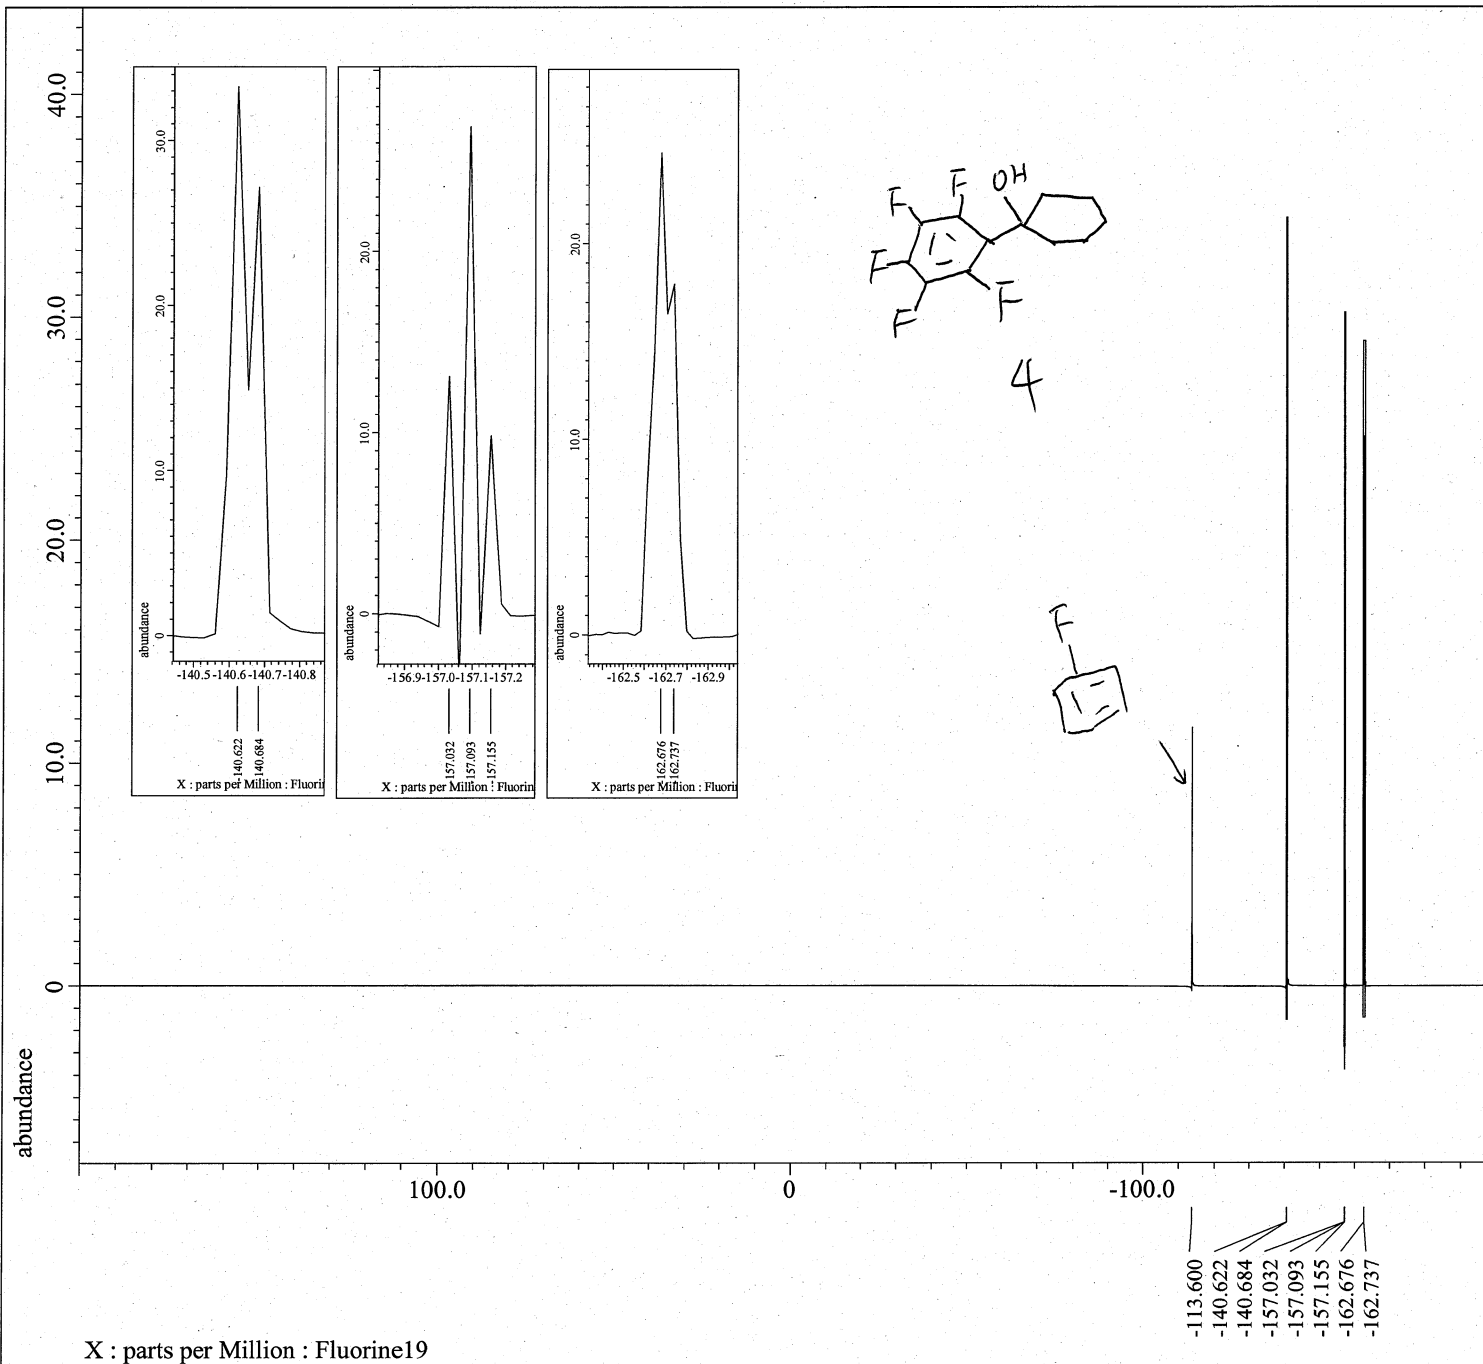

```

---- PROCESSING PARAMETERS ----
dc_balance( 0, FALSE )
sexp( 0.2[Hz], 0.0[s] )
trapezoid( 0[%], 0[%], 80[%], 100[%] )
zerofill( 1, TRUE )
fft( 1, TRUE, TRUE )
machinephase
ppm

数据来源: 20220521gp644_single_pulse-1-1

Filename      = 20220521gp644_single
Author        = element
Experiment     = single_pulse.jxp
Sample_Id     = 20220521gp644
Solvent       = CHLOROFORM-D
Actual_Start_Time = 21-MAY-2022 18:05:28
Revision_Time  = 25-MAY-2022 20:46:00

Comment       = single_pulse
Data_Format   = 1D_COMPLEX
Dim_Size      = 13107
X_Domain      = Fluorine
Dim_Title     = Fluorine19
Dim_Units     = [ppm]
Dimensions    = X
Spectrometer  = DELTA2_NMR

Field_Strength = 9.4073814[T] (400[MH
X_Acq_Duration = 86.50752[ms]
X_Domain       = 19F
X_Freq         = 376.87675879[MHz]
X_Offset       = 0[ppm]
X_Points       = 16384
X_Prescans     = 1
X_Resolution   = 11.55968868[Hz]
X_Sweep        = 189.39393939[kHz]
X_Sweep_Clippped = 151.51515152[kHz]
Irr_Domain     = Fluorine19
Irr_Freq       = 376.87675879[MHz]
Irr_Offset     = 5[ppm]
Tri_Domain     = Fluorine19
Tri_Freq       = 376.87675879[MHz]
Tri_Offset     = 5[ppm]
Clipped        = FALSE
Scans          = 8
Total_Scans    = 8

Relaxation_Delay = 5[s]
Recvr_Gain       = 30
Temp_Get         = 19.1[dC]
X_90_Width      = 6.8[us]
X_Acq_Time      = 86.50752[ms]
X_Angle         = 45[deg]
X_Atn           = 3[dB]
X_Pulse         = 3.4[us]
Irr_Mode        = Off
Tri_Mode        = Off
Dante_Preset    = FALSE
Initial_Wait    = 1[s]
Repetition_Time = 5.08650752[s]

```

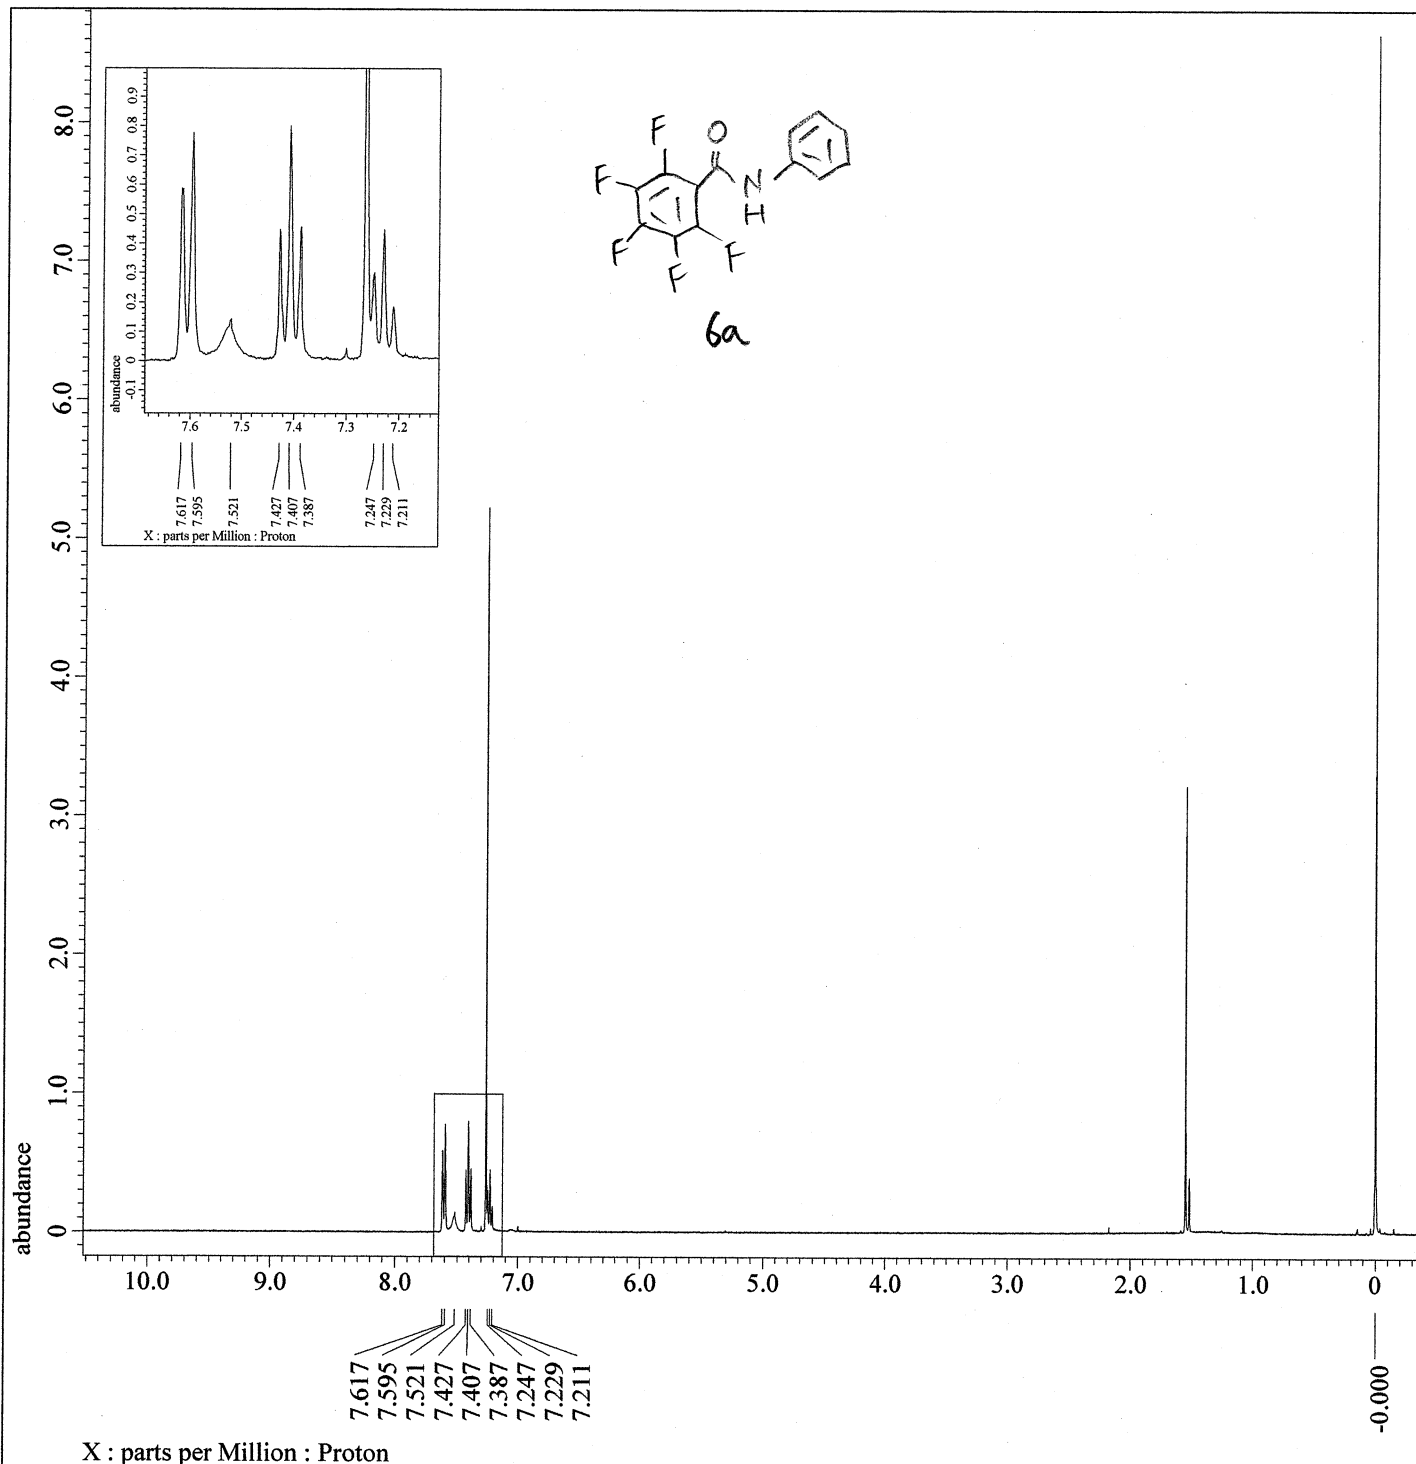

```

---- PROCESSING PARAMETERS ----
dc_balance( 0, FALSE )
sexp( 0.2[Hz], 0.0[s] )
trapezoid( 0[%], 0[%], 80[%], 100[%] )
zerofill( 1 )
fft( 1, TRUE, TRUE )
machinephase
ppm
phase( 3, 0, 50[%] )

以下に由来: TKH-1510_H_proton-1-1.jdf

Filename      = TKH-1510_H_proton-1-4.jc
Author        = element
Experiment     = proton.jpg
Sample Id     = TKH-1510 H
Solvent       = CHLOROFORM-D
Creation Time  = 14-MAR-2022 15:26:11
Revision Time = 14-MAR-2022 15:02:38
Current Time  = 14-MAR-2022 15:02:40

Comment       = single_pulse
Data Format    = 1D_COMPLEX
Dim_Size      = 13107
Dim_Title     = Proton
Dim_Units     = [ppm]
Dimensions    = X
Spectrometer  = DELTA2_NMR

Field Strength = 9.4073814[T] (400[MHz])
X Acq Duration = 2.18103808[s]
X Domain      = 1H
X Freq        = 400.53219825[MHz]
X Offset      = 5[ppm]
X Points      = 16384
X Prescans    = 1
X Resolution  = 0.45849727[Hz]
X Sweep       = 7.51201923[kHz]
X Sweep_Clip  = 6.00961538[kHz]
Irr_Domain    = Proton
Irr_Freq      = 400.53219825[MHz]
Irr_Offset    = 5[ppm]
Tri_Domain    = Proton
Tri_Freq      = 400.53219825[MHz]
Tri_Offset    = 5[ppm]
Clipped       = FALSE
Scans         = 8
Total_Scans   = 8

Relaxation_Delay = 5[s]
Recvr Gain      = 50
Temp_Get        = 18.7[dc]
X 90 Width     = 6[us]
X Acq Time     = 2.18103808[s]
X Angle        = 45[deg]
X Atn          = 0.8[dB]
X Pulse        = 3[us]
Irr Mode       = Off
Tri Mode       = Off
Dante_Presat   = FALSE
Initial Wait   = 1[s]
Repetition_Time = 7.18103808[s]
  
```

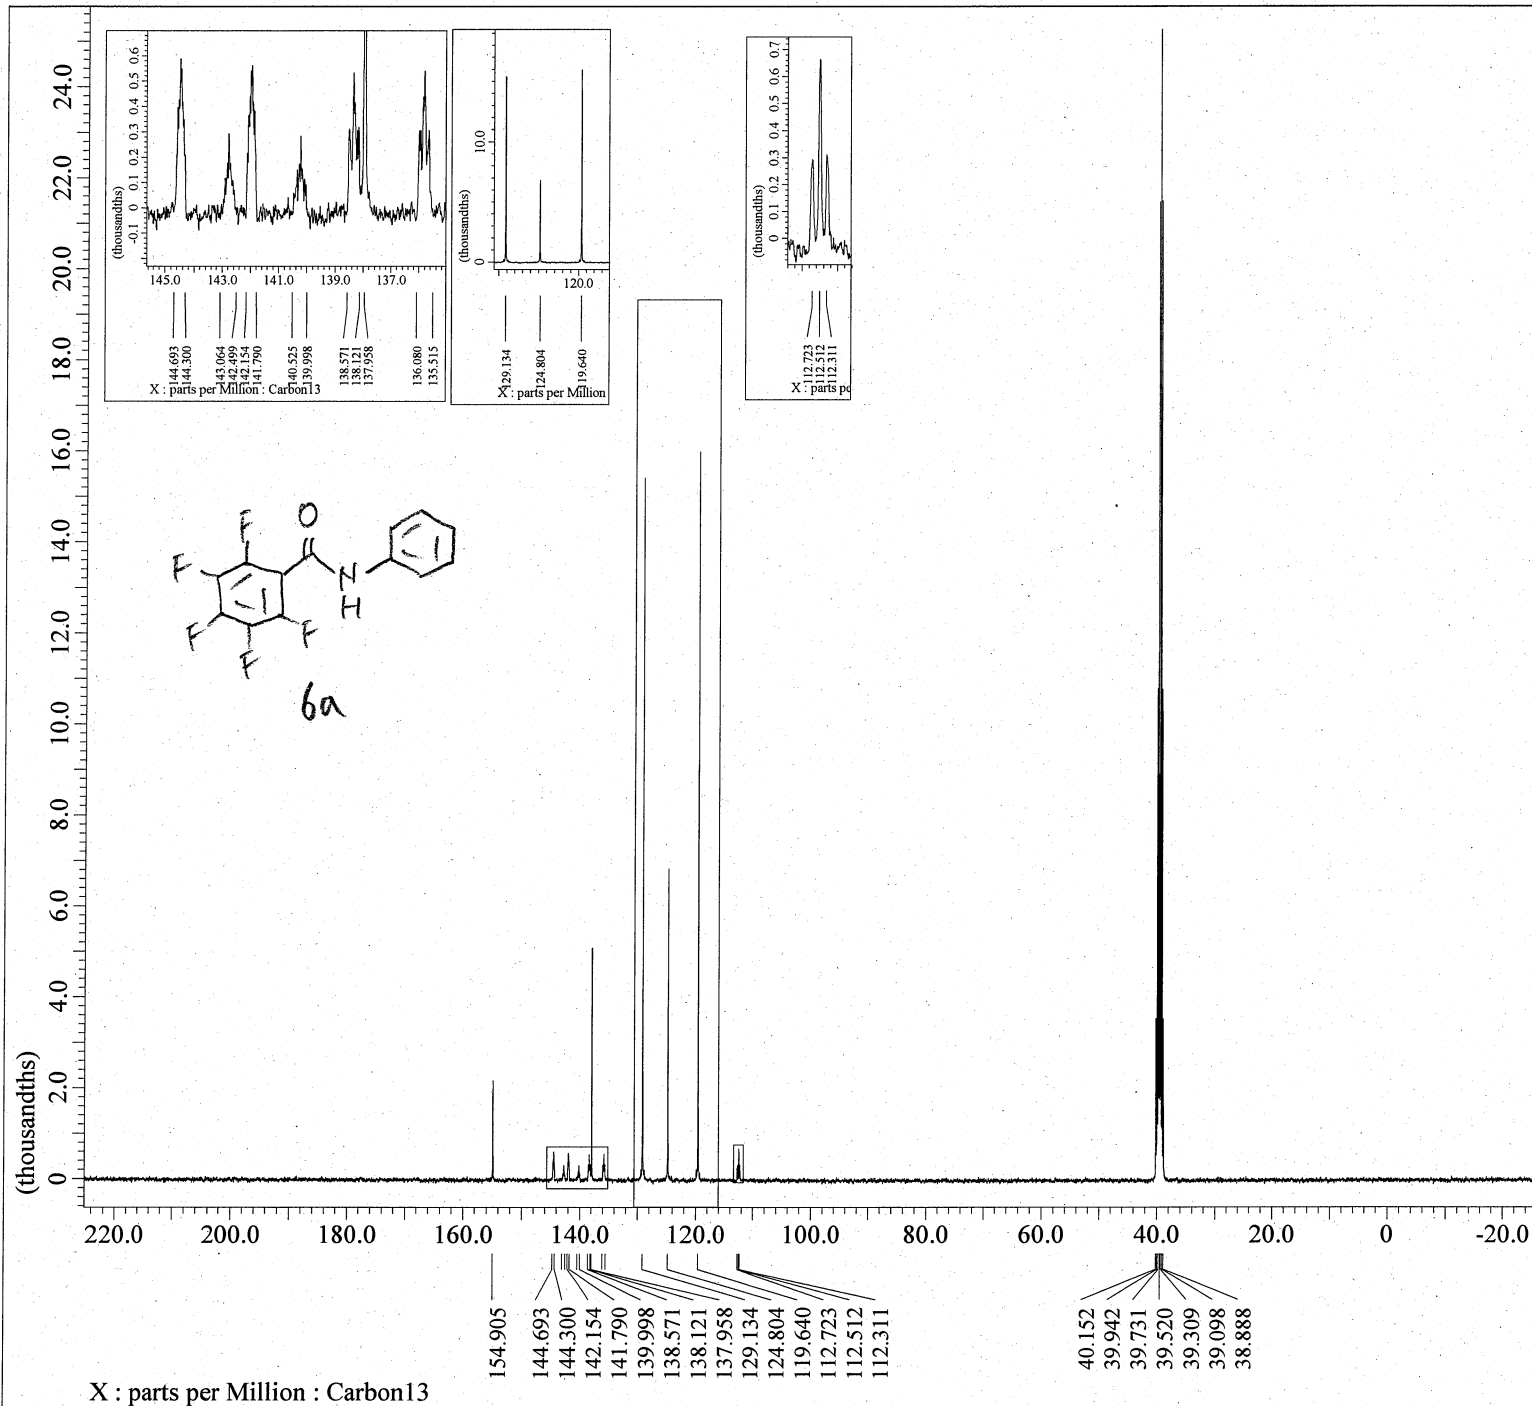

----- PROCESSING PARAMETERS -----  
 sexp( 2.0[Hz], 0.0[s] )  
 trapezoid( 0[%], 0[%], 80[%], 100[%] )  
 zerofill( 1 )  
 fft( 1, TRUE, TRUE )  
 machinephase  
 ppm

以下に由来: TKH-1510\_carbon-2-1.jdf

Filename = TKH-1510\_carbon-2-  
 Author = element  
 Experiment = carbon.jxp  
 Sample\_Id = TKH-1510  
 Solvent = DMSO-D6  
 Actual\_Start\_Time = 9-MAR-2022 10:46:  
 Revision\_Time = 10-MAR-2022 19:20:

Comment = single pulse decou  
 Data Format = 1D COMPLEX  
 Dim\_Size = 26214  
 X\_Domain = Carbon13  
 Dim\_Title = Carbon13  
 Dim\_Units = [ppm]  
 Dimensions = X  
 Spectrometer = DELTA2\_NMR

Field\_Strength = 9.2982153[T] (400[  
 X\_Acq\_Duration = 1.048576[s]  
 X\_Domain = Carbon13  
 X\_Freq = 99.54517646[MHz]  
 X\_Offset = 100[ppm]  
 X\_Points = 32768  
 X\_Prescans = 4  
 X\_Resolution = 0.95367432[Hz]  
 X\_Sweep = 31.25[kHz]  
 X\_Sweep\_Clippped = 25[kHz]  
 Irr\_Domain = Proton  
 Irr\_Freq = 395.88430144[MHz]  
 Irr\_Offset = 5[ppm]  
 Blanking = 5[us]  
 Clipped = TRUE  
 Scans = 1500  
 Total\_Scans = 1500

Relaxation\_Delay = 2[s]  
 Recvr\_Gain = 50  
 Temp\_Get = 17.8[dC]  
 X\_90\_Width = 9.65[us]  
 X\_Acq\_Time = 1.048576[s]  
 X\_Angle = 30[deg]  
 X\_Atn = 8[dB]  
 X\_Pulse = 3.21666667[us]  
 Irr\_Atn\_Dec = 25.059[dB]  
 Irr\_Atn\_Dec\_Calc = 25.059[dB]  
 Irr\_Atn\_Dec\_Default\_Calc = 25.059[dB]  
 Irr\_Atn\_No = 25.059[dB]  
 Irr\_Dec\_Bandwidth\_Hz = 4.7826087[kHz]  
 Irr\_Dec\_Bandwidth\_Ppm = 12.08082432[ppm]  
 Irr\_Dec\_Freq = 395.88430144[MHz]  
 Irr\_Dec\_Merit\_Factor = 2.2  
 Irr\_Decoupling = TRUE  
 Irr\_No = TRUE  
 Irr\_Noise = WALTZ  
 Irr\_Offset\_Default = 5[ppm]



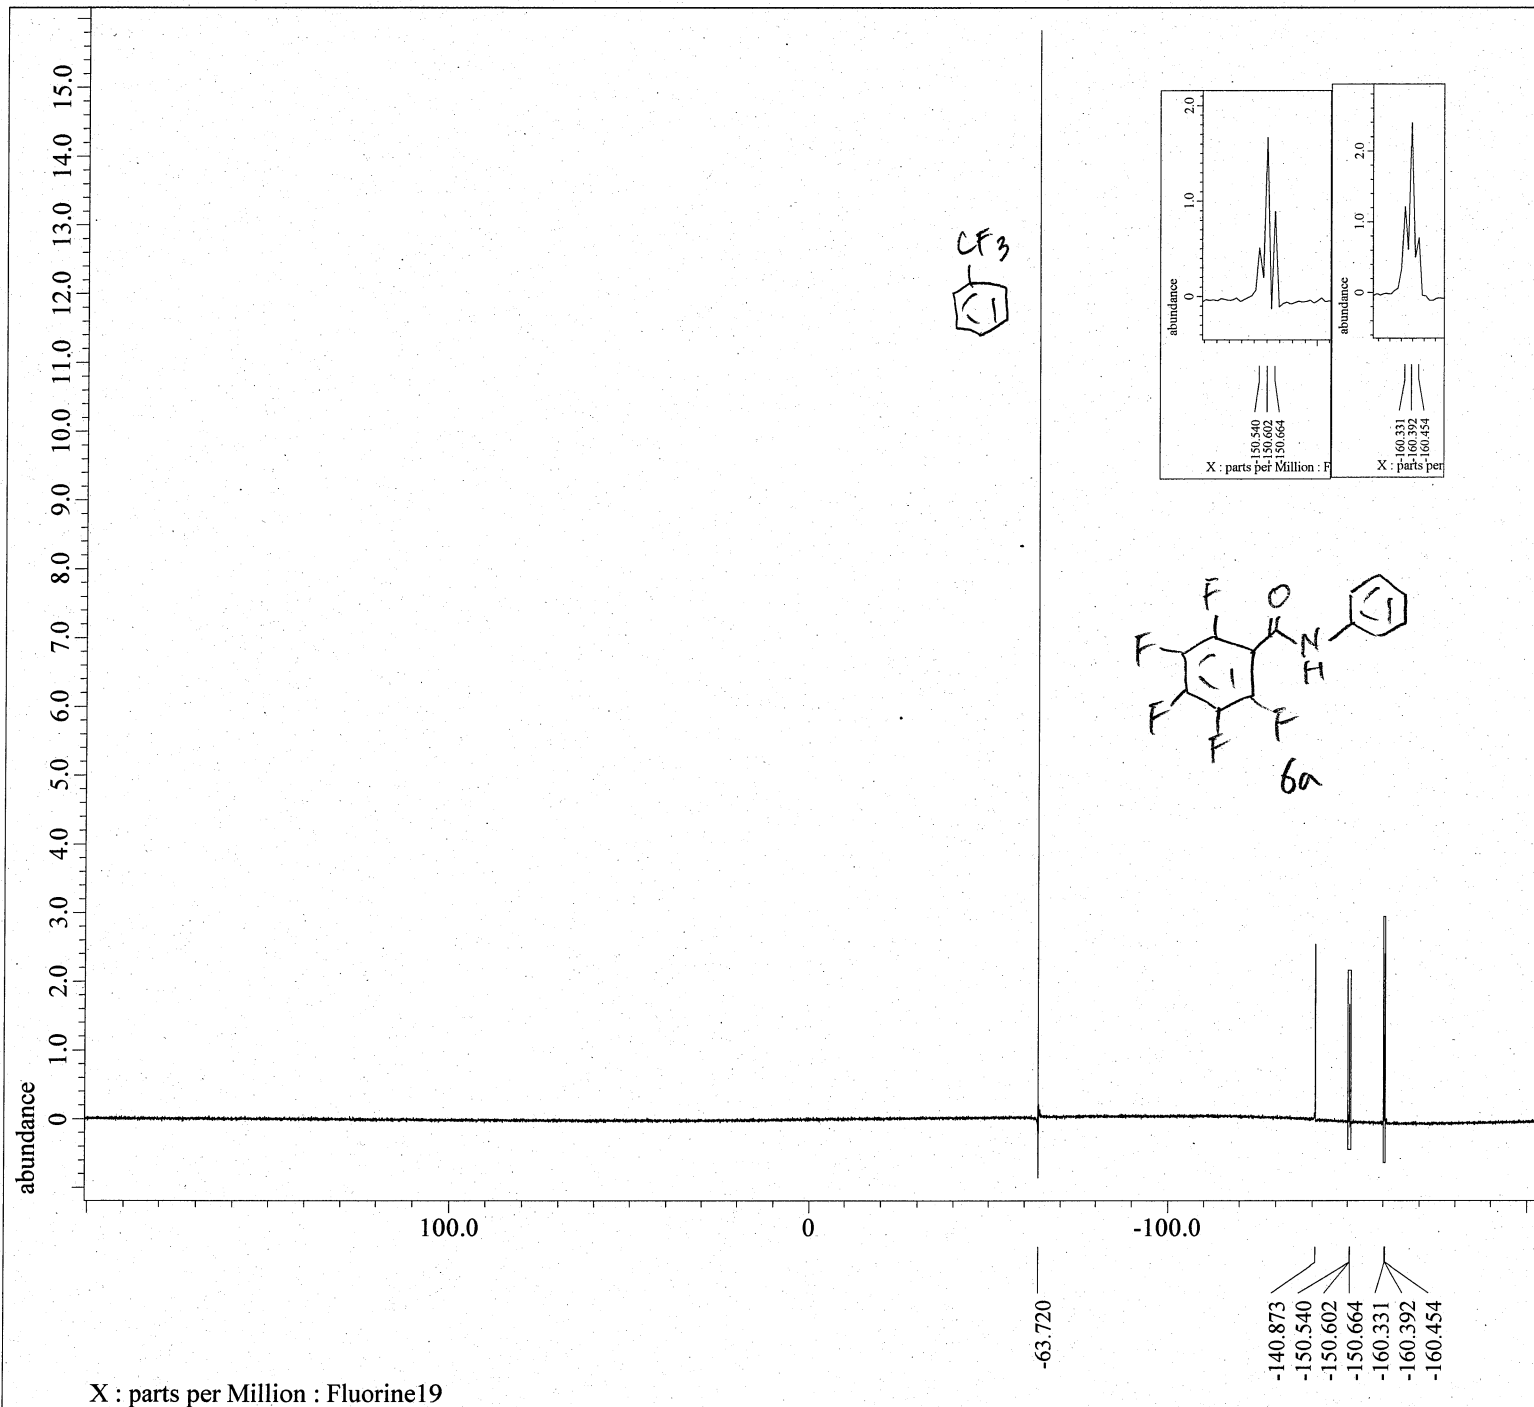

```

---- PROCESSING PARAMETERS ----
dc_balance( 0, FALSE )
sexp( 0.2[Hz], 0.0[s] )
trapezoid( 0[%], 0[%], 80[%], 100[%] )
zerofill( 1 )
fft( 1, TRUE, TRUE )
machinephase
ppm
phase( -50, 0, 50[%] )

以下に由来: TKH-1510_F_standard_Proton-1-1.jdf

```

```

Filename      = TKH-1510_F_standard_Proto
Author        = element
Experiment    = proton.jxp
Sample_Id     = TKH-1510_F_standard
Solvent       = CHLOROFORM-D
Actual_Start_Time = 7-MAR-2022 15:56:17
Revision_Time  = 11-MAR-2022 13:59:02

Comment       = single pulse
Data Format    = 1D COMPLEX
Dim_Size      = 13107
X_Domain      = Fluori
Dim_Title     = Fluorine19
Dim_Units     = [ppm]
Dimensions    = X
Site          = JNM-ECS400
Spectrometer   = DELTA2_NMR

Field Strength = 9.37221[T] (400[MHz])
X_Acq_Duration = 86.50752[ms]
X_Domain       = 19F
X_Freq         = 375.46772873[MHz]
X_Offset       = 0[ppm]
X_Points       = 16384
X_Prescans     = 1
X_Resolution   = 11.55968868[Hz]
X_Sweep        = 189.39393939[kHz]
X_Sweep_Clippped = 151.51515152[kHz]
Irr_Domain     = Fluorine19
Irr_Freq       = 375.46772873[MHz]
Irr_Offset     = 5[ppm]
Tri_Domain     = Fluorine19
Tri_Freq       = 375.46772873[MHz]
Tri_Offset     = 5[ppm]
Clipped        = FALSE
Scans          = 8
Total_Scans    = 8

Relaxation_Delay = 5[s]
Recvr_Gain       = 46
Temp_Get         = 18[dC]
X_90_Width      = 7.6[us]
X_Acq_Time       = 86.50752[ms]
X_Angle         = 45[deg]
X_Atn           = 2.5[dB]
X_Pulse         = 3.8[us]
Irr_Mode        = Off
Tri_Mode        = Off
Dante_Presat    = FALSE
Initial_Wait     = 1[s]
Repetition_Time = 5.08650752[s]

```

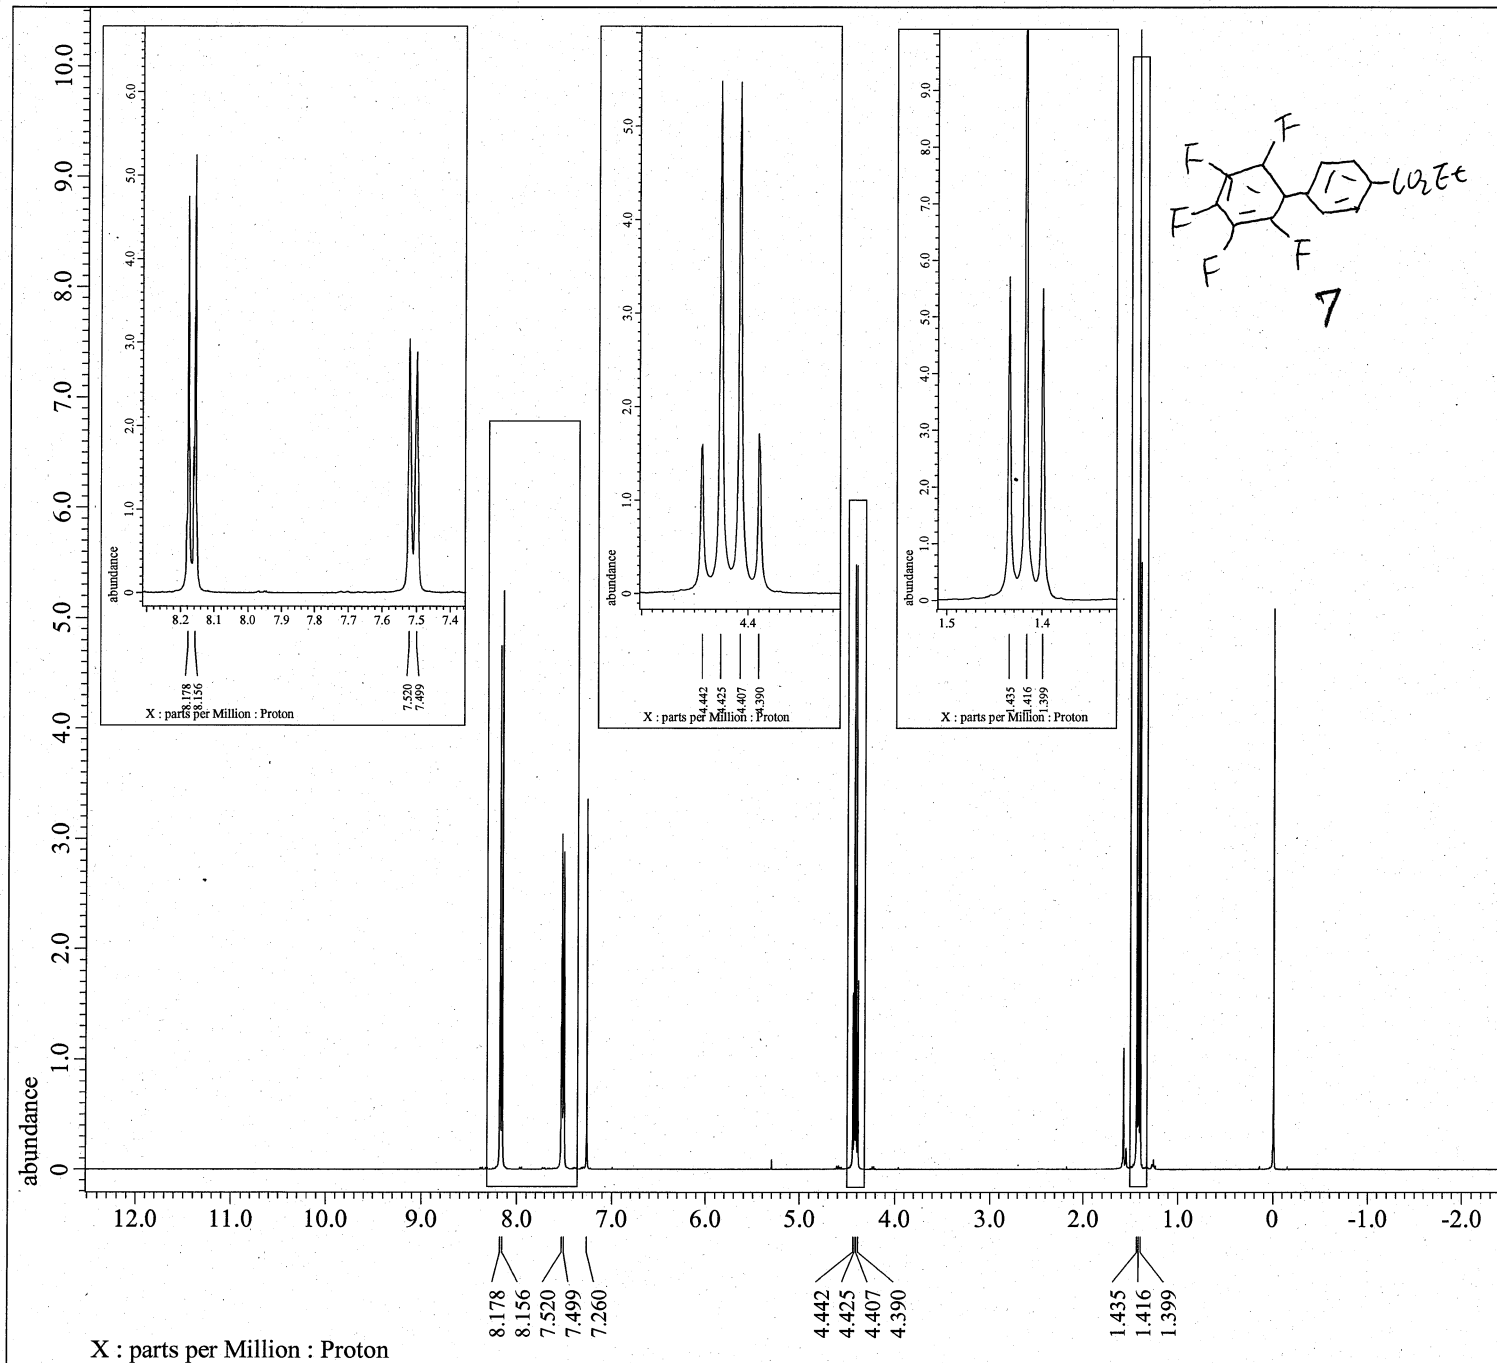

---- PROCESSING PARAMETERS ----  
 dc\_balance( 0, FALSE )  
 sexp( 0.2[Hz], 0.0[s] )  
 trapezoid( 0[%], 0[%], 80[%], 100[%] )  
 zerofill( 1, TRUE )  
 fft( 1, TRUE, TRUE )  
 machinephase  
 ppm

数据来源: 20220521gp641\_Proton-1-1.jdf

Filename = 20220521gp641\_Proton  
 Author = element  
 Experiment = proton.jxp  
 Sample Id = 20220521gp641  
 Solvent = CHLOROFORM-D  
 Actual\_Start\_Time = 21-MAY-2022 14:59:06  
 Revision\_Time = 26-MAY-2022 09:41:20

Comment = single\_pulse  
 Data\_Format = 1D COMPLEX  
 Dim\_Size = 13107  
 X\_Domain = Proton  
 Dim\_Title = Proton  
 Dim\_Units = [ppm]  
 Dimensions = X  
 Site = JNM-ECS400  
 Spectrometer = DELTA2\_NMR

Field\_Strength = 9.37221[T] (400[MHz])  
 X\_Acq\_Duration = 2.1889024[s]  
 X\_Domain = 1H  
 X\_Freq = 399.03472754[MHz]  
 X\_Offset = 5.0[ppm]  
 X\_Points = 16384  
 X\_Prescans = 1  
 X\_Resolution = 0.45684997[Hz]  
 X\_Sweep = 7.48502994[kHz]  
 X\_Sweep\_Clipped = 5.98802395[kHz]  
 Irr\_Domain = Proton  
 Irr\_Freq = 399.03472754[MHz]  
 Irr\_Offset = 5.0[ppm]  
 Tri\_Domain = Proton  
 Tri\_Freq = 399.03472754[MHz]  
 Tri\_Offset = 5.0[ppm]  
 Clipped = FALSE  
 Scans = 8  
 Total\_Scans = 8

Relaxation\_Delay = 5[s]  
 Recvr\_Gain = 42  
 Temp\_Get = 17.4[dc]  
 X\_90\_Width = 6.6[us]  
 X\_Acq\_Time = 2.1889024[s]  
 X\_Angle = 45[deg]  
 X\_Atn = 1[db]  
 X\_Pulse = 3.3[us]  
 Irr\_Mode = Off  
 Tri\_Mode = Off  
 Dante\_Presat = FALSE  
 Initial\_Wait = 1[s]  
 Repetition\_Time = 7.1889024[s]

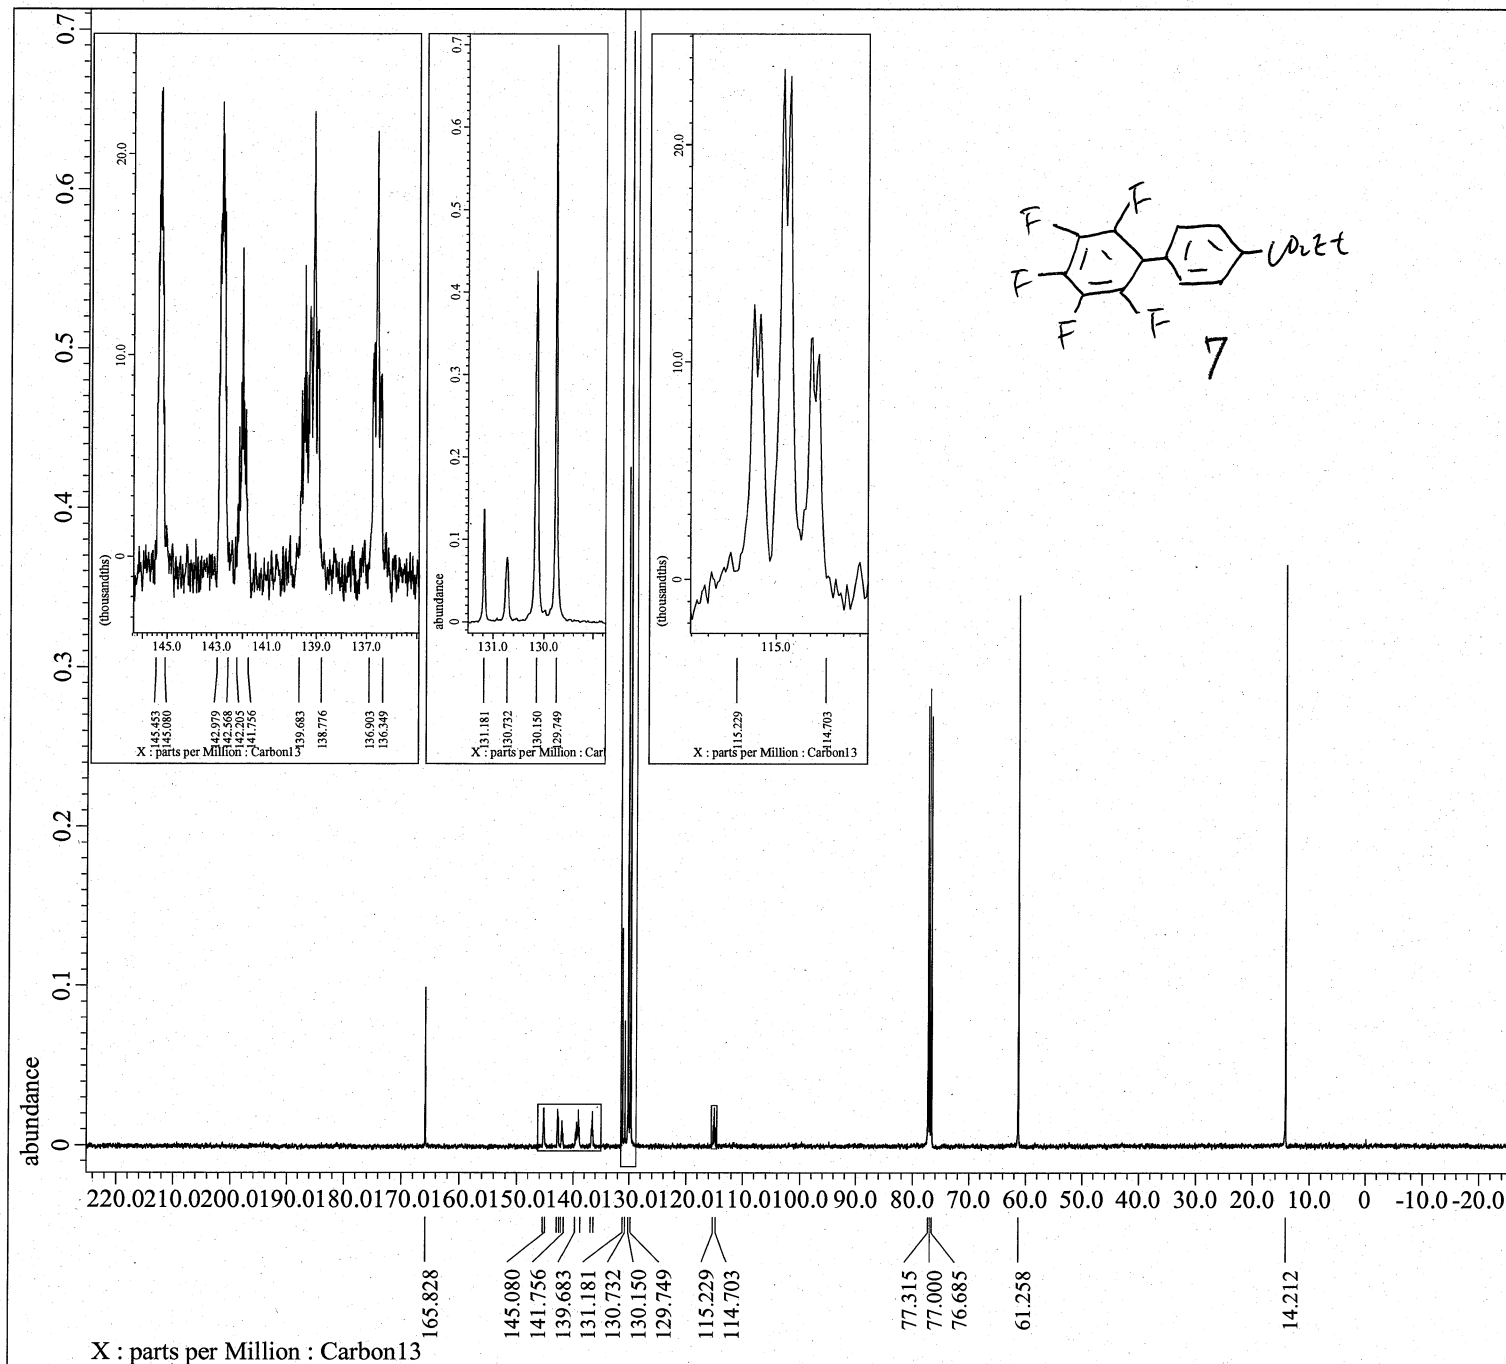

---- PROCESSING PARAMETERS ----  
 dc\_balance( 0, FALSE )  
 sexp( 2.0[Hz], 0.0[s] )  
 trapezoid( 0[%], 0[%], 80[%], 100[%] )  
 zerofill( 1, TRUE )  
 fft( 1, TRUE, TRUE )  
 machinephase  
 ppm

数据来源: 20220521gp641\_Carbon-2-1.jdf

Filename = 20220521gp641\_Carbon  
 Author = element  
 Experiment = carbon.jxp  
 Sample Id = 20220521gp641  
 Solvent = CHLOROFORM-D  
 Actual\_Start\_Time = 21-MAY-2022 16:02:57  
 Revision\_Time = 26-MAY-2022 10:08:10

Comment = single pulse decoupl  
 Data\_Format = 1D COMPLEX  
 Dim\_Size = 26214  
 X\_Domain = Carbon  
 Dim\_Title = Carbon13  
 Dim\_Units = [ppm]  
 Dimensions = X  
 Site = JNM-ECS400  
 Spectrometer = DELTA2\_NMR

Field\_Strength = 9.37221[T] (400[MHz])  
 X\_Acq\_Duration = 1.04333312[s]  
 X\_Domain = 13C  
 X\_Freq = 100.33735165[MHz]  
 X\_Offset = 100.0[ppm]  
 X\_Points = 32768  
 X\_Prescans = 4  
 X\_Resolution = 0.95846665[Hz]  
 X\_Sweep = 31.40703518[kHz]  
 X\_Sweep\_Clipped = 25.12562814[kHz]  
 Irr\_Domain = Proton  
 Irr\_Freq = 399.03472754[MHz]  
 Irr\_Offset = 5.0[ppm]  
 Clipped = FALSE  
 Scans = 1024  
 Total\_Scans = 1024

Relaxation\_Delay = 2[s]  
 Recvr\_Gain = 50  
 Temp\_Get = 17.6[dC]  
 X\_90\_Width = 10.9[us]  
 X\_Acq\_Time = 1.04333312[s]  
 X\_Angle = 30[deg]  
 X\_Atn = 5.4[dB]  
 X\_Pulse = 3.63333333[us]  
 Irr\_Atn\_Dec = 25.823[dB]  
 Irr\_Atn\_Noise = 25.823[dB]  
 Irr\_Noise = WALTZ  
 Irr\_Pwidth = 0.115[ms]  
 Decoupling = TRUE  
 Initial\_Wait = 1[s]  
 Noe = TRUE  
 Noe\_Time = 2[s]  
 Repetition\_Time = 3.04333312[s]

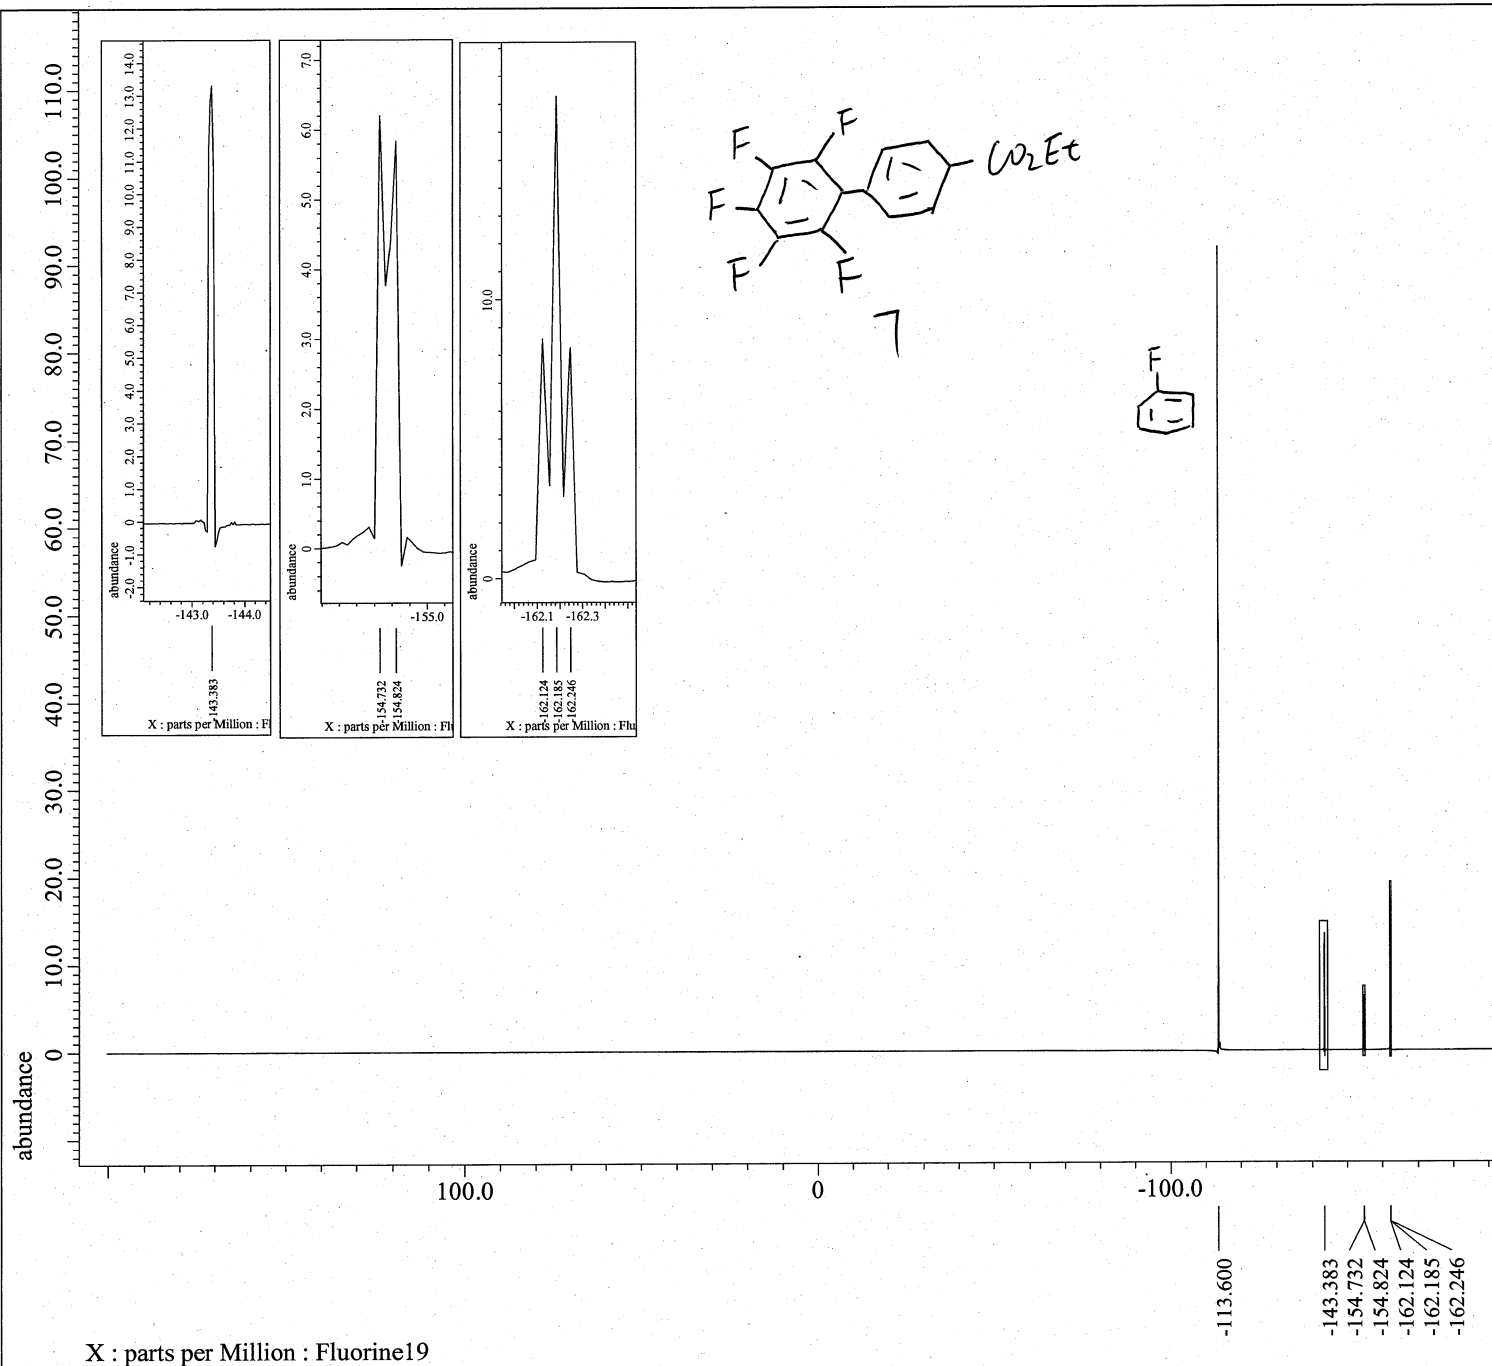

```

---- PROCESSING PARAMETERS ----
dc_balance( 0, FALSE )
sexp( 0.2[Hz], 0.0[s] )
trapezoid( 0[%], 0[%], 80[%], 100[%] )
zerofill( 1, TRUE )
fft( 1, TRUE, TRUE )
machinephase
ppm

```

数据来源: 20220523gp641\_single\_pulse-1-1

```

Filename      = 20220523gp641_single
Author       = element
Experiment    = single_pulse.jxp
Sample Id    = 20220523gp641
Solvent      = CHLOROFORM-D
Actual_Start_Time = 23-MAY-2022 13:53:44
Revision_Time  = 26-MAY-2022 12:42:19

```

```

Comment      = single_pulse
Data_Format   = 1D COMPLEX
Dim_Size     = 13107
X_Domain     = Fluori
Dim_Title    = Fluorine19
Dim_Units    = [ppm]
Dimensions   = X
Spectrometer  = DELTA2_NMR

```

```

Field_Strength = 9.4073814[T] (400[MH
X_Acq_Duration = 86.50752[ms]
X_Domain       = 19F
X_Freq         = 376.87675879[MHz]
X_Offset       = 0[ppm]
X_Points       = 16384
X_Prescans     = 1
X_Resolution   = 11.55968868[Hz]
X_Sweep        = 189.39393939[kHz]
X_Sweep_Clippped = 151.51515152[kHz]
Irr_Domain     = Fluorine19
Irr_Freq       = 376.87675879[MHz]
Irr_Offset     = 5[ppm]
Tri_Domain     = Fluorine19
Tri_Freq       = 376.87675879[MHz]
Tri_Offset     = 5[ppm]
Clipped        = FALSE
Scans          = 8
Total_Scans    = 8

```

```

Relaxation_Delay = 5[s]
Recvr_Gain       = 38
Temp_Get         = 18.9[dC]
X_90_Width      = 6.8[us]
X_Acq_Time       = 86.50752[ms]
X_Angle         = 45[deg]
X_Atn           = 3[dB]
X_Pulse          = 3.4[us]
Irr_Mode         = Off
Tri_Mode         = Off
Dante_Presat     = FALSE
Initial_Wait     = 1[s]
Repetition_Time  = 5.08650752[s]

```

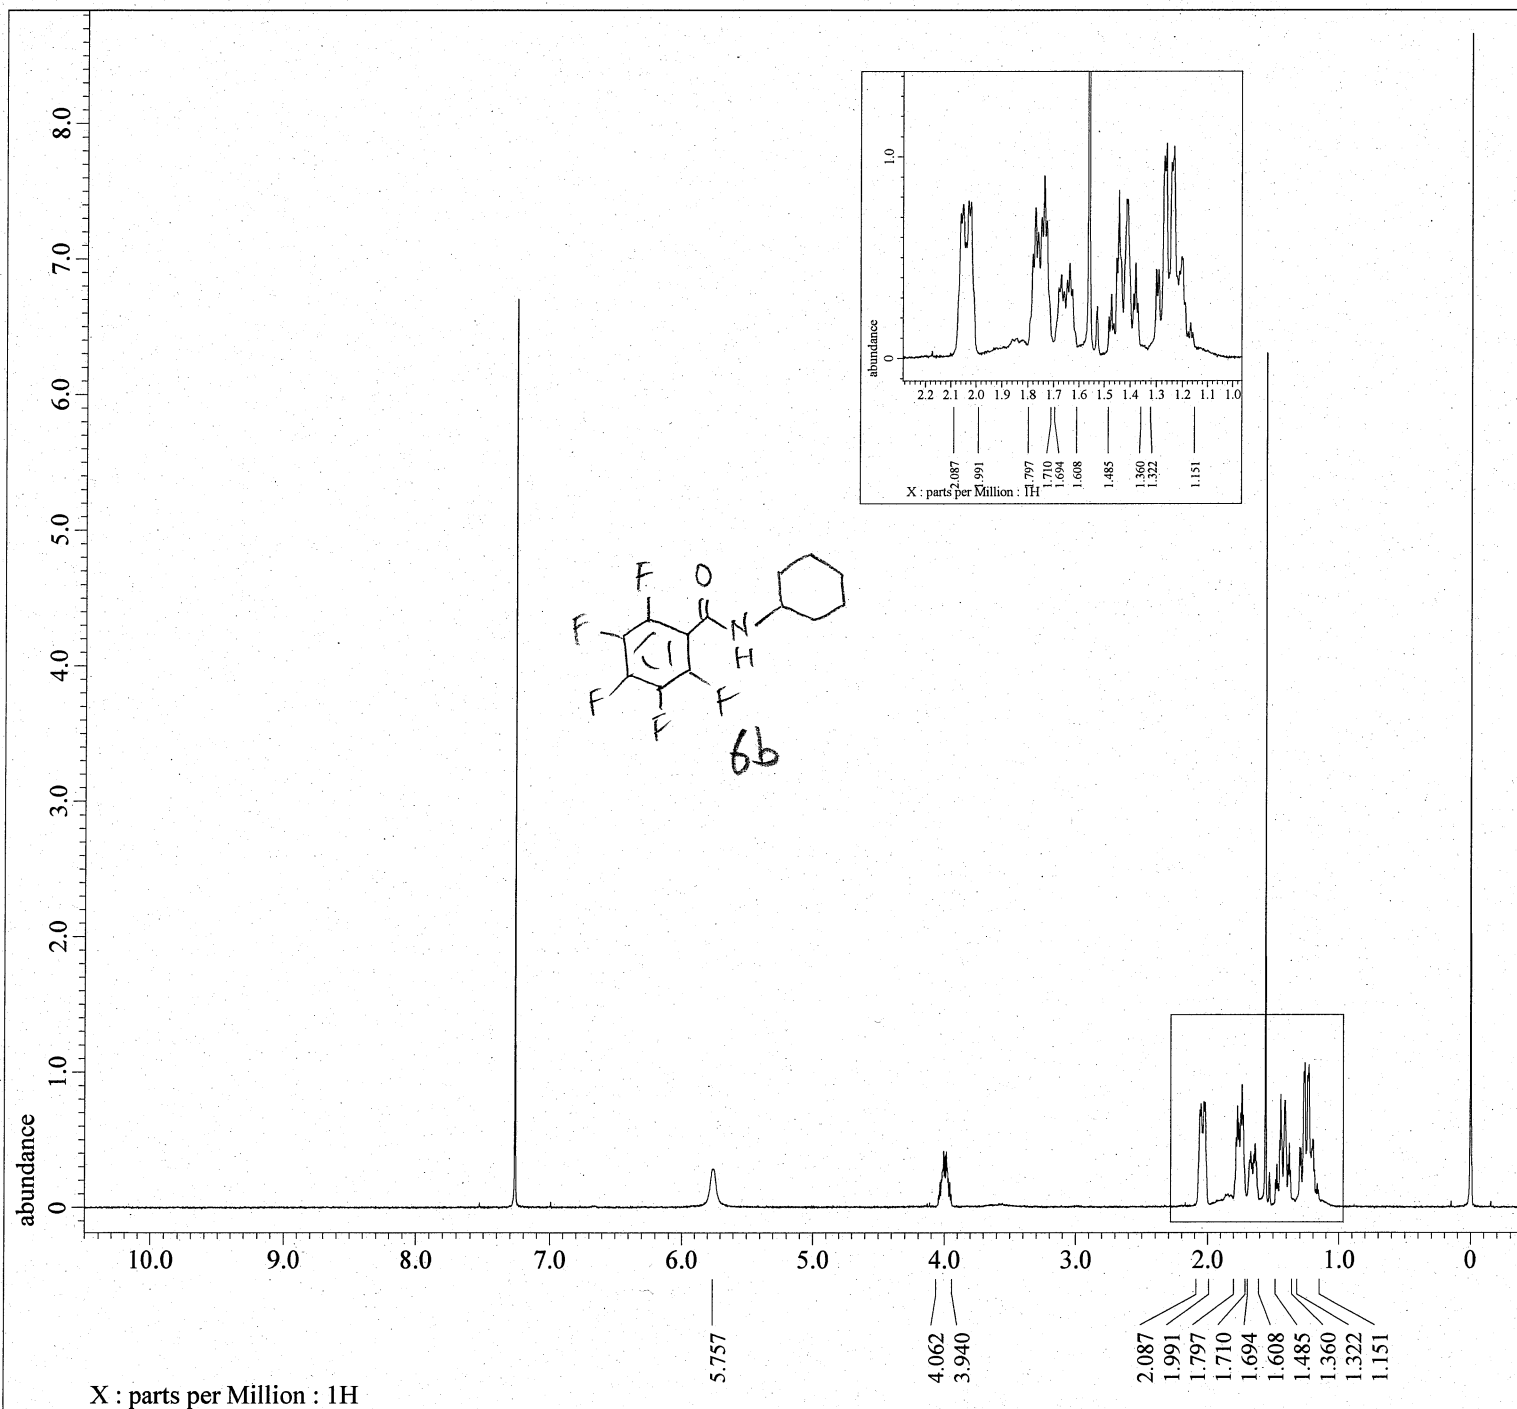

----- PROCESSING PARAMETERS -----  
 dc\_balance( 0, FALSE )  
 sepx( 0.2[Hz], 0.0[s] )  
 trapezoid3( 0[%], 80[%], 100[%] )  
 zerofill( 1 )  
 fft( 1, TRUE, TRUE )  
 machinephase  
 ppm

以下に由来: TKH-1509column-1.jdf

Filename = TKH-1509column-2.jdf  
 Author = element  
 Experiment = single\_pulse.ex2  
 Sample\_Id = 1  
 Solvent = CHLOROFORM-D  
 Actual\_Start\_Time = 26-NOV-2021 01:13:32  
 Revision\_Time = 11-MAR-2022 12:27:54

Comment = single\_pulse  
 Data\_Format = 1D COMPLEX  
 Dim\_Size = 13107  
 X\_Domain = 1H  
 Dim\_Title = 1H  
 Dim\_Units = [ppm]  
 Dimensions = X  
 Site = ECS 400  
 Spectrometer = JNM-ECS400

Field\_Strength = 9.20197068[T] (390[MHz])  
 X\_Acq\_Duration = 2.228224[s]  
 X\_Domain = 1H  
 X\_Freq = 391.78655441[MHz]  
 X\_Offset = 5[ppm]  
 X\_Points = 16384  
 X\_Prescans = 1  
 X\_Resolution = 0.44878791[Hz]  
 X\_Sweep = 7.35294118[kHz]  
 Irr\_Domain = 1H  
 Irr\_Freq = 391.78655441[MHz]  
 Irr\_Offset = 5[ppm]  
 Tri\_Domain = 1H  
 Tri\_Freq = 391.78655441[MHz]  
 Tri\_Offset = 5[ppm]  
 Clipped = FALSE  
 Scans = 8  
 Total\_Scans = 8

Relaxation\_Delay = 5[s]  
 Recvr\_Gain = 56  
 Temp\_Get = 20.7[dC]  
 X\_90\_Width = 10.8[us]  
 X\_Acq\_Time = 2.228224[s]  
 X\_Angle = 45[deg]  
 X\_Atn = 1.9[dB]  
 X\_Pulse = 5.4[us]  
 Irr\_Mode = Off  
 Tri\_Mode = Off  
 Dante\_Presat = FALSE  
 Initial\_Wait = 1[s]  
 Repetition\_Time = 7.228224[s]

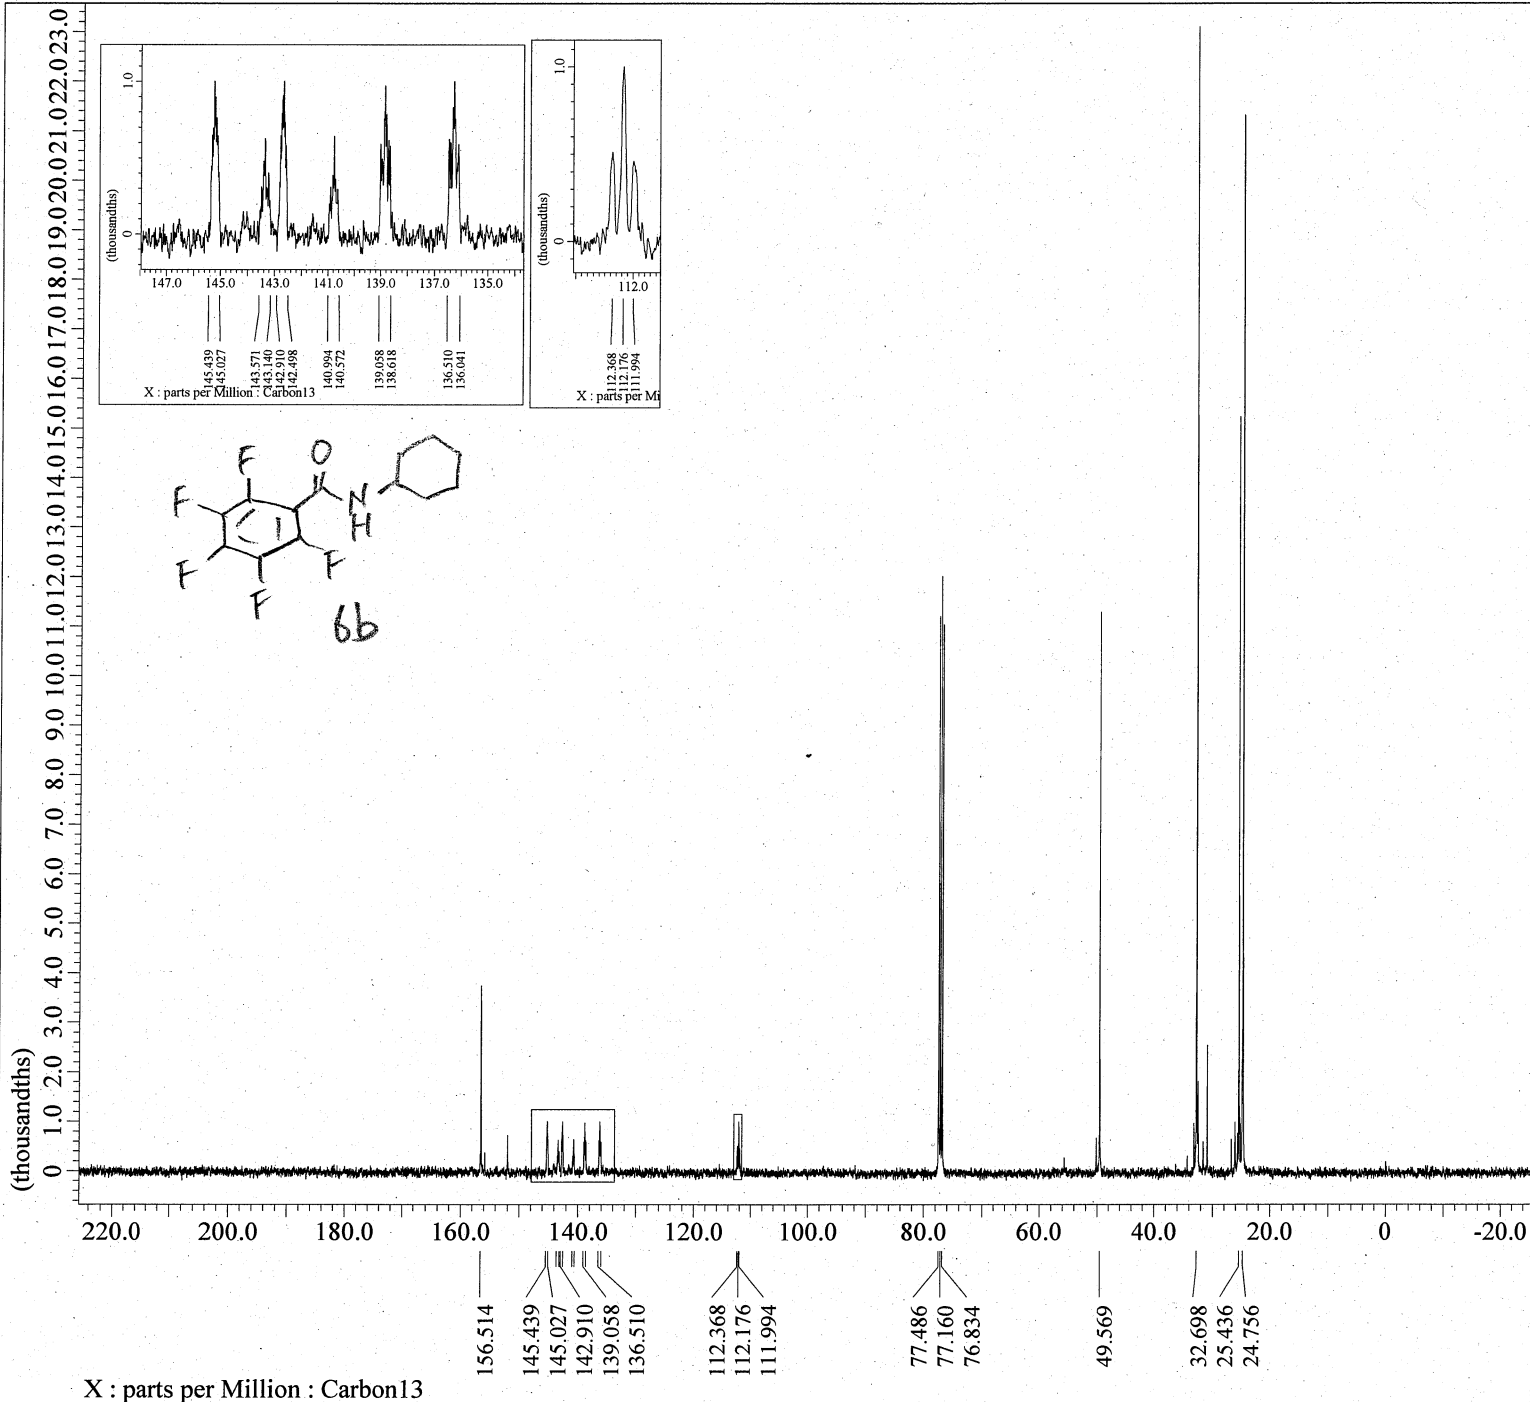

----- PROCESSING PARAMETERS -----  
 sexp( 2.0[Hz], 0.0[s] )  
 trapezoid( 0[%], 0[%], 80[%], 100[%] )  
 zerofill( 1 )  
 fft( 1, TRUE, TRUE )  
 machinephase  
 ppm

以下に由来: TKH-1509\_carbon-1-1.jdf

Filename = TKH-1509\_carbon-1-  
 Author = element  
 Experiment = carbon.jxp  
 Sample\_Id = TKH-1509  
 Solvent = CHLOROFORM-D  
 Actual\_Start\_Time = 8-MAR-2022 16:18:  
 Revision\_Time = 10-MAR-2022 19:39:

Comment = single pulse decou  
 Data\_Format = 1D COMPLEX  
 Dim\_Size = 26214  
 X\_Domain = Carbon13  
 Dim\_Title = Carbon13  
 Dim\_Units = [ppm]  
 Dimensions = X  
 Spectrometer = DELTA2\_NMR

Field\_Strength = 9.2982153[T] (400[  
 X\_Acq\_Duration = 1.048576[s]  
 X\_Domain = Carbon13  
 X\_Freq = 99.54517646[MHz]  
 X\_Offset = 100[ppm]  
 X\_Points = 32768  
 X\_Prescans = 4  
 X\_Resolution = 0.95367432[Hz]  
 X\_Sweep = 31.25[kHz]  
 X\_Sweep\_Clipped = 25[kHz]  
 Irr\_Domain = Proton  
 Irr\_Freq = 395.88430144[MHz]  
 Irr\_Offset = 5[ppm]  
 Blanking = 5[us]  
 Clipped = TRUE  
 Scans = 400  
 Total\_Scans = 400

Relaxation\_Delay = 2[s]  
 Recvr\_Gain = 50  
 Temp\_Get = 17.8[dC]  
 X\_90\_Width = 9.65[us]  
 X\_Acq\_Time = 1.048576[s]  
 X\_Angle = 30[deg]  
 X\_Atn = 8[dB]  
 X\_Pulse = 3.21666667[us]  
 Irr\_Atn\_Dec = 25.059[dB]  
 Irr\_Atn\_Dec\_Calc = 25.059[dB]  
 Irr\_Atn\_Dec\_Default\_Calc = 25.059[dB]  
 Irr\_Atn\_No = 25.059[dB]  
 Irr\_Dec\_Bandwidth\_Hz = 4.7826087[kHz]  
 Irr\_Dec\_Bandwidth\_Ppm = 12.08082432[ppm]  
 Irr\_Dec\_Freq = 395.88430144[MHz]  
 Irr\_Dec\_Merit\_Factor = 2.2  
 Irr\_Decoupling = TRUE  
 Irr\_No = TRUE  
 Irr\_Noise = WALTZ  
 Irr\_Offset\_Default = 5[ppm]

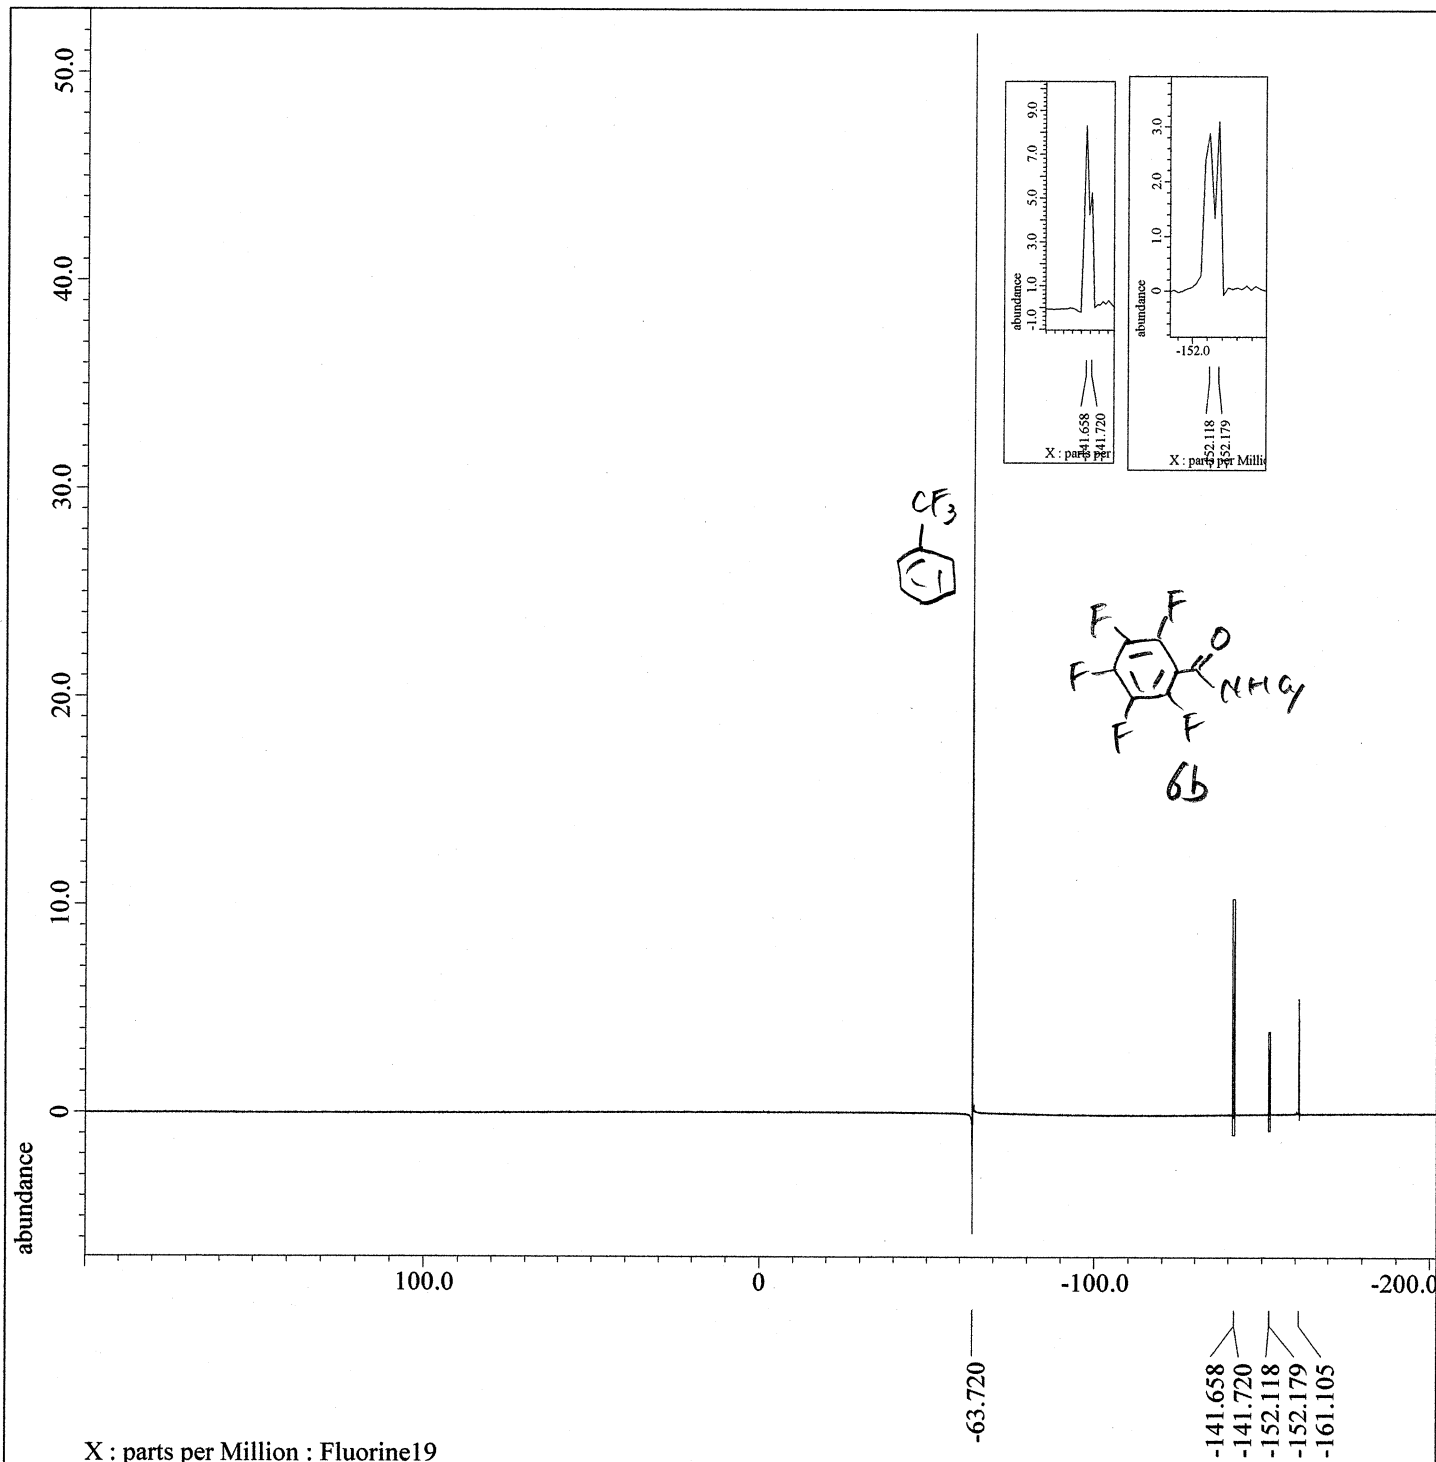

----- PROCESSING PARAMETERS -----

dc\_balance( 0, FALSE )

sexf( 0.2[Hz], 0.0[s] )

trapezoid( 0[%], 0[%], 80[%], 100[%] )

zerofill( 1 )

fft( 1, TRUE, TRUE )

machinephase

ppm

phase( -50, 0, 50[%] )

以下に由来: TKH-1509\_F\_standard\_single\_pulse

Filename = TKH-1509\_F\_standard\_sing

Author = element

Experiment = single\_pulse.jxp

Sample Id = TKH-1509 F standard

Solvent = CHLOROFORM-D

Creation Time = 5-MAR-2022 19:35:29

Revision Time = 5-MAR-2022 20:13:33

Current Time = 5-MAR-2022 20:14:02

Comment = single\_pulse

Data Format = 1D COMPLEX

Dim\_Size = 13107

Dim Title = Fluorine19

Dim Units = [ppm]

Dimensions = X

Spectrometer = DELTA2\_NMR

Field Strength = 9.4073814[T] (400[MHz])

X Acq Duration = 86.50752[ms]

X Domain = 19F

X Freq = 376.87675879[MHz]

X Offset = 0[ppm]

X Points = 16384

X Prescans = 1

X Resolution = 11.55968868[Hz]

X Sweep = 189.39393939[kHz]

X Sweep Clipped = 151.51515152[kHz]

Irr Domain = Fluorine19

Irr\_Freq = 376.87675879[MHz]

Irr\_Offset = 5[ppm]

Tri Domain = Fluorine19

Tri\_Freq = 376.87675879[MHz]

Tri\_Offset = 5[ppm]

Clipped = FALSE

Scans = 8

Total\_Scans = 8

Relaxation\_Delay = 5[s]

Recvr Gain = 46

Temp\_Get = 18.6[dC]

X 90 Width = 6.8[us]

X Acq Time = 86.50752[ms]

X Angle = 45[deg]

X Atn = 3[dB]

X Pulse = 3.4[us]

Irr\_Mode = Off

Tri\_Mode = Off

Dante Presat = FALSE

Initial Wait = 1[s]

Repetition Time = 5.08650752[s]

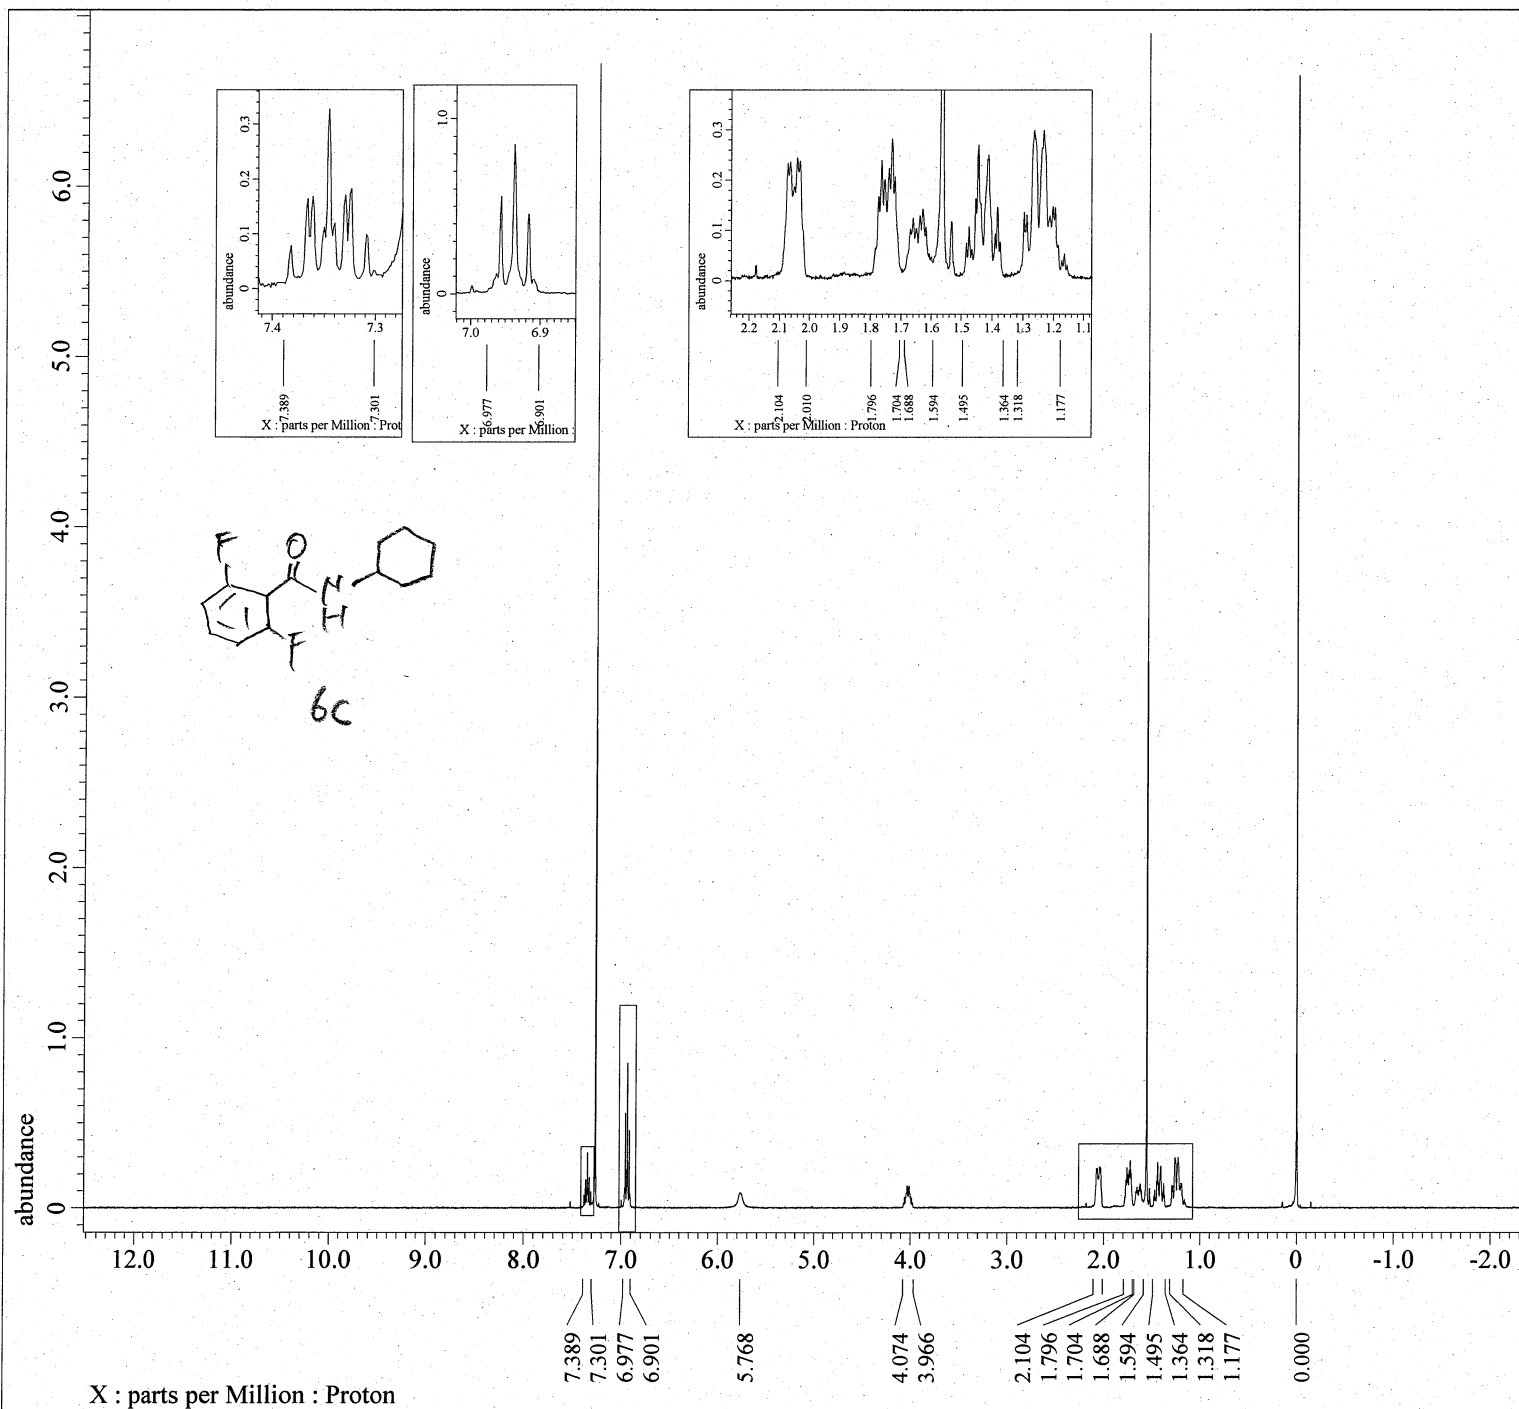

```

---- PROCESSING PARAMETERS ----
dc_balance( 0, FALSE )
sexp( 0.2[Hz], 0.0[s] )
trapezoid( 0[%], 0[%], 80[%], 100[%] )
zerofill( 1 )
fft( 1, TRUE, TRUE )
machinephase
ppm

以下に由来:: TKH-1511_H_Proton-1-1.jdf

Filename      = TKH-1511_H_Proton-1-2.jdf
Author       = element
Experiment   = proton.jxp
Sample_Id    = TKH-1511 H
Solvent      = CHLOROFORM-D
Actual_Start_Time = 5-MAR-2022 20:59:13
Revision_Time   = 11-MAR-2022 12:32:38

Comment      = single pulse
Data Format   = 1D COMPLEX
Dim Size     = 13107
X Domain     = Proton
Dim_Title    = Proton
Dim_Units    = [ppm]
Dimensions   = X
Site         = JNM-ECS400
Spectrometer = DELTA2_NMR

Field Strength = 9.37221[T] (400[MHz])
X Acq Duration = 2.1889024[s]
X Domain      = 1H
X Freq       = 399.03472754[MHz]
X Offset     = 5.0[ppm]
X Points     = 16384
X Prescans   = 1
X Resolution = 0.45684997[Hz]
X Sweep      = 7.48502994[kHz]
X Sweep_Clippped = 5.98802395[kHz]
Irr_Domain   = Proton
Irr Freq     = 399.03472754[MHz]
Irr_Offset   = 5.0[ppm]
Tri_Domain   = Proton
Tri Freq     = 399.03472754[MHz]
Tri_Offset   = 5.0[ppm]
Clipped      = FALSE
Scans        = 8
Total_Scans  = 8

Relaxation_Delay = 5[s]
Recvr_Gain       = 52
Temp_Get         = 17.8[dC]
X_90_Width      = 6.6[us]
X Acq_Time      = 2.1889024[s]
X Angle         = 45[deg]
X Atn           = 1[dB]
X Pulse         = 3.3[us]
Irr_Mode        = Off
Tri_Mode        = Off
Dante_Presat    = FALSE
Initial_Wait    = 1[s]
Repetition_Time = 7.1889024[s]
  
```



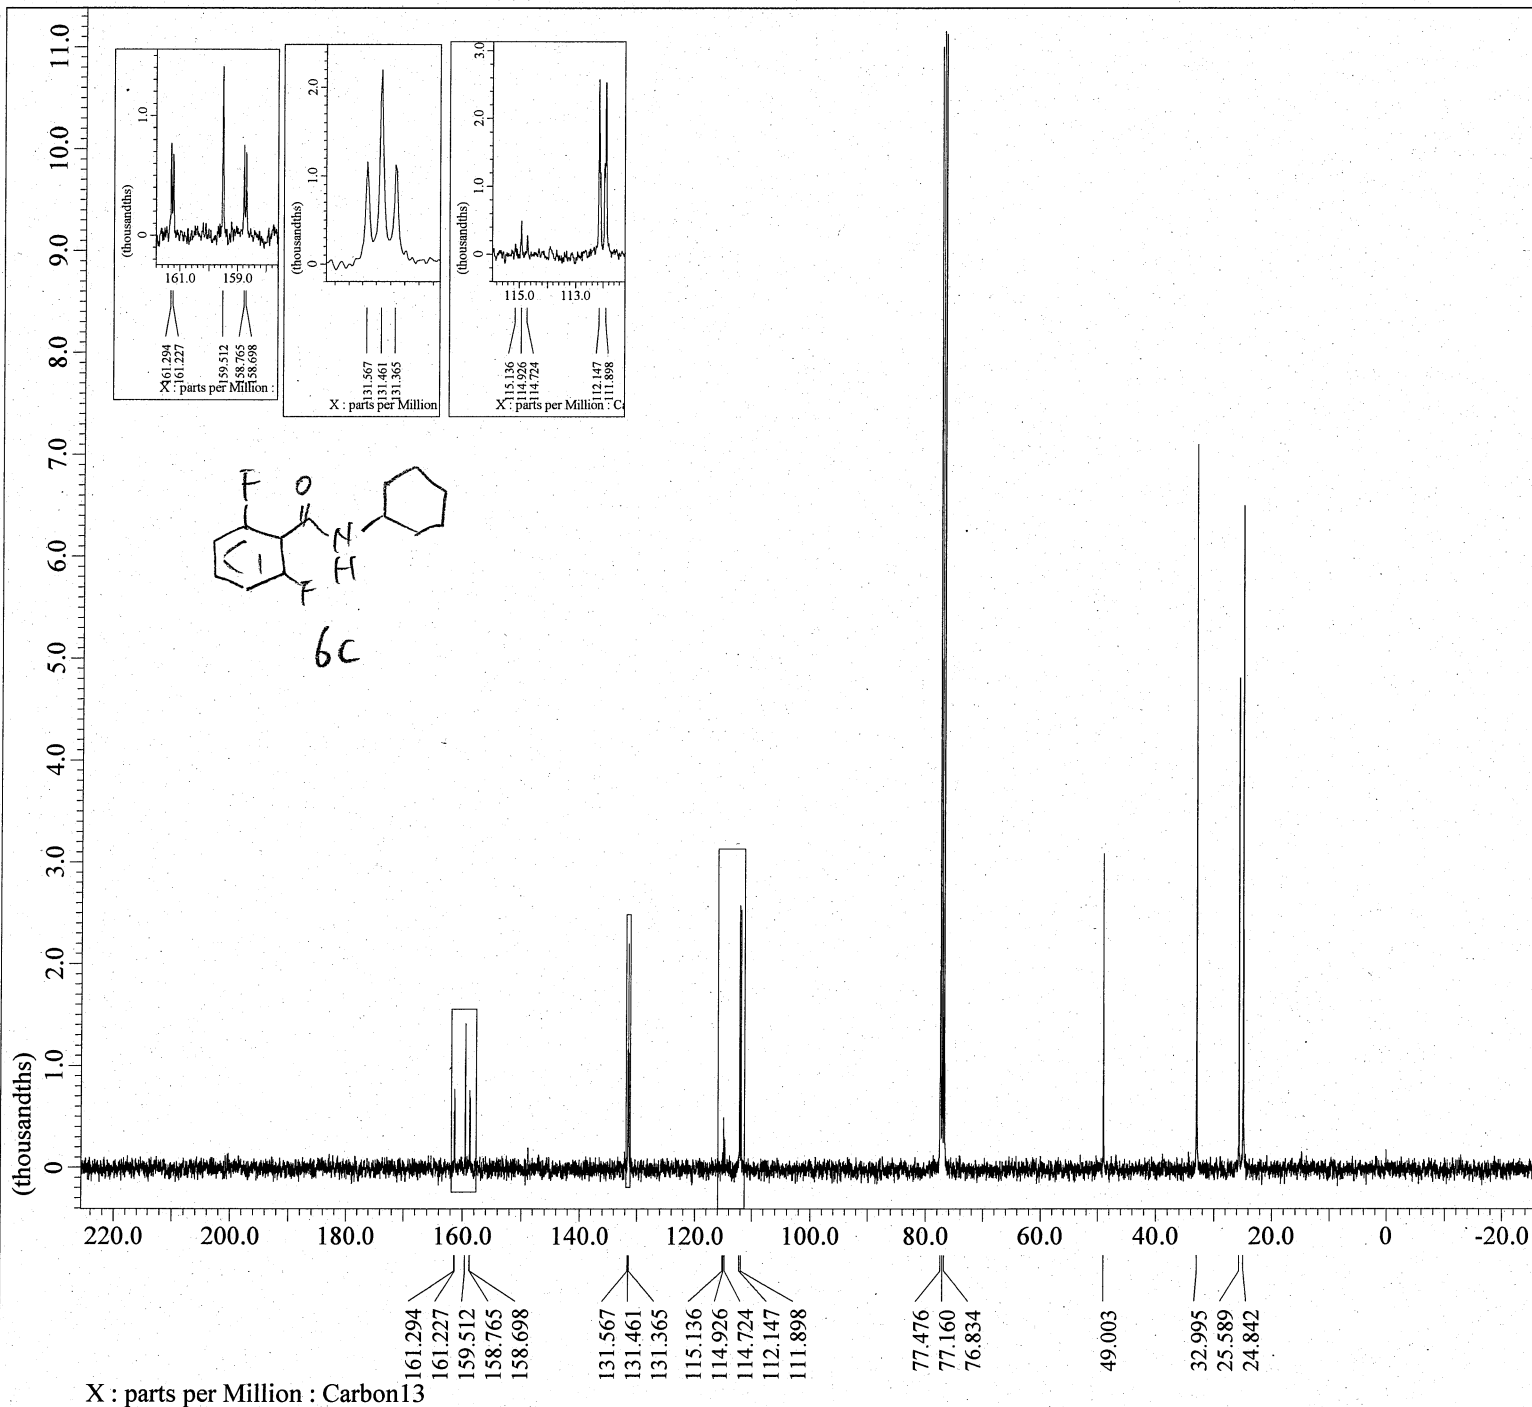

----- PROCESSING PARAMETERS -----

```

sexp( 2.0[Hz], 0.0[s] )
trapezoid( 0[%], 0[%], 80[%], 100[%] )
zerofill( 1 )
fft( 1, TRUE, TRUE )
machinephase
ppm

```

以下に由来: TKH-1511\_carbon-1-1.jdf

|                          |                      |
|--------------------------|----------------------|
| Filename                 | = TKH-1511_carbon-1- |
| Author                   | = element            |
| Experiment               | = carbon.jxp         |
| Sample Id                | = TKH-1511           |
| Solvent                  | = CHLOROFORM-D       |
| Actual_Start_Time        | = 9-MAR-2022 13:57:  |
| Revision_Time            | = 10-MAR-2022 19:45: |
| Comment                  | = single pulse decou |
| Data Format              | = 1D COMPLEX         |
| Dim Size                 | = 26214              |
| X Domain                 | = Carbon13           |
| Dim Title                | = Carbon13           |
| Dim Units                | = [ppm]              |
| Dimensions               | = X                  |
| Spectrometer             | = DELTA2_NMR         |
| Field_Strength           | = 9.2982153[T] (400[ |
| X Acq_Duration           | = 1.048576[s]        |
| X Domain                 | = Carbon13           |
| X_Freq                   | = 99.54517646[MHz]   |
| X_Offset                 | = 100[ppm]           |
| X Points                 | = 32768              |
| X Prescans               | = 4                  |
| X Resolution             | = 0.95367432[Hz]     |
| X Sweep                  | = 31.25[kHz]         |
| X Sweep_Clippped         | = 25[kHz]            |
| Irr_Domain               | = Proton             |
| Irr_Freq                 | = 395.88430144[MHz]  |
| Irr_Offset               | = 5[ppm]             |
| Blanking                 | = 5[us]              |
| Clipped                  | = TRUE               |
| Scans                    | = 400                |
| Total_Scans              | = 400                |
| Relaxation_Delay         | = 2[s]               |
| Recvr_Gain               | = 50                 |
| Temp_Get                 | = 18[dC]             |
| X_90_Width               | = 9.65[us]           |
| X_Acq_Time               | = 1.048576[s]        |
| X_Angle                  | = 30[deg]            |
| X_Atn                    | = 8[dB]              |
| X_Pulse                  | = 3.21666667[us]     |
| Irr_Atn_Dec              | = 25.059[dB]         |
| Irr_Atn_Dec_Calc         | = 25.059[dB]         |
| Irr_Atn_Dec_Default_Calc | = 25.059[dB]         |
| Irr_Atn_No               | = 25.059[dB]         |
| Irr_Dec_Bandwidth_Hz     | = 4.7826087[kHz]     |
| Irr_Dec_Bandwidth_Ppm    | = 12.08082432[ppm]   |
| Irr_Dec_Freq             | = 395.88430144[MHz]  |
| Irr_Dec_Merit_Factor     | = 2.2                |
| Irr_Decoupling           | = TRUE               |
| Irr_No                   | = TRUE               |
| Irr_Noise                | = WALTZ              |
| Irr_Offset_Default       | = 5[ppm]             |

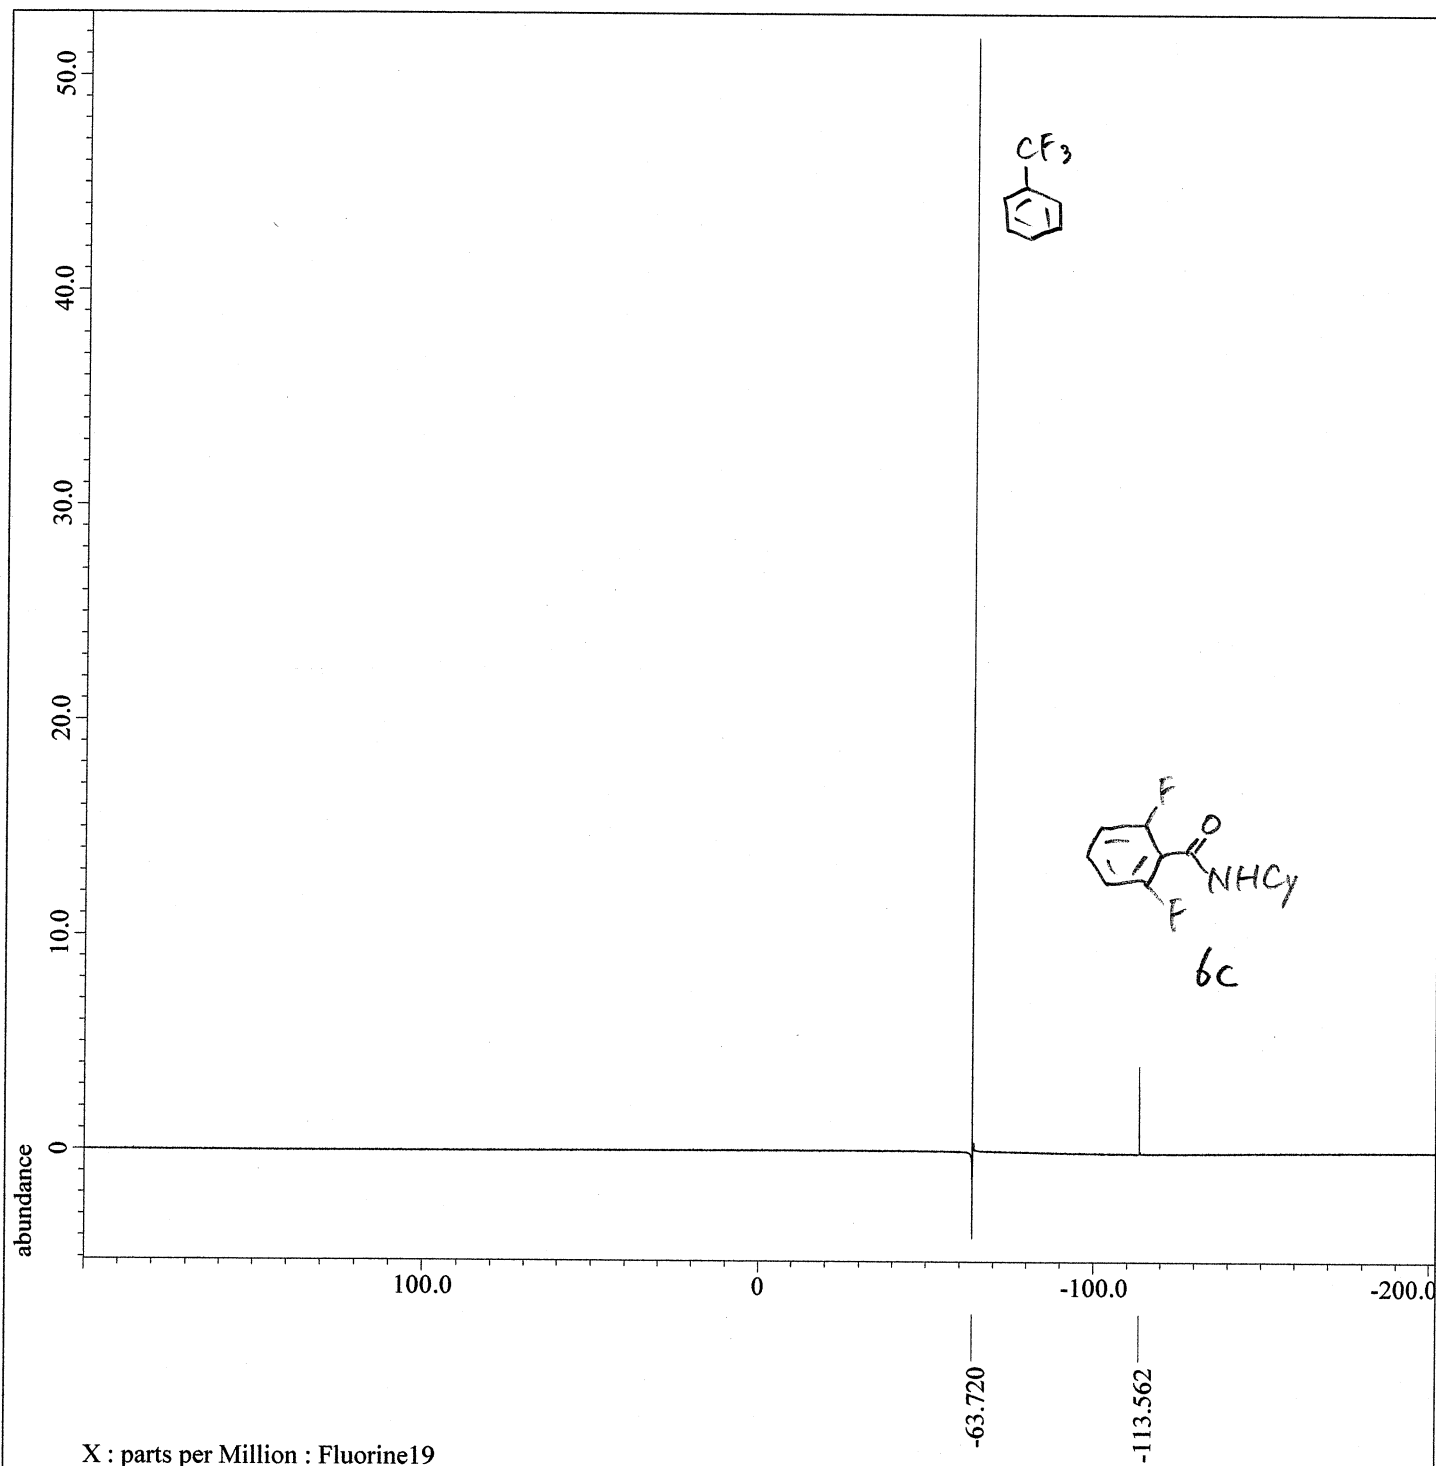

---- PROCESSING PARAMETERS ----  
 dc\_balance( 0, FALSE )  
 sexp( 0.2[Hz], 0.0[s] )  
 trapezoid( 0[%], 0[%], 80[%], 100[%] )  
 zerofill( 1 )  
 fft( 1, TRUE, TRUE )  
 machinephase  
 ppm  
 phase( -45, 0, 50[%] )  
 以下に由来: TKH-1511\_F\_standard\_single\_pulse

Filename = TKH-1511\_F\_standard\_sing  
 Author = element  
 Experiment = single\_pulse.jxp  
 Sample\_Id = TKH-1511\_F\_standard  
 Solvent = CHLOROFORM-D  
 Creation\_Time = 5-MAR-2022 21:21:13  
 Revision\_Time = 5-MAR-2022 20:54:20  
 Current\_Time = 5-MAR-2022 20:54:24

Comment = single\_pulse  
 Data\_Format = 1D\_COMPLEX  
 Dim\_Size = 13107  
 Dim\_Title = Fluorine19  
 Dim\_Units = [ppm]  
 Dimensions = X  
 Spectrometer = DELTA2\_NMR

Field\_Strength = 9.4073814[T] (400[MHz])  
 X\_Acq\_Duration = 86.50752[ms]  
 X\_Domain = 19F  
 X\_Freq = 376.87675879[MHz]  
 X\_Offset = 0[ppm]  
 X\_Points = 16384  
 X\_Prescans = 1  
 X\_Resolution = 11.55968868[Hz]  
 X\_Sweep = 189.39393939[kHz]  
 X\_Sweep\_Clipped = 151.51515152[kHz]  
 Irr\_Domain = Fluorine19  
 Irr\_Freq = 376.87675879[MHz]  
 Irr\_Offset = 5[ppm]  
 Tri\_Domain = Fluorine19  
 Tri\_Freq = 376.87675879[MHz]  
 Tri\_Offset = 5[ppm]  
 Clipped = FALSE  
 Scans = 8  
 Total\_Scans = 8

Relaxation\_Delay = 5[s]  
 Recvr\_Gain = 46  
 Temp\_Get = 19.3[dC]  
 X\_90\_Width = 6.8[us]  
 X\_Acq\_Time = 86.50752[ms]  
 X\_Angle = 45[deg]  
 X\_Atn = 3[dB]  
 X\_Pulse = 3.4[us]  
 Irr\_Mode = Off  
 Tri\_Mode = Off  
 Dante\_Presat = FALSE  
 Initial\_Wait = 1[s]  
 Repetition\_Time = 5.08650752[s]

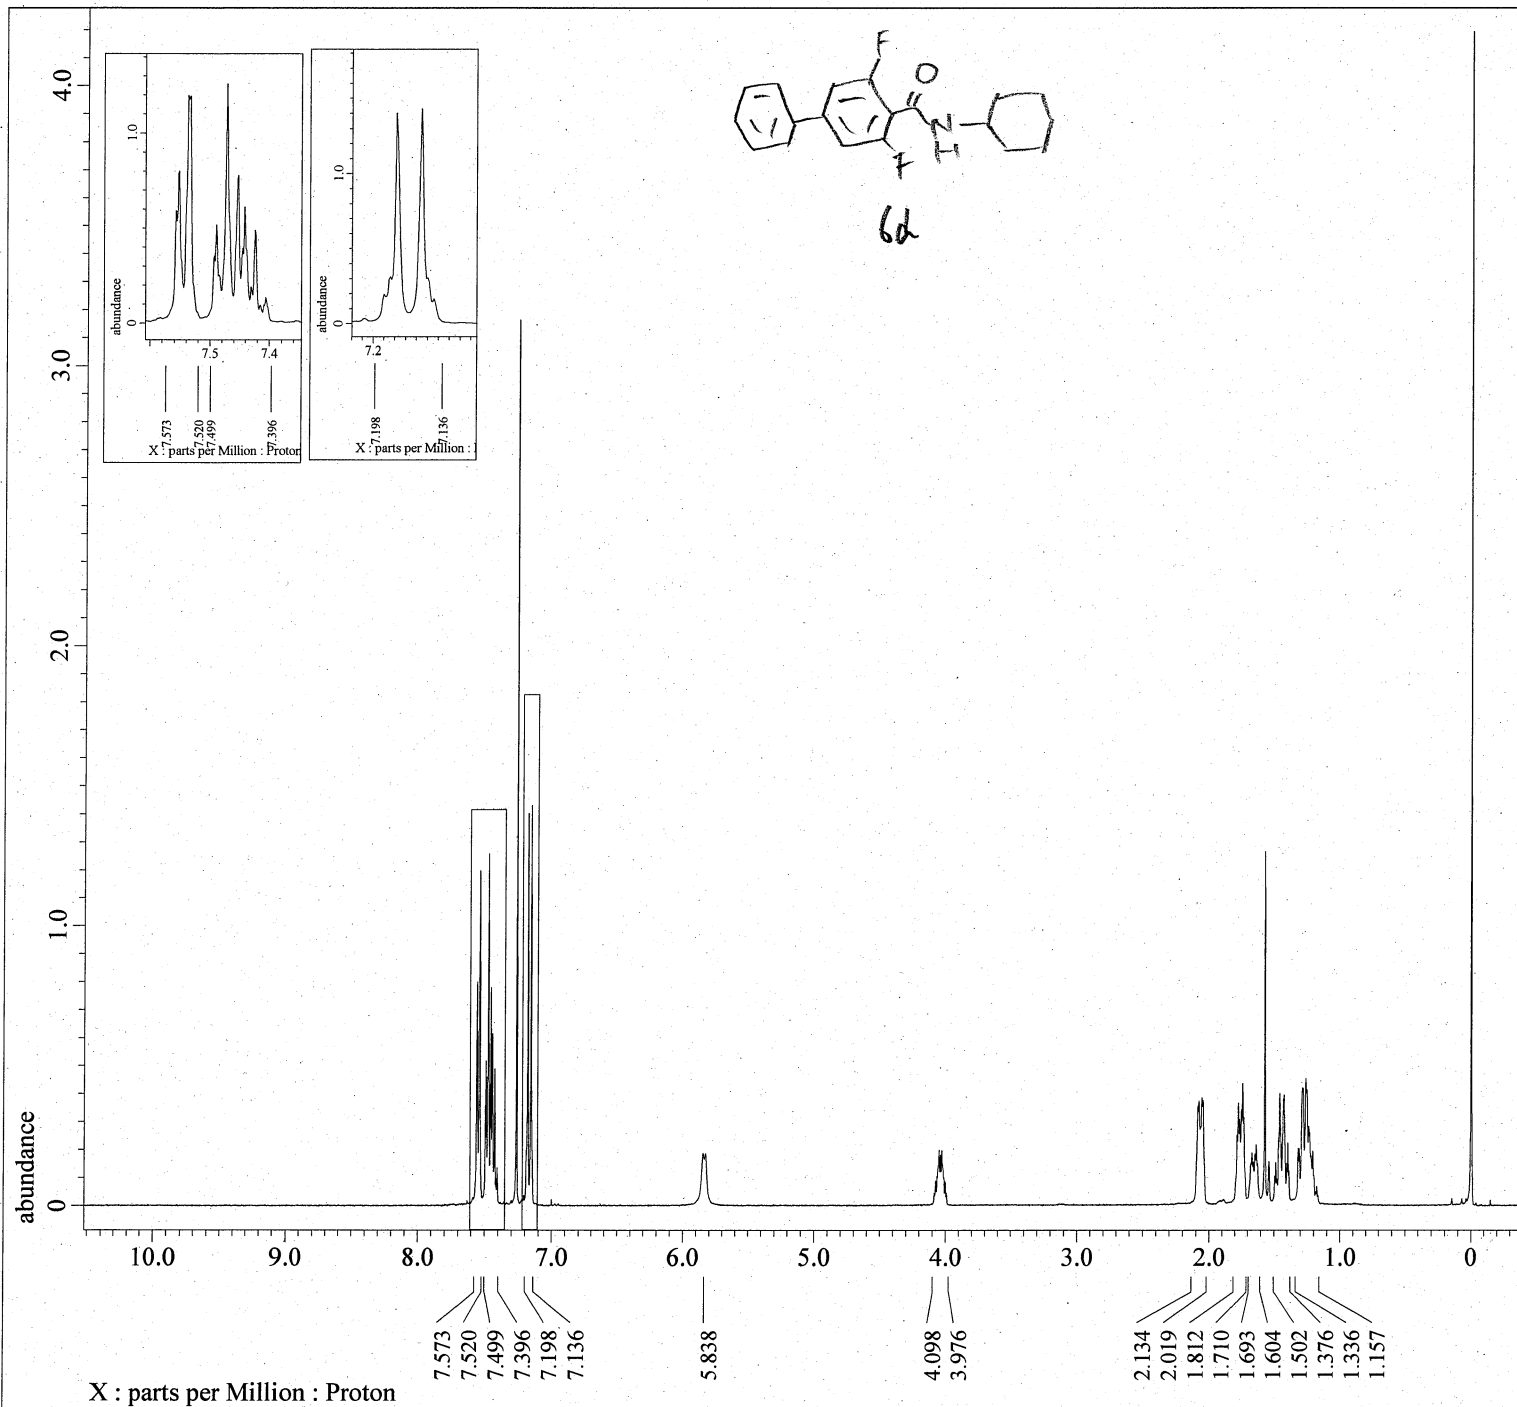

----- PROCESSING PARAMETERS -----  
 dc\_balance( 0, FALSE )  
 sexp( 0.2[Hz], 0.0[s] )  
 trapezoid( 0[%], 0[%], 80[%], 100[%] )  
 zerofill( 1 )  
 fft( 1, TRUE, TRUE )  
 machinephase  
 ppm  
 以下に由来: TKH-1576column-wash\_Proton-1-1.jdf

Filename = TKH-1576column-wash\_Proton-1-1.jdf  
 Author = element  
 Experiment = proton.jxp  
 Sample\_Id = TKH-1576column-wash  
 Solvent = CHLOROFORM-D  
 Actual\_Start\_Time = 5-MAR-2022 14:04:33  
 Revision\_Time = 11-MAR-2022 12:36:49

Comment = single\_pulse  
 Data\_Format = 1D COMPLEX  
 Dim\_Size = 13107  
 X\_Domain = Proton  
 Dim\_Title = Proton  
 Dim\_Units = [ppm]  
 Dimensions = X  
 Spectrometer = DELTA2\_NMR

Field\_Strength = 9.4073814[T] (400[MHz])  
 X\_Acq\_Duration = 2.18103808[s]  
 X\_Domain = 1H  
 X\_Freq = 400.53219825[MHz]  
 X\_Offset = 5[ppm]  
 X\_Points = 16384  
 X\_Prescans = 1  
 X\_Resolution = 0.45849727[Hz]  
 X\_Sweep = 7.51201923[kHz]  
 X\_Sweep\_Clippped = 6.00961538[kHz]  
 Irr\_Domain = Proton  
 Irr\_Freq = 400.53219825[MHz]  
 Irr\_Offset = 5[ppm]  
 Tri\_Domain = Proton  
 Tri\_Freq = 400.53219825[MHz]  
 Tri\_Offset = 5[ppm]  
 Clipped = FALSE  
 Scans = 8  
 Total\_Scans = 8

Relaxation\_Delay = 5[s]  
 Recvr\_Gain = 46  
 Temp\_Get = 18.9[dC]  
 X\_90\_Width = 6[us]  
 X\_Acq\_Time = 2.18103808[s]  
 X\_Angle = 45[deg]  
 X\_Atn = 0.8[dB]  
 X\_Pulse = 3[us]  
 Irr\_Mode = Off  
 Tri\_Mode = Off  
 Dante\_Presat = FALSE  
 Initial\_Wait = 1[s]  
 Repetition\_Time = 7.18103808[s]



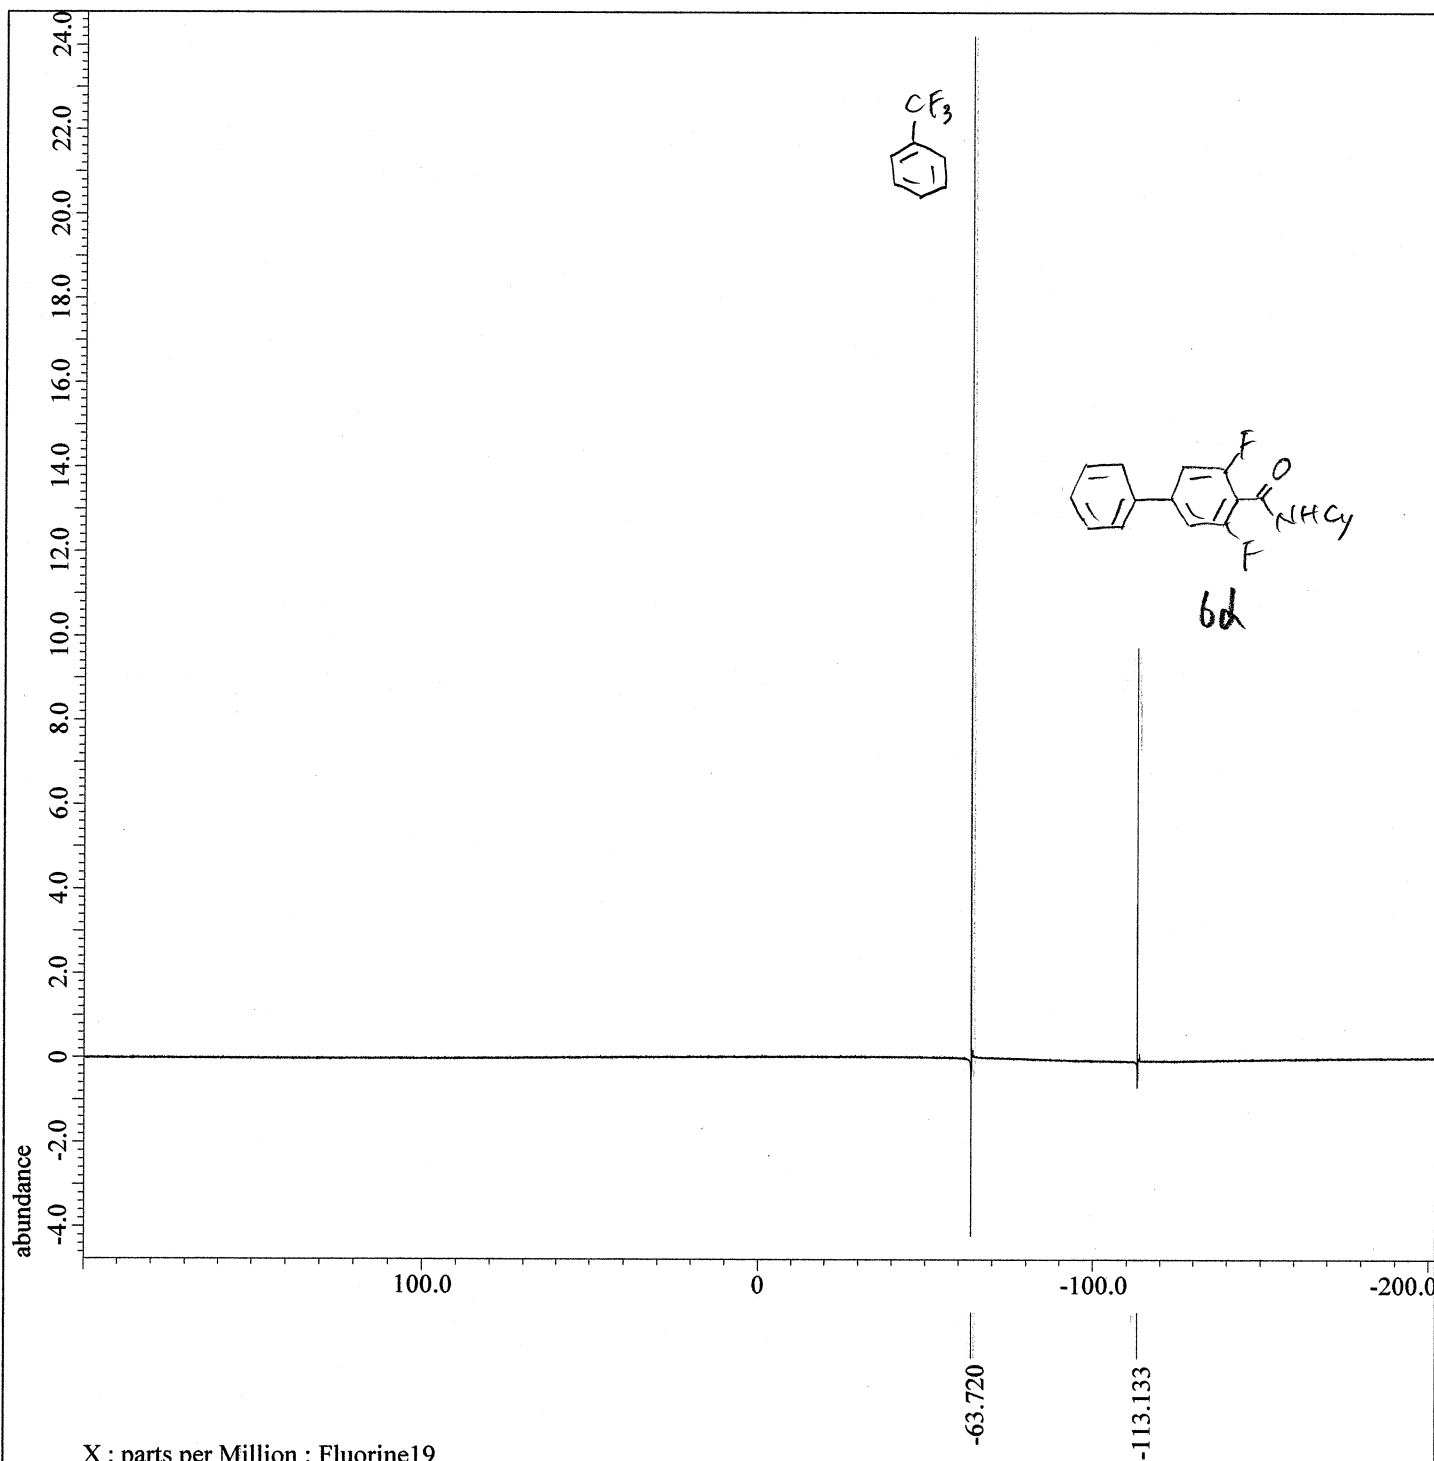

----- PROCESSING PARAMETERS -----  
 dc\_balance( 0, FALSE )  
 secp( 0.2[Hz], 0.0[s] )  
 trapezoid( 0[%], 0[%], 80[%], 100[%] )  
 zerofill( 1 )  
 fft( 1, TRUE, TRUE )  
 machinephase  
 ppm  
 phase( 7, 0, 50[%] )  
 以下に由来: TKH-1576\_F\_standard\_single\_pulse

Filename = TKH-1576\_F\_standard\_sing  
 Author = element  
 Experiment = single\_pulse.jsp  
 Sample Id = TKH-1576 F\_standard  
 Solvent = CHLOROFORM-D  
 Creation Time = 5-MAR-2022 16:06:43  
 Revision Time = 5-MAR-2022 18:56:29  
 Current Time = 5-MAR-2022 18:56:33

Comment = single\_pulse  
 Data Format = 1D COMPLEX  
 Dim Size = 13107  
 Dim Title = Fluorine19  
 Dim Units = [ppm]  
 Dimensions = X  
 Spectrometer = DELTA2\_NMR

Field Strength = 9.4073814[T] (400[MHz])  
 X\_Acq\_Duration = 86.50752[ms]  
 X\_Domain = 19F  
 X\_Freq = 376.87675879[MHz]  
 X\_Offset = 0[ppm]  
 X Points = 16384  
 X\_Prescans = 1  
 X\_Resolution = 11.55968868[Hz]  
 X\_Sweep = 189.39393939[kHz]  
 X\_Sweep\_Clipped = 151.51515152[kHz]  
 Irr\_Domain = Fluorine19  
 Irr\_Freq = 376.87675879[MHz]  
 Irr\_Offset = 5[ppm]  
 Tri\_Domain = Fluorine19  
 Tri\_Freq = 376.87675879[MHz]  
 Tri\_Offset = 5[ppm]  
 Clipped = FALSE  
 Scans = 8  
 Total\_Scans = 8

Relaxation\_Delay = 5[s]  
 Recvr Gain = 44  
 Temp\_Get = 18.8[dC]  
 X\_90\_Width = 6.8[us]  
 X\_Acq\_Time = 86.50752[ms]  
 X\_Angle = 45[deg]  
 X\_Atn = 3[dB]  
 X\_Pulse = 3.4[us]  
 Irr\_Mode = Off  
 Tri\_Mode = Off  
 Dante\_Presat = FALSE  
 Initial\_Wait = 1[s]  
 Repetition\_Time = 5.08650752[s]

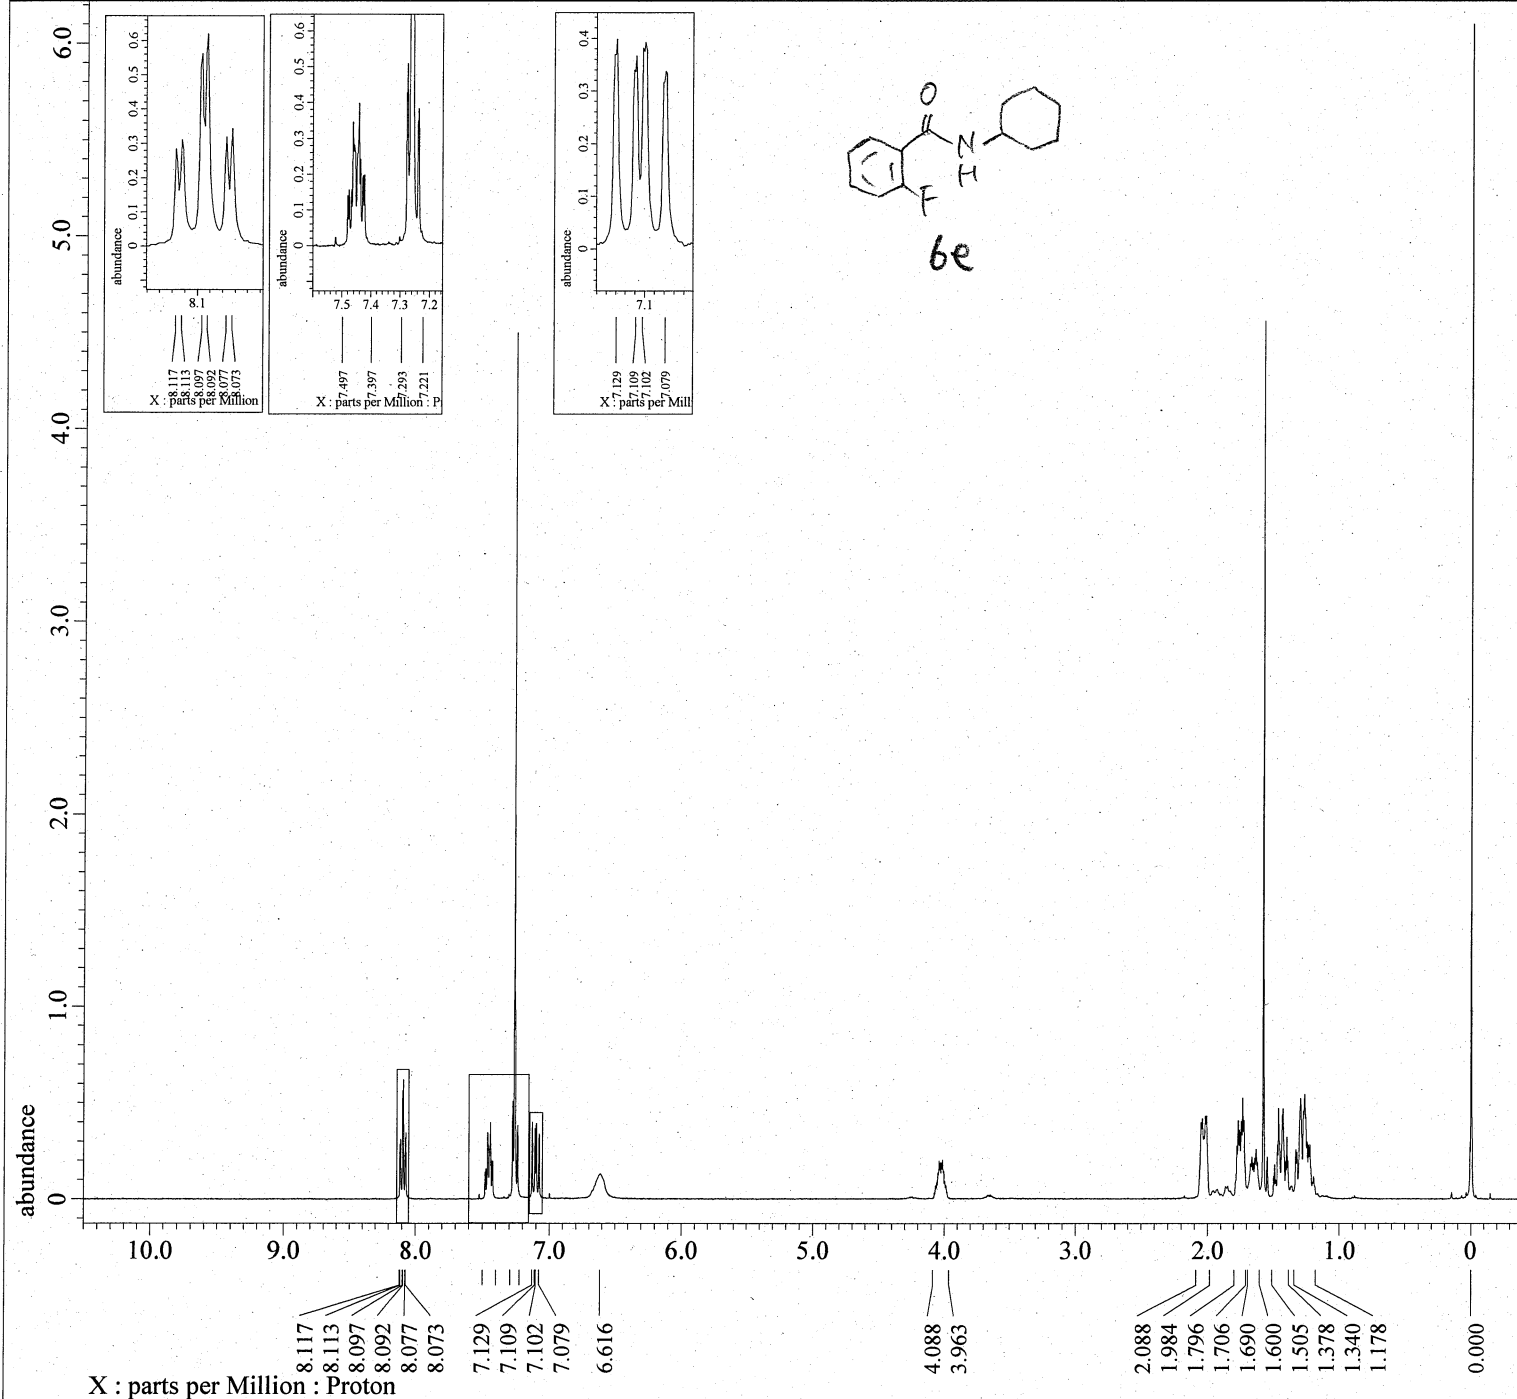

```

---- PROCESSING PARAMETERS ----
dc_balance( 0, FALSE )
sexp( 0.2[Hz], 0.0[s] )
trapezoid( 0[%], 0[%], 80[%], 100[%] )
zerofill( 1 )
fft( 1, TRUE, TRUE )
machinephase
ppm

```

以下に由来: TKH-1427column\_Proton-1-1.jdf

```

Filename      = TKH-1427column_Proton-1-2
Author       = element
Experiment    = proton.jxp
Sample_Id    = TKH-1427column
Solvent      = CHLOROFORM-D
Actual_Start_Time = 27-JUL-2021 13:59:00
Revision_Time  = 15-MAR-2022 16:14:56

```

```

Comment      = single_pulse
Data_Format   = 1D COMPLEX
Dim_Size      = 13107
X_Domain      = Proton
Dim_Title     = Proton
Dim_Units     = [ppm]
Dimensions    = X
Spectrometer  = DELTA2_NMR

```

```

Field_Strength = 9.4073814[T] (400[MHz])
X_Acq_Duration = 2.18103808[s]
X_Domain       = 1H
X_Freq         = 400.53219825[MHz]
X_Offset       = 5[ppm]
X_Points       = 16384
X_Prescans     = 1
X_Resolution   = 0.45849727[Hz]
X_Sweep        = 7.51201923[kHz]
X_Sweep_Clippped = 6.00961538[kHz]
Irr_Domain     = Proton
Irr_Freq       = 400.53219825[MHz]
Irr_Offset     = 5[ppm]
Tri_Domain     = Proton
Tri_Freq       = 400.53219825[MHz]
Tri_Offset     = 5[ppm]
Clipped        = FALSE
Scans          = 8
Total_Scans    = 8

```

```

Relaxation_Delay = 5[s]
Recvr_Gain       = 48
Temp_Get         = 19[dC]
X_90_Width       = 6[us]
X_Acq_Time       = 2.18103808[s]
X_Angle          = 45[deg]
X_Atn            = 0.8[dB]
X_Pulse          = 3[us]
Irr_Mode         = Off
Tri_Mode         = Off
Dante_Presat     = FALSE
Initial_Wait     = 1[s]
Repetition_Time  = 7.18103808[s]

```

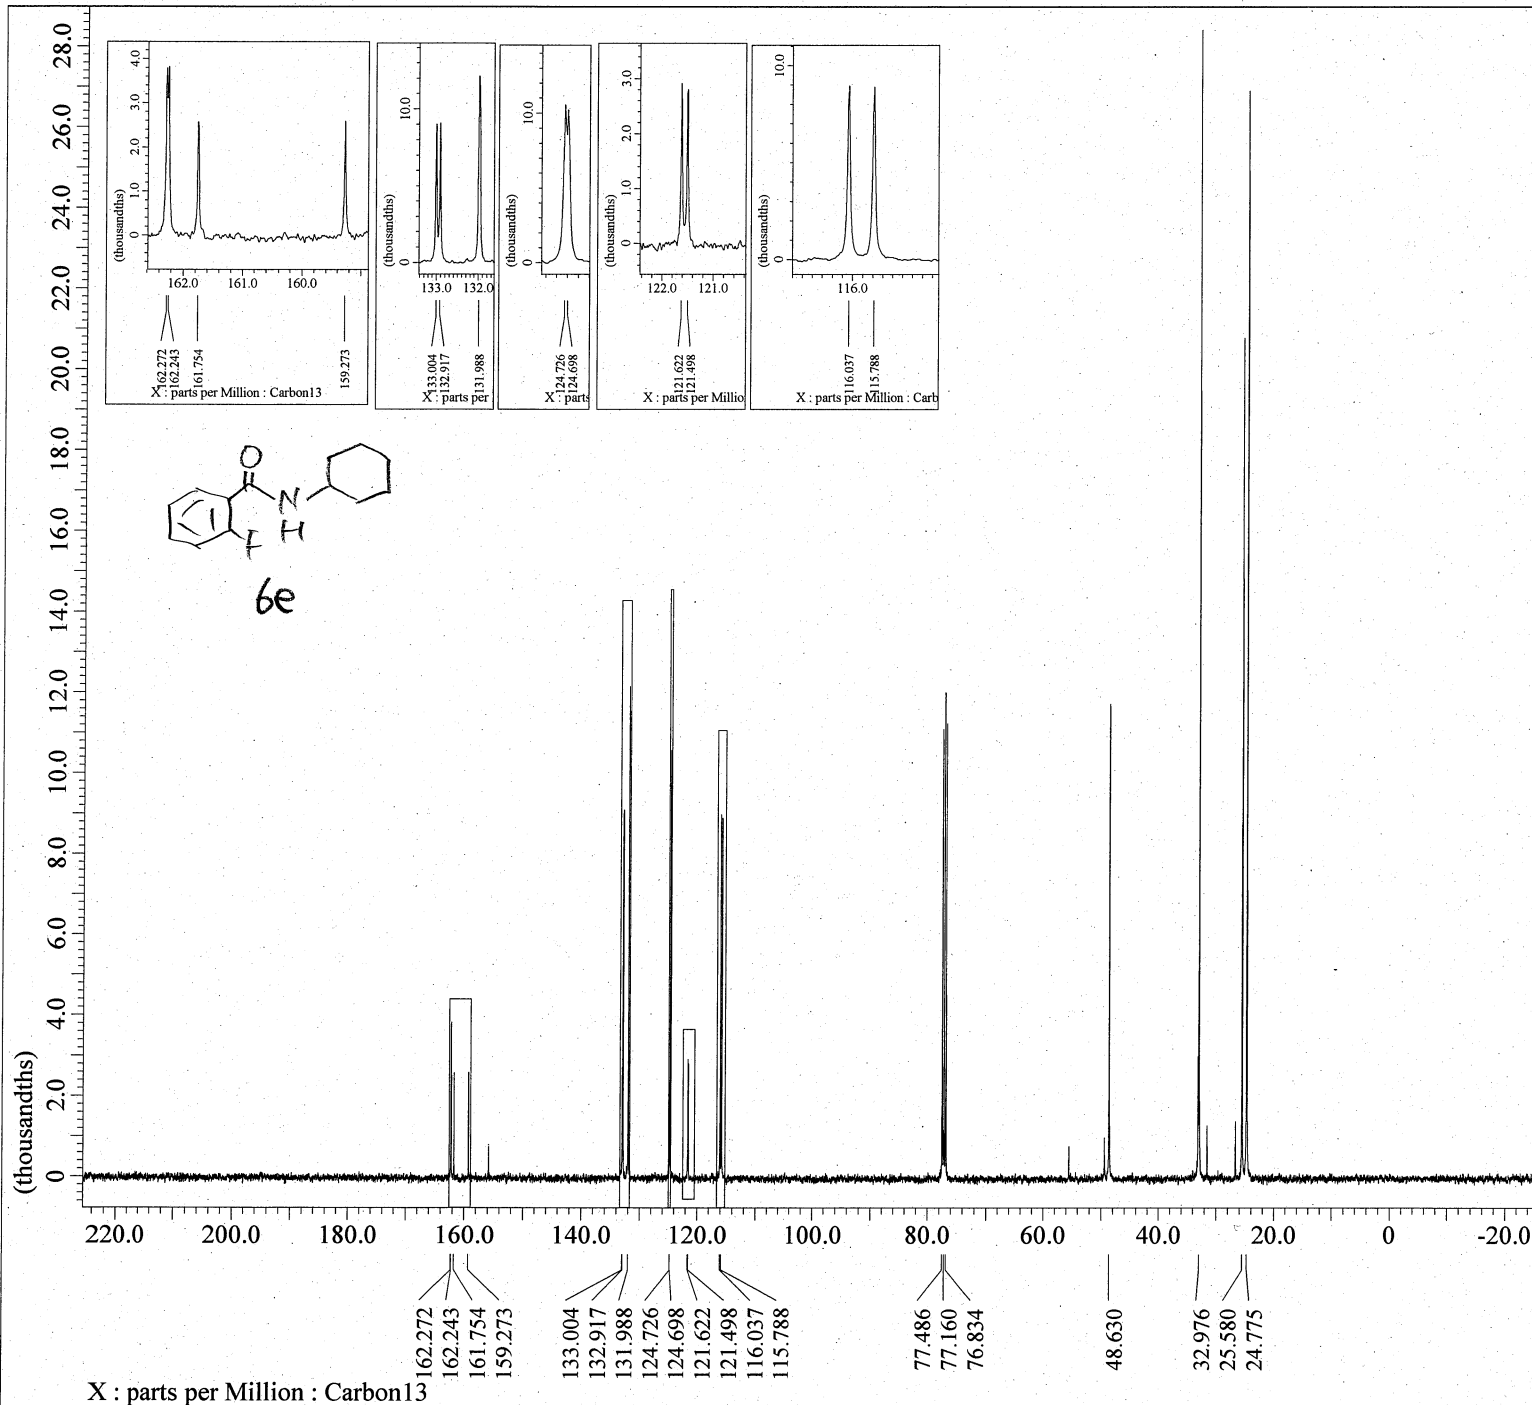

----- PROCESSING PARAMETERS -----  
 sexp( 2.0[Hz], 0.0[s] )  
 trapezoid( 0[%], 0[%], 80[%], 100[%] )  
 zerofill( 1 )  
 fft( 1, TRUE, TRUE )  
 machinephase  
 ppm

以下に由来: TKH-1427\_carbon-1-1.jdf

Filename = TKH-1427\_carbon-1-  
 Author = element  
 Experiment = carbon.jxp  
 Sample\_Id = TKH-1427  
 Solvent = CHLOROFORM-D  
 Actual\_Start\_Time = 9-MAR-2022 14:27:  
 Revision\_Time = 10-MAR-2022 20:08:

Comment = single pulse decou  
 Data Format = 1D COMPLEX  
 Dim\_Size = 26214  
 X\_Domain = Carbon13  
 Dim\_Title = Carbon13  
 Dim\_Units = [ppm]  
 Dimensions = X  
 Spectrometer = DELTA2\_NMR

Field\_Strength = 9.2982153[T] (400[  
 X\_Acq\_Duration = 1.048576[s]  
 X\_Domain = Carbon13  
 X\_Freq = 99.54517646[MHz]  
 X\_Offset = 100[ppm]  
 X\_Points = 32768  
 X\_Prescans = 4  
 X\_Resolution = 0.95367432[Hz]  
 X\_Sweep = 31.25[kHz]  
 X\_Sweep\_Clippped = 25[kHz]  
 Irr\_Domain = Proton  
 Irr\_Freq = 395.88430144[MHz]  
 Irr\_Offset = 5[ppm]  
 Blanking = 5[us]  
 Clipped = TRUE  
 Scans = 400  
 Total\_Scans = 400

Relaxation\_Delay = 2[s]  
 Recvr\_Gain = 50  
 Temp\_Get = 18[dC]  
 X\_90\_Width = 9.65[us]  
 X\_Acq\_Time = 1.048576[s]  
 X\_Angle = 30[deg]  
 X\_Atn = 8[dB]  
 X\_Pulse = 3.21666667[us]  
 Irr\_Atn\_Dec = 25.059[dB]  
 Irr\_Atn\_Dec\_Calc = 25.059[dB]  
 Irr\_Atn\_Dec\_Default\_Calc = 25.059[dB]  
 Irr\_Atn\_No = 25.059[dB]  
 Irr\_Dec\_Bandwidth\_Hz = 4.7826087[kHz]  
 Irr\_Dec\_Bandwidth\_Ppm = 12.08082432[ppm]  
 Irr\_Dec\_Freq = 395.88430144[MHz]  
 Irr\_Dec\_Merit\_Factor = 2.2  
 Irr\_Decoupling = TRUE  
 Irr\_No = TRUE  
 Irr\_Noise = WALTZ  
 Irr\_Offset\_Default = 5[ppm]

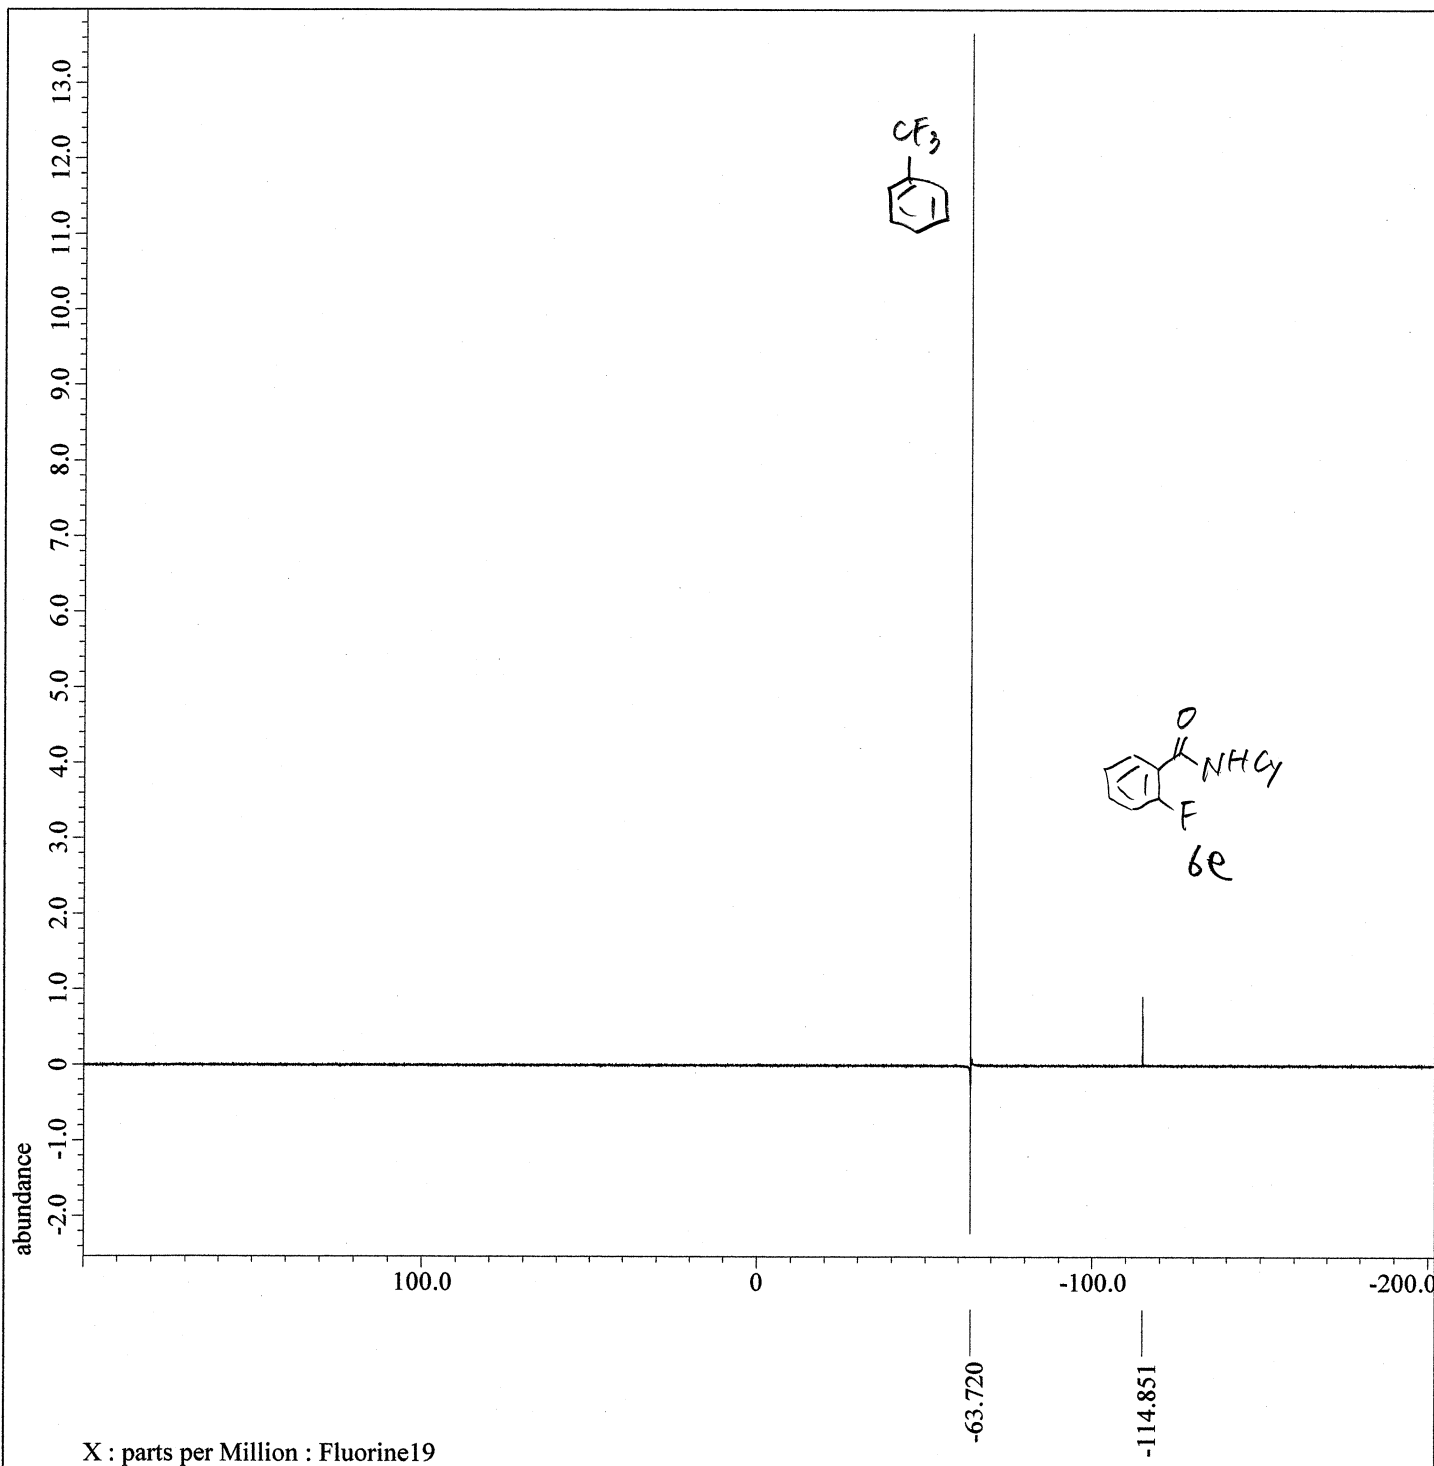

----- PROCESSING PARAMETERS -----  
 dc\_balance( 0, FALSE )  
 sexp( 0.2[Hz], 0.0[s] )  
 trapezoid( 0[%], 0[%], 80[%], 100[%] )  
 zerofill( 1 )  
 blip( 16, 64, 32 )  
 fft( 1, TRUE, TRUE )  
 machinephase  
 ppm  
 phase( -25, 0, 50[%] )  
 以下に由来: TKH-1427\_F\_standard\_single\_pulse

Filename = TKH-1427\_F\_standard\_sing  
 Author = element  
 Experiment = single\_pulse.jxp  
 Sample Id = TKH-1427\_F\_standard  
 Solvent = CHLOROFORM-D  
 Creation Time = 5-MAR-2022 18:54:28  
 Revision Time = 5-MAR-2022 18:27:49  
 Current Time = 5-MAR-2022 18:27:55

Comment = single\_pulse  
 Data Format = 1D COMPLEX  
 Dim\_Size = 13107  
 Dim\_Title = Fluorine19  
 Dim\_Units = [ppm]  
 Dimensions = X  
 Spectrometer = DELTA2\_NMR

Field Strength = 9.4073814[T] (400[MHz])  
 X\_Acq\_Duration = 86.50752[ms]  
 X\_Domain = 19F  
 X\_Freq = 376.87675879[MHz]  
 X\_Offset = 0[ppm]  
 X Points = 16384  
 X\_Prescans = 1  
 X\_Resolution = 11.55968868[Hz]  
 X\_Sweep = 189.39393939[kHz]  
 X\_Sweep\_Clippped = 151.51515152[kHz]  
 Irr\_Domain = Fluorine19  
 Irr\_Freq = 376.87675879[MHz]  
 Irr\_Offset = 5[ppm]  
 Tri\_Domain = Fluorine19  
 Tri\_Freq = 376.87675879[MHz]  
 Tri\_Offset = 5[ppm]  
 Clipped = FALSE  
 Scans = 8  
 Total\_Scans = 8

Relaxation\_Delay = 5[s]  
 Recvr\_Gain = 42  
 Temp\_Get = 18.3[dC]  
 X\_90\_Width = 6.8[us]  
 X\_Acq\_Time = 86.50752[ms]  
 X\_Angle = 45[deg]  
 X\_Atn = 3[dB]  
 X\_Pulse = 3.4[us]  
 Irr\_Mode = Off  
 Tri\_Mode = Off  
 Dante\_Presat = FALSE  
 Initial\_Wait = 1[s]  
 Repetition\_Time = 5.08650752[s]



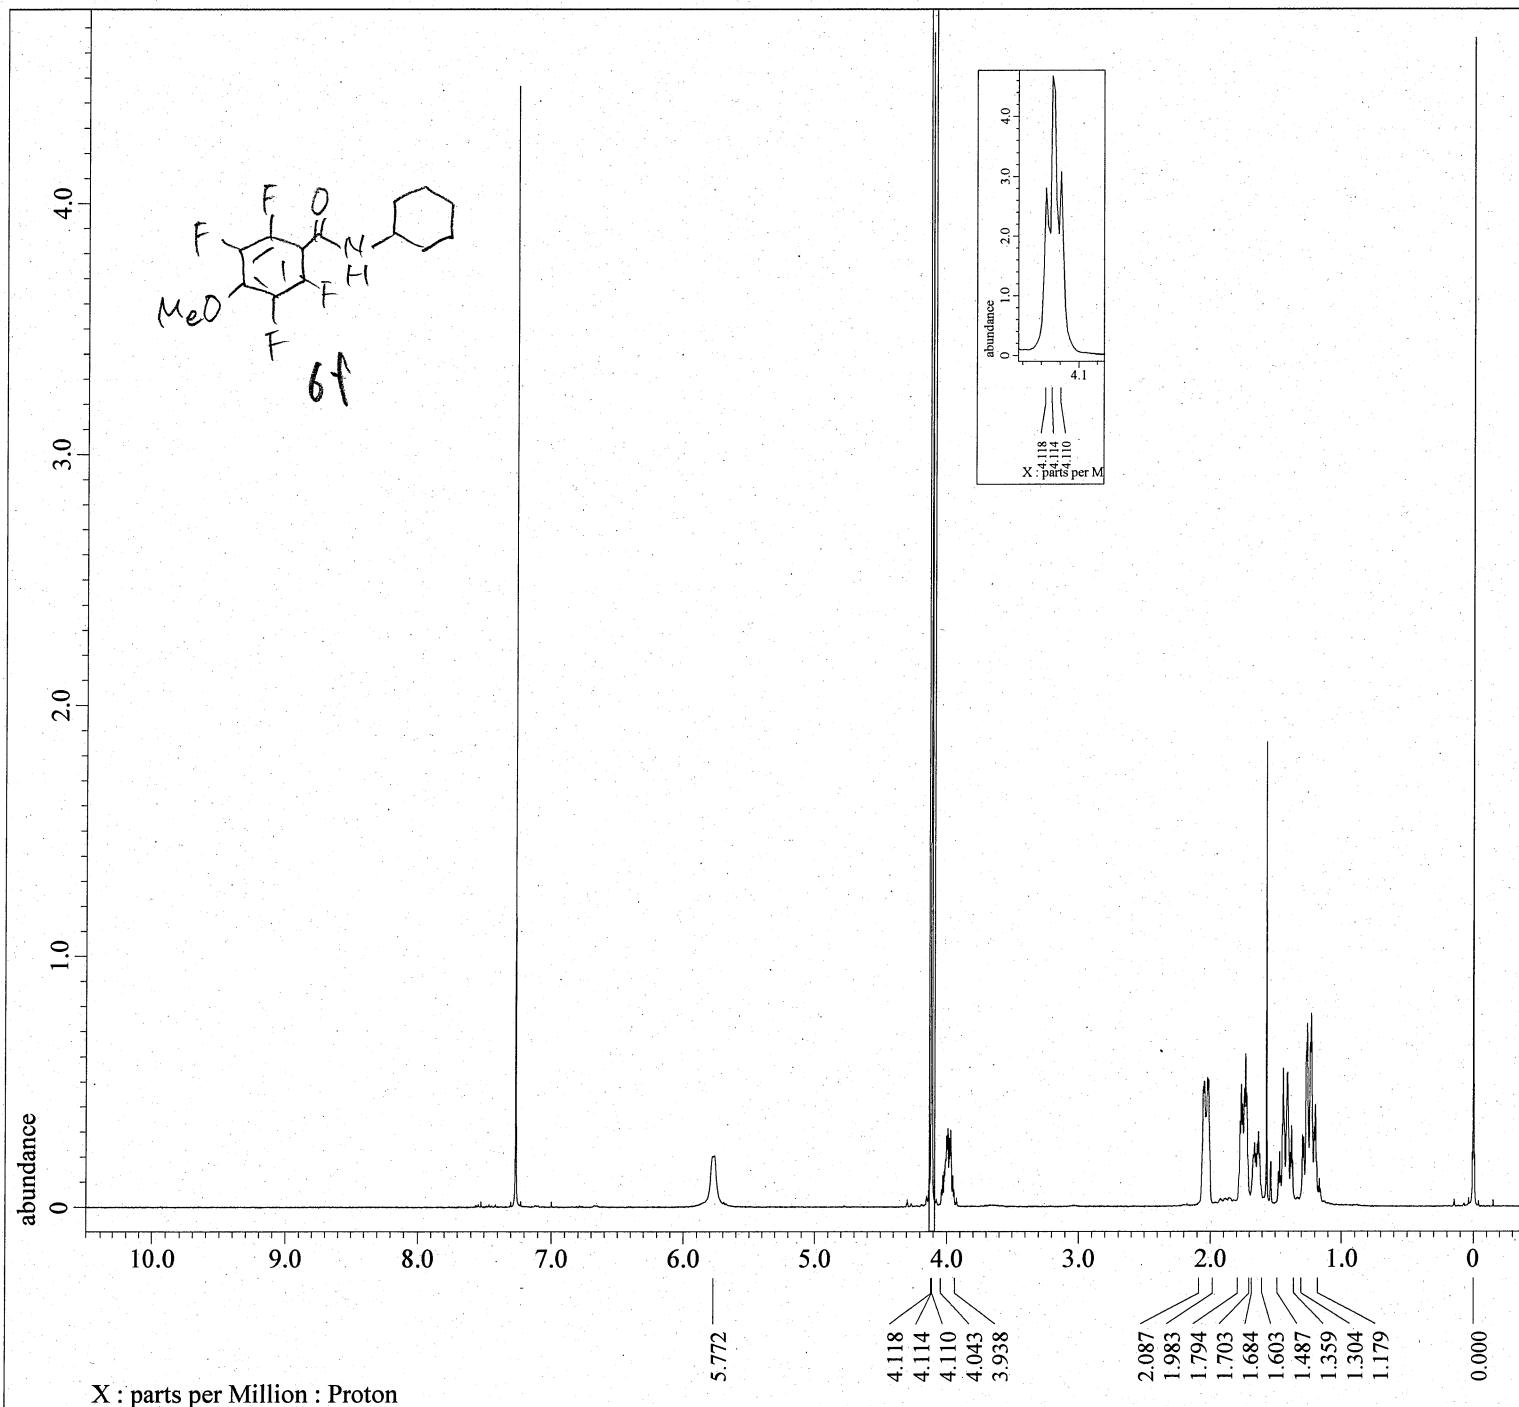

----- PROCESSING PARAMETERS -----  
 dc\_balance( 0, FALSE )  
 sexp( 0.2[Hz], 0.0[s] )  
 trapezoid( 0[%], 0[%], 80[%], 100[%] )  
 zerofill( 1 )  
 fft( 1, TRUE, TRUE )  
 machinephase  
 ppm

以下に由来:: TKH-1558column\_Proton-1-1.jdf

Filename = TKH-1558column\_Proton-1-2  
 Author = element  
 Experiment = proton.jxp  
 Sample\_Id = TKH-1558column  
 Solvent = CHLOROFORM-D  
 Actual\_Start\_Time = 14-FEB-2022 20:48:43  
 Revision\_Time = 11-MAR-2022 12:47:28

Comment = single\_pulse  
 Data\_Format = 1D COMPLEX  
 Dim\_Size = 13107  
 X\_Domain = Proton  
 Dim\_Title = Proton  
 Dim\_Units = [ppm]  
 Dimensions = X  
 Spectrometer = DELTA2\_NMR

Field\_Strength = 9.4073814[T] (400[MHz])  
 X\_Acq\_Duration = 2.18103808[s]  
 X\_Domain = 1H  
 X\_Freq = 400.53219825[MHz]  
 X\_Offset = 5[ppm]  
 X\_Points = 16384  
 X\_Prescans = 1  
 X\_Resolution = 0.45849727[Hz]  
 X\_Sweep = 7.51201923[kHz]  
 X\_Sweep\_Clippped = 6.00961538[kHz]  
 Irr\_Domain = Proton  
 Irr\_Freq = 400.53219825[MHz]  
 Irr\_Offset = 5[ppm]  
 Tri\_Domain = Proton  
 Tri\_Freq = 400.53219825[MHz]  
 Tri\_Offset = 5[ppm]  
 Clipped = FALSE  
 Scans = 8  
 Total\_Scans = 8

Relaxation\_Delay = 5[s]  
 Recvr\_Gain = 46  
 Temp\_Get = 19.1[dC]  
 X\_90\_Width = 6[us]  
 X\_Acq\_Time = 2.18103808[s]  
 X\_Angle = 45[deg]  
 X\_Atn = 0.8[dB]  
 X\_Pulse = 3[us]  
 Irr\_Mode = Off  
 Tri\_Mode = Off  
 Dante\_Presat = FALSE  
 Initial\_Wait = 1[s]  
 Repetition\_Time = 7.18103808[s]

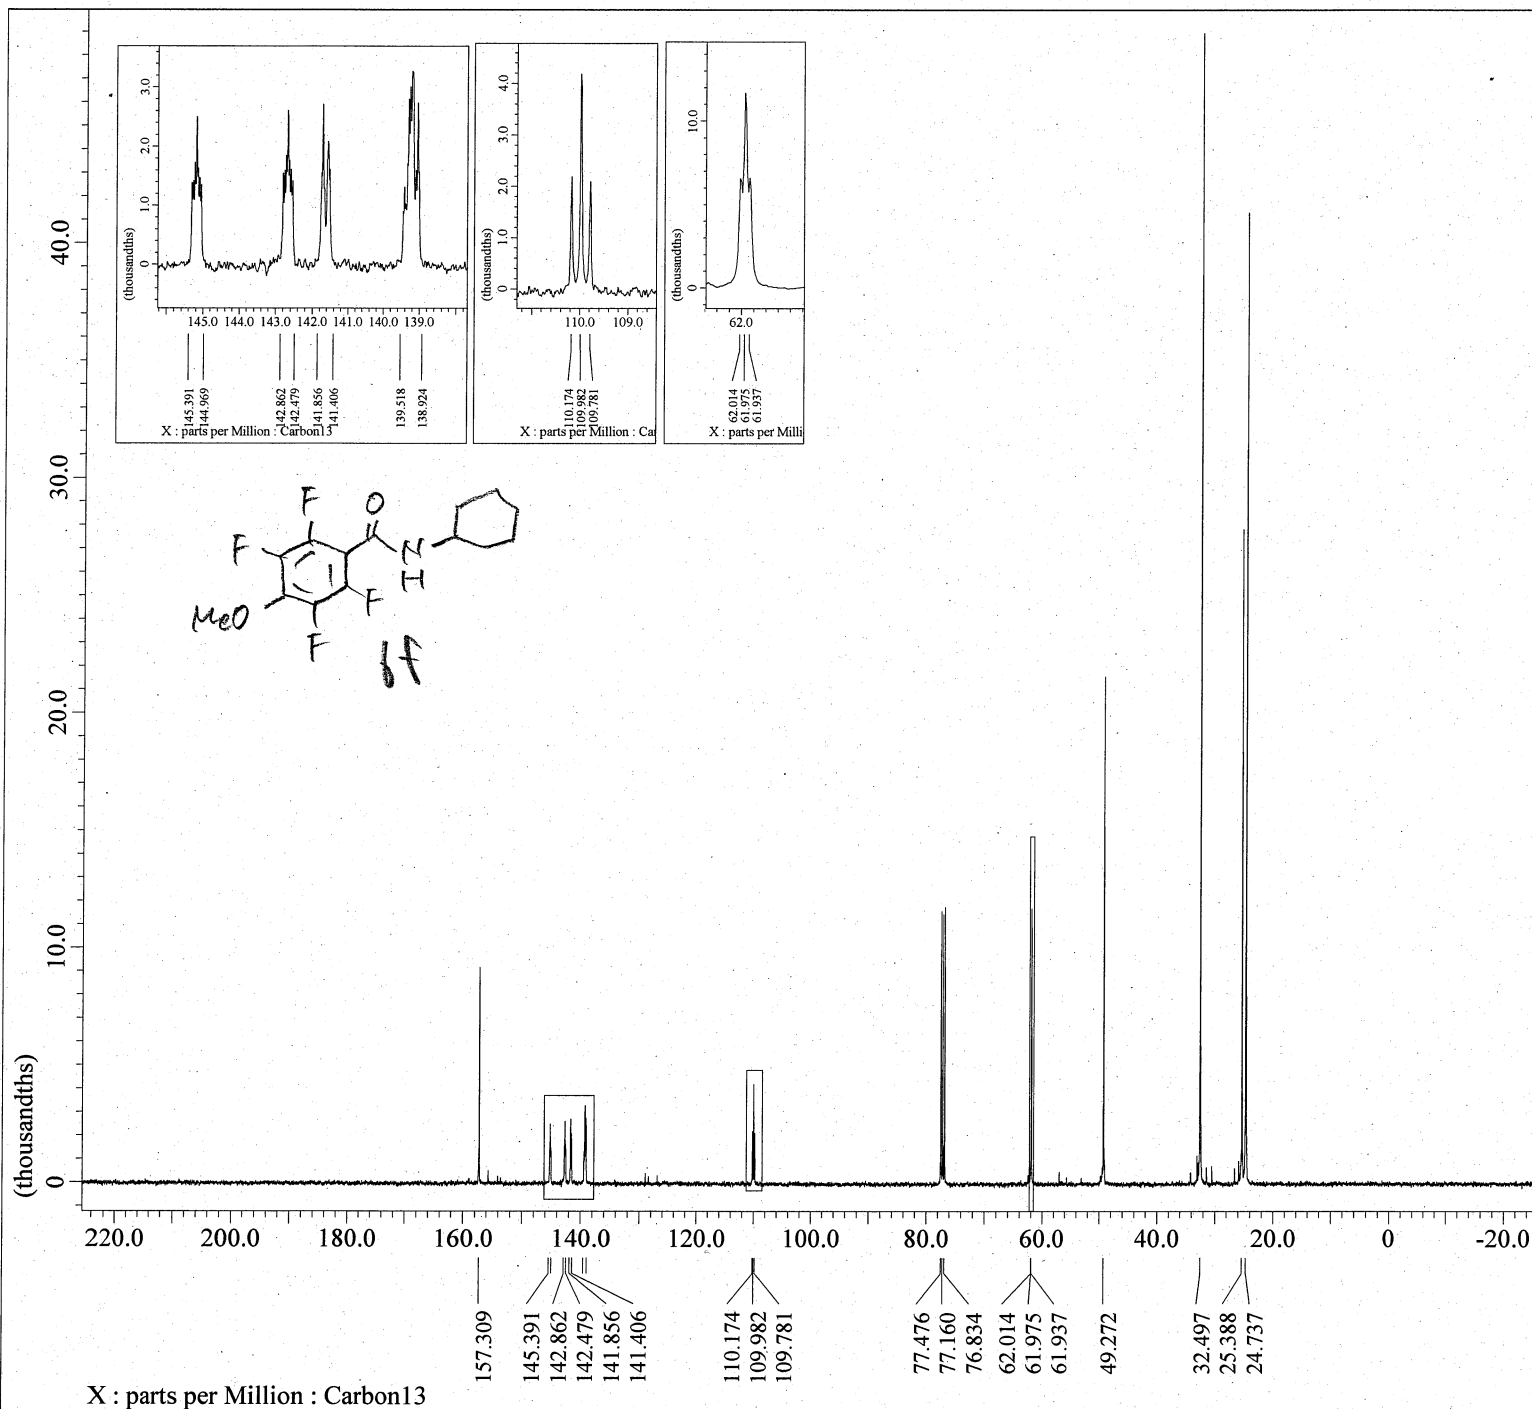

```

---- PROCESSING PARAMETERS ----
sexp( 2.0[Hz], 0.0[s] )
trapezoid( 0[%], 0[%], 80[%], 100[%] )
zerofill( 1 )
fft( 1, TRUE, TRUE )
machinephase
ppm

```

```

Filename           = TKH-1558_carbon-1-
Author             = element
Experiment         = carbon.jpg
Sample_Id          = TKH-1558
Solvent            = CHLOROFORM-D
Actual Start Time  = 9-MAR-2022 15:29:
Revision Time      = 10-MAR-2022 20:14:

```

```
Field_Strength      = 9.2982153[T]  (400 [T])
X_Acq_Duration      = 1.048576[s]
X_Domain            = Carbon13
X_Freq              = 99.54517646 [MHz]
X_Offset            = 100 [ppm]
X_Points            = 32768
X_Prescans          = 4
X_Resolution        = 0.95367432 [Hz]
X_Sweep             = 31.25 [kHz]
X_Sweep_Clippped    = 25 [kHz]
Irr_Domain           = Proton
Irr_Freq            = 395.88430144 [MHz]
Irr_Offset          = 5 [ppm]
Blanking            = 5 [us]
Clipped             = TRUE
Scans               = 400
Total_Scans         = 400
```

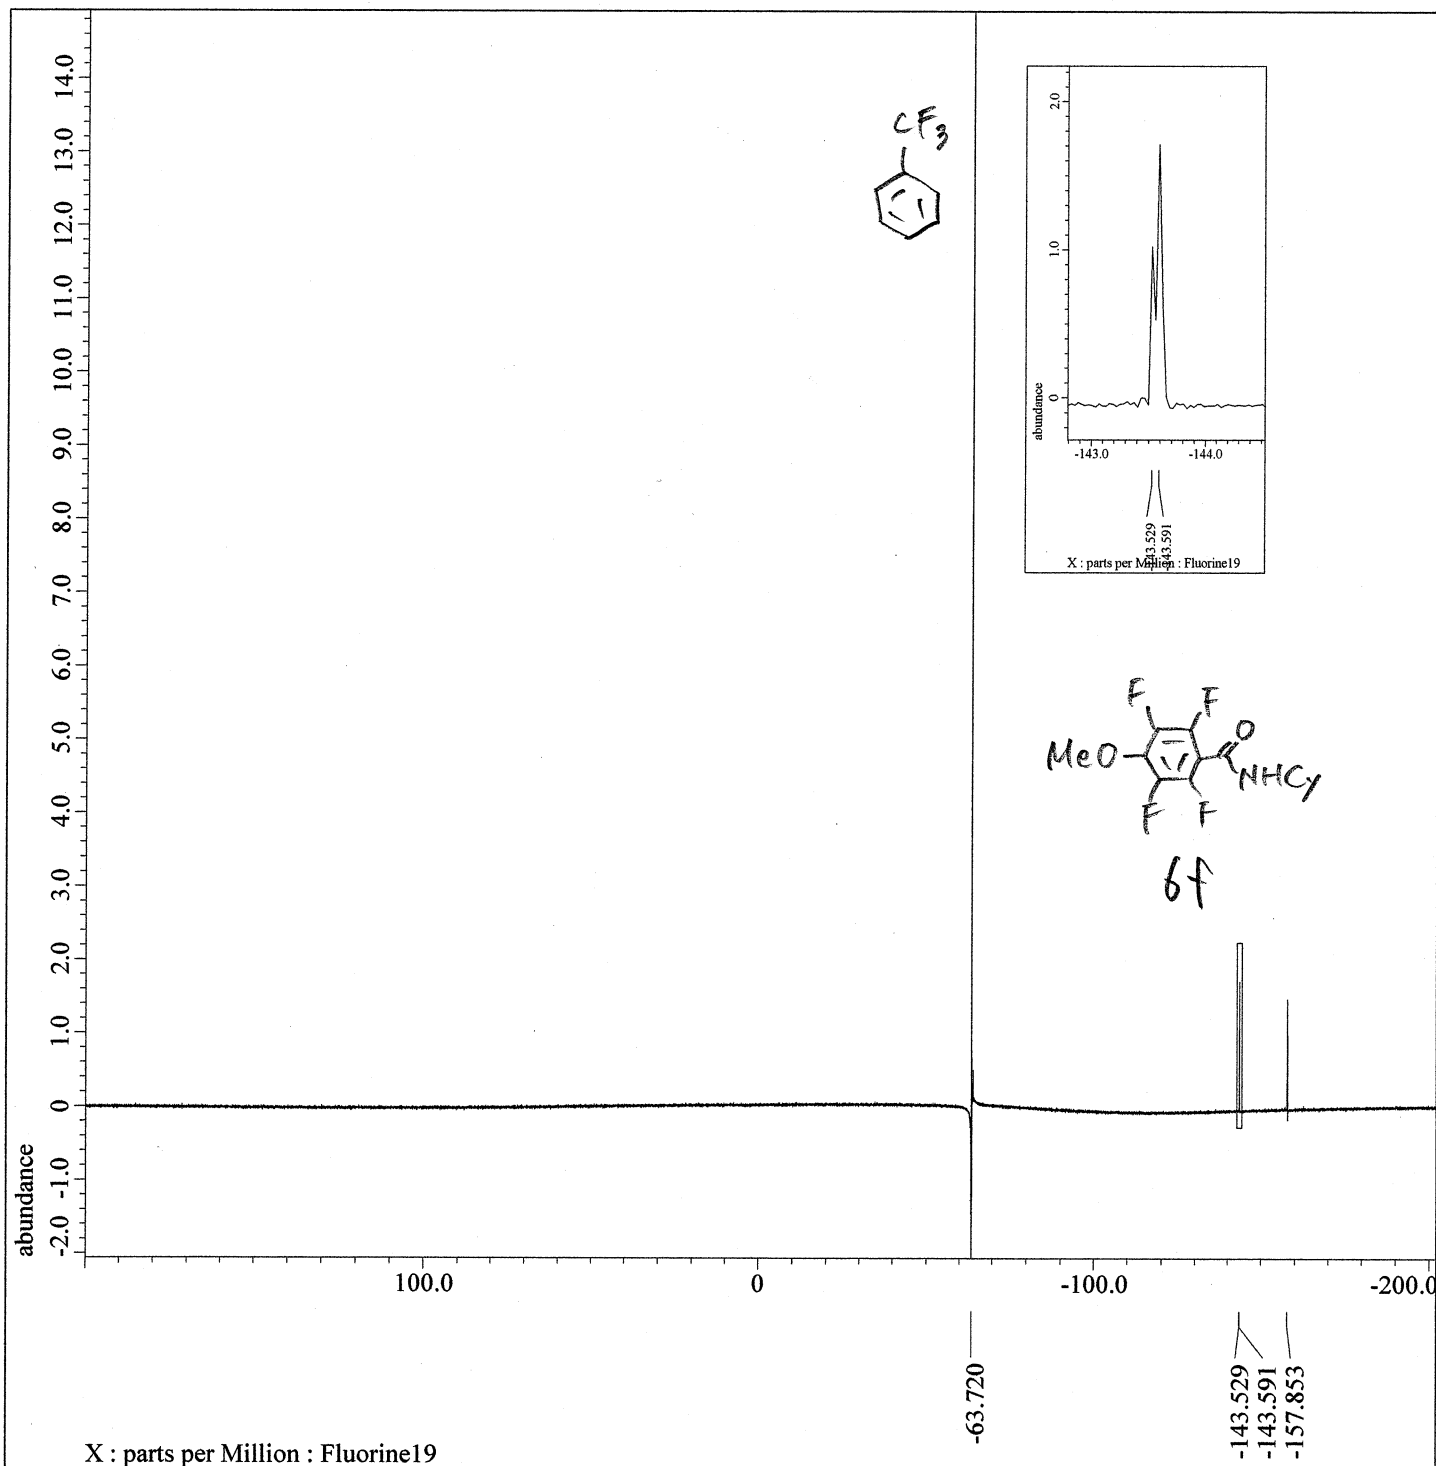

----- PROCESSING PARAMETERS -----  
 dc\_balance( 0, FALSE )  
 sexp( 0.2[Hz], 0.0[s] )  
 trapezoid( 0[%], 0[%], 80[%], 100[%] )  
 zerofill( 1 )  
 fft( 1, TRUE, TRUE )  
 machinephase  
 ppm  
 phase( 85, 0, 50[%] )  
 以下に由来: TKH-1558\_F\_standard\_single\_pulse

Filename = TKH-1558\_F\_standard\_sing  
 Author = element  
 Experiment = single\_pulse.jxp  
 Sample\_Id = TKH-1558 F standard  
 Solvent = CHLOROFORM-D  
 Creation\_Time = 5-MAR-2022 17:01:49  
 Revision\_Time = 5-MAR-2022 18:58:03  
 Current\_Time = 5-MAR-2022 18:58:27

Comment = single\_pulse  
 Data\_Format = 1D COMPLEX  
 Dim\_Size = 13107  
 Dim\_Title = Fluorine19  
 Dim\_Units = [ppm]  
 Dimensions = X  
 Spectrometer = DELTA2\_NMR

Field\_Strength = 9.4073814[T] (400[MHz])  
 X\_Acq\_Duration = 86.50752[ms]  
 X\_Domain = 19F  
 X\_Freq = 376.87675879[MHz]  
 X\_Offset = 0[ppm]  
 X\_Points = 16384  
 X\_Prescans = 1  
 X\_Resolution = 11.55968868[Hz]  
 X\_Sweep = 189.39393939[kHz]  
 X\_Sweep\_Clippped = 151.51515152[kHz]  
 Irr\_Domain = Fluorine19  
 Irr\_Freq = 376.87675879[MHz]  
 Irr\_Offset = 5[ppm]  
 Tri\_Domain = Fluorine19  
 Tri\_Freq = 376.87675879[MHz]  
 Tri\_Offset = 5[ppm]  
 Clipped = FALSE  
 Scans = 8  
 Total\_Scans = 8

Relaxation\_Delay = 5[s]  
 Recvr\_Gain = 44  
 Temp\_Get = 18.9[dC]  
 X\_90\_Width = 6.8[us]  
 X\_Acq\_Time = 86.50752[ms]  
 X\_Angle = 45[deg]  
 X\_Atn = 3[dB]  
 X\_Pulse = 3.4[us]  
 Irr\_Mode = Off  
 Tri\_Mode = Off  
 Dante\_Presat = FALSE  
 Initial\_Wait = 1[s]  
 Repetition\_Time = 5.08650752[s]

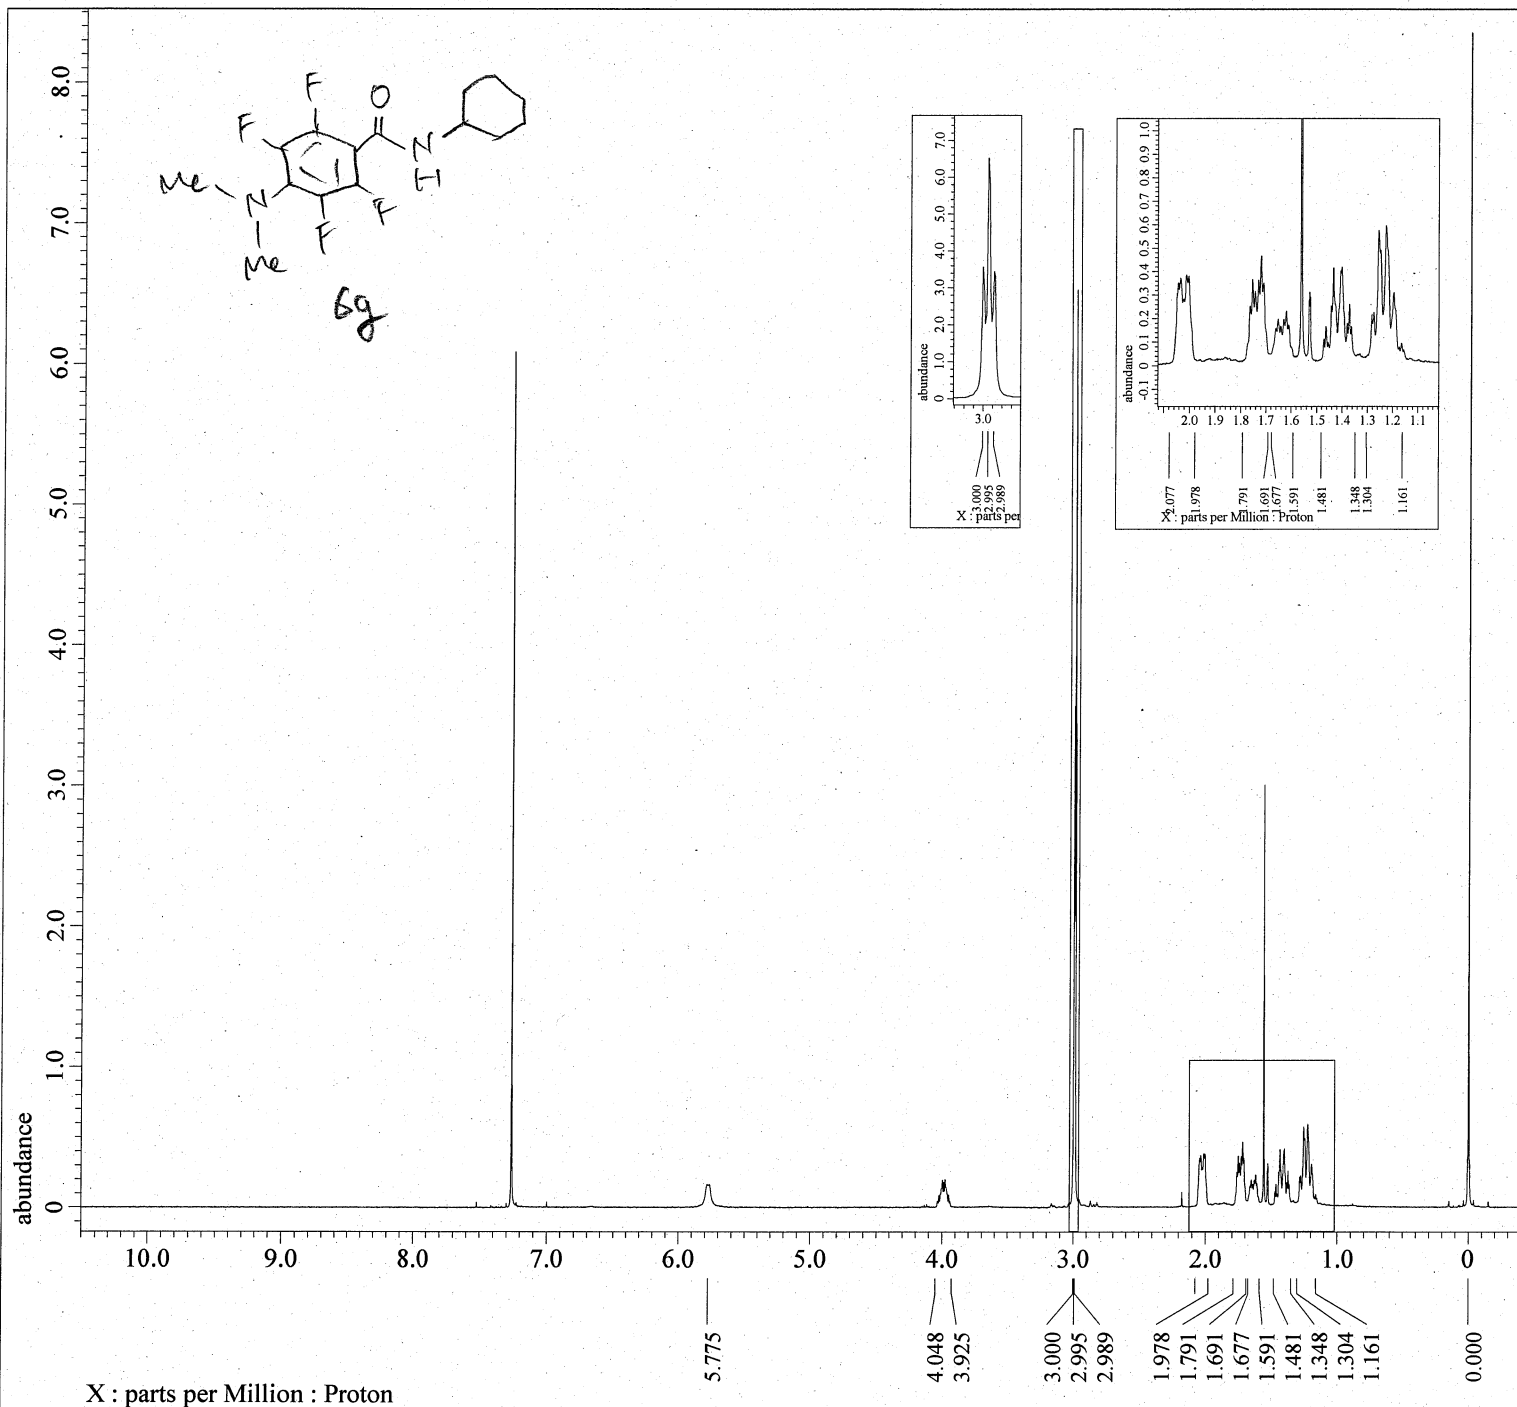

----- PROCESSING PARAMETERS -----

```

dc_balance( 0, FALSE )
sexp( 0.2[Hz], 0.0[s] )
trapezoid( 0[%], 0[%], 80[%], 100[%] )
zerofill( 1 )
fft( 1, TRUE, TRUE )
machinephase
ppm
reference( -0.01731[ppm], 0[ppm] )
phase( 2, 0, 50[%] )

```

以下に由来: TKH-1559column\_Proton-1-1.jdf

```

Filename      = TKH-1559column_Proton-1-2
Author       = element
Experiment   = proton.jxp
Sample_Id    = TKH-1559column
Solvent      = CHLOROFORM-D
Actual_Start_Time = 15-FEB-2022 10:10:17
Revision_Time   = 11-MAR-2022 12:52:32

```

```

Comment      = single pulse
Data_Format  = 1D COMPLEX
Dim_Size     = 13107
X_Domain     = Proton
Dim_Title    = Proton
Dim_Units    = [ppm]
Dimensions   = X
Spectrometer = DELTA2_NMR

```

```

Field_Strength = 9.4073814[T] (400[MHz])
X_Acq_Duration = 2.18103808[s]
X_Domain      = 1H
X_Freq        = 400.53219825[MHz]
X_Offset      = 5[ppm]
X_Points      = 16384
X_Prescans    = 1
X_Resolution  = 0.45849727[Hz]
X_Sweep       = 7.51201923[kHz]
X_Sweep_Clippped = 6.00961538[kHz]
Irr_Domain    = Proton
Irr_Freq      = 400.53219825[MHz]
Irr_Offset    = 5[ppm]
Tri_Domain    = Proton
Tri_Freq      = 400.53219825[MHz]
Tri_Offset    = 5[ppm]
Clipped       = FALSE
Scans         = 8
Total_Scans   = 8

```

```

Relaxation_Delay = 5[s]
Recvr_Gain       = 50
Temp_Get         = 19[dc]
X_90_Width       = 6[us]
X_Acq_Time       = 2.18103808[s]
X_Angle          = 45[deg]
X_Atn            = 0.8[dB]
X_Pulse          = 3[us]
Irr_Mode         = Off
Tri_Mode         = Off
Dante_Presat     = FALSE
Initial_Wait     = 1[s]
Repetition_Time  = 7.18103808[s]

```

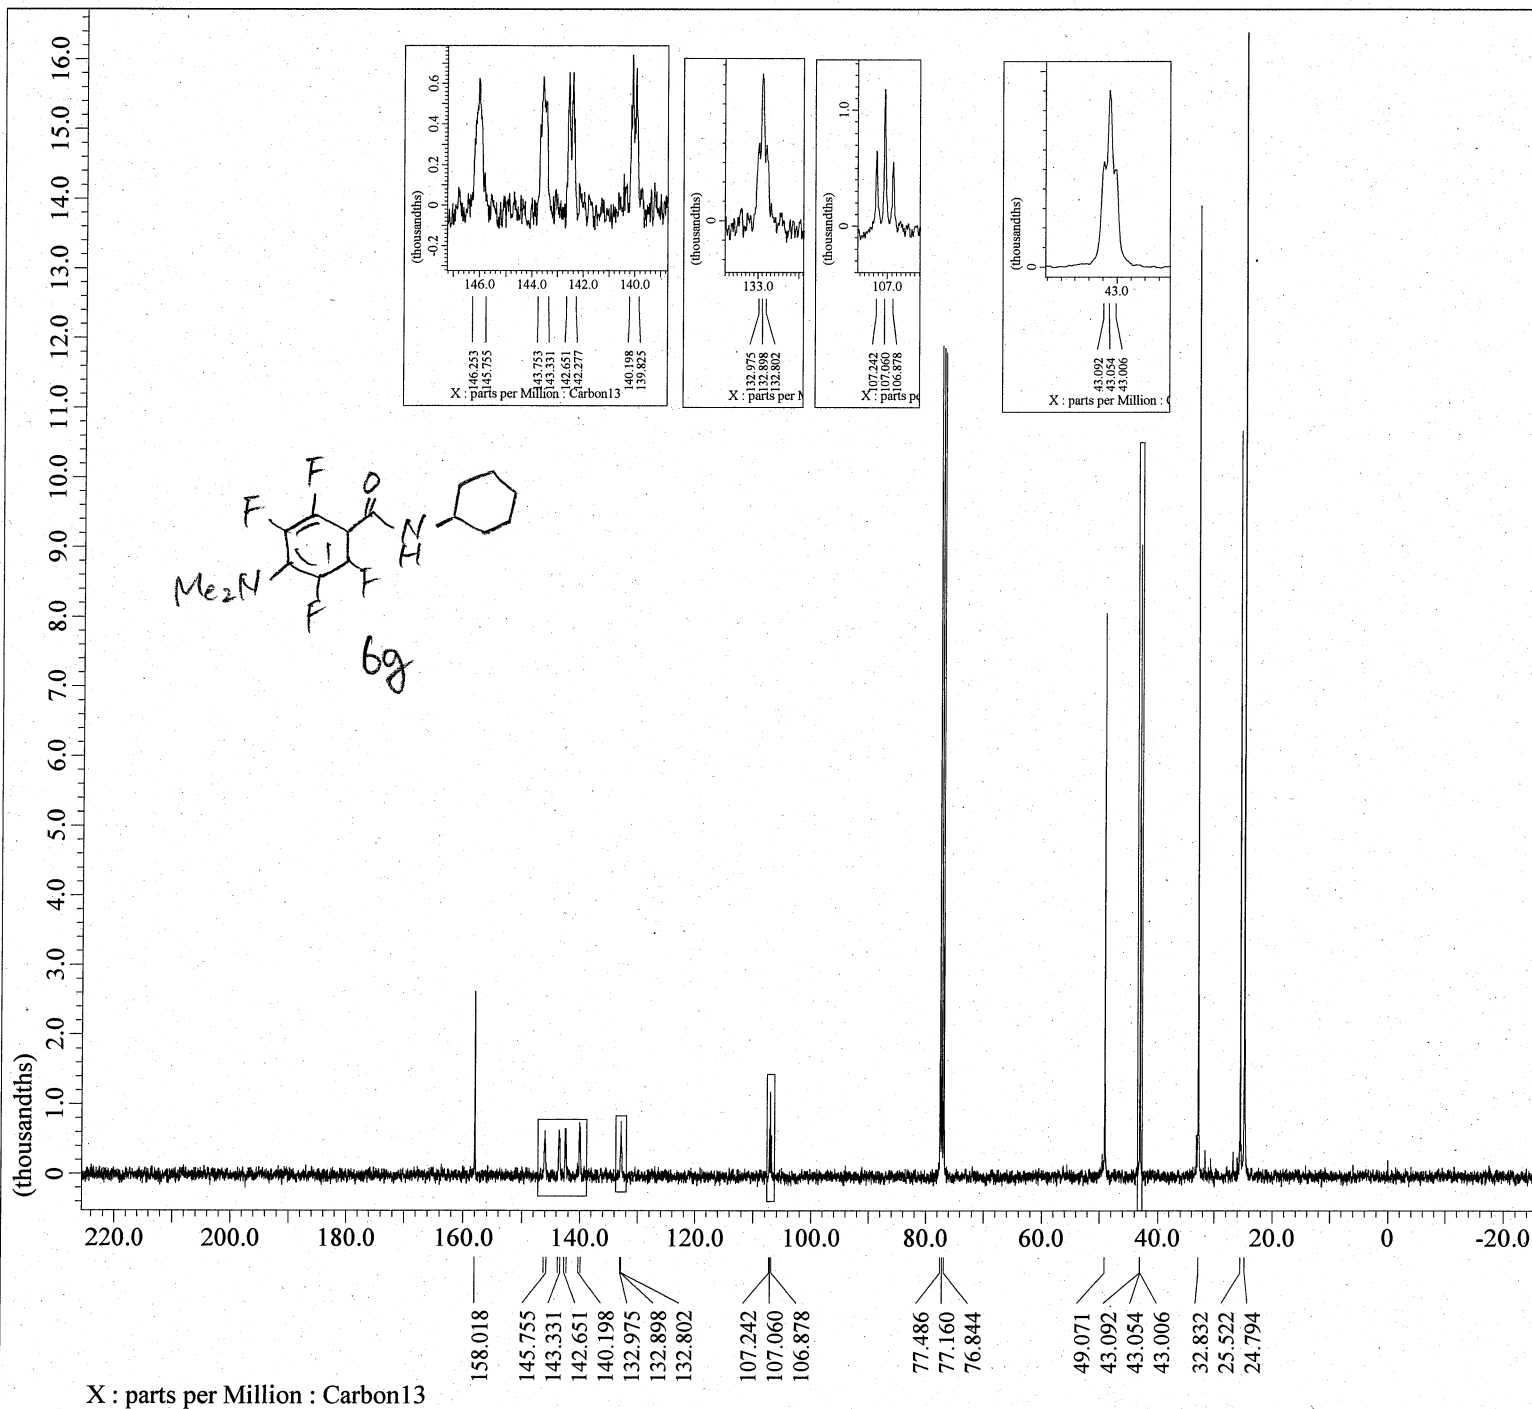

```

---- PROCESSING PARAMETERS ----
sexp( 2.0[Hz], 0.0[s] )
trapezoid( 0[%], 0[%], 80[%], 100[%] )
zerofill( 1 )
fft( 1, TRUE, TRUE )
machinephase
ppm

```

以下に由来: TKH-1559\_carbon-1-1.jdf

```

Filename      = TKH-1559_carbon-1-
Author        = element
Experiment    = carbon.jxp
Sample_Id     = TKH-1559
Solvent       = CHLOROFORM-D
Actual_Start_Time = 9-MAR-2022 16:27:
Revision_Time = 10-MAR-2022 20:21:

```

```

Comment      = single pulse decou
Data Format   = 1D COMPLEX
Dim_Size     = 26214
X_Domain     = Carbon13
Dim_Title    = Carbon13
Dim_Units    = [ppm]
Dimensions   = X
Spectrometer = DELTA2_NMR

```

```

Field_Strength = 9.2982153[T] (400[
X_Acq_Duration = 1.048576[s]
X_Domain       = Carbon13
X_Freq         = 99.54517646[MHz]
X_Offset       = 100[ppm]
X_Points       = 32768
X_Prescans     = 4
X_Resolution   = 0.95367432[Hz]
X_Sweep        = 31.25[kHz]
X_Sweep_Clipped = 25[kHz]
Irr_Domain     = Proton
Irr_Freq       = 395.88430144[MHz]
Irr_Offset     = 5[ppm]
Blanking       = 5[us]
Clipped        = TRUE
Scans          = 400
Total_Scans    = 400

```

```

Relaxation_Delay = 2[s]
Recvr_Gain       = 50
Temp_Get         = 18[dC]
X_90_Width       = 9.65[us]
X_Acq_Time       = 1.048576[s]
X_Angle          = 30[deg]
X_Atn            = 8[dB]
X_Pulse          = 3.21666667[us]
Irr_Atn_Dec      = 25.059[dB]
Irr_Atn_Dec_Calc = 25.059[dB]
Irr_Atn_Dec_Default_Calc = 25.059[dB]
Irr_Atn_Noise    = 25.059[dB]
Irr_Dec_Bandwidth_Hz = 4.7826087[kHz]
Irr_Dec_Bandwidth_Ppm = 12.08082432[ppm]
Irr_Dec_Freq     = 395.88430144[MHz]
Irr_Dec_Merit_Factor = 2.2
Irr_Decoupling   = TRUE
Irr_Noise        = WALTZ
Irr_Offset_Default = 5[ppm]

```

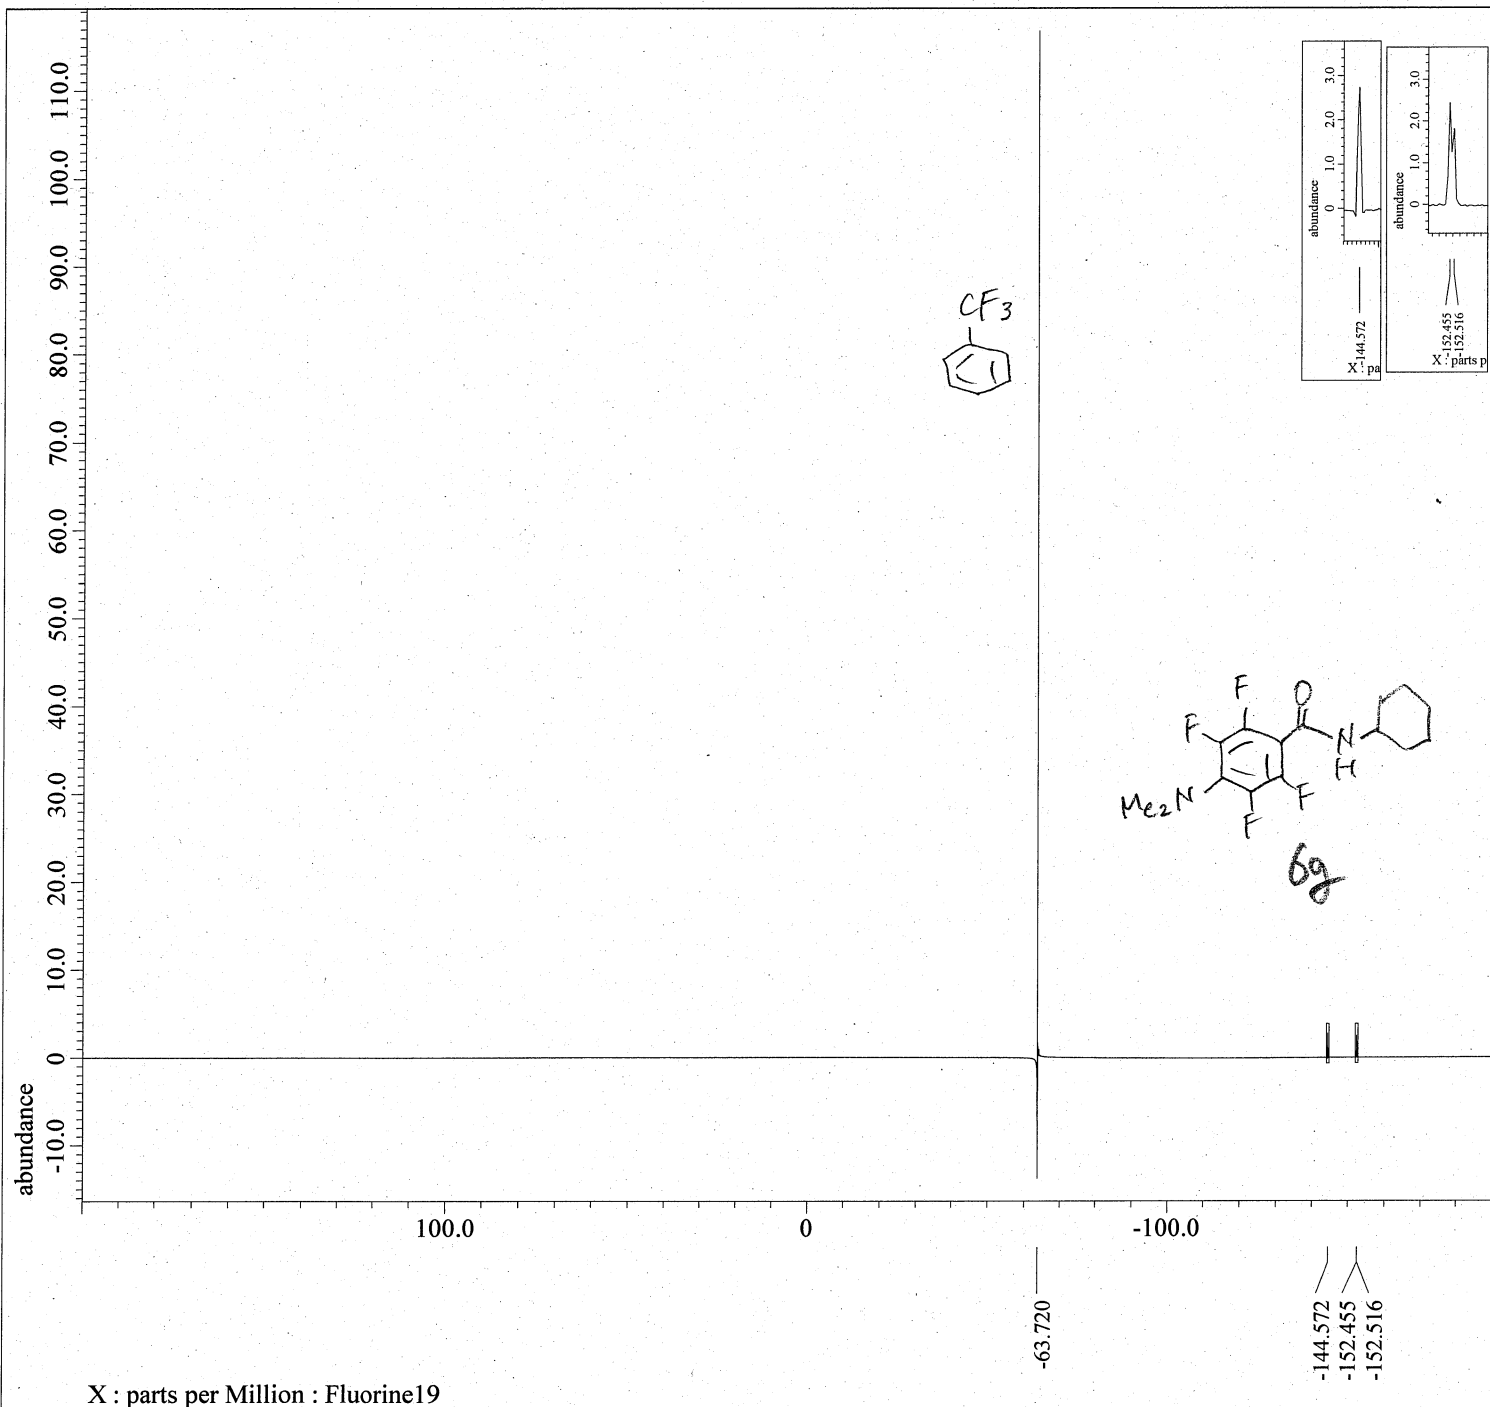

----- PROCESSING PARAMETERS -----

```

dc_balance( 0, FALSE )
sexp( 0.2[Hz], 0.0[s] )
trapezoid( 0[%], 0[%], 80[%], 100[%] )
zerofill( 1 )
fft( 1, TRUE, TRUE )
machinephase
ppm
phase( 50, 0, 50[%] )

```

以下に由来: TKH-1559\_F\_standard\_single\_pulse-1-

```

Filename      = TKH-1559_F_standard_singl
Author        = element
Experiment     = single_pulse.jxp
Sample_Id      = TKH-1559_F_standard
Solvent        = CHLOROFORM-D
Actual_Start_Time = 5-MAR-2022 16:54:24
Revision_Time  = 11-MAR-2022 14:01:15

```

```

Comment       = single_pulse
Data_Format    = 1D COMPLEX
Dim_Size       = 13107
X_Domain       = Fluori
Dim_Title      = Fluorine19
Dim_Units      = [ppm]
Dimensions     = X
Spectrometer   = DELTA2_NMR

```

```

Field_Strength = 9.4073814[T] (400[MHz])
X_Acq_Duration = 86.50752[ms]
X_Domain       = 19F
X_Freq         = 376.87675879[MHz]
X_Offset       = 0[ppm]
X_Points       = 16384
X_Prescans     = 1
X_Resolution   = 11.55968868[Hz]
X_Sweep        = 189.39393939[kHz]
X_Sweep_Clippped = 151.51515152[kHz]
Irr_Domain     = Fluorine19
Irr_Freq       = 376.87675879[MHz]
Irr_Offset     = 5[ppm]
Tri_Domain     = Fluorine19
Tri_Freq       = 376.87675879[MHz]
Tri_Offset     = 5[ppm]
Clipped        = FALSE
Scans          = 8
Total_Scans    = 8

```

```

Relaxation_Delay = 5[s]
Recvr_Gain       = 46
Temp_Get         = 18.9[dC]
X_90_Width       = 6.8[us]
X_Acq_Time       = 86.50752[ms]
X_Angle          = 45[deg]
X_Atn            = 3[dB]
X_Pulse          = 3.4[us]
Irr_Mode         = Off
Tri_Mode         = Off
Dante_Presat     = FALSE
Initial_Wait     = 1[s]
Repetition_Time  = 5.08650752[s]

```

X : parts per Million : Fluorine19

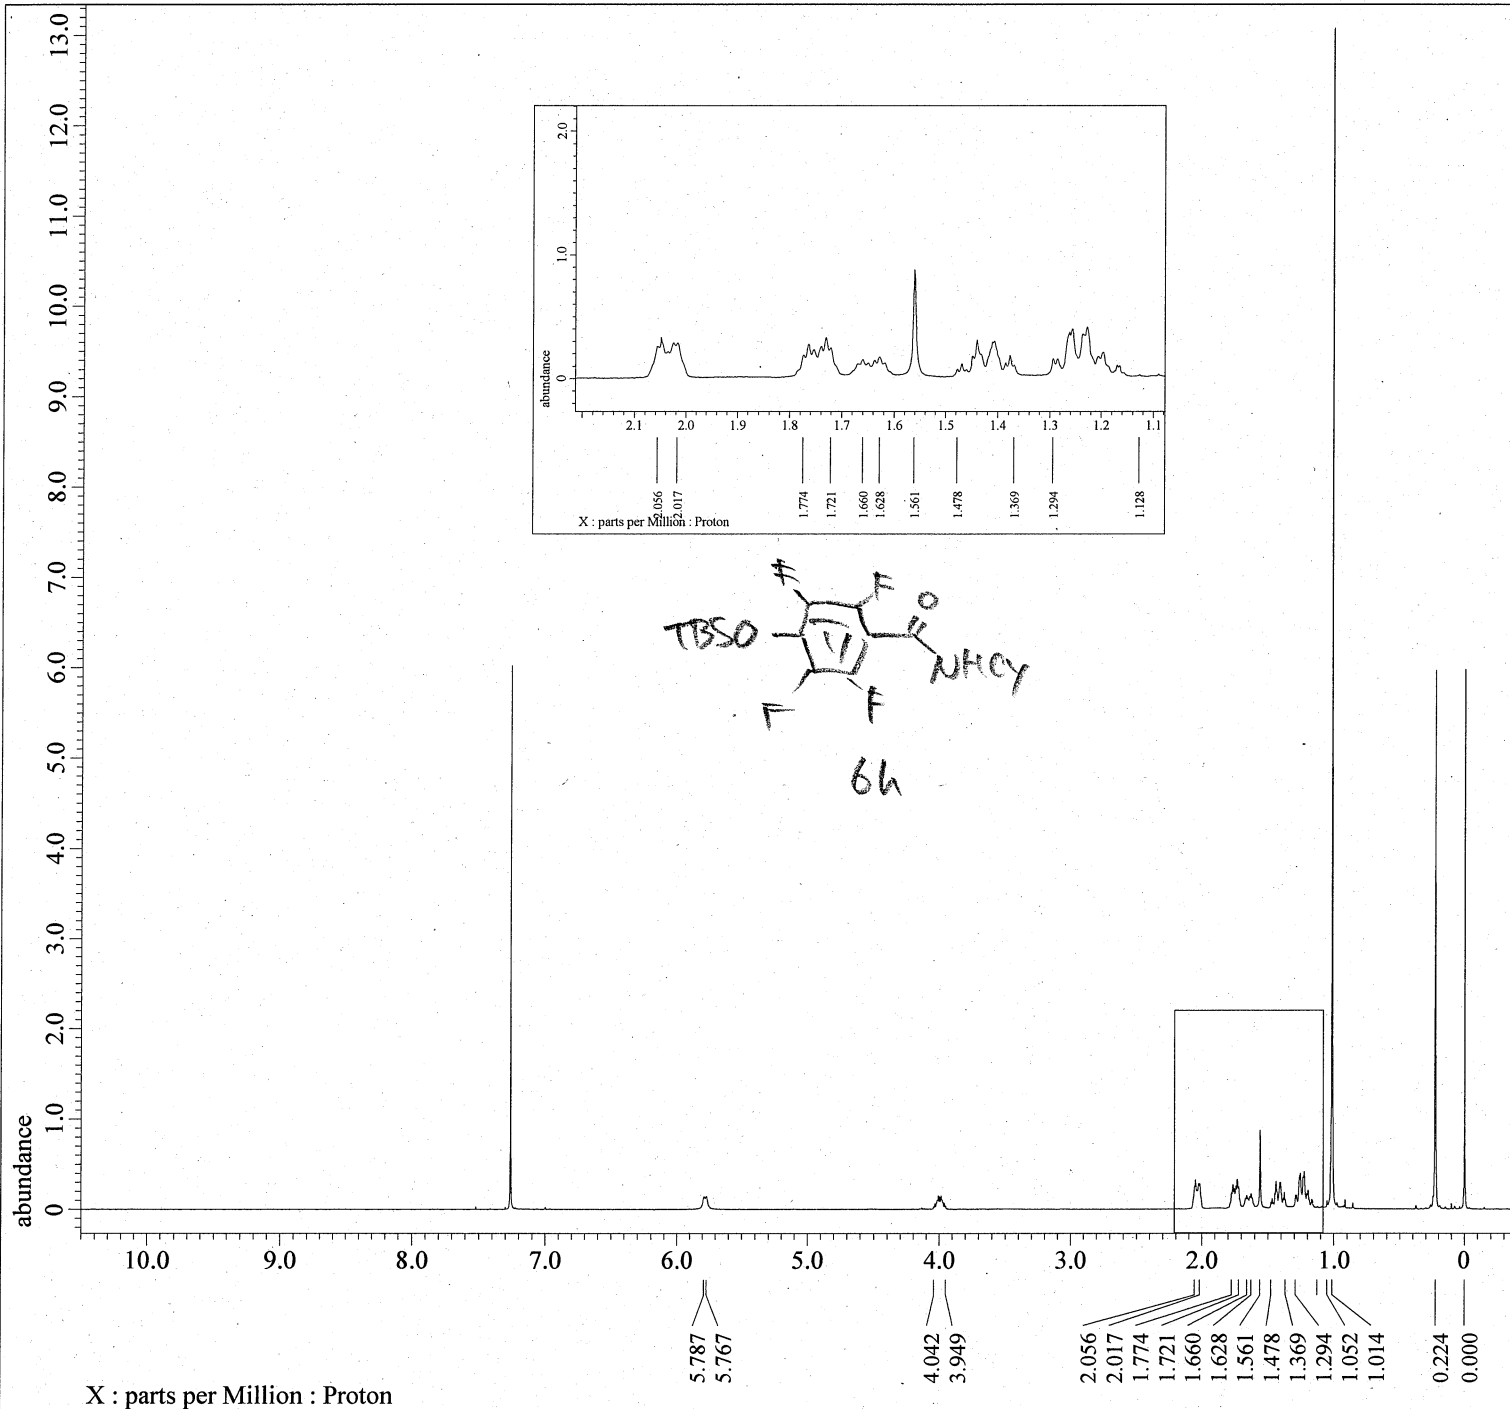

----- PROCESSING PARAMETERS -----

```

dc balance( 0, FALSE )
sexp( 0.2[Hz], 0.0[s] )
trapezoid( 0[%], 0[%], 80[%], 100[%] )
zerofill( 1 )
fft( 1, TRUE, TRUE )
machinephase
ppm

```

Derived from: TKH-1533column11-15\_Proton-1-2.

Filename = TKH-1533column11-15\_Proton-1-2  
Author = element  
Experiment = proton.jxp  
Sample\_Id = TKH-1533column11-15  
Solvent = CHLOROFORM-D  
Actual\_Start\_Time = 14-JAN-2022 11:07:44  
Revision\_Time = 6-SEP-2022 15:02:51

Comment = single pulse  
Data Format = 1D COMPLEX  
Dim\_Size = 13107  
X\_Domain = Proton  
Dim\_Title = Proton  
Dim\_Units = [ppm]  
Dimensions = X  
Spectrometer = DELTA2\_NMR

Field Strength = 9.4073814[T] (400[MHz])  
X\_Acq\_Duration = 2.18103808[s]  
X\_Domain = 1H  
X\_Freq = 400.53219825[MHz]  
X\_Offset = 5[ppm]  
X\_Points = 16384  
X\_Prescans = 1  
X\_Resolution = 0.45849727[Hz]  
X\_Sweep = 7.51201923[kHz]  
X\_Sweep\_Clipped = 6.00961538[kHz]  
Irr\_Domain = Proton  
Irr\_Freq = 400.53219825[MHz]  
Irr\_Offset = 5[ppm]  
Tri\_Domain = Proton  
Tri\_Freq = 400.53219825[MHz]  
Tri\_Offset = 5[ppm]  
Clipped = FALSE  
Scans = 8  
Total\_Scans = 8

Relaxation\_Delay = 5[s]  
Recvr\_Gain = 46  
Temp\_Get = 18.5[dC]  
X\_90\_Width = 6[us]  
X\_Acq\_Time = 2.18103808[s]  
X\_Angle = 45[deg]  
X\_Atn = 0.8[dB]  
X\_Pulse = 3[us]  
Irr\_Mode = Off  
Tri\_Mode = Off  
Dante\_Presat = FALSE  
Initial\_Wait = 1[s]  
Repetition\_Time = 7.18103808[s]

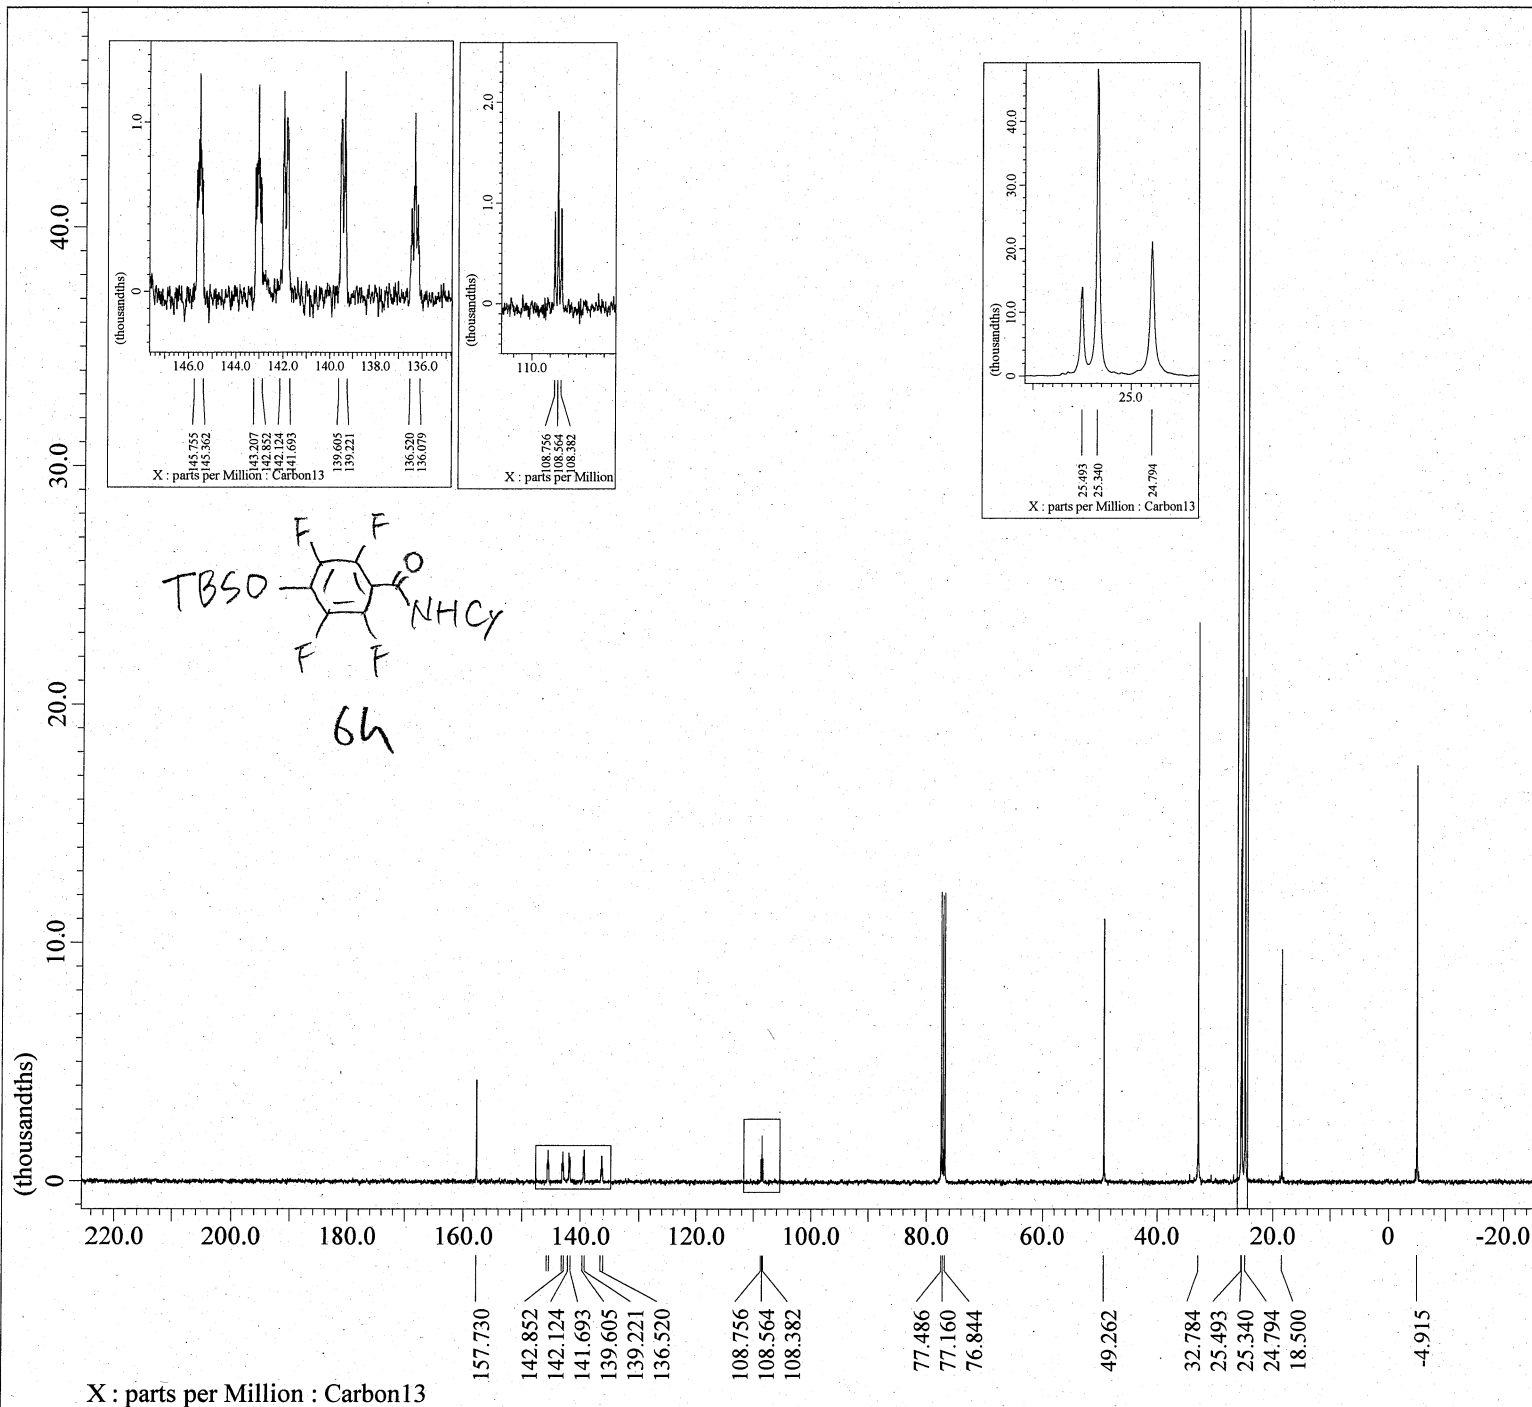

```

---- PROCESSING PARAMETERS ----
sexp( 2.0[Hz], 0.0[s] )
trapezoid( 0[%], 0[%], 80[%], 100[%] )
zerofill( 1 )
fft( 1, TRUE, TRUE )
machinephase
ppm

以下に由来: TKH-1533_carbon-1-1.jdf

Filename      = TKH-1533_carbon-1-
Author        = element
Experiment    = carbon.jxp
Sample_Id     = TKH-1533
Solvent       = CHLOROFORM-D
Actual_Start_Time = 9-MAR-2022 19:31:
Revision_Time  = 10-MAR-2022 20:29:

Comment       = single pulse decou
Data_Format   = 1D_COMPLEX
Dim_Size      = 26214
X_Domain      = Carbon13
Dim_Title     = Carbon13
Dim_Units     = [ppm]
Dimensions    = X
Spectrometer  = DELTA2_NMR

Field_Strength = 9.2982153[T] (400[
X_Acq_Duration = 1.048576[s]
X_Domain       = Carbon13
X_Freq         = 99.54517646[MHz]
X_Offset       = 100[ppm]
X_Points       = 32768
X_Prescans     = 4
X_Resolution   = 0.95367432[Hz]
X_Sweep        = 31.25[kHz]
X_Sweep_Clipped = 25[kHz]
Irr_Domain     = Proton
Irr_Freq       = 395.88430144[MHz]
Irr_Offset     = 5[ppm]
Blanking       = 5[us]
Clipped        = TRUE
Scans          = 400
Total_Scans    = 400

Relaxation_Delay = 2[s]
Recvr_Gain       = 50
Temp_Get         = 18[dC]
X_90_Width       = 9.65[us]
X_Acq_Time       = 1.048576[s]
X_Angle          = 30[deg]
X_Atn            = 8[dB]
X_Pulse          = 3.21666667[us]
Irr_Atn_Dec      = 25.059[dB]
Irr_Atn_Dec_Calc = 25.059[dB]
Irr_Atn_Dec_Default_Calc = 25.059[dB]
Irr_Atn_Noise    = 25.059[dB]
Irr_Dec_Bandwidth_Hz = 4.7826087[kHz]
Irr_Dec_Bandwidth_Ppm = 12.08082432[ppm]
Irr_Dec_Freq     = 395.88430144[MHz]
Irr_Dec_Merit_Factor = 2.2
Irr_Decoupling   = TRUE
Irr_Noise        = TRUE
Irr_Noise        = WALTZ
Irr_Offset_Default = 5[ppm]

```



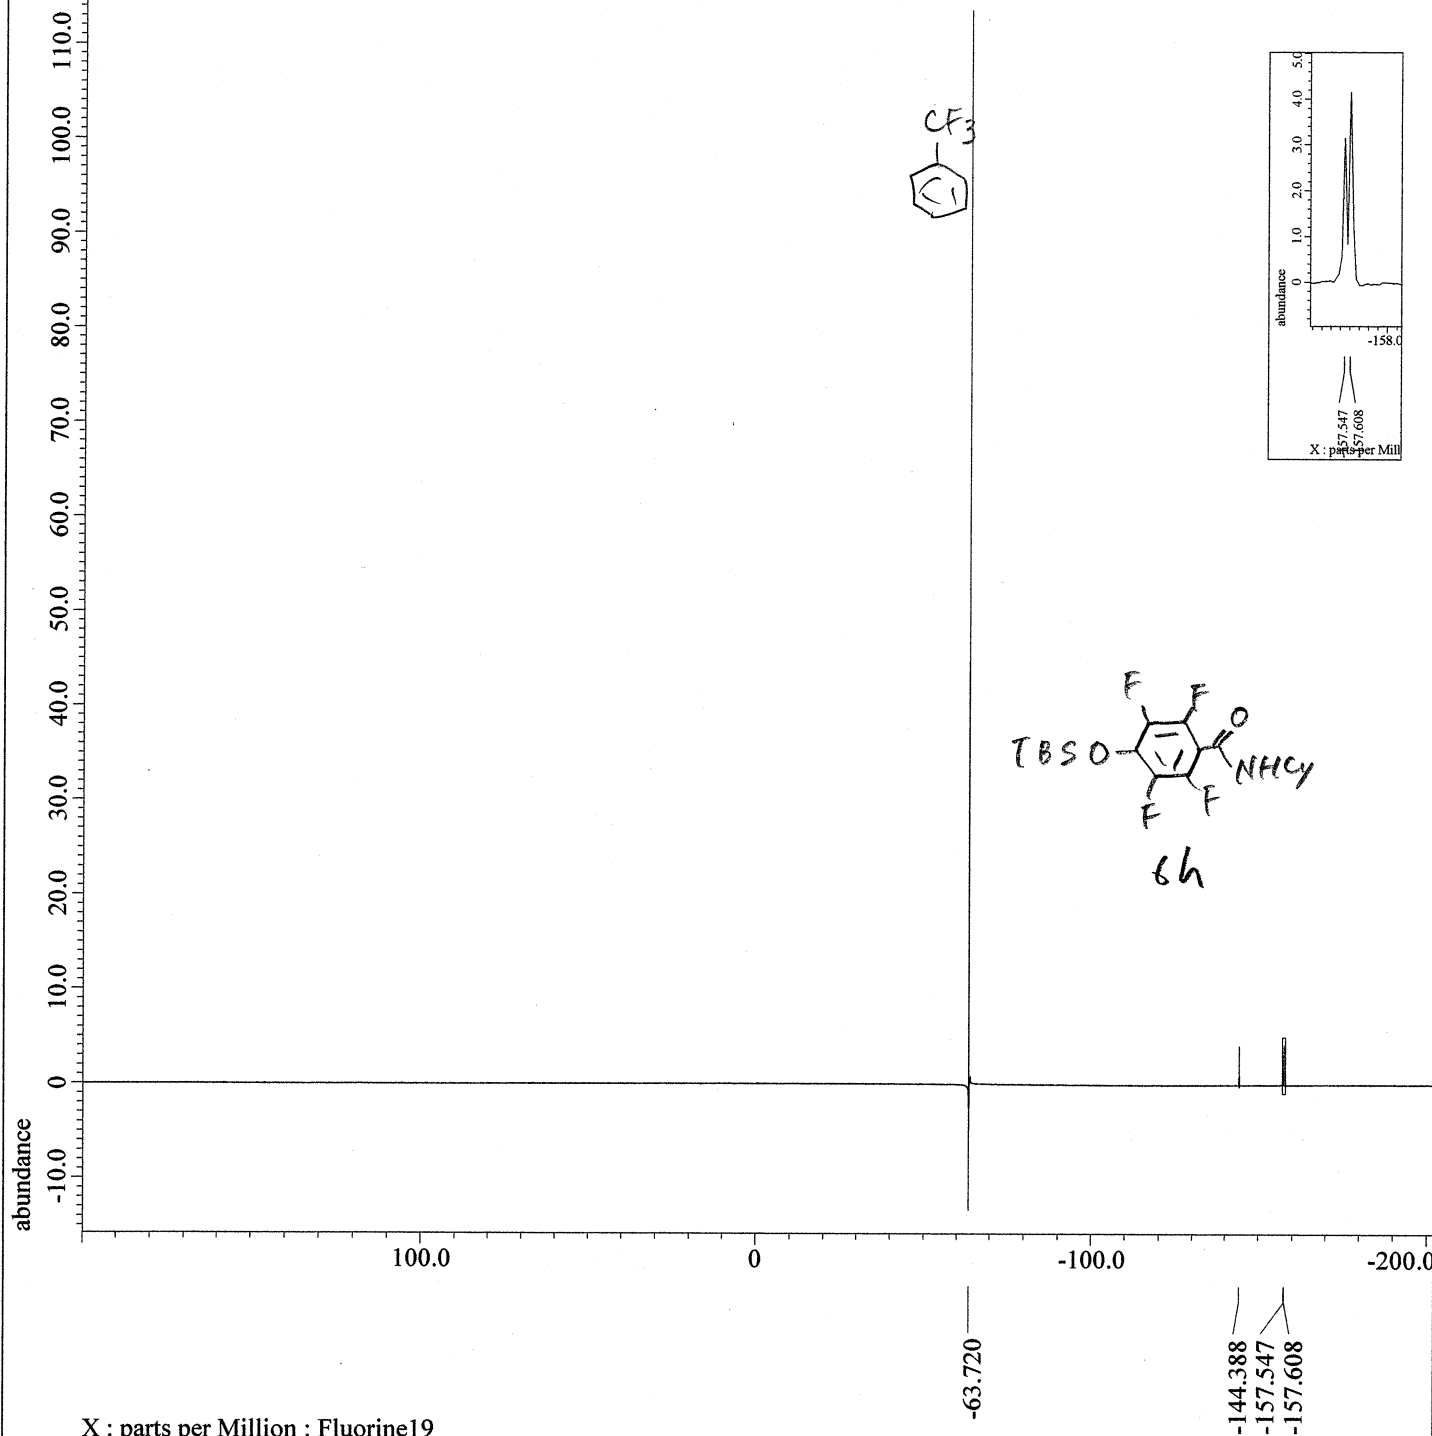

X: parts per Million : Fluorine19

S65

----- PROCESSING PARAMETERS -----  
 dc\_balance( 0, FALSE )  
 sexp( 0.2[Hz], 0.0[s] )  
 trapezoid( 0[%], 0[%], 80[%], 100[%] )  
 zerofill( 1 )  
 fft( 1, TRUE, TRUE )  
 machinephase  
 ppm  
 phase( -73, 0, 50[%] )  
 以下に由来: TKH-1533\_F\_standard\_single\_pulse

Filename = TKH-1533\_F\_standard\_sing  
 Author = element  
 Experiment = single\_pulse.jxp  
 Sample Id = TKH-1533 F\_standard  
 Solvent = CHLOROFORM-D  
 Creation Time = 5-MAR-2022 18:46:58  
 Revision Time = 5-MAR-2022 19:03:14  
 Current Time = 5-MAR-2022 19:03:31

Comment = single pulse  
 Data Format = 1D COMPLEX  
 Dim\_Size = 13107  
 Dim\_Title = Fluorine19  
 Dim\_Units = [ppm]  
 Dimensions = X  
 Spectrometer = DELTA2\_NMR

Field Strength = 9.4073814[T] (400[MHz])  
 X Acq\_Duration = 86.50752[ms]  
 X Domain = 19F  
 X\_Freq = 376.87675879[MHz]  
 X\_Offset = 0[ppm]  
 X Points = 16384  
 X\_Prescans = 1  
 X Resolution = 11.55968868[Hz]  
 X\_Sweep = 189.39393939[kHz]  
 X\_Sweep\_Clipped = 151.51515152[kHz]  
 Irr\_Domain = Fluorine19  
 Irr\_Freq = 376.87675879[MHz]  
 Irr\_Offset = 5[ppm]  
 Tri\_Domain = Fluorine19  
 Tri\_Freq = 376.87675879[MHz]  
 Tri\_Offset = 5[ppm]  
 Clipped = FALSE  
 Scans = 8  
 Total\_Scans = 8

Relaxation\_Delay = 5[s]  
 Recvr\_Gain = 46  
 Temp\_Get = 18.2[dC]  
 X 90\_Width = 6.8[us]  
 X Acq Time = 86.50752[ms]  
 X\_Angle = 45[deg]  
 X\_Atn = 3[dB]  
 X\_Pulse = 3.4[us]  
 Irr\_Mode = Off  
 Tri\_Mode = Off  
 Dante\_Presat = FALSE  
 Initial\_Wait = 1[s]  
 Repetition\_Time = 5.08650752[s]

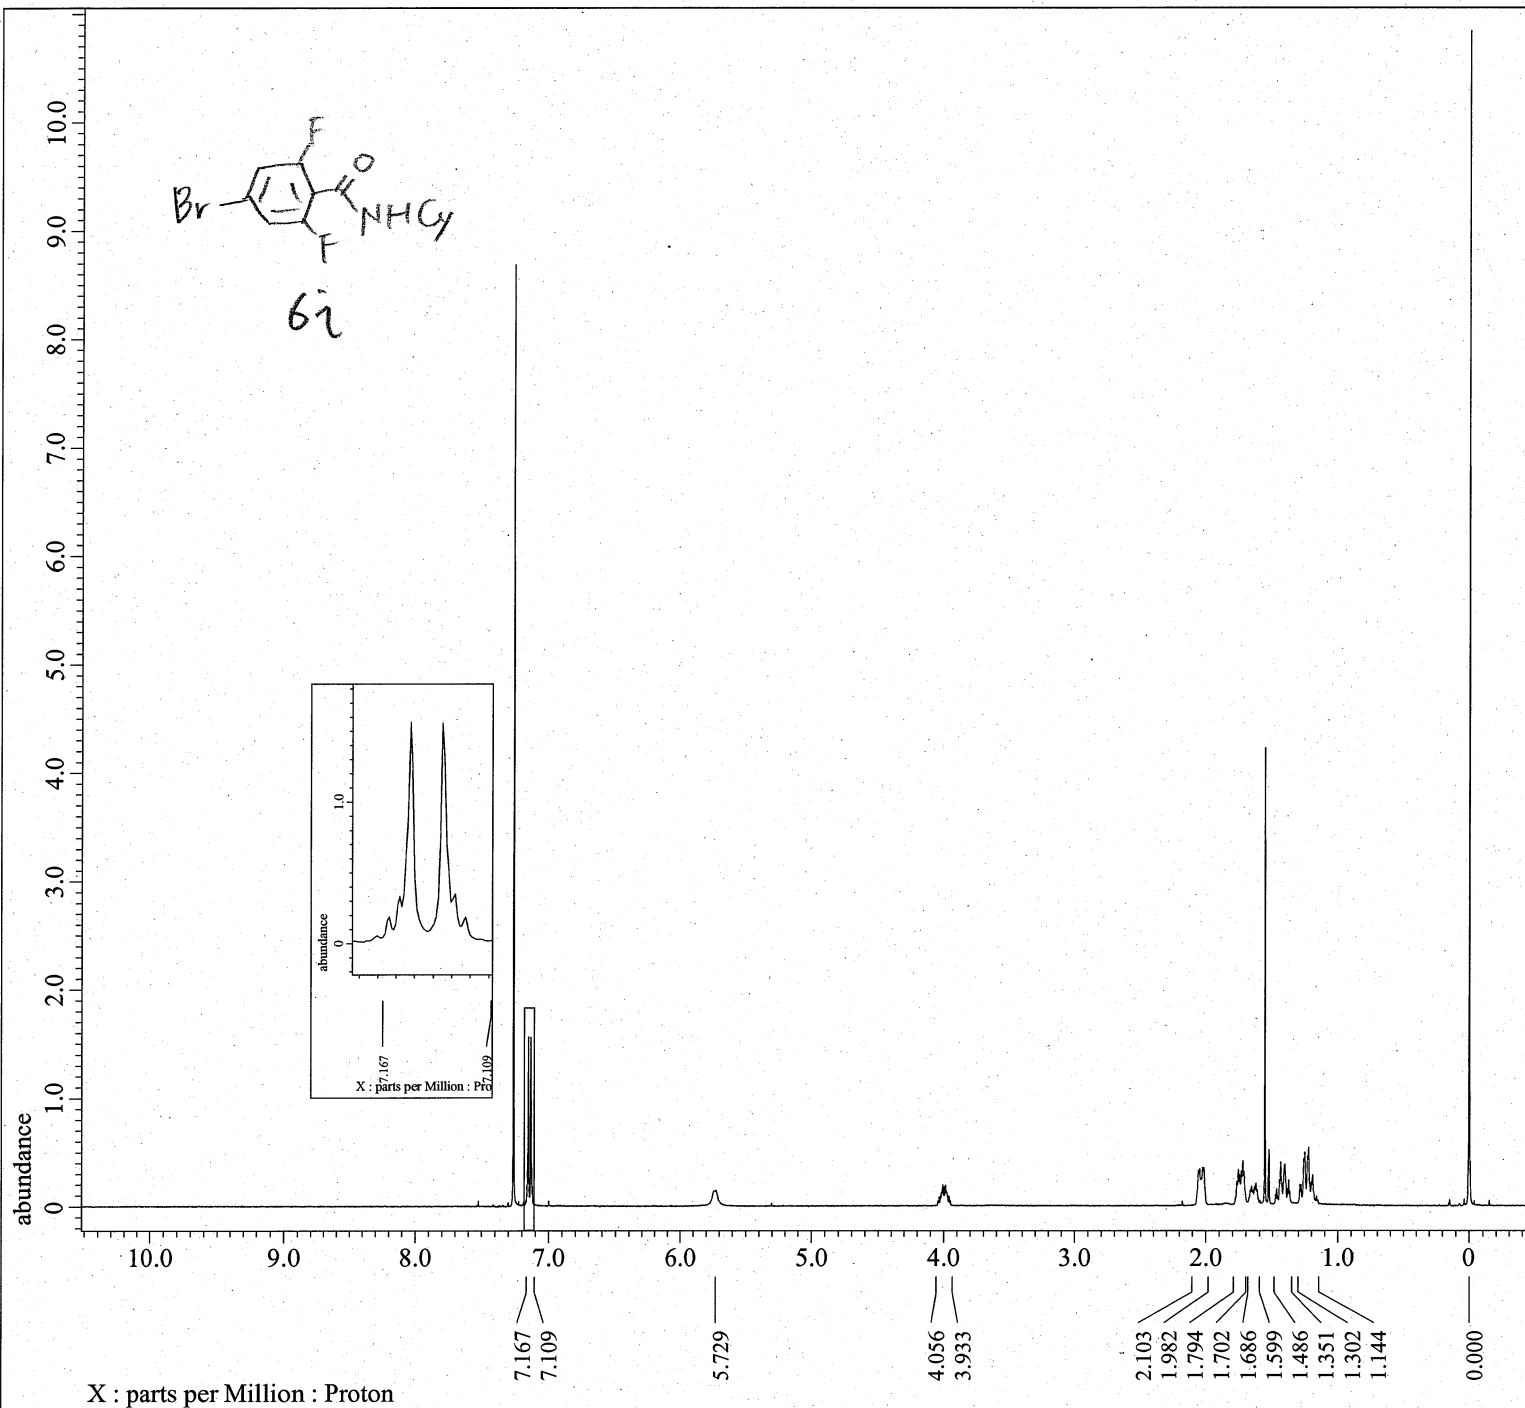

```

---- PROCESSING PARAMETERS ----
dc_balance( 0, FALSE )
sexp( 0.2[Hz], 0.0[s] )
trapezoid( 0[%], 0[%], 80[%], 100[%] )
zerofill( 1 )
fft( 1, TRUE, TRUE )
machinephase
ppm
reference( -0.01845[ppm], 0[ppm] )
phase( 2, 0, 50[%] )

```

以下に由来: TKH-1515\_H\_proton-1-1.jdf

```

Filename      = TKH-1515_H_proton-1-2.jdf
Author        = element
Experiment     = proton.jxp
Sample_Id      = TKH-1515_H
Solvent        = CHLOROFORM-D
Actual_Start_Time = 14-MAR-2022 14:28:39
Revision_Time  = 14-MAR-2022 14:29:39

```

```

Comment       = single_pulse
Data_Format    = 1D COMPLEX
Dim_Size       = 13107
X_Domain       = Proton
Dim_Title      = Proton
Dim_Units      = [ppm]
Dimensions     = X
Spectrometer   = DELTA2_NMR

```

```

Field_Strength = 9.4073814[T] (400[MHz])
X_Acq_Duration = 2.18103808[s]
X_Domain       = 1H
X_Freq         = 400.53219825[MHz]
X_Offset       = 5[ppm]
X_Points       = 16384
X_Prescans     = 1
X_Resolution   = 0.45849727[Hz]
X_Sweep        = 7.51201923[kHz]
X_Sweep_Clipped = 6.00961538[kHz]
Irr_Domain     = Proton
Irr_Freq       = 400.53219825[MHz]
Irr_Offset     = 5[ppm]
Tri_Domain     = Proton
Tri_Freq       = 400.53219825[MHz]
Tri_Offset     = 5[ppm]
Clipped        = FALSE
Scans          = 8
Total_Scans    = 8

```

```

Relaxation_Delay = 5[s]
Recvr_Gain       = 50
Temp_Get         = 18.8[dC]
X_90_Width      = 6[us]
X_Acq_Time       = 2.18103808[s]
X_Angle          = 45[deg]
X_Atn            = 0.8[dB]
X_Pulse         = 3[us]
Irr_Mode         = Off
Tri_Mode         = Off
Dante_Preset     = FALSE
Initial_Wait     = 1[s]
Repetition_Time  = 7.18103808[s]

```

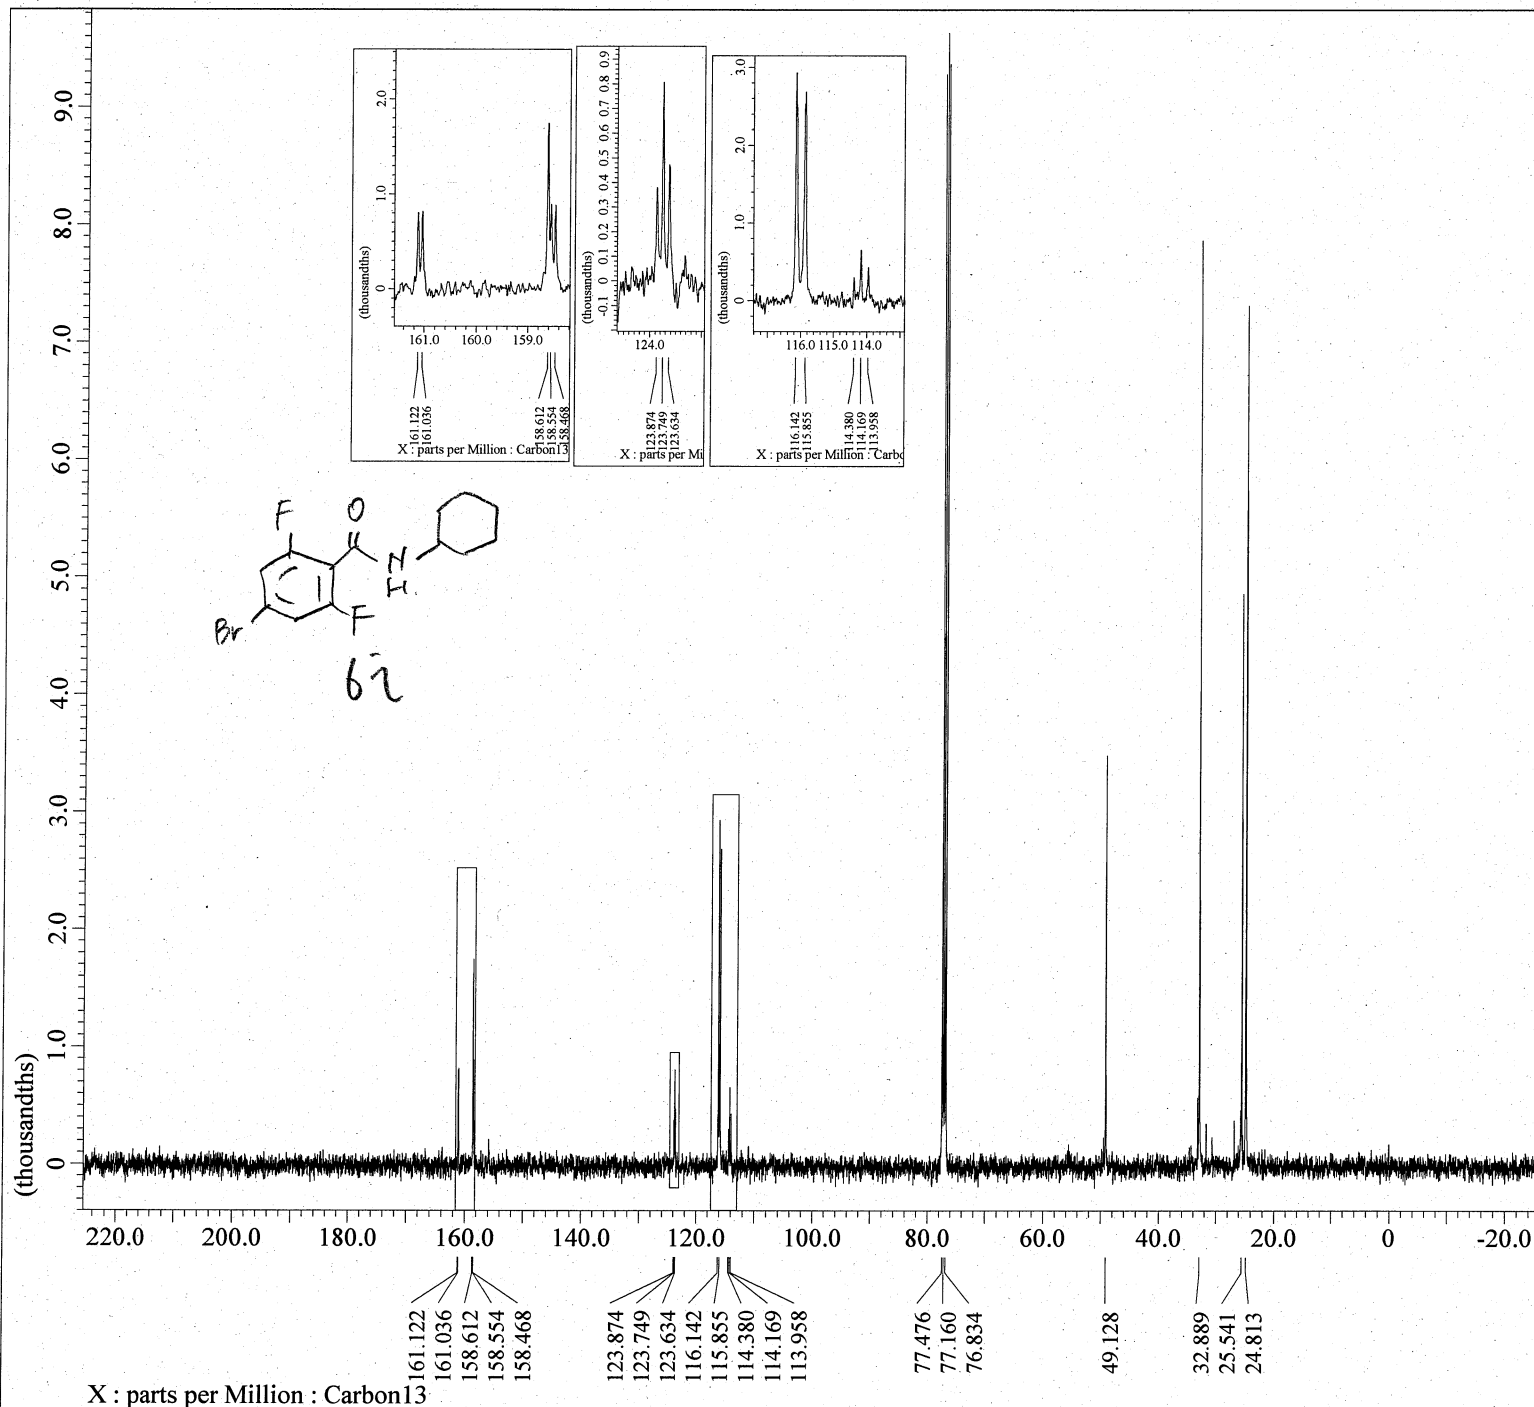

----- PROCESSING PARAMETERS -----  
 sexp( 2.0[Hz], 0.0[s] )  
 trapezoid( 0[%], 0[%], 80[%], 100[%] )  
 zerofill( 1 )  
 fft( 1, TRUE, TRUE )  
 machinphase  
 ppm

以下に由来: TKH-1515\_carbon-1-1.jdf

Filename = TKH-1515\_carbon-1-  
 Author = element  
 Experiment = carbon.jxp  
 Sample\_Id = TKH-1515  
 Solvent = CHLOROFORM-D  
 Actual\_Start\_Time = 9-MAR-2022 20:01:  
 Revision\_Time = 10-MAR-2022 20:36:

Comment = single pulse decou  
 Data Format = 1D COMPLEX  
 Dim\_Size = 26214  
 X\_Domain = Carbon13  
 Dim\_Title = Carbon13  
 Dim\_Units = [ppm]  
 Dimensions = X  
 Spectrometer = DELTA2\_NMR

Field\_Strength = 9.2982153[T] (400[  
 X\_Acq\_Duration = 1.048576[s]  
 X\_Domain = Carbon13  
 X\_Freq = 99.54517646[MHz]  
 X\_Offset = 100[ppm]  
 X\_Points = 32768  
 X\_Prescans = 4  
 X\_Resolution = 0.95367432[Hz]  
 X\_Sweep = 31.25[kHz]  
 X\_Sweep\_Clipped = 25[kHz]  
 Irr\_Domain = Proton  
 Irr\_Freq = 395.88430144[MHz]  
 Irr\_Offset = 5[ppm]  
 Blanking = 5[us]  
 Clipped = TRUE  
 Scans = 400  
 Total\_Scans = 400

Relaxation\_Delay = 2[s]  
 Recvr\_Gain = 50  
 Temp\_Get = 17.9[deg]  
 X\_90\_Width = 9.65[us]  
 X\_Acq\_Time = 1.048576[s]  
 X\_Angle = 30[deg]  
 X\_Atn = 8[dB]  
 X\_Pulse = 3.21666667[us]  
 Irr\_Atn\_Dec = 25.059[dB]  
 Irr\_Atn\_Dec\_Calc = 25.059[dB]  
 Irr\_Atn\_Dec\_Default\_Calc = 25.059[dB]  
 Irr\_Atn\_No = 25.059[dB]  
 Irr\_Dec\_Bandwidth\_Hz = 4.7826087[kHz]  
 Irr\_Dec\_Bandwidth\_Ppm = 12.08082432[ppm]  
 Irr\_Dec\_Freq = 395.88430144[MHz]  
 Irr\_Dec\_Merit\_Factor = 2.2  
 Irr\_Decoupling = TRUE  
 Irr\_No = TRUE  
 Irr\_Noise = WALTZ  
 Irr\_Offset\_Default = 5[ppm]

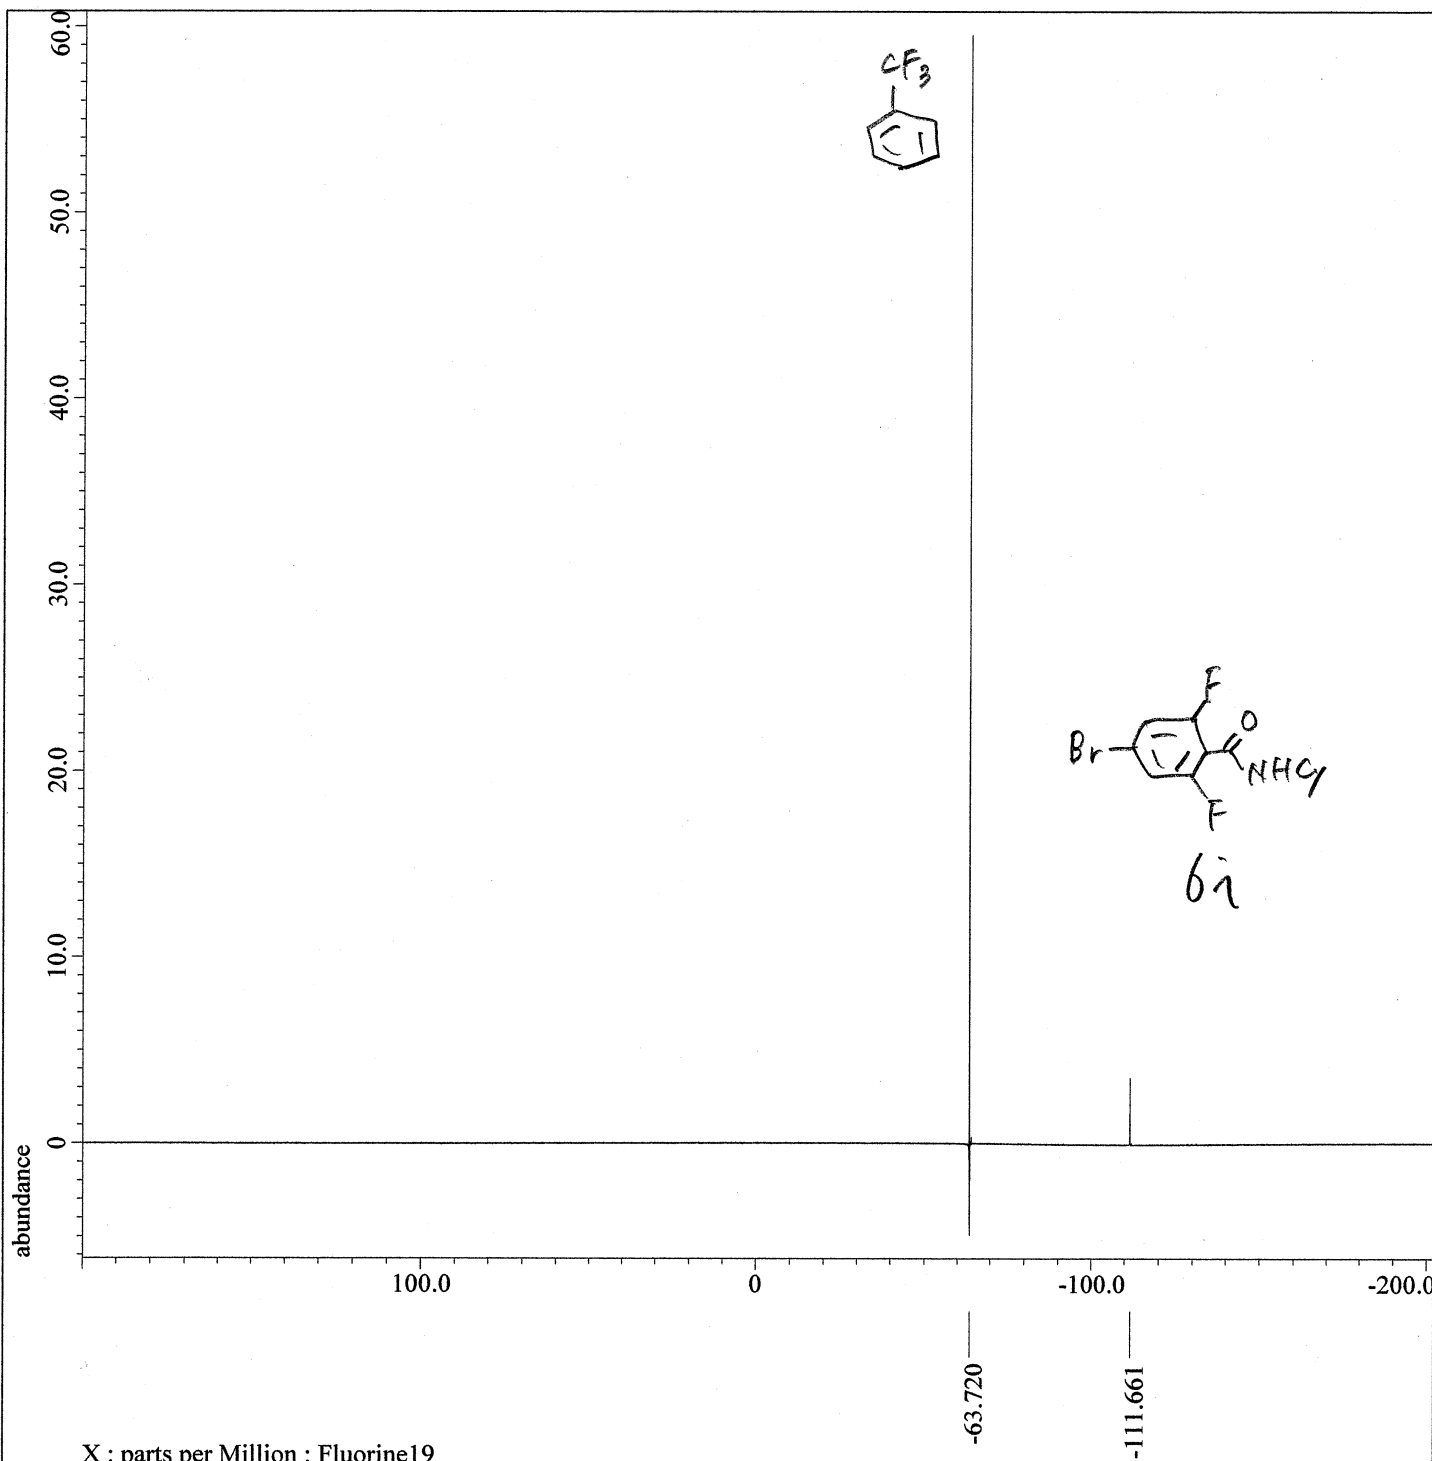

----- PROCESSING PARAMETERS -----  
 dc\_balance( 0, FALSE )  
 sexp( 0.2[Hz], 0.0[s] )  
 trapezoid( 0[%], 0[%], 80[%], 100[%] )  
 zerofill( 1 )  
 fft( 1, TRUE, TRUE )  
 machinephase  
 ppm  
 phase( 75, 0, 50[%] )  
 以下に由来: TKH-1515\_F\_standard\_single\_pulse

Filename = TKH-1515\_F\_standard\_sing  
 Author = element  
 Experiment = single\_pulse.jxp  
 Sample Id = TKH-1515 F standard  
 Solvent = CHLOROFORM-D  
 Creation Time = 5-MAR-2022 16:46:49  
 Revision Time = 5-MAR-2022 19:05:28  
 Current Time = 5-MAR-2022 19:05:32

Comment = single pulse  
 Data Format = 1D COMPLEX  
 Dim Size = 13107  
 Dim Title = Fluorine19  
 Dim Units = [ppm]  
 Dimensions = X  
 Spectrometer = DELTA2\_NMR

Field Strength = 9.4073814[T] (400[MHz])  
 X\_Acq\_Duration = 86.50752[ms]  
 X\_Domain = 19F  
 X\_Freq = 376.87675879[MHz]  
 X\_Offset = 0[ppm]  
 X Points = 16384  
 X\_Prescans = 1  
 X\_Resolution = 11.55968868[Hz]  
 X\_Sweep = 189.39393939[kHz]  
 X\_Sweep\_Clipped = 151.51515152[kHz]  
 Irr\_Domain = Fluorine19  
 Irr\_Freq = 376.87675879[MHz]  
 Irr\_Offset = 5[ppm]  
 Tri\_Domain = Fluorine19  
 Tri\_Freq = 376.87675879[MHz]  
 Tri\_Offset = 5[ppm]  
 Clipped = FALSE  
 Scans = 8  
 Total\_Scans = 8

Relaxation\_Delay = 5[s]  
 Recvr\_Gain = 44  
 Temp\_Get = 18.7[dC]  
 X\_90\_Width = 6.8[us]  
 X\_Acq\_Time = 86.50752[ms]  
 X\_Angle = 45[deg]  
 X\_Atn = 3[dB]  
 X\_Pulse = 3.4[us]  
 Irr\_Mode = Off  
 Tri\_Mode = Off  
 Dante\_Presat = FALSE  
 Initial\_Wait = 1[s]  
 Repetition\_Time = 5.08650752[s]

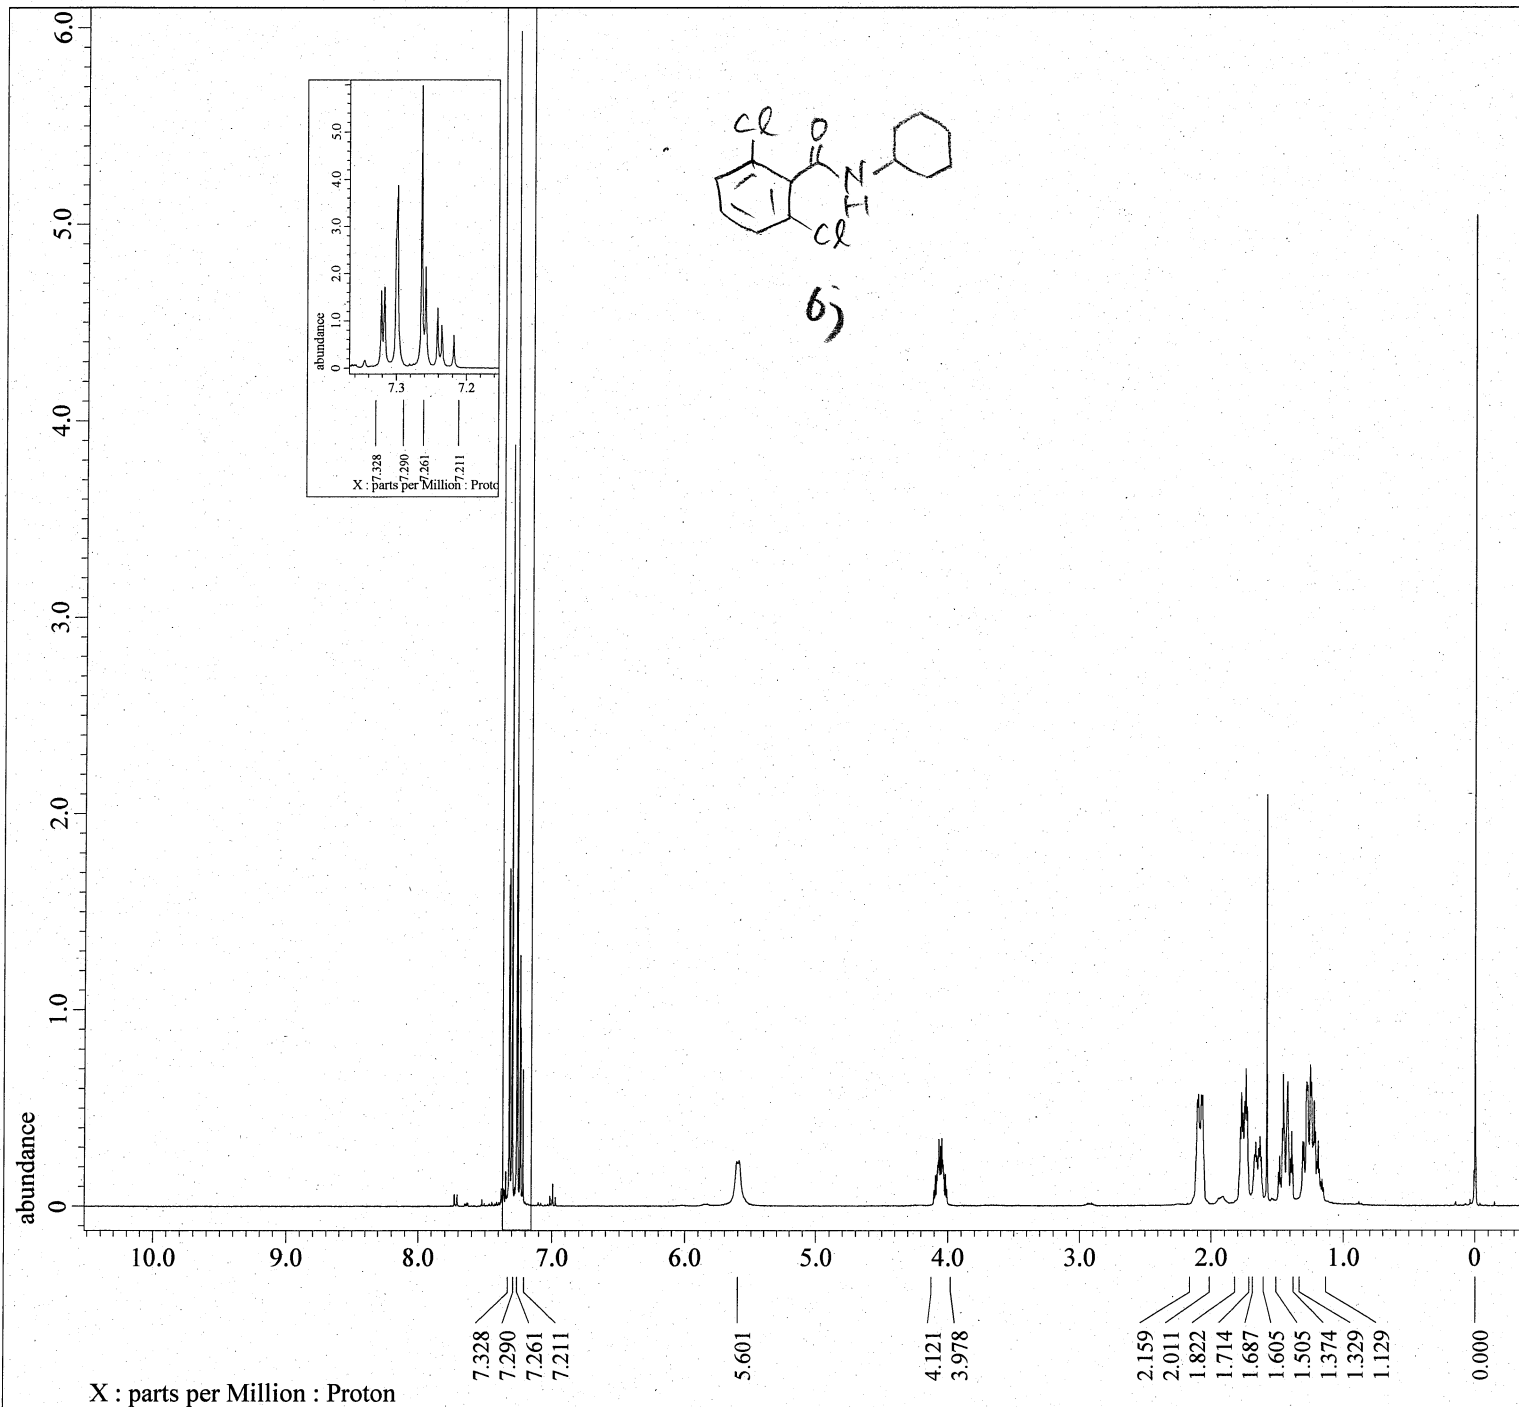

```

---- PROCESSING PARAMETERS ----
dc_balance( 0, FALSE )
sexp( 0.2[Hz], 0.0[s] )
trapezoid( 0[%], 0[%], 80[%], 100[%] )
zerofill( 1 )
fft( 1, TRUE, TRUE )
machinephase
ppm

```

以下に由来:: TKH-1532column\_Proton-1-1.jdf

```

Filename      = TKH-1532column_Proton-1-2
Author       = element
Experiment    = proton.jxp
Sample_Id     = TKH-1532column
Solvent       = CHLOROFORM-D
Actual_Start_Time = 11-JAN-2022 20:26:52
Revision_Time  = 11-MAR-2022 13:06:31

```

```

Comment       = single pulse
Data Format    = 1D COMPLEX
Dim_Size      = 13107
X_Domain      = Proton
Dim_Title     = Proton
Dim_Units     = [ppm]
Dimensions    = X
Spectrometer  = DELTA2_NMR

```

```

Field Strength = 9.4073814[T] (400[MHz])
X_Acq_Duration = 2.18103808[s]
X_Domain       = 1H
X_Freq         = 400.53219825[MHz]
X_Offset       = 5[ppm]
X_Points       = 16384
X_Prescans     = 1
X_Resolution   = 0.45849727[Hz]
X_Sweep        = 7.51201923[kHz]
X_Sweep_Clippped = 6.00961538[kHz]
Irr_Domain     = Proton
Irr_Freq       = 400.53219825[MHz]
Irr_Offset     = 5[ppm]
Tri_Domain     = Proton
Tri_Freq       = 400.53219825[MHz]
Tri_Offset     = 5[ppm]
Clipped        = FALSE
Scans          = 8
Total_Scans    = 8

```

```

Relaxation_Delay = 5[s]
Recvr_Gain       = 48
Temp_Get        = 18.3[dC]
X_90_Width      = 6[us]
X_Acq_Time      = 2.18103808[s]
X_Angle         = 45[deg]
X_Atn           = 0.8[dB]
X_Pulse         = 3[us]
Irr_Mode        = Off
Tri_Mode        = Off
Dante_Presat    = FALSE
Initial_Wait    = 1[s]
Repetition_Time = 7.18103808[s]

```

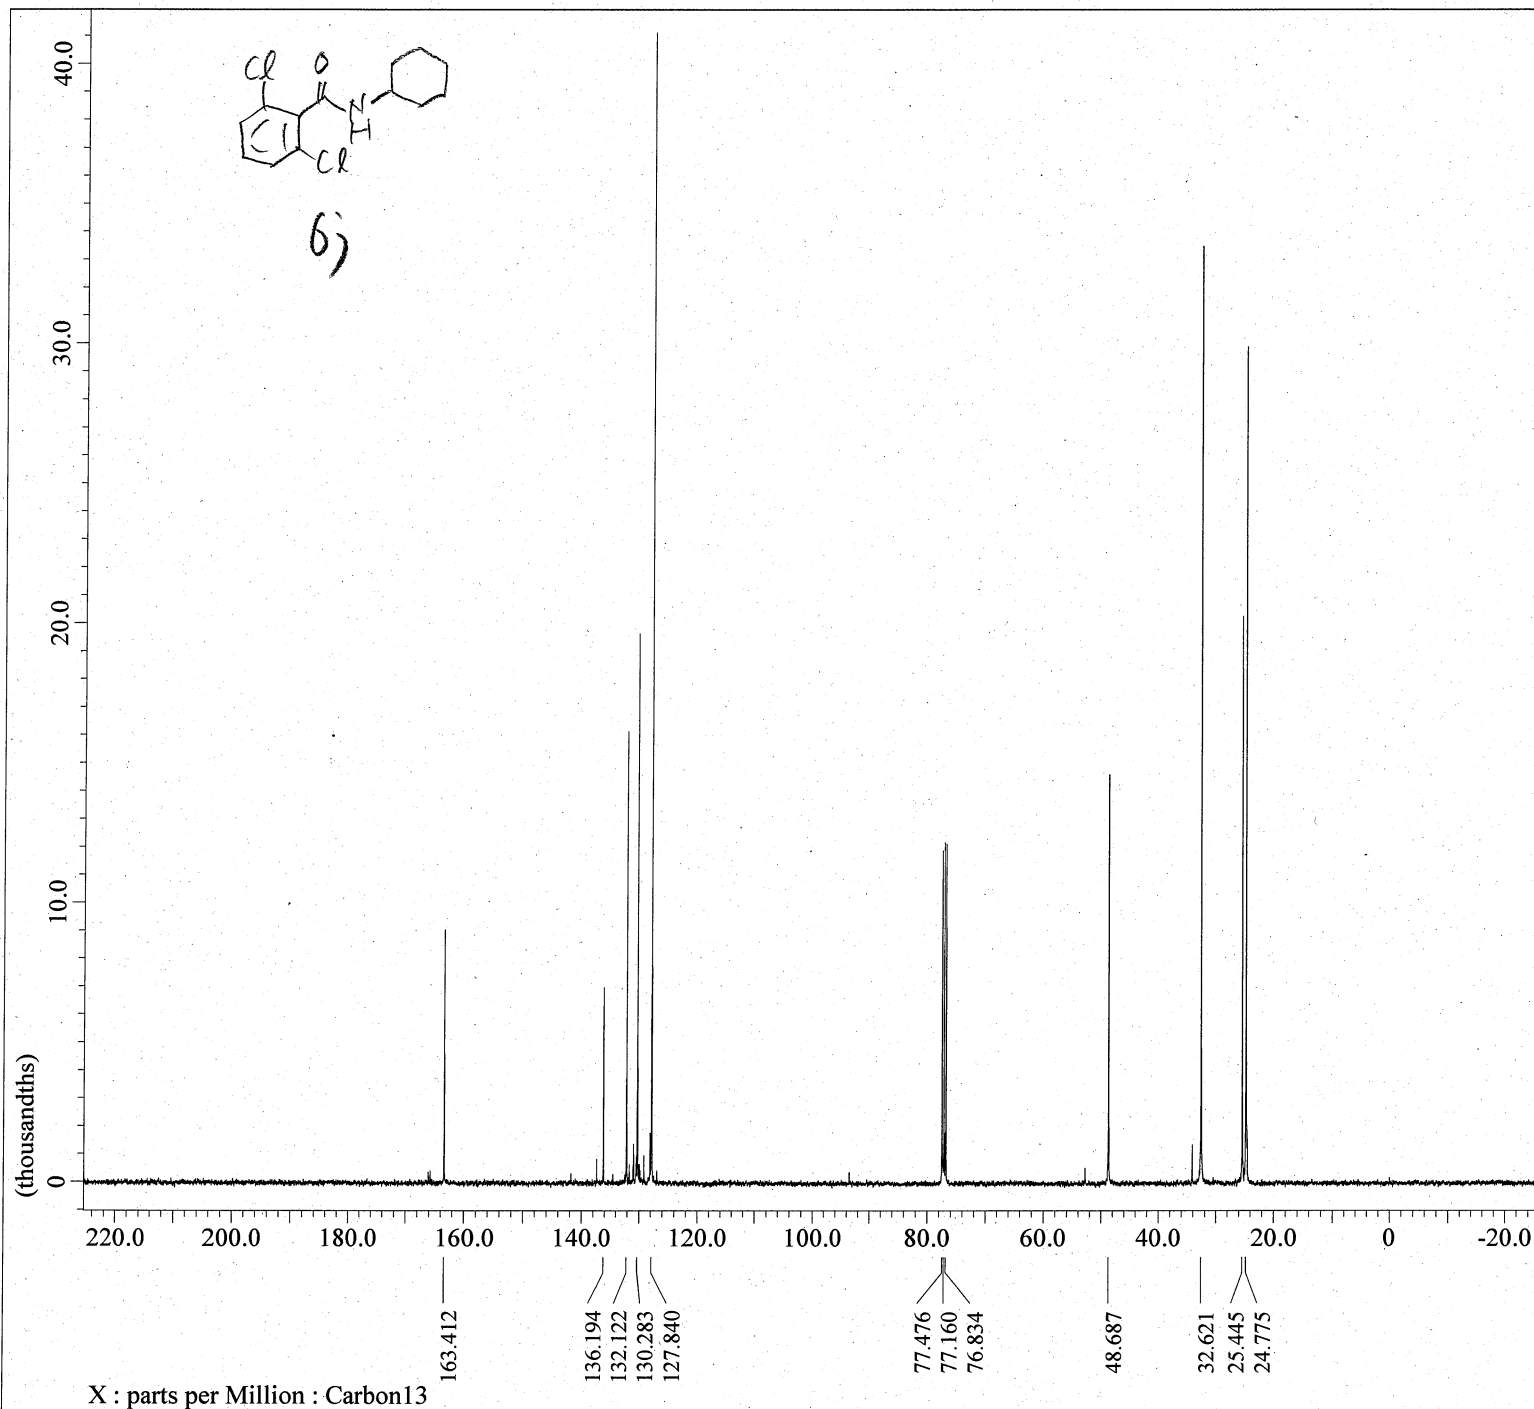

```

---- PROCESSING PARAMETERS ----
sexp( 2.0[Hz], 0.0[s] )
trapezoid( 0[%], 0[%], 80[%], 100[%] )
zerofill( 1 )
fft( 1, TRUE, TRUE )
machinphase
ppm

以下に由来: TKH-1532_carbon-1-1.jdf

Filename           = TKH-1532_carbon-1-
Author             = element
Experiment         = carbon.jxp
Sample_Id         = TKH-1532
Solvent            = CHLOROFORM-D
Actual_Start_Time  = 9-MAR-2022 20:29:
Revision_Time      = 10-MAR-2022 20:44:

Comment           = single pulse decou
Data Format        = 1D COMPLEX
Dim_Size          = 26214
X_Domain          = Carbon13
Dim_Title         = Carbon13
Dim_Units         = [ppm]
Dimensions        = X
Spectrometer      = DELTA2_NMR

Field_Strength    = 9.2982153[T] (400[
X_Acq_Duration    = 1.048576[s]
X_Domain          = Carbon13
X_Freq            = 99.54517646[MHz]
X_Offset          = 100[ppm]
X_Points          = 32768
X_Prescans        = 4
X_Resolution      = 0.95367432[Hz]
X_Sweep           = 31.25[kHz]
X_Sweep_Clipped   = 25[kHz]
Irr_Domain        = Proton
Irr_Freq          = 395.88430144[MHz]
Irr_Offset        = 5[ppm]
Blanking          = 5[us]
Clipped           = TRUE
Scans             = 400
Total_Scans       = 400

Relaxation_Delay   = 2[s]
Recvr_Gain         = 50
Temp_Get           = 17.9[dC]
X_90_Width        = 9.65[us]
X_Acq_Time         = 1.048576[s]
X_Angle           = 30[deg]
X_Atn             = 8[dB]
X_Pulse           = 3.21666667[us]
Irr_Atn_Dec        = 25.059[dB]
Irr_Atn_Dec_Calc  = 25.059[dB]
Irr_Atn_Dec_Default_Calc = 25.059[dB]
Irr_Atn_Noise     = 25.059[dB]
Irr_Dec_Bandwidth_Hz = 4.7826087[kHz]
Irr_Dec_Bandwidth_Ppm = 12.08082432[ppm]
Irr_Dec_Freq      = 395.88430144[MHz]
Irr_Dec_Merit_Factor = 2.2
Irr_Decoupling     = TRUE
Irr_Noise         = WALTZ
Irr_Offset_Default = 5[ppm]

```

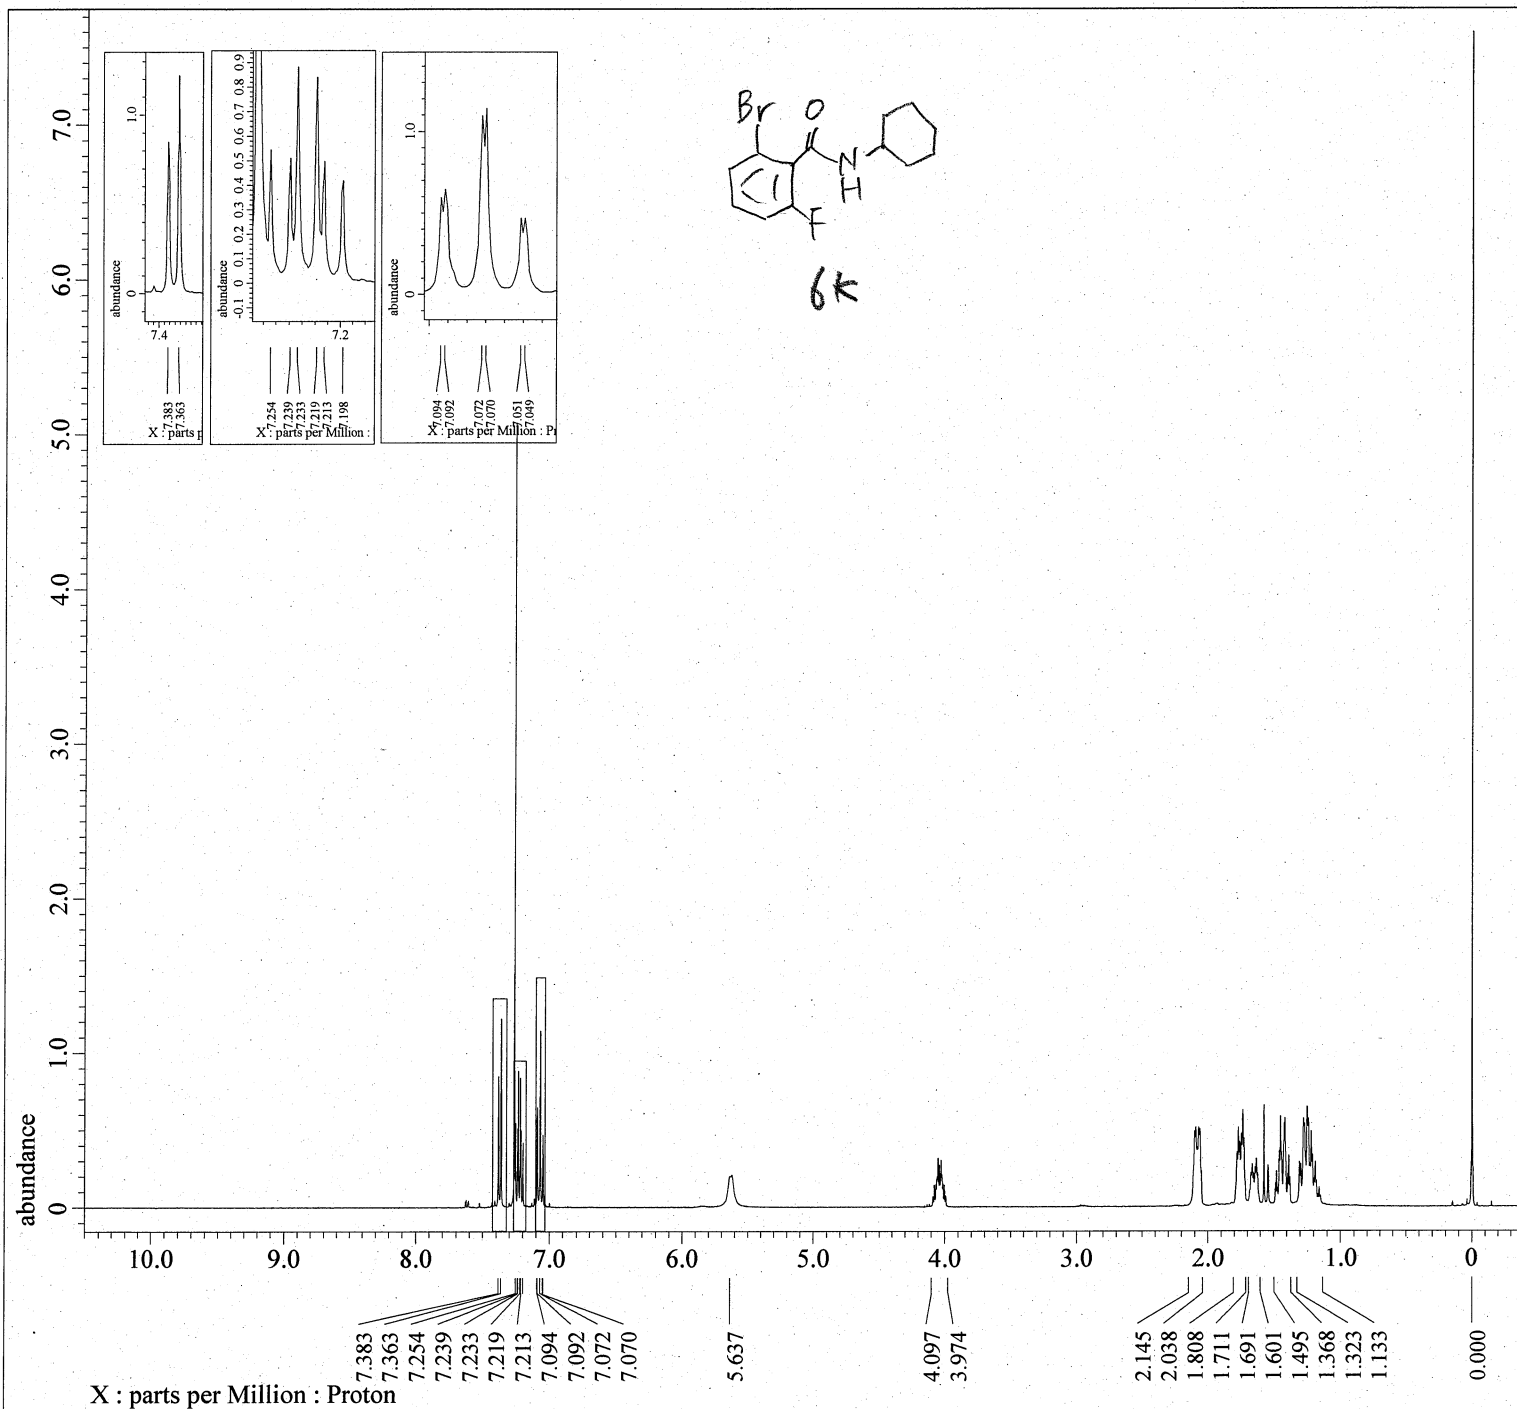

```

---- PROCESSING PARAMETERS ----
dc_balance( 0, FALSE )
sexp( 0.2[Hz], 0.0[s] )
trapezoid( 0[%], 0[%], 80[%], 100[%] )
zerofill( 1 )
fft( 1, TRUE, TRUE )
machinephase
ppm

```

以下に由来:: TKH-1549column\_Proton-1-1.jdf

```

Filename      = TKH-1549column_Proton-1-2
Author       = element
Experiment    = proton.jxp
Sample_Id     = TKH-1549column
Solvent       = CHLOROFORM-D
Actual_Start_Time = 2-FEB-2022 19:40:07
Revision_Time = 11-MAR-2022 13:11:45

```

```

Comment       = single_pulse
Data Format    = 1D COMPLEX
Dim_Size      = 13107
X_Domain      = Proton
Dim_Title     = Proton
Dim_Units     = [ppm]
Dimensions    = X
Spectrometer  = DELTA2_NMR

```

```

Field Strength = 9.4073814[T] (400[MHz])
X_Acq_Duration = 2.18103808[s]
X_Domain      = 1H
X_Freq        = 400.53219825[MHz]
X_Offset      = 5[ppm]
X_Points      = 16384
X_Prescans    = 1
X_Resolution  = 0.45849727[Hz]
X_Sweep       = 7.51201923[kHz]
X_Sweep_Clippped = 6.00961538[kHz]
Irr_Domain    = Proton
Irr_Freq      = 400.53219825[MHz]
Irr_Offset    = 5[ppm]
Tri_Domain    = Proton
Tri_Freq      = 400.53219825[MHz]
Tri_Offset    = 5[ppm]
Clipped       = FALSE
Scans         = 8
Total_Scans   = 8

```

```

Relaxation_Delay = 5[s]
Recvr_Gain       = 46
Temp_Get        = 17.9[dC]
X_90_Width      = 6[us]
X_Acq_Time      = 2.18103808[s]
X_Angle         = 45[deg]
X_Atn           = 0.8[dB]
X_Pulse         = 3[us]
Irr_Mode        = Off
Tri_Mode        = Off
Dante_Presat    = FALSE
Initial_Wait    = 1[s]
Repetition_Time = 7.18103808[s]

```

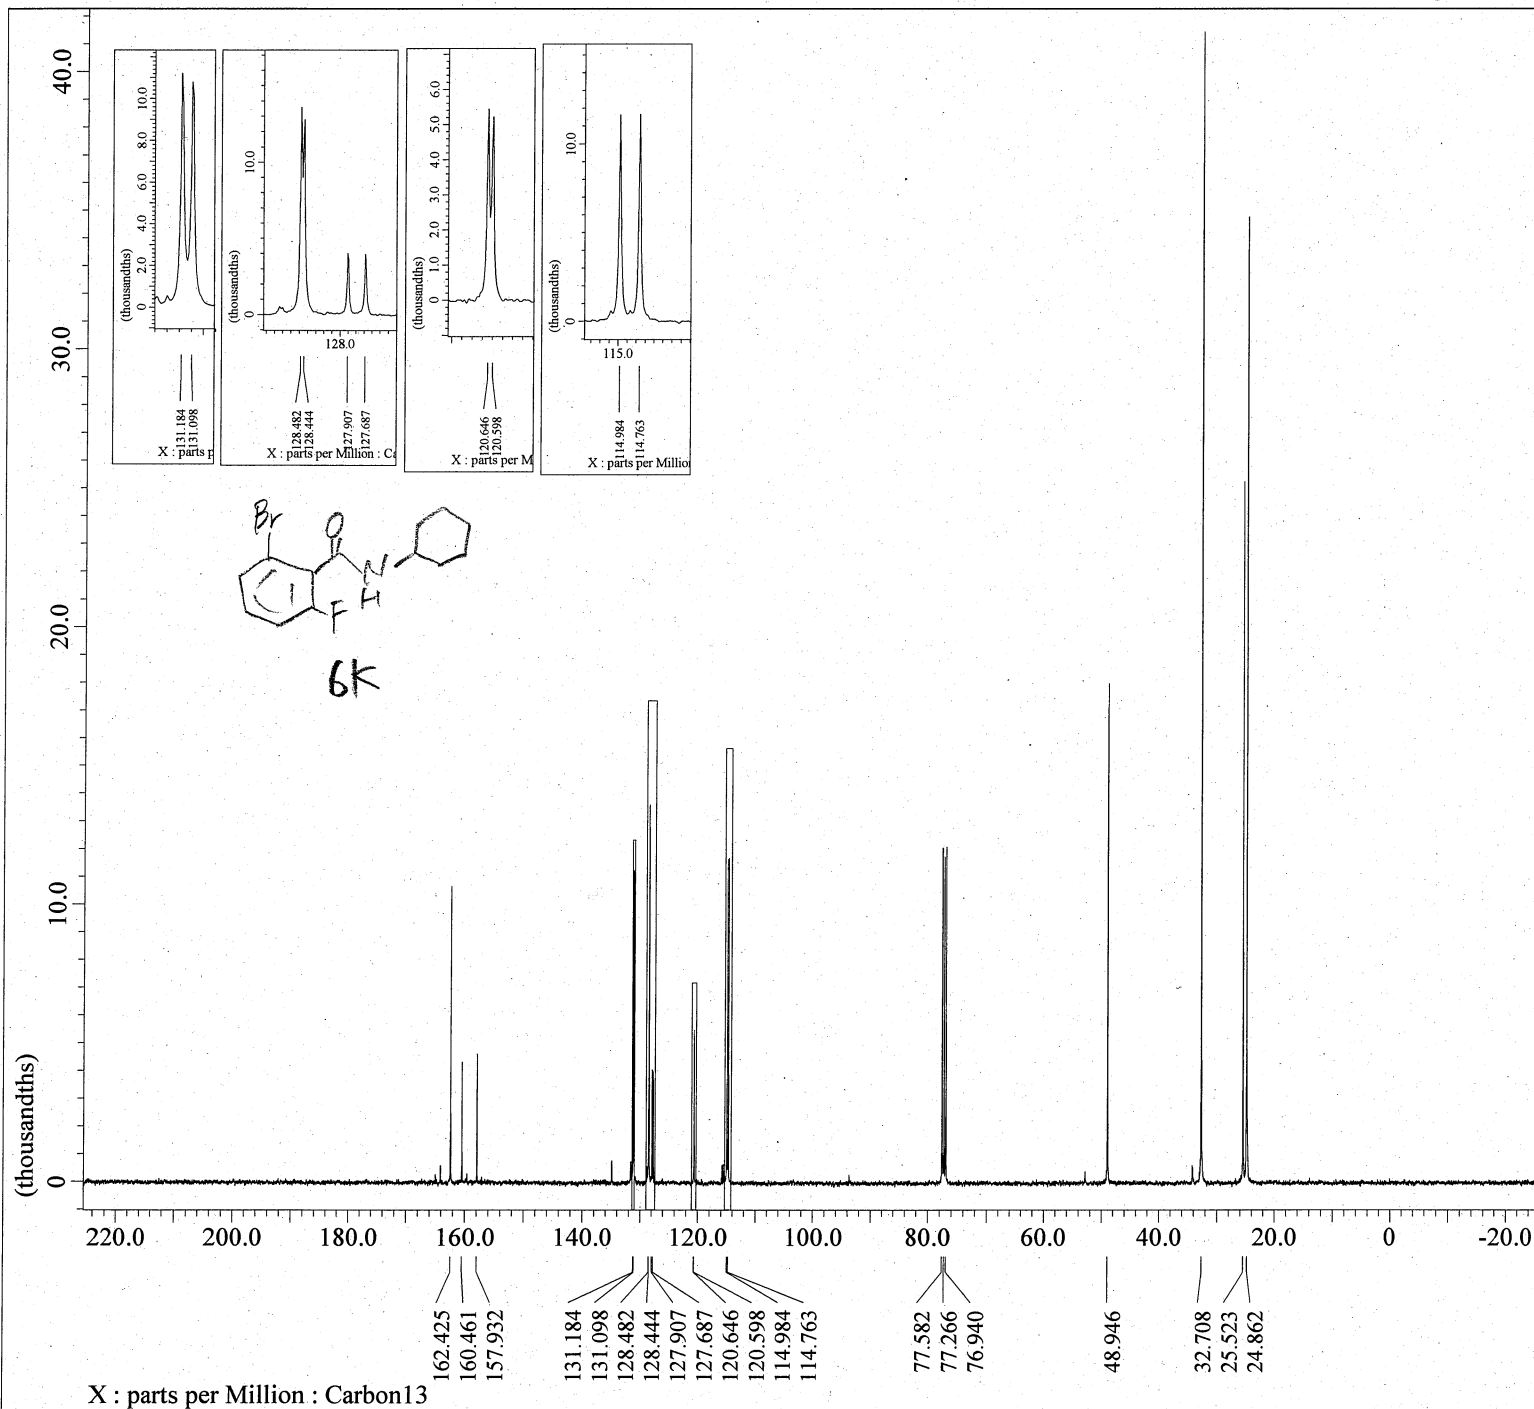

----- PROCESSING PARAMETERS -----  
 sexp( 2.0[Hz], 0.0[s] )  
 trapezoid( 0[%], 0[%], 80[%], 100[%] )  
 zerofill( 1 )  
 fft( 1, TRUE, TRUE )  
 machinephase  
 ppm

以下に由来: TKH-1549\_carbon-1-1.jdf

Filename = TKH-1549\_carbon-1-  
 Author = element  
 Experiment = carbon.jxp  
 Sample\_Id = TKH-1549  
 Solvent = CHLOROFORM-D  
 Actual\_Start\_Time = 10-MAR-2022 09:36:  
 Revision\_Time = 10-MAR-2022 20:47:

Comment = single pulse decou  
 Data Format = 1D COMPLEX  
 Dim\_Size = 26214  
 X\_Domain = Carbon13  
 Dim\_Title = Carbon13  
 Dim\_Units = [ppm]  
 Dimensions = X  
 Spectrometer = DELTA2\_NMR

Field Strength = 9.2982153[T] (400[  
 X\_Acq\_Duration = 1.048576[s]  
 X\_Domain = Carbon13  
 X\_Freq = 99.54517646[MHz]  
 X\_Offset = 100[ppm]  
 X\_Points = 32768  
 X\_Prescans = 4  
 X\_Resolution = 0.95367432[Hz]  
 X\_Sweep = 31.25[kHz]  
 X\_Sweep\_Clippped = 25[kHz]  
 Irr\_Domain = Proton  
 Irr\_Freq = 395.88430144[MHz]  
 Irr\_Offset = 5[ppm]  
 Blanking = 5[us]  
 Clipped = TRUE  
 Scans = 512  
 Total\_Scans = 512

Relaxation\_Delay = 2[s]  
 Recvr\_Gain = 50  
 Temp\_Get = 17.9[dC]  
 X\_90\_Width = 9.65[us]  
 X\_Acq\_Time = 1.048576[s]  
 X\_Angle = 30[deg]  
 X\_Atn = 8[dB]  
 X\_Pulse = 3.21666667[us]  
 Irr\_Atn\_Dec = 25.059[dB]  
 Irr\_Atn\_Dec\_Calc = 25.059[dB]  
 Irr\_Atn\_Dec\_Default\_Calc = 25.059[dB]  
 Irr\_Atn\_No = 25.059[dB]  
 Irr\_Dec\_Bandwidth\_Hz = 4.7826087[kHz]  
 Irr\_Dec\_Bandwidth\_Ppm = 12.08082432[ppm]  
 Irr\_Dec\_Freq = 395.88430144[MHz]  
 Irr\_Dec\_Merit\_Factor = 2.2  
 Irr\_Decoupling = TRUE  
 Irr\_No = TRUE  
 Irr\_Noise = WALTZ  
 Irr\_Offset\_Default = 5[ppm]



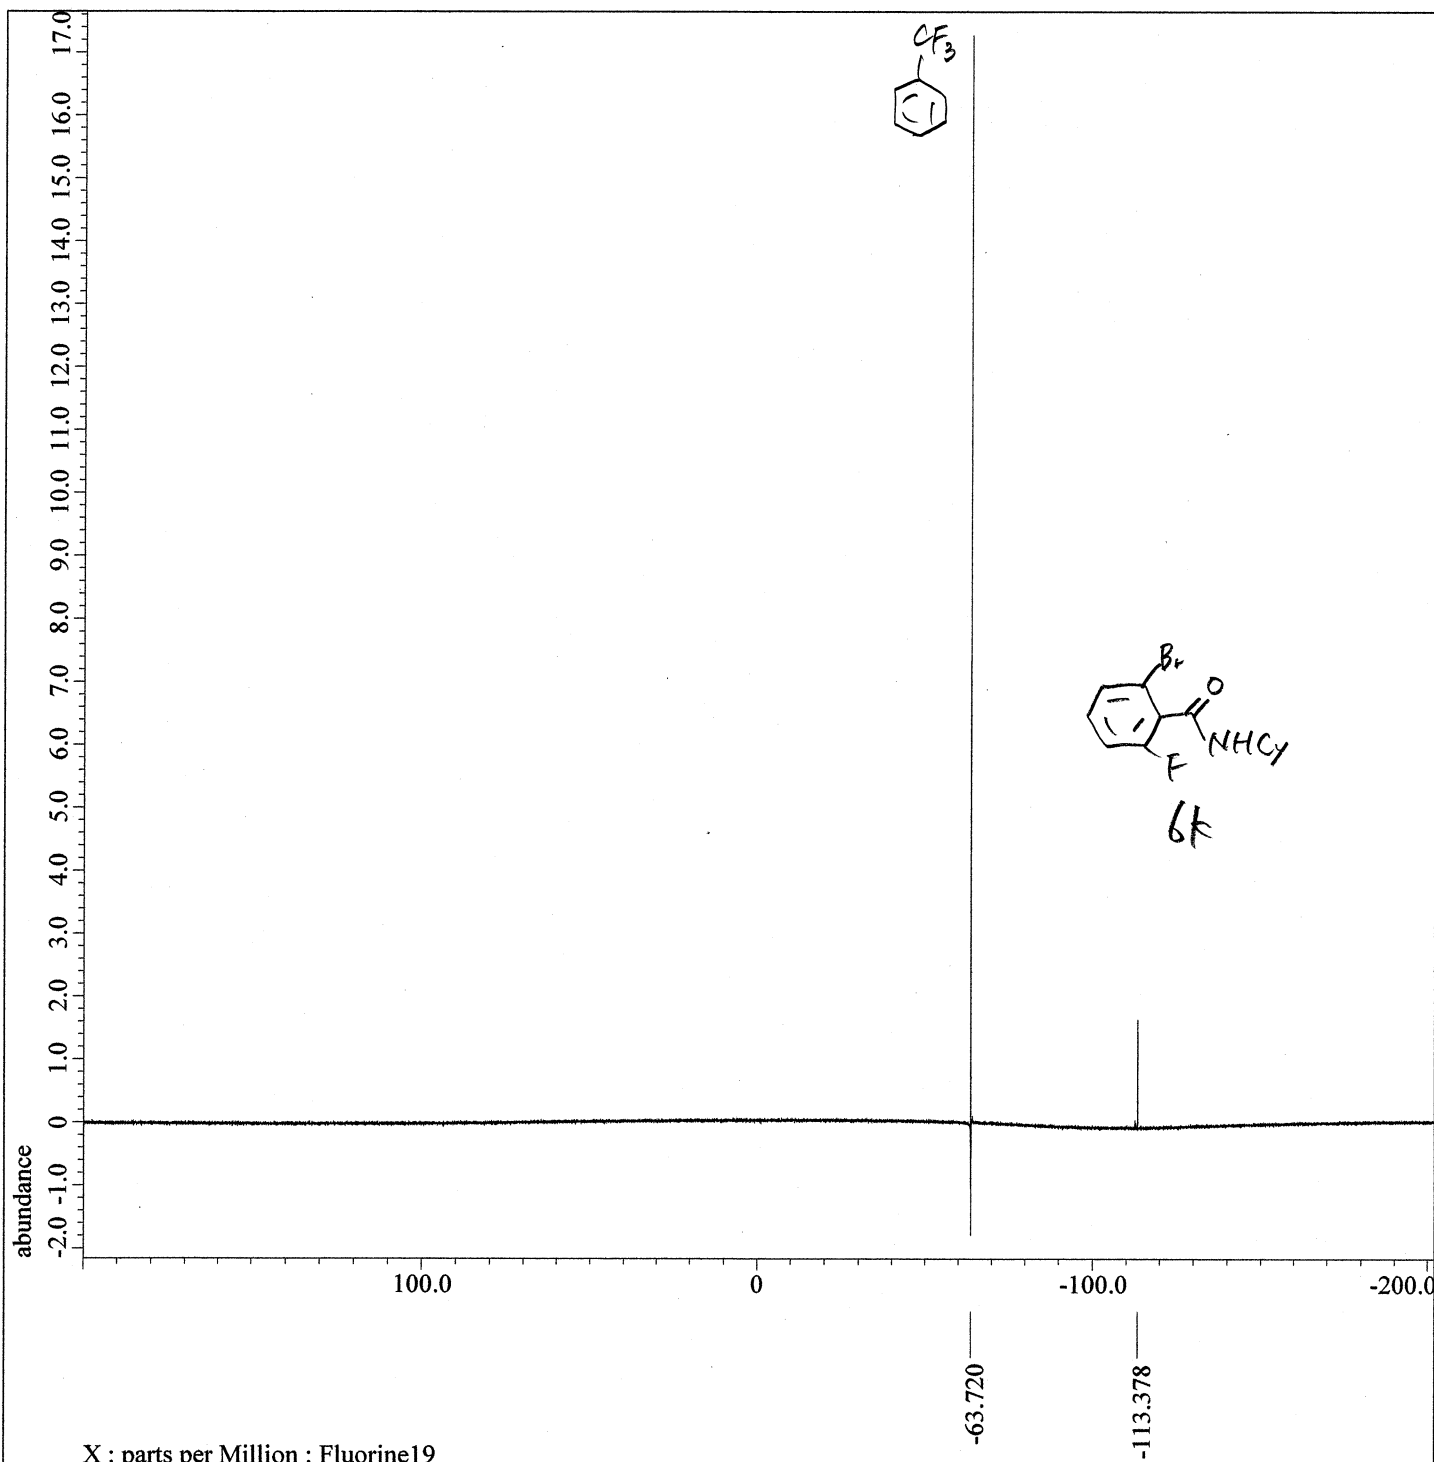

---- PROCESSING PARAMETERS ----  
 dc\_balance( 0, FALSE )  
 sexp( 0.2[Hz], 0.0[s] )  
 trapezoid( 0[%], 0[%], 80[%], 100[%] )  
 zerofill( 1 )  
 fft( 1, TRUE, TRUE )  
 machinephase  
 ppm  
 phase( 61, 0, 50[%] )  
 以下に由来: TKH-1549\_F\_standard\_single\_pulse

Filename = TKH-1549\_F\_standard\_sing  
 Author = element  
 Experiment = single\_pulse.jsp  
 Sample Id = TKH-1549 F standard  
 Solvent = CHLOROFORM-D  
 Creation Time = 5-MAR-2022 16:38:05  
 Revision Time = 5-MAR-2022 19:06:15  
 Current Time = 5-MAR-2022 19:06:19

Comment = single pulse  
 Data Format = 1D COMPLEX  
 Dim Size = 13107  
 Dim Title = Fluorine19  
 Dim Units = [ppm]  
 Dimensions = X  
 Spectrometer = DELTA2\_NMR

Field Strength = 9.4073814[T] (400[MHz])  
 X Acq Duration = 86.50752[ms]  
 X Domain = 19F  
 X Freq = 376.87675879[MHz]  
 X Offset = 0[ppm]  
 X Points = 16384  
 X Prescans = 1  
 X Resolution = 11.55968868[Hz]  
 X Sweep = 189.39393939[kHz]  
 X Sweep Clipped = 151.51515152[kHz]  
 Irr Domain = Fluorine19  
 Irr Freq = 376.87675879[MHz]  
 Irr Offset = 5[ppm]  
 Tri Domain = Fluorine19  
 Tri Freq = 376.87675879[MHz]  
 Tri Offset = 5[ppm]  
 Clipped = FALSE  
 Scans = 8  
 Total Scans = 8

Relaxation Delay = 5[s]  
 Recvr Gain = 46  
 Temp Get = 18.9[dC]  
 X 90 Width = 6.8[us]  
 X Acq Time = 86.50752[ms]  
 X Angle = 45[deg]  
 X Atn = 3[dB]  
 X Pulse = 3.4[us]  
 Irr Mode = Off  
 Tri Mode = Off  
 Dante Presat = FALSE  
 Initial Wait = 1[s]  
 Repetition Time = 5.08650752[s]

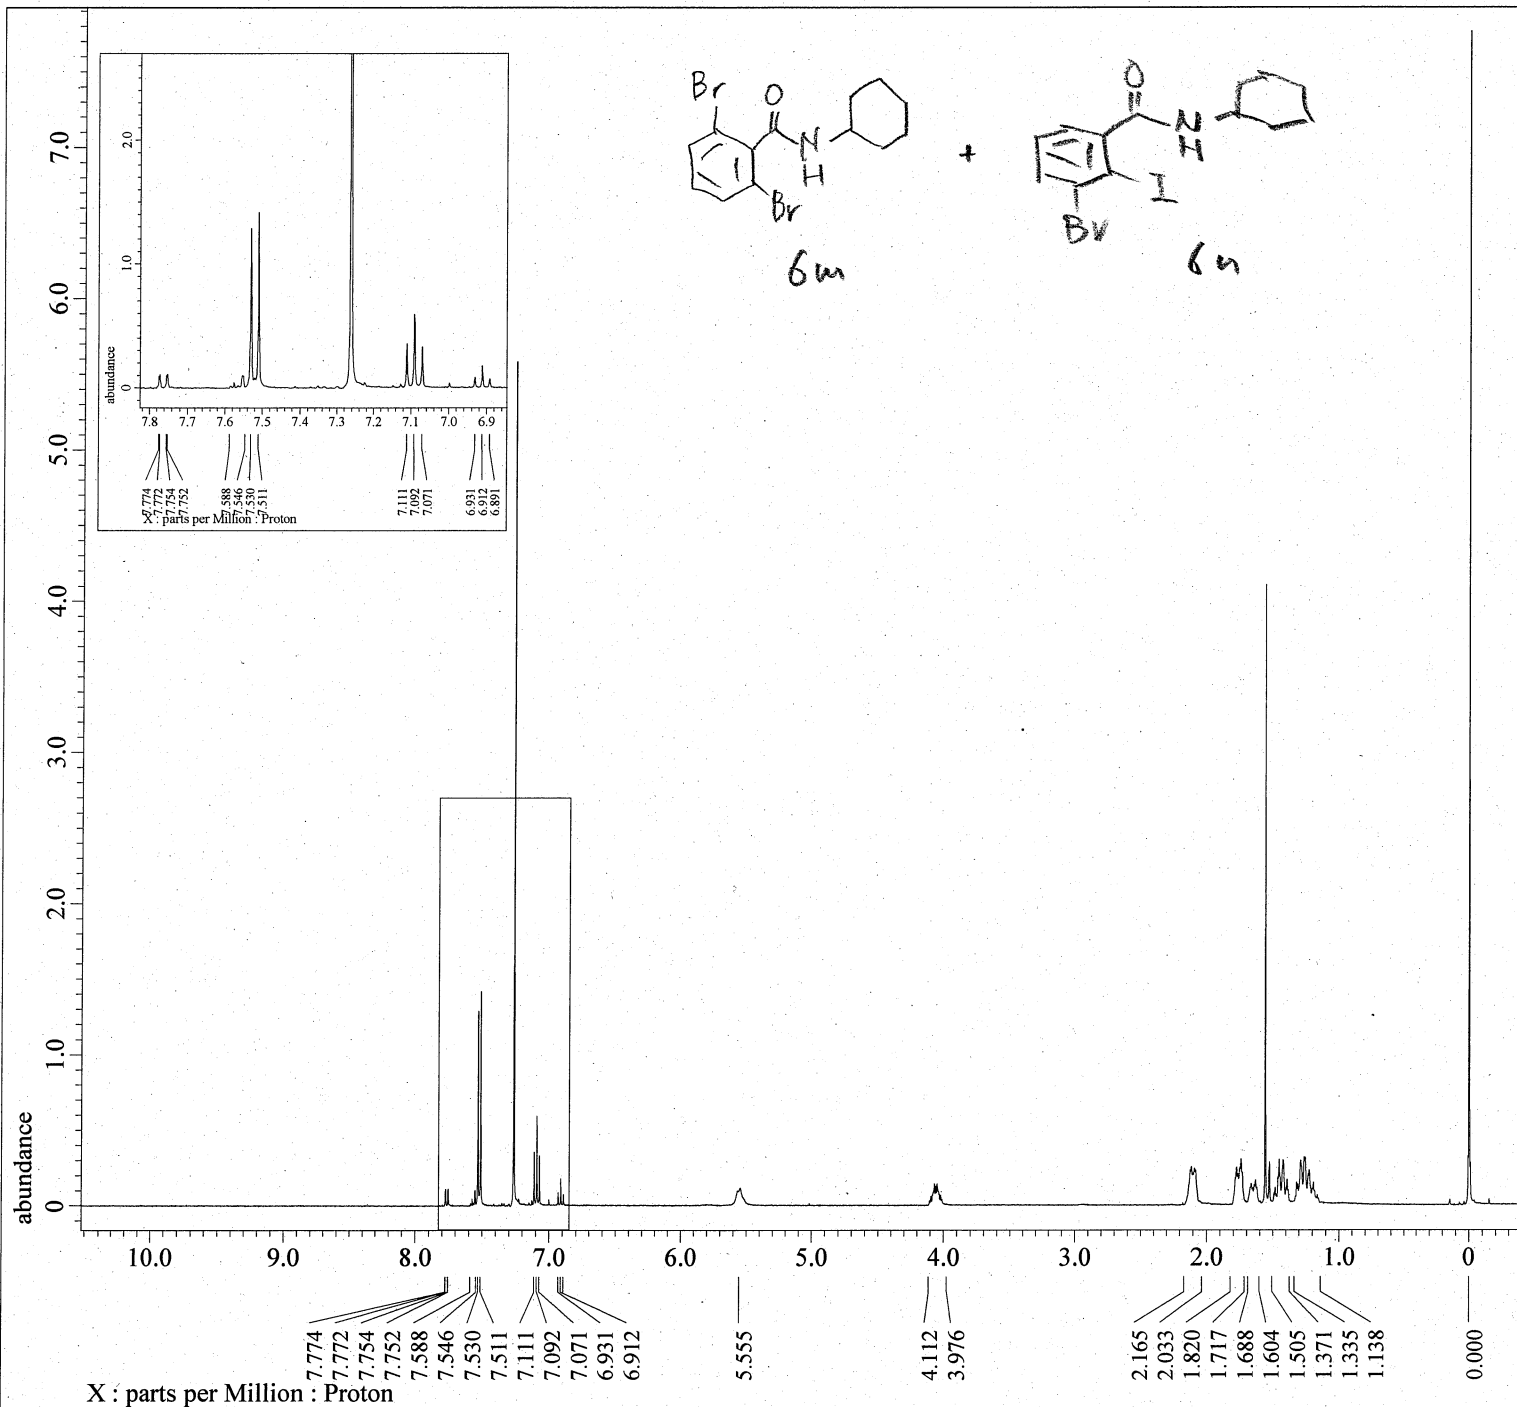

```

---- PROCESSING PARAMETERS ----
dc_balance( 0, FALSE )
sexp( 0.2[Hz], 0.0[s] )
trapezoid( 0[%], 0[%], 80[%], 100[%] )
zerofill( 1 )
fft( 1, TRUE, TRUE )
machinphase
ppm
phase( 5, 0, 50[%] )

```

以下に由来: TKH-1561\_H\_2\_Proton-1-1.jdf

```

Filename      = TKH-1561_H_2_Proton-1-2.j
Author       = element
Experiment   = proton.jxp
Sample_Id    = TKH-1561_H_2
Solvent      = CHLOROFORM-D
Actual_Start_Time = 5-MAR-2022 21:35:42
Revision_Time   = 11-MAR-2022 13:16:52

```

```

Comment      = single pulse
Data Format   = 1D COMPLEX
Dim_Size      = 13107
X_Domain     = Proton
Dim_Title    = Proton
Dim_Units    = [ppm]
Dimensions   = X
Spectrometer = DELTA2_NMR

```

```

Field Strength = 9.4073814[T] (400[MHz])
X_Acq_Duration = 2.18103808[s]
X_Domain      = 1H
X_Freq        = 400.53219825[MHz]
X_Offset      = 5[ppm]
X_Points      = 16384
X_Prescans    = 1
X_Resolution  = 0.45849727[Hz]
X_Sweep       = 7.51201923[kHz]
X_Sweep_Clippped = 6.00961538[kHz]
Irr_Domain    = Proton
Irr_Freq      = 400.53219825[MHz]
Irr_Offset    = 5[ppm]
Tri_Domain    = Proton
Tri_Freq      = 400.53219825[MHz]
Tri_Offset    = 5[ppm]
Clipped       = FALSE
Scans         = 8
Total_Scans   = 8

```

```

Relaxation_Delay = 5[s]
Recvr_Gain       = 50
Temp_Get         = 18.7[dC]
X_90_Width       = 6[us]
X_Acq_Time       = 2.18103808[s]
X_Angle          = 45[deg]
X_Atn            = 0.8[dB]
X_Pulse          = 3[us]
Irr_Mode         = Off
Tri_Mode         = Off
Dante_Presat     = FALSE
Initial_Wait     = 1[s]
Repetition_Time  = 7.18103808[s]

```

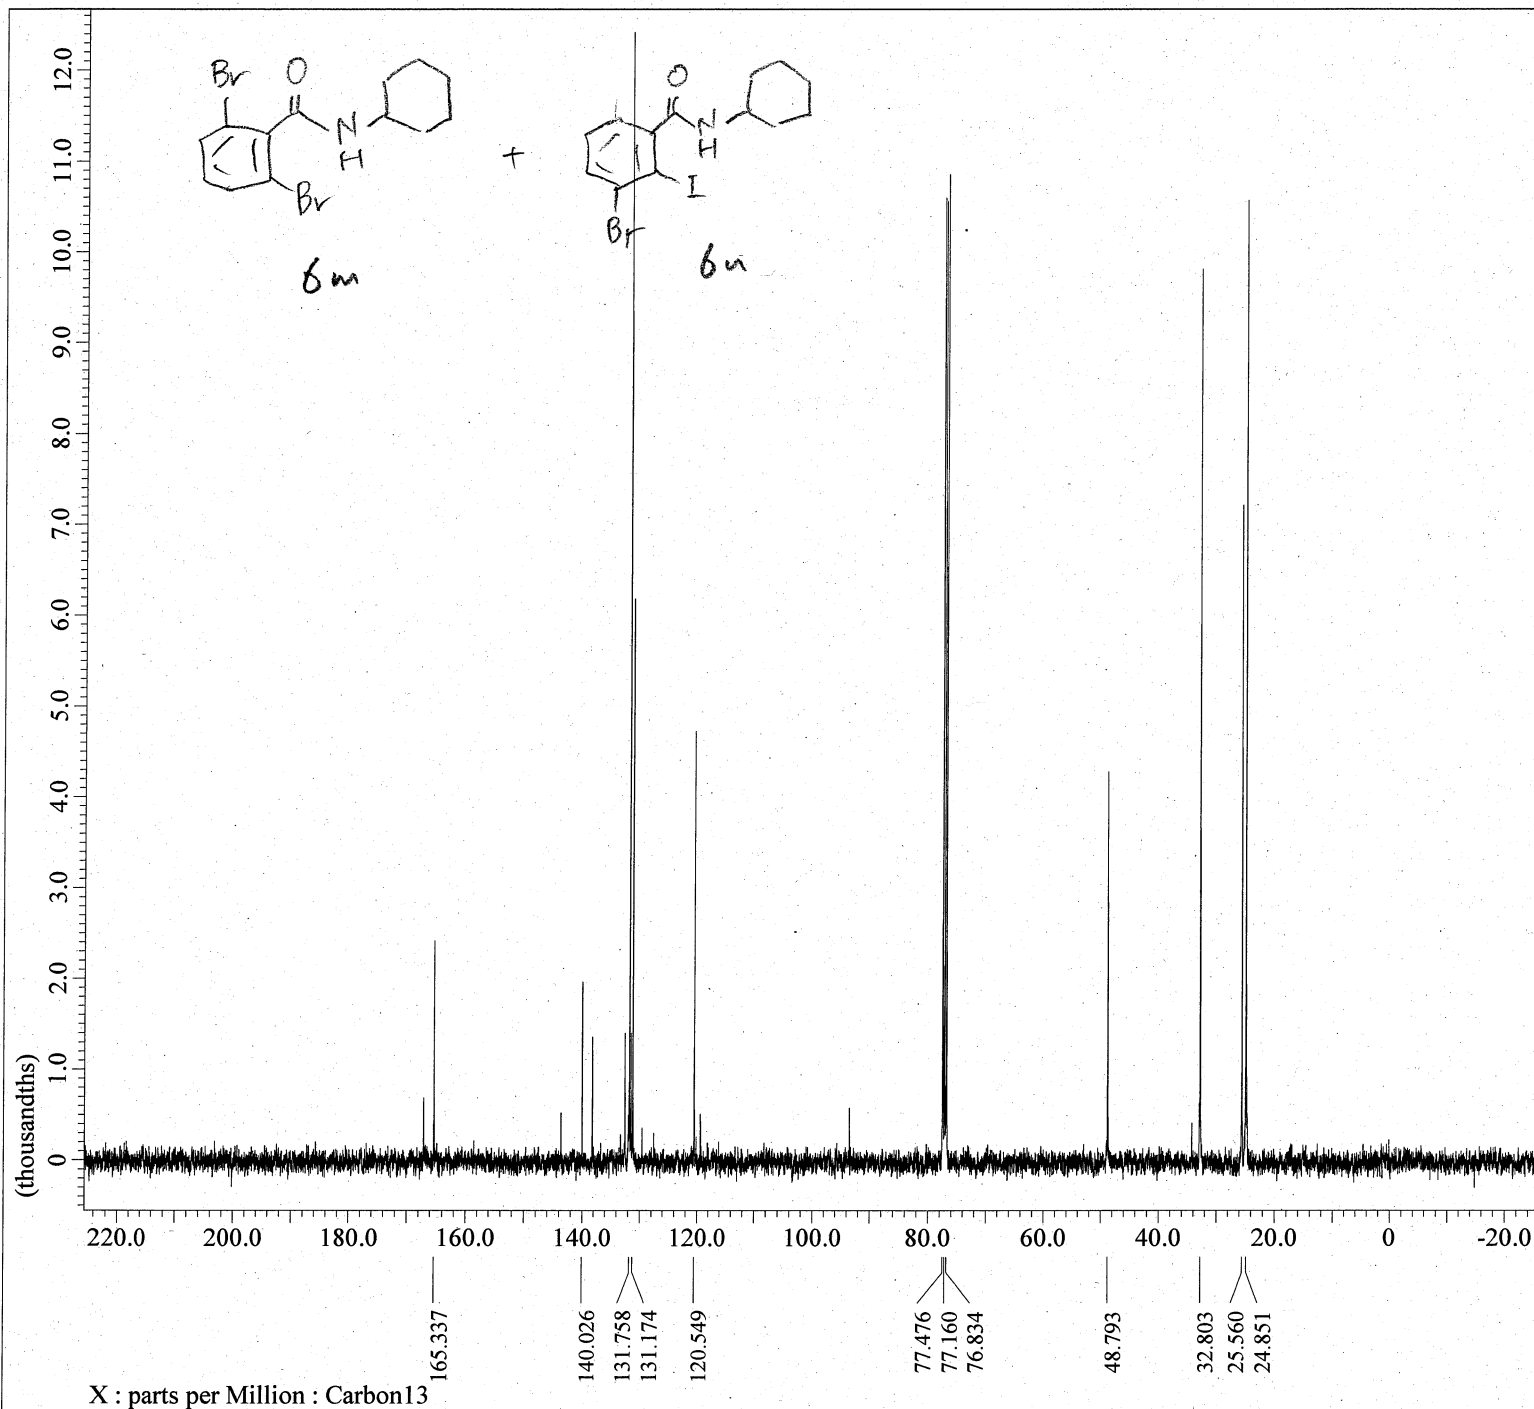

----- PROCESSING PARAMETERS -----  
 sexp( 2.0[Hz], 0.0[s] )  
 trapezoid( 0[%], 0[%], 80[%], 100[%] )  
 zerofill( 1 )  
 fft( 1, TRUE, TRUE )  
 machinephase  
 ppm

以下に由来: TKH-1561\_carbon-1-1.jdf

Filename = TKH-1561\_carbon-1-  
 Author = element  
 Experiment = carbon.jxp  
 Sample\_Id = TKH-1561  
 Solvent = CHLOROFORM-D  
 Actual\_Start\_Time = 10-MAR-2022 09:19:  
 Revision\_Time = 10-MAR-2022 20:57:

Comment = single pulse decou  
 Data Format = 1D COMPLEX  
 Dim\_Size = 26214  
 X\_Domain = Carbon13  
 Dim\_Title = Carbon13  
 Dim\_Units = [ppm]  
 Dimensions = X  
 Spectrometer = DELTA2\_NMR

Field\_Strength = 9.2982153[T] (400[  
 X\_Acq\_Duration = 1.048576[s]  
 X\_Domain = Carbon13  
 X\_Freq = 99.54517646[MHz]  
 X\_Offset = 100[ppm]  
 X\_Points = 32768  
 X\_Prescans = 4  
 X\_Resolution = 0.95367432[Hz]  
 X\_Sweep = 31.25[kHz]  
 X\_Sweep\_Clipped = 25[kHz]  
 Irr\_Domain = Proton  
 Irr\_Freq = 395.88430144[MHz]  
 Irr\_Offset = 5[ppm]  
 Blanking = 5[us]  
 Clipped = TRUE  
 Scans = 200  
 Total\_Scans = 200

Relaxation\_Delay = 2[s]  
 Recvr\_Gain = 50  
 Temp\_Get = 17.8[dC]  
 X\_90\_Width = 9.65[us]  
 X\_Acq\_Time = 1.048576[s]  
 X\_Angle = 30[deg]  
 X\_Atn = 8[dB]  
 X\_Pulse = 3.21666667[us]  
 Irr\_Atn\_Dec = 25.059[dB]  
 Irr\_Atn\_Dec\_Calc = 25.059[dB]  
 Irr\_Atn\_Dec\_Default\_Calc = 25.059[dB]  
 Irr\_Atn\_No = 25.059[dB]  
 Irr\_Dec\_Bandwidth\_Hz = 4.7826087[kHz]  
 Irr\_Dec\_Bandwidth\_Ppm = 12.08082432[ppm]  
 Irr\_Dec\_Freq = 395.88430144[MHz]  
 Irr\_Dec\_Merit\_Factor = 2.2  
 Irr\_Decoupling = TRUE  
 Irr\_No = TRUE  
 Irr\_Noise = WALTZ  
 Irr\_Offset\_Default = 5[ppm]

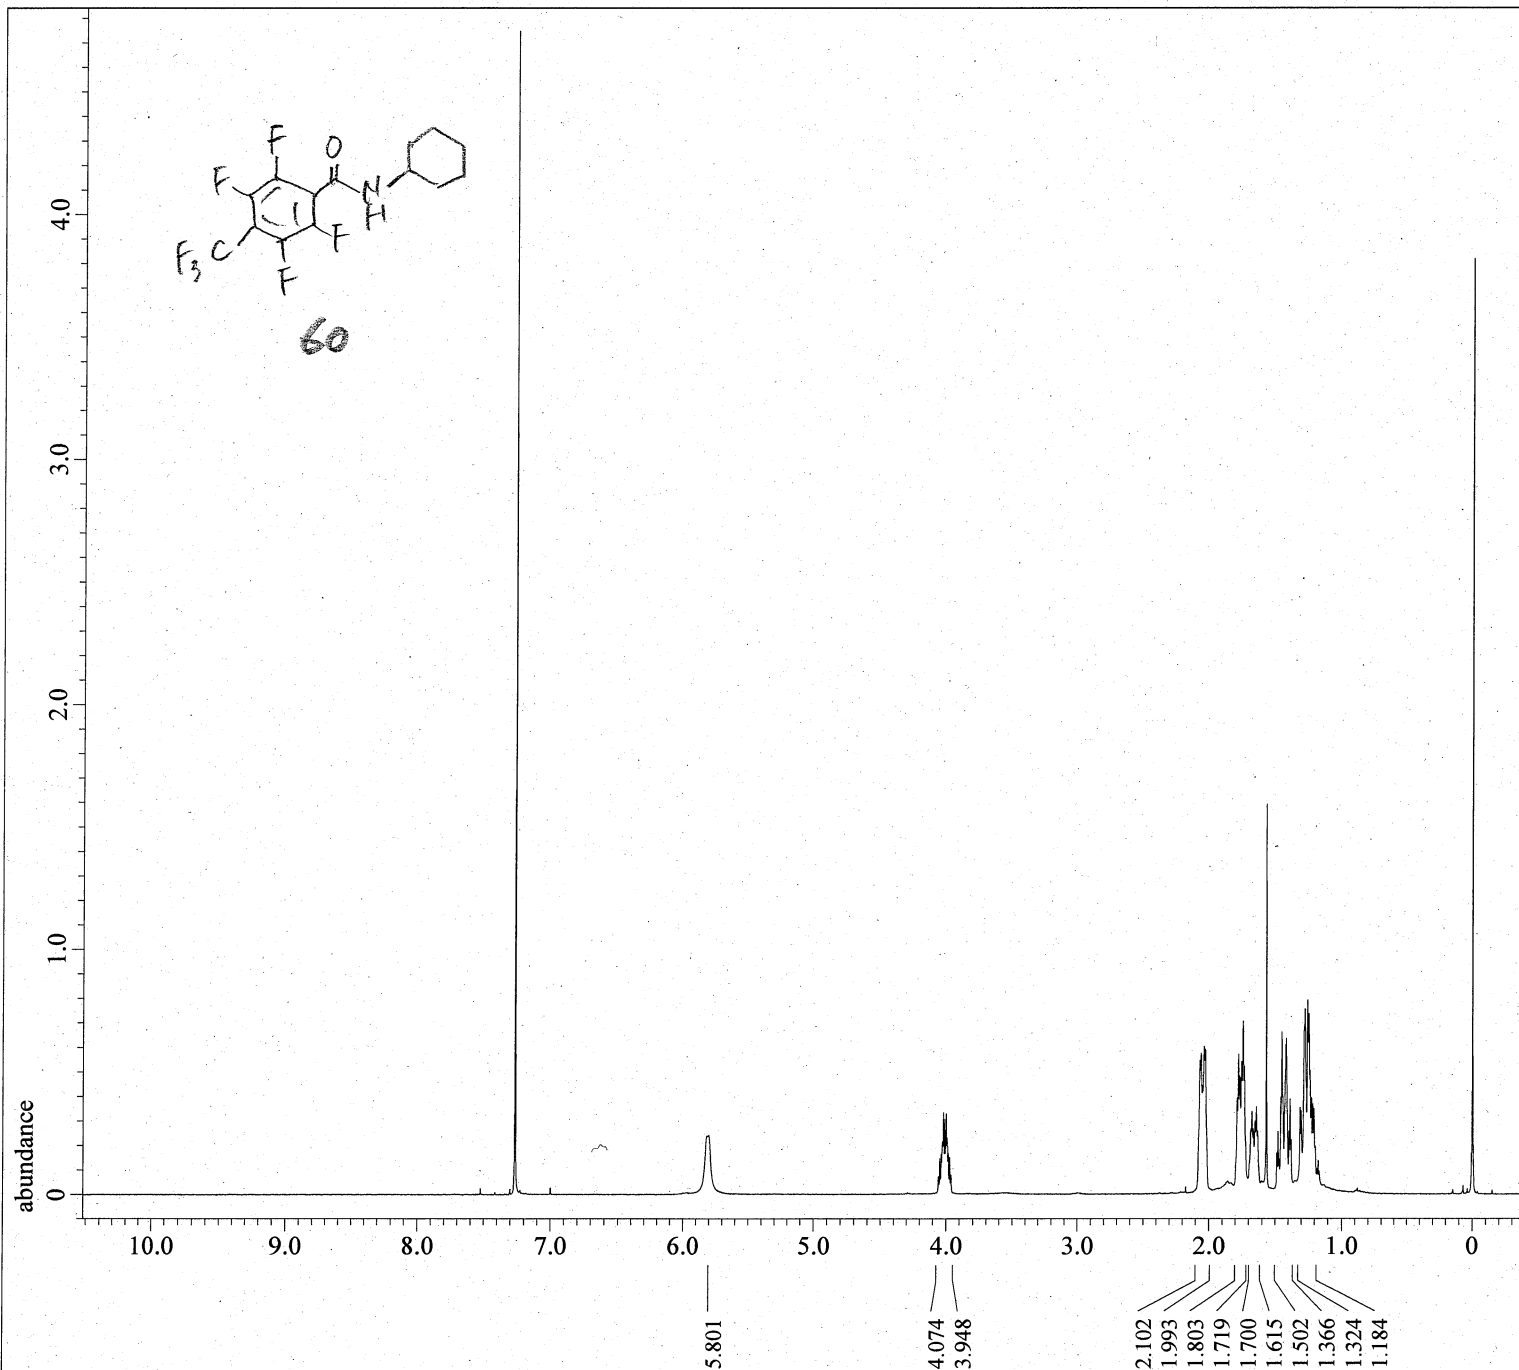

```

---- PROCESSING PARAMETERS ----
dc_balance( 0, FALSE )
sexp( 0.2[Hz], 0.0[s] )
trapezoid( 0[%], 0[%], 80[%], 100[%] )
zerofill( 1 )
fft( 1, TRUE, TRUE )
machinephase
ppm
reference( -0.01845[ppm], 0[ppm] )
phase( 1, 0, 50[%] )

以下に由来: TKH-1525column_Proton-1-1.jdf

Filename      = TKH-1525column_Proton-1-2
Author        = element
Experiment     = proton.jxp
Sample_Id     = TKH-1525column
Solvent       = CHLOROFORM-D
Actual_Start_Time = 8-JAN-2022 18:28:33
Revision_Time  = 11-MAR-2022 13:23:25

Comment       = single pulse
Data_Format   = 1D COMPLEX
Dim_Size      = 13107
X_Domain      = Proton
Dim_Title     = Proton
Dim_Units     = [ppm]
Dimensions    = X
Spectrometer  = DELTA2_NMR

Field Strength = 9.4073814[T] (400[MHz])
X_Acq_Duration = 2.18103808[s]
X_Domain       = 1H
X_Freq         = 400.53219825[MHz]
X_Offset       = 5[ppm]
X_Points       = 16384
X_Prescans     = 1
X_Resolution   = 0.45849727[Hz]
X_Sweep        = 7.51201923[kHz]
X_Sweep_Clippped = 6.00961538[kHz]
Irr_Domain     = Proton
Irr_Freq       = 400.53219825[MHz]
Irr_Offset     = 5[ppm]
Tri_Domain     = Proton
Tri_Freq       = 400.53219825[MHz]
Tri_Offset     = 5[ppm]
Clipped        = FALSE
Scans          = 8
Total_Scans    = 8

Relaxation_Delay = 5[s]
Recvr_Gain       = 44
Temp_Get        = 18.7[dC]
X_90_Width      = 6[us]
X_Acq_Time      = 2.18103808[s]
X_Angle         = 45[deg]
X_Atn           = 0.8[dB]
X_Pulse         = 3[us]
Irr_Mode        = Off
Tri_Mode        = Off
Dante_Preset    = FALSE
Initial_Wait    = 1[s]
Repetition_Time = 7.18103808[s]

```

X : parts per Million : Proton

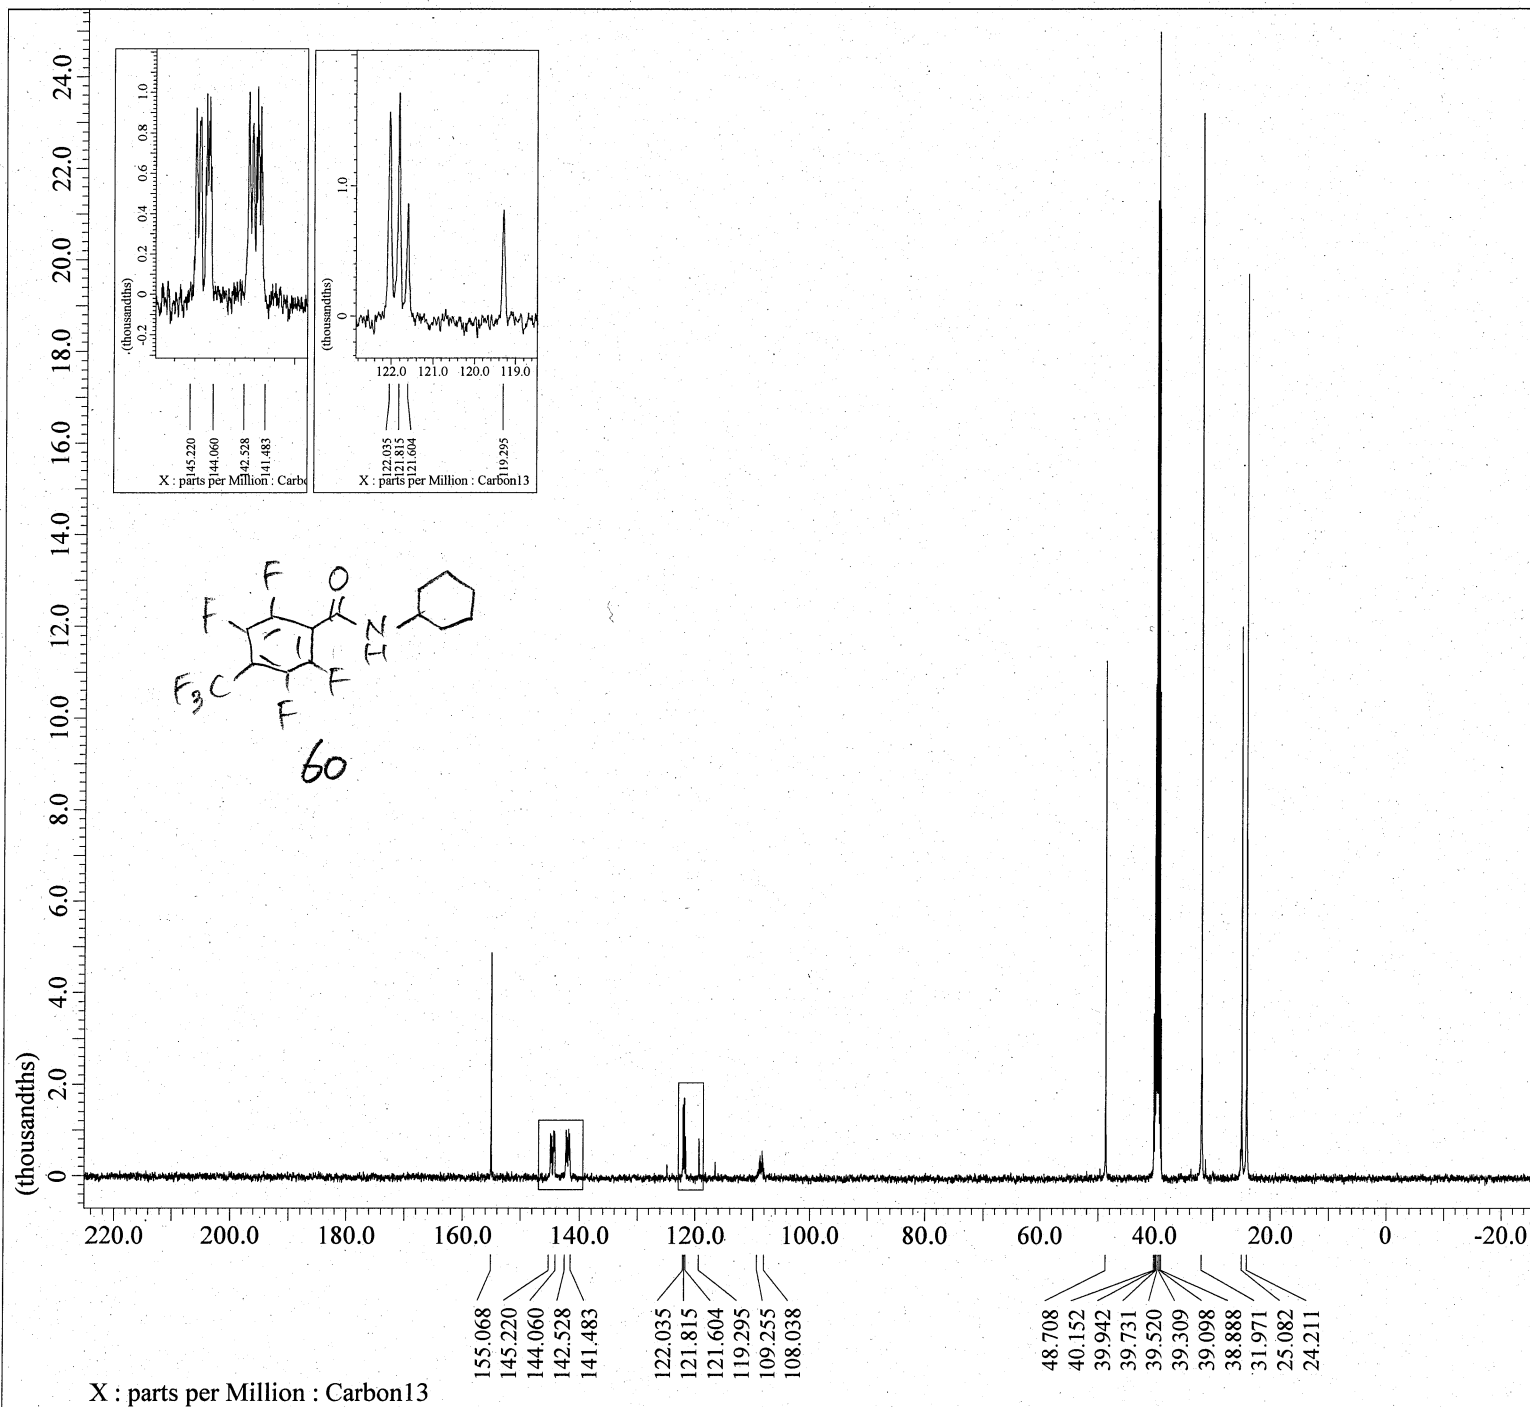

----- PROCESSING PARAMETERS -----

```

sexp( 2.0[Hz], 0.0[s] )
trapezoid( 0[%], 0[%], 80[%], 100[%] )
zerofill( 1 )
fft( 1, TRUE, TRUE )
machinephase
ppm

```

以下に由来: TKH-1525\_DMSO\_carbon-1-1.jdf

|                          |                      |
|--------------------------|----------------------|
| Filename                 | = TKH-1525_DMSO_carb |
| Author                   | = element            |
| Experiment               | = carbon.jxp         |
| Sample_Id                | = TKH-1525_DMSO      |
| Solvent                  | = DMSO-D6            |
| Actual_Start_Time        | = 16-MAR-2022 21:20: |
| Revision_Time            | = 17-MAR-2022 09:09: |
| Comment                  | = single pulse decou |
| Data_Format              | = 1D COMPLEX         |
| Dim_Size                 | = 26214              |
| X_Domain                 | = Carbon13           |
| Dim_Title                | = Carbon13           |
| Dim_Units                | = [ppm]              |
| Dimensions               | = X                  |
| Spectrometer             | = DELTA2_NMR         |
| Field_Strength           | = 9.2982153[T] (400[ |
| X_Acq_Duration           | = 1.048576[s]        |
| X_Domain                 | = Carbon13           |
| X_Freq                   | = 99.54517646[MHz]   |
| X_Offset                 | = 100[ppm]           |
| X_Points                 | = 32768              |
| X_Prescans               | = 4                  |
| X_Resolution             | = 0.95367432[Hz]     |
| X_Sweep                  | = 31.25[kHz]         |
| X_Sweep_Clippped         | = 25[kHz]            |
| Irr_Domain               | = Proton             |
| Irr_Freq                 | = 395.88430144[MHz]  |
| Irr_Offset               | = 5[ppm]             |
| Blanking                 | = 5[us]              |
| Clipped                  | = TRUE               |
| Scans                    | = 512                |
| Total_Scans              | = 512                |
| Relaxation_Delay         | = 2[s]               |
| Recvr_Gain               | = 50                 |
| Temp_Get                 | = 19.4[dC]           |
| X_90_Width               | = 9.65[us]           |
| X_Acq_Time               | = 1.048576[s]        |
| X_Angle                  | = 30[deg]            |
| X_Atn                    | = 8[dB]              |
| X_Pulse                  | = 3.21666667[us]     |
| Irr_Atn_Dec              | = 25.059[dB]         |
| Irr_Atn_Dec_Calc         | = 25.059[dB]         |
| Irr_Atn_Dec_Default_Calc | = 25.059[dB]         |
| Irr_Atn_No               | = 25.059[dB]         |
| Irr_Dec_Bandwidth_Hz     | = 4.7826087[kHz]     |
| Irr_Dec_Bandwidth_Ppm    | = 12.08082432[ppm]   |
| Irr_Dec_Freq             | = 395.88430144[MHz]  |
| Irr_Dec_Merit_Factor     | = 2.2                |
| Irr_Decoupling           | = TRUE               |
| Irr_No                   | = TRUE               |
| Irr_Noise                | = WALTZ              |
| Irr_Offset_Default       | = 5[ppm]             |

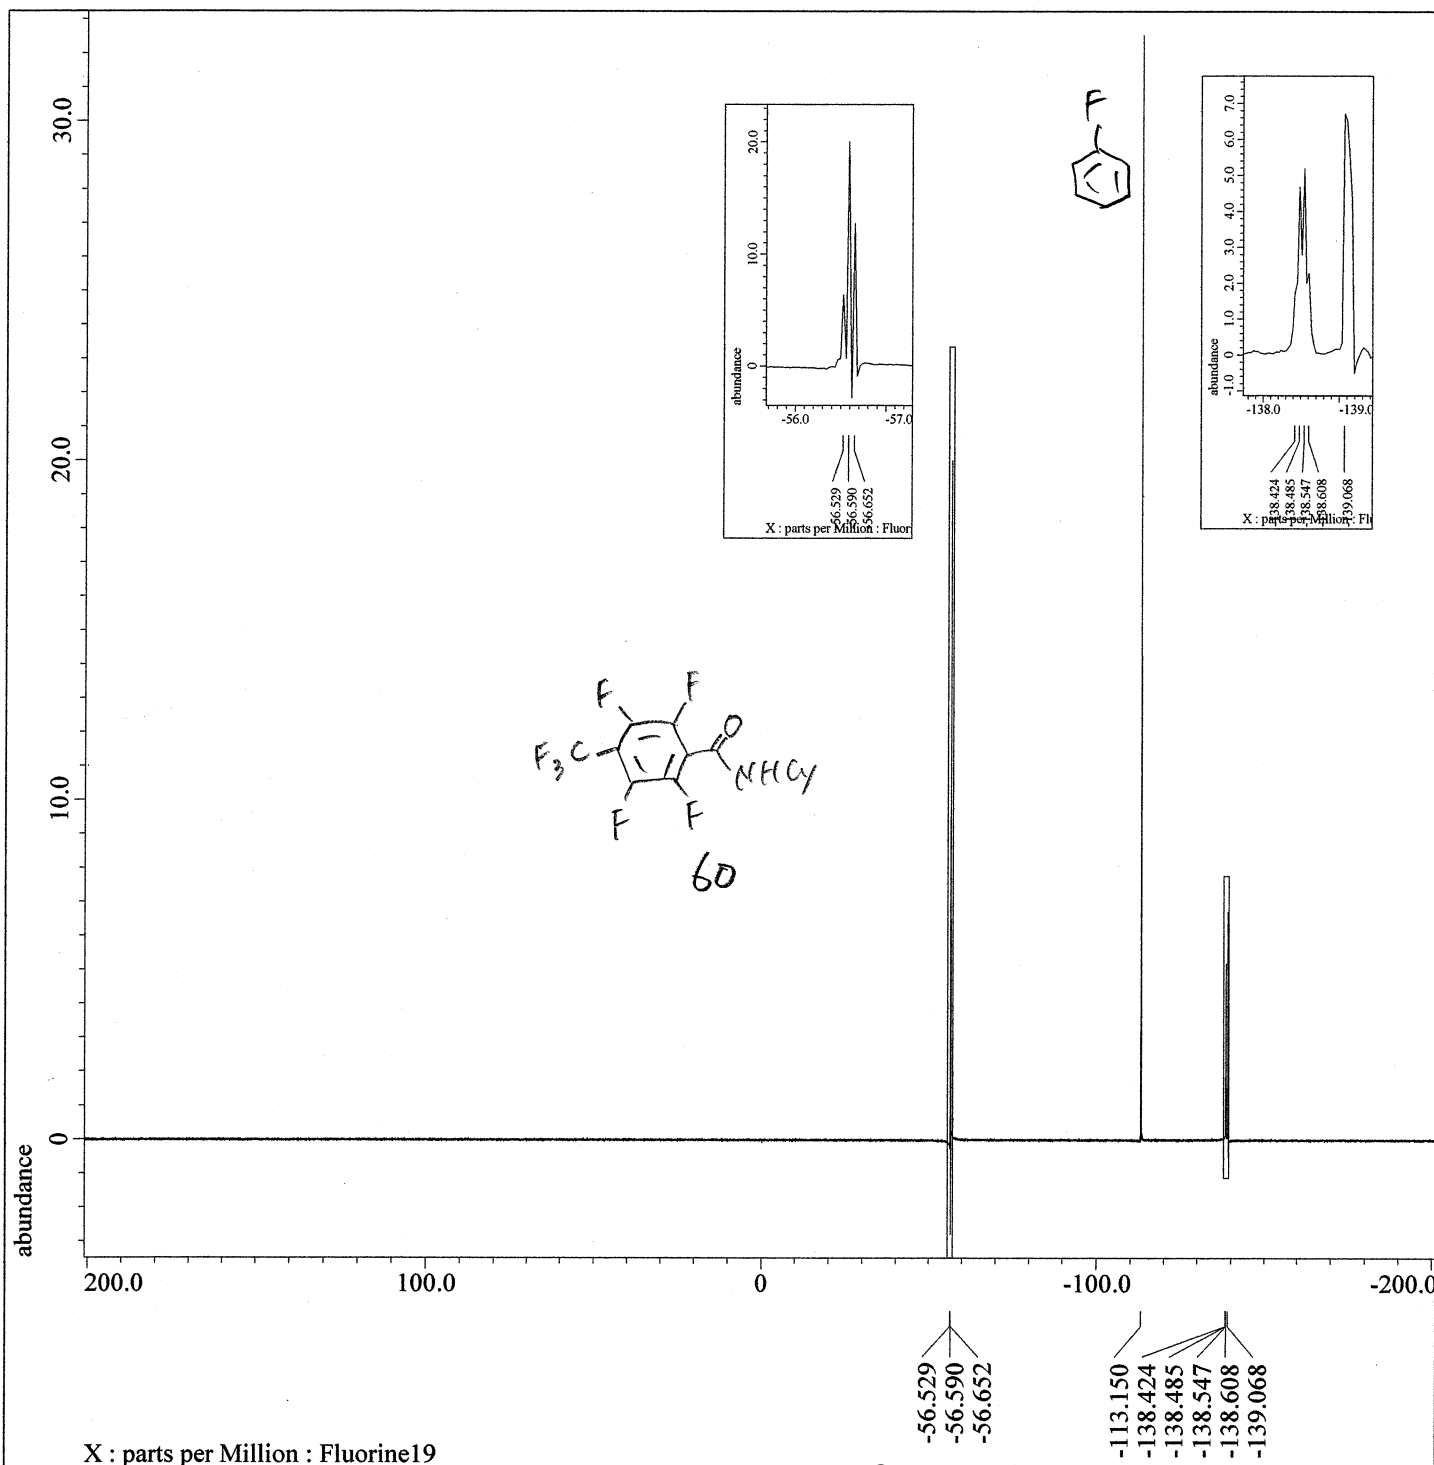

```

---- PROCESSING PARAMETERS ----
dc balance( 0, FALSE )
sexp( 0.2[Hz], 0.0[s] )
trapezoid( 0[%], 0[%], 80[%], 100[%] )
zerofill( 1 )
blip( 16, 64, 32 )
fft( 1, TRUE, TRUE )
machinephase
ppm
phase( 6, 0, 50[%] )

```

以下に由来: TKH-1525\_F\_standard\_single\_pulse

```

Filename      = TKH-1525_F_standard_sing
Author        = element
Experiment     = single_pulse.jpg
Sample Id     = TKH-1525 F standard
Solvent       = CHLOROFORM-D
Creation Time  = 5-MAR-2022 15:21:37
Revision Time = 5-MAR-2022 18:24:39
Current Time  = 5-MAR-2022 18:25:12

```

```

Comment       = single_pulse
Data Format    = 1D COMPLEX
Dim Size      = 13107
Dim Title     = Fluorine19
Dim Units     = [ppm]
Dimensions    = X
Spectrometer  = DELTA2_NMR

```

```

Field Strength = 9.4073814[T] (400[MHz])
X_Acq_Duration = 86.50752[ms]
X_Domain       = 19F
X_Freq         = 376.87675879[MHz]
X_Offset       = 0[ppm]
X_Points       = 16384
X_Prescans     = 1
X_Resolution   = 11.55968868[Hz]
X_Sweep        = 189.39393939[kHz]
X_Sweep_Clipped = 151.51515152[kHz]
Irr_Domain     = Fluorine19
Irr_Freq       = 376.87675879[MHz]
Irr_Offset     = 5[ppm]
Tri_Domain     = Fluorine19
Tri_Freq       = 376.87675879[MHz]
Tri_Offset     = 5[ppm]
Clipped        = FALSE
Scans          = 8
Total_Scans    = 8

```

```

Relaxation_Delay = 5[s]
Recvr Gain       = 48
Temp_Get         = 18.8[dC]
X_90_Width       = 6.8[us]
X_Acq_Time       = 86.50752[ms]
X_Angle          = 45[deg]
X_Atn            = 3[dB]
X_Pulse          = 3.4[us]
Irr_Mode         = Off
Tri_Mode         = Off
Dante Presat     = FALSE
Initial Wait     = 1[s]
Repetition_Time  = 5.08650752[s]

```

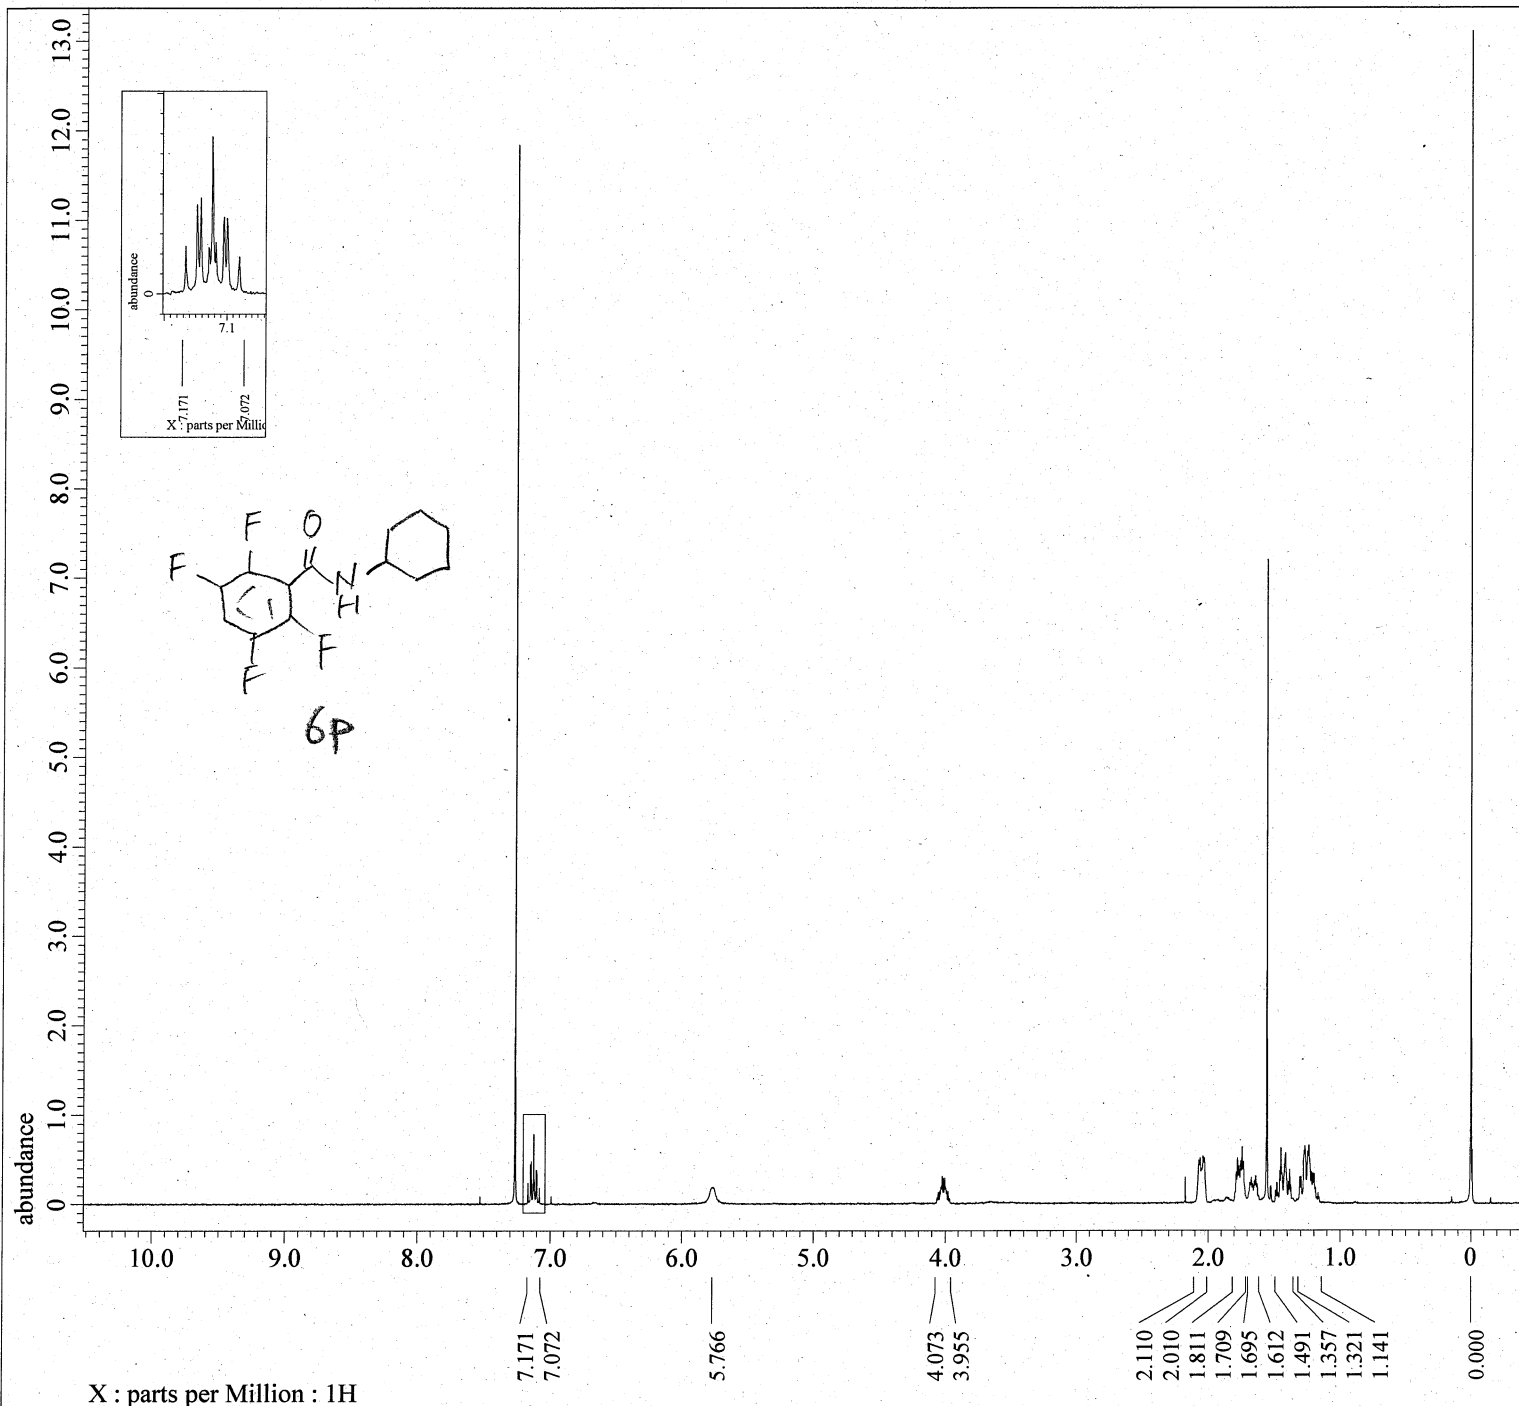

```

---- PROCESSING PARAMETERS ----
dc_balance( 0, FALSE )
sexp( 0.2[Hz], 0.0[s] )
trapezoid3( 0[%], 80[%], 100[%] )
zerofill( 1 )
fft( 1, TRUE, TRUE )
machinephase
ppm
reference( -0.01381[ppm], 0[ppm] )
phase( 2, 0, 50[%] )

以下に由来: TKH-1520column17-20-1.jdf

Filename      = TKH-1520column17-20-2.jdf
Author       = element
Experiment    = single_pulse.ex2
Sample_Id    = 1
Solvent      = CHLOROFORM-D
Actual_Start_Time = 16-DEC-2021 23:40:40
Revision_Time = 11-MAR-2022 13:30:19

Comment      = single_pulse
Data_Format  = 1D COMPLEX
Dim_Size     = 13107
X_Domain     = 1H
Dim_Title    = 1H
Dim_Units    = [ppm]
Dimensions   = X
Site         = ECS 400
Spectrometer = JNM-ECS400

Field_Strength = 9.20197068[T] (390[MHz])
X_Acq_Duration = 2.228224[s]
X_Domain      = 1H
X_Freq        = 391.78655441[MHz]
X_Offset      = 5[ppm]
X_Points      = 16384
X_Prescans    = 1
X_Resolution  = 0.44878791[Hz]
X_Sweep       = 7.35294118[kHz]
Irr_Domain    = 1H
Irr_Freq      = 391.78655441[MHz]
Irr_Offset    = 5[ppm]
Tri_Domain    = 1H
Tri_Freq      = 391.78655441[MHz]
Tri_Offset    = 5[ppm]
Clipped       = FALSE
Scans         = 8
Total_Scans   = 8

Relaxation_Delay = 5[s]
Recvr_Gain       = 58
Temp_Get        = 20.5[dC]
X_90_Width      = 10.8[us]
X_Acq_Time      = 2.228224[s]
X_Angle         = 45[deg]
X_Atn           = 1.9[dB]
X_Pulse         = 5.4[us]
Irr_Mode        = Off
Tri_Mode        = Off
Dante_Presat    = FALSE
Initial_Wait    = 1[s]
Repetition_Time = 7.228224[s]
  
```

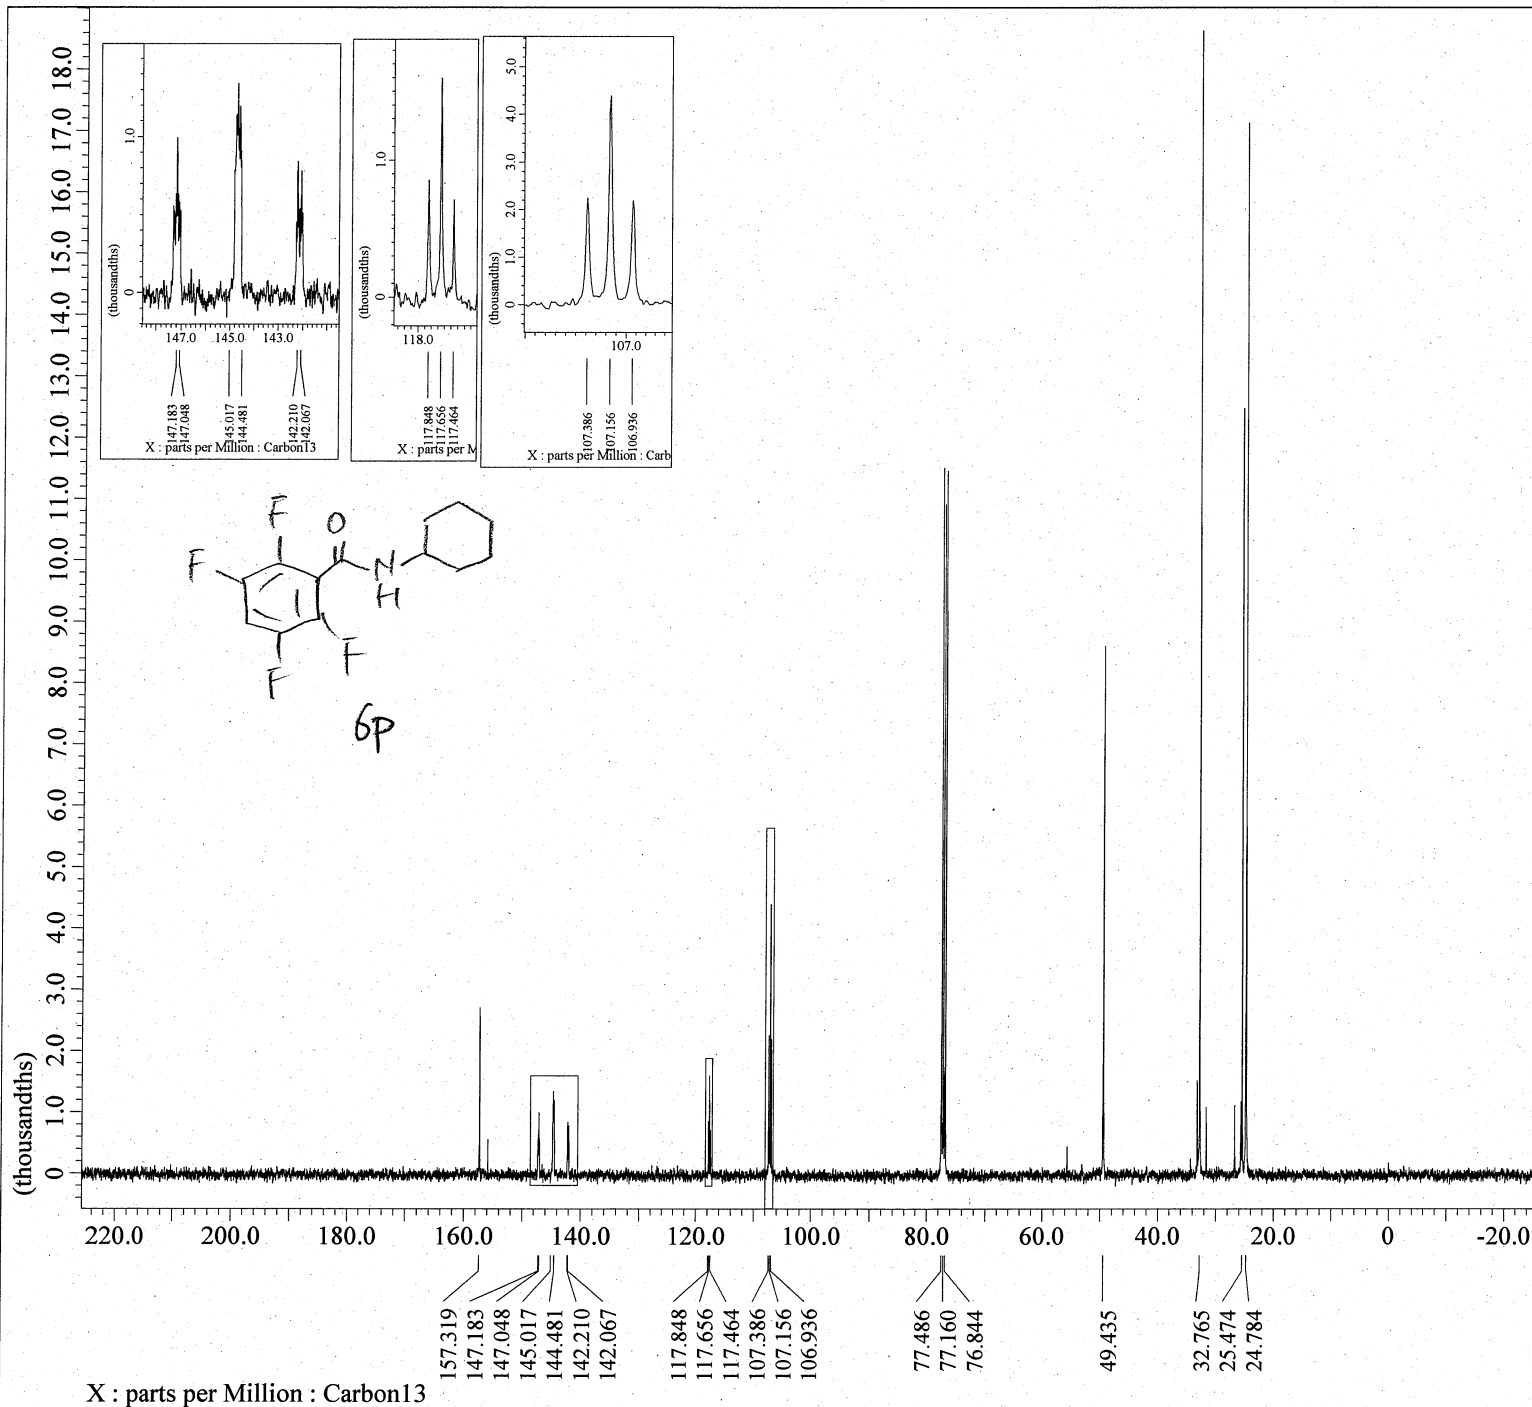

----- PROCESSING PARAMETERS -----  
sexp( 2.0[Hz], 0.0[s] )  
trapezoid( 0[%], 0[%], 80[%], 100[%] )  
zerofill( 1 )  
fft( 1, TRUE, TRUE )  
machinephase  
ppm

以下に由来: TKH-1520\_carbon-1-1.jdf

Filename = TKH-1520\_carbon-1-  
Author = element  
Experiment = carbon.jxp  
Sample\_Id = TKH-1520  
Solvent = CHLOROFORM-D  
Actual\_Start\_Time = 10-MAR-2022 15:01:  
Revision\_Time = 10-MAR-2022 21:16:

Comment = single pulse decou  
Data\_Format = 1D COMPLEX  
Dim\_Size = 26214  
X\_Domain = Carbon13  
Dim\_Title = Carbon13  
Dim\_Units = [ppm]  
Dimensions = X  
Spectrometer = DELTA2\_NMR

Field\_Strength = 9.2982153[T] (400[  
X\_Acq\_Duration = 1.048576[s]  
X\_Domain = Carbon13  
X\_Freq = 99.54517646[MHz]  
X\_Offset = 100[ppm]  
X\_Points = 32768  
X\_Prescans = 4  
X\_Resolution = 0.95367432[Hz]  
X\_Sweep = 31.25[kHz]  
X\_Sweep\_Clipped = 25[kHz]  
Irr\_Domain = Proton  
Irr\_Freq = 395.88430144[MHz]  
Irr\_Offset = 5[ppm]  
Blanking = 5[us]  
Clipped = TRUE  
Scans = 400  
Total\_Scans = 400

Relaxation\_Delay = 2[s]  
Recvr\_Gain = 50  
Temp\_Get = 18.6[dC]  
X\_90\_Width = 9.65[us]  
X\_Acq\_Time = 1.048576[s]  
X\_Angle = 30[deg]  
X\_Atn = 8[dB]  
X\_Pulse = 3.21666667[us]  
Irr\_Atn\_Dec = 25.059[dB]  
Irr\_Atn\_Dec\_Calc = 25.059[dB]  
Irr\_Atn\_Dec\_Default\_Calc = 25.059[dB]  
Irr\_Atn\_No = 25.059[dB]  
Irr\_Dec\_Bandwidth\_Hz = 4.7826087[kHz]  
Irr\_Dec\_Bandwidth\_Ppm = 12.08082432[ppm]  
Irr\_Dec\_Freq = 395.88430144[MHz]  
Irr\_Dec\_Merit\_Factor = 2.2  
Irr\_Decoupling = TRUE  
Irr\_No = TRUE  
Irr\_Noise = WALTZ  
Irr\_Offset\_Default = 5[ppm]



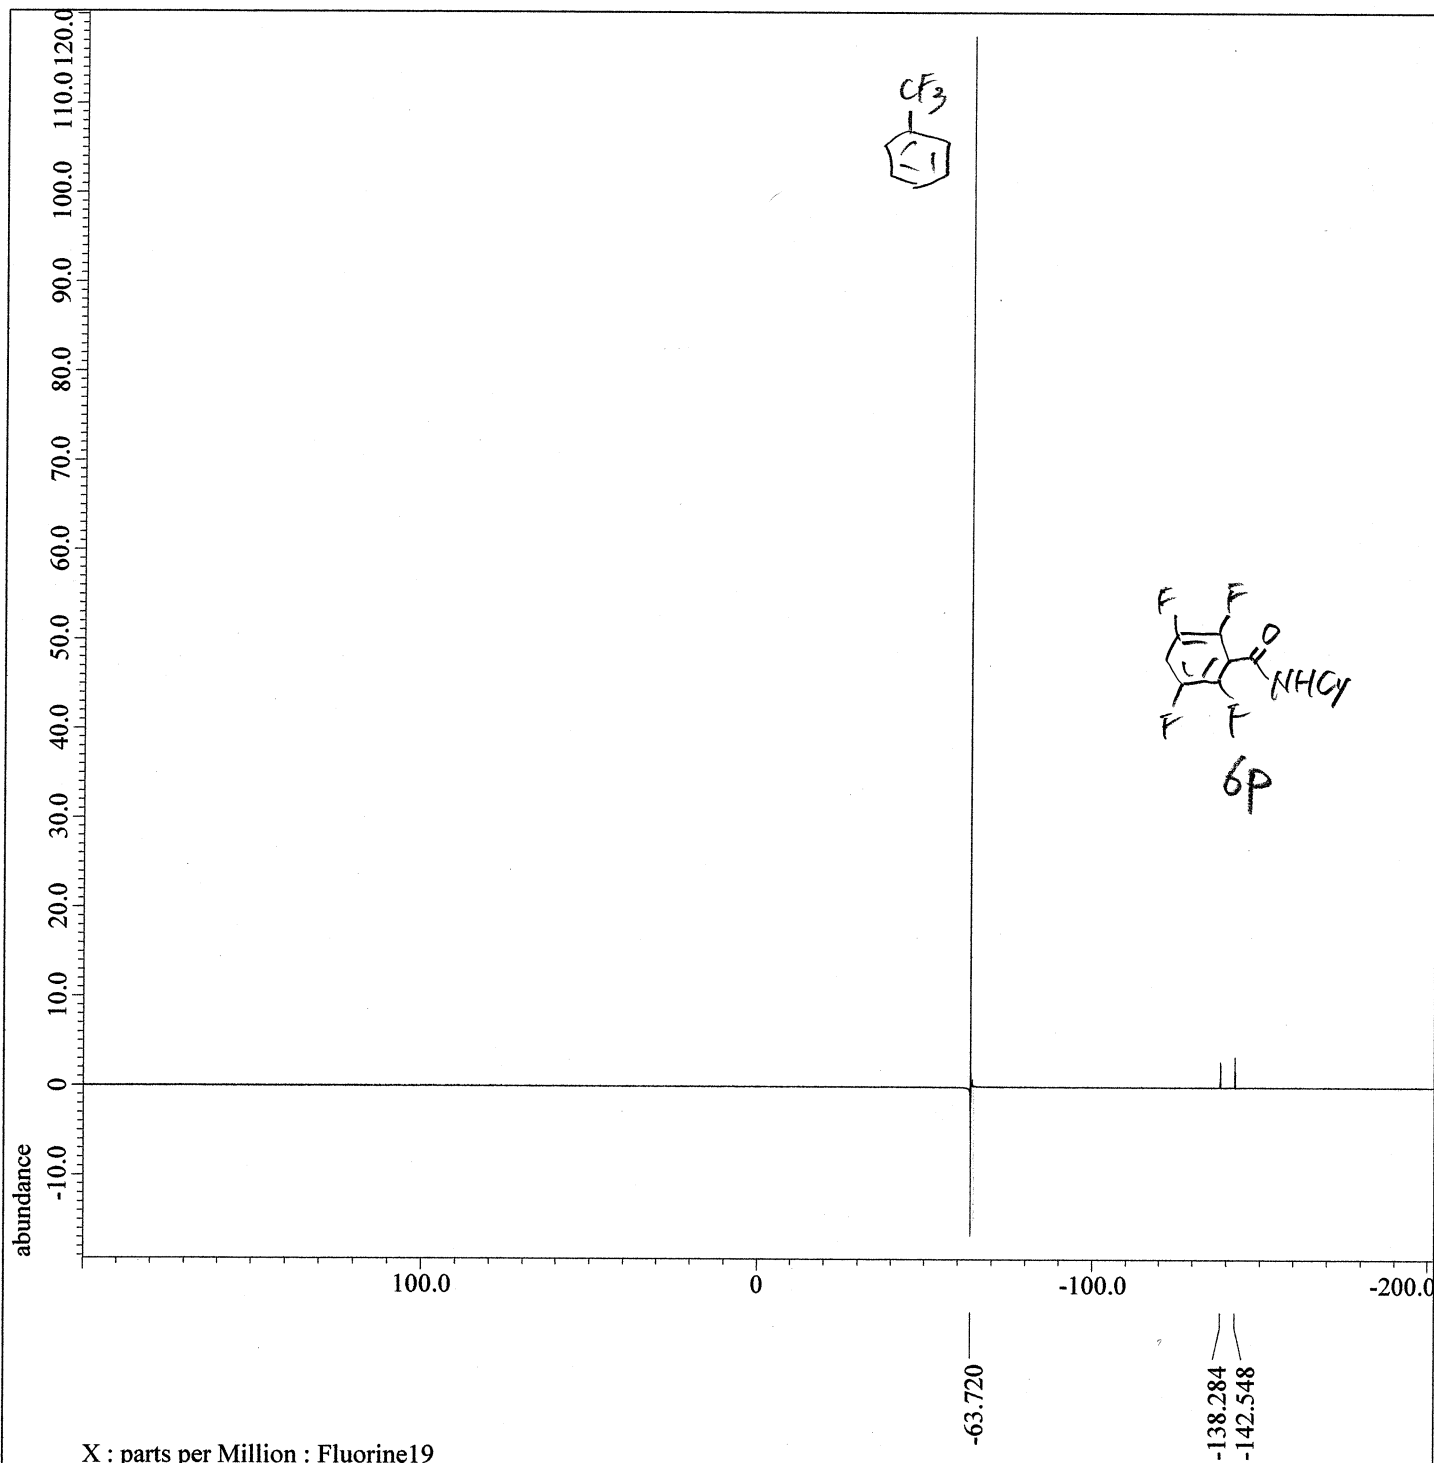

----- PROCESSING PARAMETERS -----  
 dc\_balance( 0, FALSE )  
 sexp( 0.2[Hz], 0.0[s] )  
 trapezoid( 0[%], 0[%], 80[%], 100[%] )  
 zerofill( 1 )  
 blip( 16, 64, 32 )  
 fft( 1, TRUE, TRUE )  
 machinephase  
 ppm  
 phase( 14, 0, 50[%] )

以下に由来: TKH-1520\_F\_standard\_single\_pulse

Filename = TKH-1520\_F\_standard\_sing  
 Author = element  
 Experiment = single\_pulse.jxp  
 Sample Id = TKH-1520 F standard  
 Solvent = CHLOROFORM-D  
 Creation\_Time = 5-MAR-2022 15:29:14  
 Revision\_Time = 5-MAR-2022 18:22:26  
 Current\_Time = 5-MAR-2022 18:22:30

Comment = single\_pulse  
 Data\_Format = 1D\_COMPLEX  
 Dim\_Size = 13107  
 Dim\_Title = Fluorine19  
 Dim\_Units = [ppm]  
 Dimensions = X  
 Spectrometer = DELTA2\_NMR

Field Strength = 9.4073814[T] (400[MHz])  
 X\_Acq\_Duration = 86.50752[ms]  
 X\_Domain = 19F  
 X\_Freq = 376.87675879[MHz]  
 X\_Offset = 0[ppm]  
 X\_Points = 16384  
 X\_Prescans = 1  
 X\_Resolution = 11.55968868[Hz]  
 X\_Sweep = 189.39393939[kHz]  
 X\_Sweep\_Clippped = 151.51515152[kHz]  
 Irr\_Domain = Fluorine19  
 Irr\_Freq = 376.87675879[MHz]  
 Irr\_Offset = 5[ppm]  
 Tri\_Domain = Fluorine19  
 Tri\_Freq = 376.87675879[MHz]  
 Tri\_Offset = 5[ppm]  
 Clipped = FALSE  
 Scans = 8  
 Total\_Scans = 8

Relaxation\_Delay = 5[s]  
 Recvr\_Gain = 46  
 Temp\_Get = 18.8[dC]  
 X\_90\_Width = 6.8[us]  
 X\_Acq\_Time = 86.50752[ms]  
 X\_Angle = 45[deg]  
 X\_Atn = 3[dB]  
 X\_Pulse = 3.4[us]  
 Irr\_Mode = Off  
 Tri\_Mode = Off  
 Dante\_Presat = FALSE  
 Initial\_Wait = 1[s]  
 Repetition\_Time = 5.08650752[s]

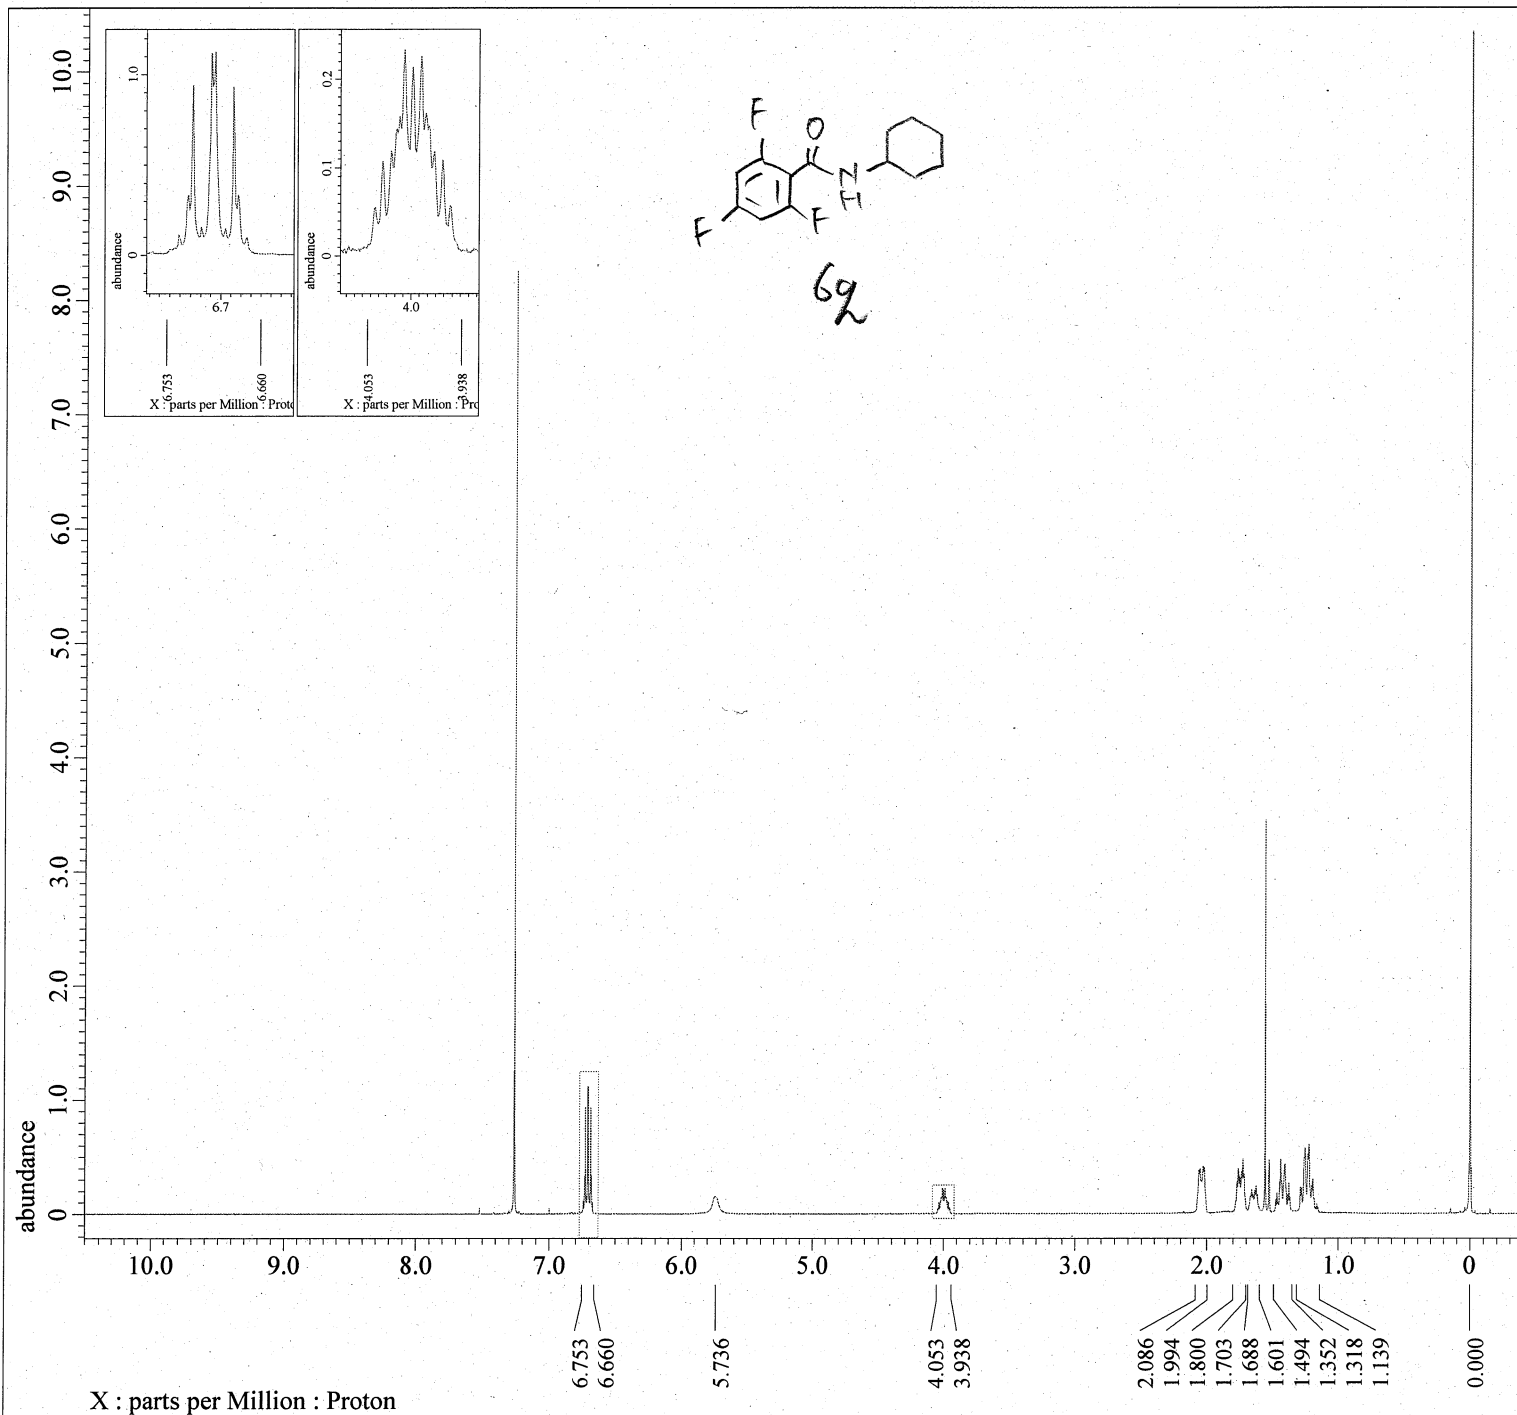

```

---- PROCESSING PARAMETERS ----
dc_balance( 0, FALSE )
sexf( 0.2[Hz], 0.0[s] )
trapezoid( 0[%], 0[%], 80[%], 100[%] )
zerofill( 1 )
fft( 1, TRUE, TRUE )
machinephase
ppm

```

Derived from: TKH-1535\_H\_proton-1-1.jdf

```

Filename      = TKH-1535_H_proton-1-2.jdf
Author       = element
Experiment    = proton.jxp
Sample_Id     = TKH-1535_H
Solvent       = CHLOROFORM-D
Actual_Start_Time = 14-MAR-2022 15:32:20
Revision_Time  = 16-MAR-2022 09:36:14

```

```

Comment       = single_pulse
Data Format    = 1D COMPLEX
Dim_Size      = 13107
X_Domain      = Proton
Dim_Title     = Proton
Dim_Units     = [ppm]
Dimensions    = X
Spectrometer  = DELTA2_NMR

```

```

Field Strength = 9.4073814[T] (400[MHz])
X_Acq_Duration = 2.18103808[s]
X_Domain       = 1H
X_Freq         = 400.53219825[MHz]
X_Offset       = 5[ppm]
X_Points       = 16384
X_Prescans     = 1
X_Resolution   = 0.45849727[Hz]
X_Sweep        = 7.51201923[kHz]
X_Sweep_Clippped = 6.00961538[kHz]
Irr_Domain     = Proton
Irr_Freq       = 400.53219825[MHz]
Irr_Offset     = 5[ppm]
Tri_Domain     = Proton
Tri_Freq       = 400.53219825[MHz]
Tri_Offset     = 5[ppm]
Clipped        = FALSE
Scans          = 8
Total_Scans    = 8

```

```

Relaxation_Delay = 5[s]
Recvr_Gain       = 50
Temp_Get         = 18.6[dC]
X_90_Width       = 6[us]
X_Acq_Time       = 2.18103808[s]
X_Angle          = 45[deg]
X_Atn            = 0.8[dB]
X_Pulse          = 3[us]
Irr_Mode         = Off
Tri_Mode         = Off
Dante_Presat     = FALSE
Initial_Wait     = 1[s]
Repetition_Time  = 7.18103808[s]

```

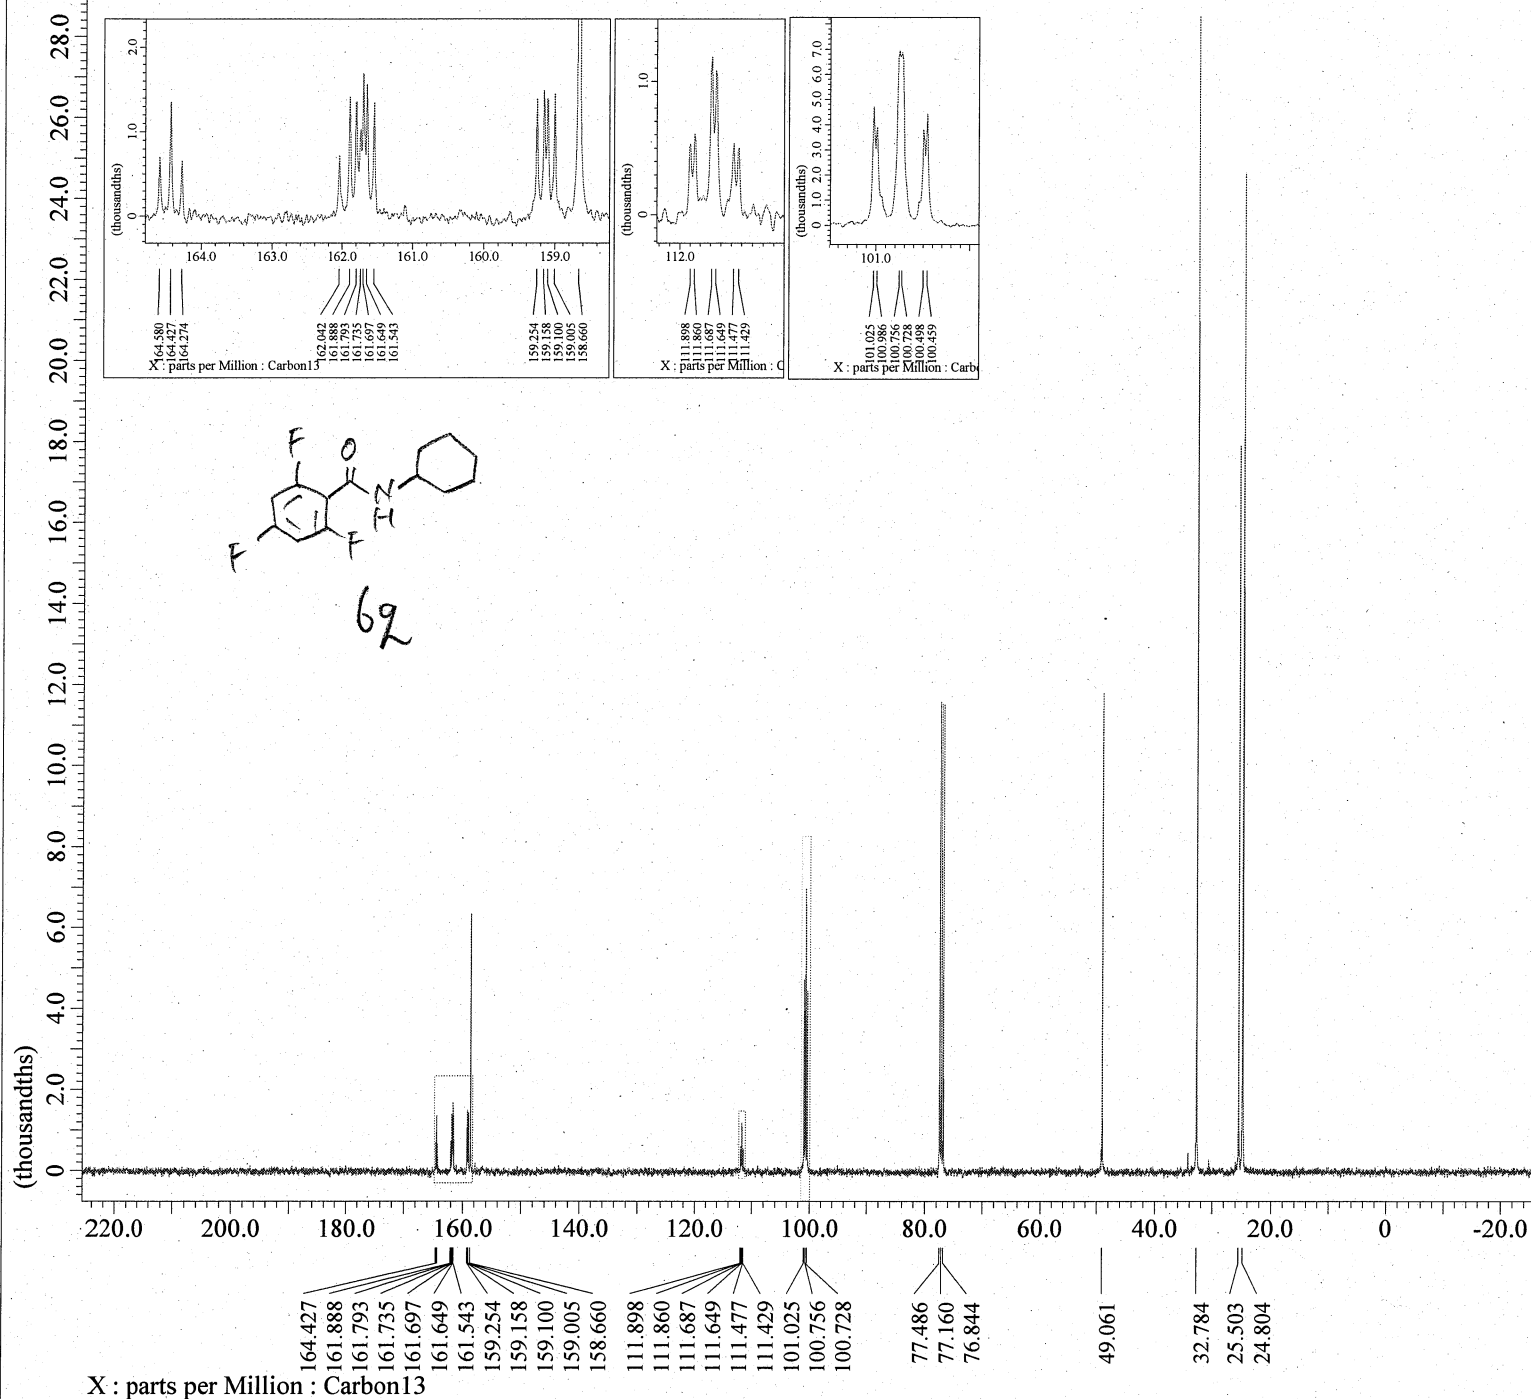

---- PROCESSING PARAMETERS ----  
 sexp( 2.0[Hz], 0.0[s] )  
 trapezoid( 0[%], 0[%], 80[%], 100[%] )  
 zerofill( 1 )  
 fft( 1, TRUE, TRUE )  
 machinephase  
 ppm

Derived from: TKH-1535\_carbon-1-1.jdf

Filename = TKH-1535\_carbon-1-  
 Author = element  
 Experiment = carbon.jxp  
 Sample\_Id = TKH-1535  
 Solvent = CHLOROFORM-D  
 Actual\_Start\_Time = 10-MAR-2022 16:20:  
 Revision\_Time = 16-MAR-2022 09:31:

Comment = single pulse decou  
 Data Format = 1D COMPLEX  
 Dim\_Size = 26214  
 X\_Domain = Carbon13  
 Dim\_Title = Carbon13  
 Dim\_Units = [ppm]  
 Dimensions = X  
 Spectrometer = DELTA2\_NMR

Field Strength = 9.2982153[T] (400[  
 X\_Acq\_Duration = 1.048576[s]  
 X\_Domain = Carbon13  
 X\_Freq = 99.54517646[MHz]  
 X\_Offset = 100[ppm]  
 X\_Points = 32768  
 X\_Prescans = 4  
 X\_Resolution = 0.95367432[Hz]  
 X\_Sweep = 31.25[kHz]  
 X\_Sweep\_Clippped = 25[kHz]  
 Irr\_Domain = Proton  
 Irr\_Freq = 395.88430144[MHz]  
 Irr\_Offset = 5[ppm]  
 Blanking = 5[us]  
 Clipped = TRUE  
 Scans = 400  
 Total\_Scans = 400

Relaxation\_Delay = 2[s]  
 Recvr\_Gain = 50  
 Temp\_Get = 18.5[dC]  
 X\_90\_Width = 9.65[us]  
 X\_Acq\_Time = 1.048576[s]  
 X\_Angle = 30[deg]  
 X\_Atn = 8[dB]  
 X\_Pulse = 3.21666667[us]  
 Irr\_Atn\_Dec = 25.059[dB]  
 Irr\_Atn\_Dec\_Calc = 25.059[dB]  
 Irr\_Atn\_Dec\_Default\_Calc = 25.059[dB]  
 Irr\_Atn\_No = 25.059[dB]  
 Irr\_Dec\_Bandwidth\_Hz = 4.7826087[kHz]  
 Irr\_Dec\_Bandwidth\_Ppm = 12.08082432[ppm]  
 Irr\_Dec\_Freq = 395.88430144[MHz]  
 Irr\_Dec\_Merit\_Factor = 2.2  
 Irr\_Decoupling = TRUE  
 Irr\_No = TRUE  
 Irr\_Noise = WALTZ  
 Irr\_Offset\_Default = 5[ppm]

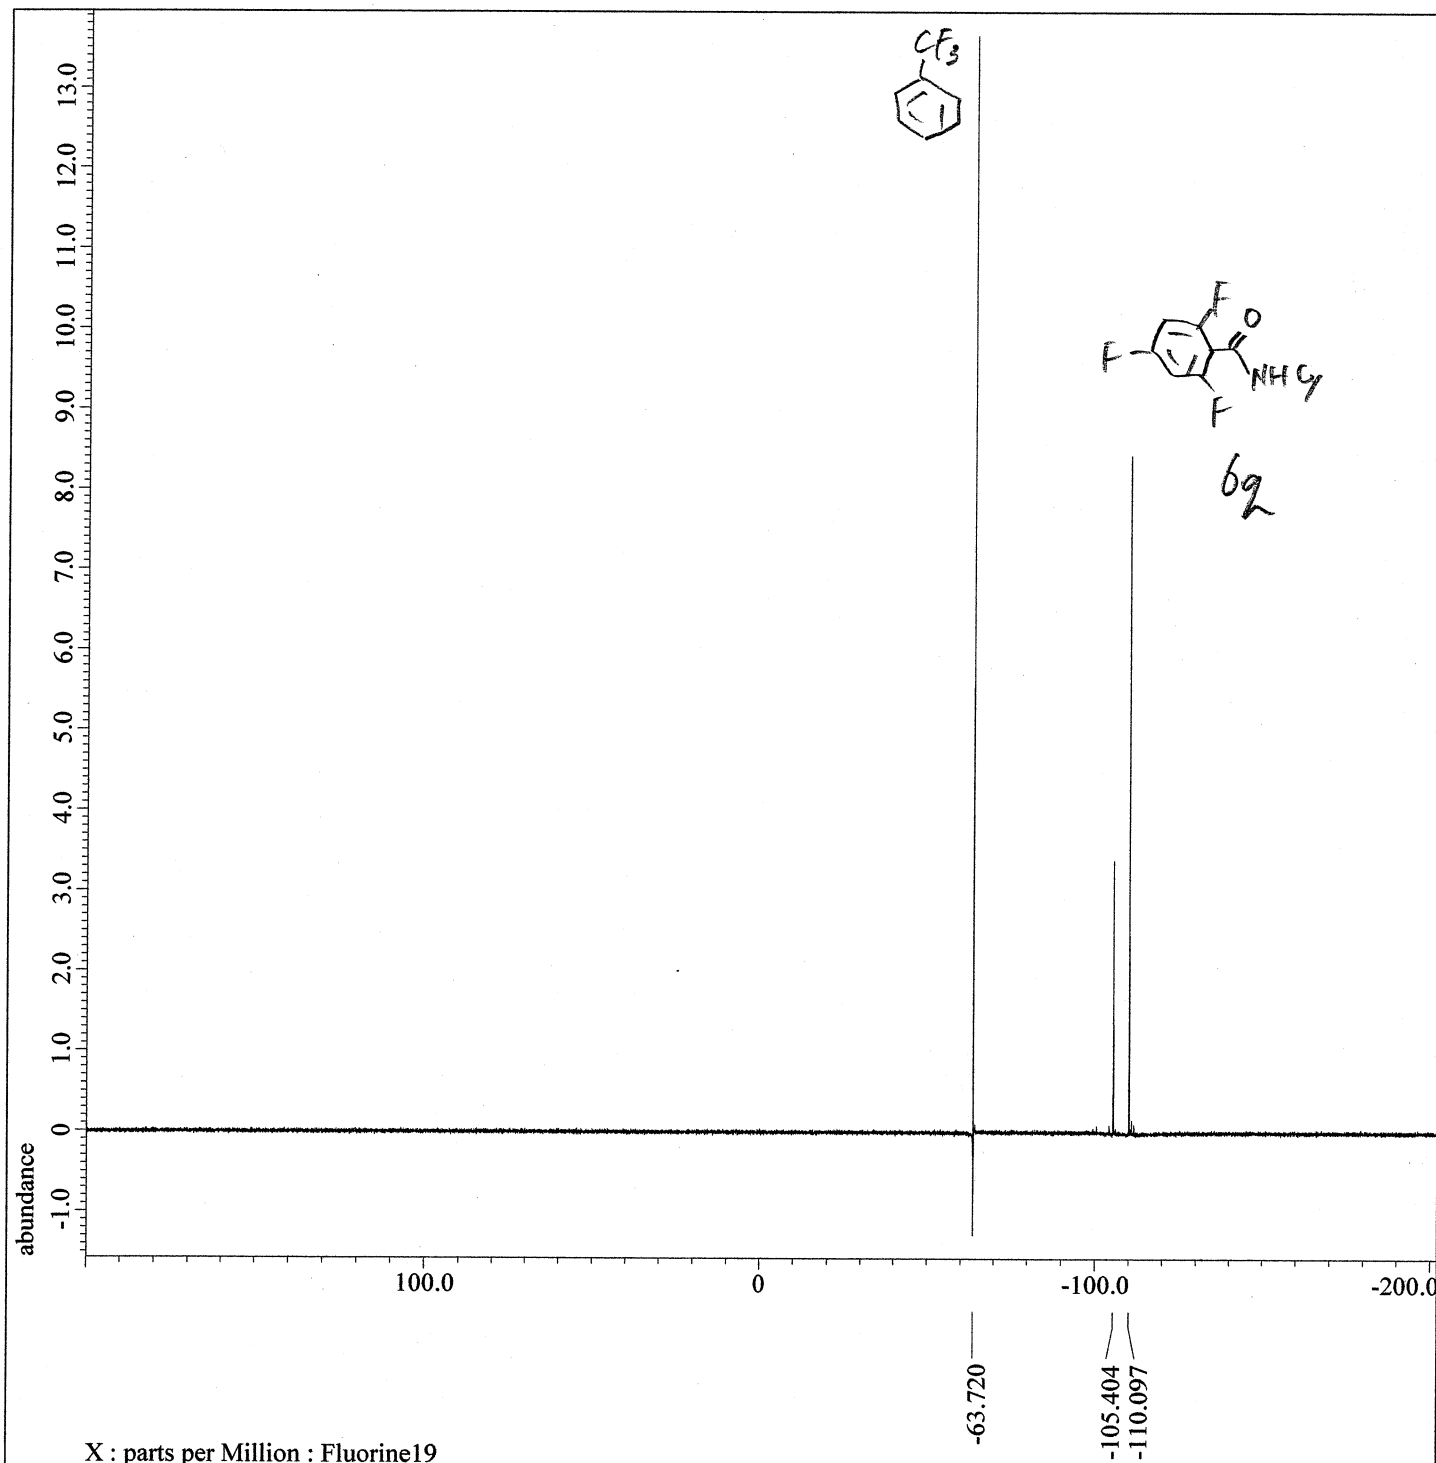

----- PROCESSING PARAMETERS -----  
 dc balance( 0, FALSE )  
 sexp( 0.2[Hz], 0.0[s] )  
 trapezoid( 0[%], 0[%], 80[%], 100[%] )  
 zerofill( 1 )  
 blip( 16, 64, 32 )  
 fft( 1, TRUE, TRUE )  
 machinephase  
 ppm  
 phase( -6, 0, 50[%] )

以下に由来: TKH-1535\_F\_standard\_single\_pulse

Filename = TKH-1535\_F\_standard\_sing  
 Author = element  
 Experiment = single\_pulse.jxp  
 Sample\_Id = TKH-1535 F standard  
 Solvent = CHLOROFORM-D  
 Creation\_Time = 5-MAR-2022 15:37:12  
 Revision\_Time = 5-MAR-2022 18:21:09  
 Current\_Time = 5-MAR-2022 18:21:15

Comment = single\_pulse  
 Data\_Format = 1D COMPLEX  
 Dim\_Size = 13107  
 Dim\_Title = Fluorine19  
 Dim\_Units = [ppm]  
 Dimensions = X  
 Spectrometer = DELTA2\_NMR

Field\_Strength = 9.4073814[T] (400[MHz])  
 X\_Acq\_Duration = 86.50752[ms]  
 X\_Domain = 19F  
 X\_Freq = 376.87675879[MHz]  
 X\_Offset = 0[ppm]  
 X\_Points = 16384  
 X\_Prescans = 1  
 X\_Resolution = 11.55968868[Hz]  
 X\_Sweep = 189.39393939[kHz]  
 X\_Sweep\_Clipped = 151.51515152[kHz]  
 Irr\_Domain = Fluorine19  
 Irr\_Freq = 376.87675879[MHz]  
 Irr\_Offset = 5[ppm]  
 Tri\_Domain = Fluorine19  
 Tri\_Freq = 376.87675879[MHz]  
 Tri\_Offset = 5[ppm]  
 Clipped = FALSE  
 Scans = 8  
 Total\_Scans = 8

Relaxation\_Delay = 5[s]  
 Recvr\_Gain = 46  
 Temp\_Get = 18.7[dC]  
 X\_90\_Width = 6.8[us]  
 X\_Acq\_Time = 86.50752[ms]  
 X\_Angle = 45[deg]  
 X\_Atn = 3[dB]  
 X\_Pulse = 3.4[us]  
 Irr\_Mode = Off  
 Tri\_Mode = Off  
 Dante\_Presat = FALSE  
 Initial\_Wait = 1[s]  
 Repetition\_Time = 5.08650752[s]
